# Supplementary material for: Engineering paralog-specific PSD-95 recombinant binders as minimally interfering multimodal probes for advanced imaging techniques
Source: eLife. 2024 Jan 3;13:e69620. doi: 10.7554/eLife.69620 (PMC10803022; doi:10.7554/eLife.69620)
Supplement: Figure 1—figure supplement 2—source data 1. [file elife-69620-fig1-figsupp2-data1.xlsx]

## Sheet: Fig1-FS2a
Fig 1- Figure Supplement 2a	Spreadsheet with the normalized fluorescence polarization data
	concentration PSD95-12 (µM)	Normalized fluorescence polarization values (mP)
	4.4e-05	4.59164	1.54309	2.55928
	0.0002	4.36583	1.31728	-5.6831
	0.0011	0.639819	-0.828002	4.81746
	0.0055	9.55965	7.07565	11.3662
	0.011	12.834	15.318	19.2699
	0.022	31.1253	33.6093	35.8675
	0.044	53.5943	53.1426	52.9168
	0.0879	74.1438	78.6601	75.4987
	0.1759	88.5962	89.0478	90.2898
	0.7036	95.3707	94.4674	87.8058
	2.8143	90.064	94.9191	94.9191
	11.2571	98.758	103.952	97.2902
