# Supplementary material for: Engineering paralog-specific PSD-95 recombinant binders as minimally interfering multimodal probes for advanced imaging techniques
Source: eLife. 2024 Jan 3;13:e69620. doi: 10.7554/eLife.69620 (PMC10803022; doi:10.7554/eLife.69620)
Supplement: Figure 1—figure supplement 2—source data 2. [file elife-69620-fig1-figsupp2-data2.xlsx]

## Sheet: Fig1-FS2b
Fig 1- Figure Supplement 2b	Spreadsheet with the normalized fluorescence polarization data
	concentration PSD95-12 (µM)	Normalized fluorescence polarization values (mP)
	0	14.037
	0.0139	8.70511
	0.0277	12.0783
	0.0555	0
	0.111	11.9695
	0.222	15.3428
	0.444	10.1197
	0.8879	20.5658
	1.7759	15.3428
	3.5517	28.5092
	7.1034	46.1371
	14.2068	53.1012
	28.4136	72.7965
	56.8273	78.4548
	113.654	95.321
	227.309	100
