# Supplementary material for: Engineering paralog-specific PSD-95 recombinant binders as minimally interfering multimodal probes for advanced imaging techniques
Source: eLife. 2024 Jan 3;13:e69620. doi: 10.7554/eLife.69620 (PMC10803022; doi:10.7554/eLife.69620)
Supplement: Figure 1—figure supplement 2—source data 3. [file elife-69620-fig1-figsupp2-data3.xlsx]

## Sheet: Fig1-FS2c
Fig 1- Figure Supplement 2c	Spreadsheet with the normalized fluorescence polarization data
		Normalized fluorescence polarization values (mP)
	Concentration Stg15 (M)	∅				+Xph15			+Xph20
	0	93.2876	99.6949
	4.733e-11	97.5591	102.136
	4.733e-09	103.204	96.7963
	3.313e-08	98.3219	92.8299
	9.94e-08	92.5248	94.6606
	2.982e-07	96.9489	100.305
	5.964e-07	102.899	88.8635
	1.074e-06	80.3204	71.7773
	2.147e-06	46.148	60.4882
	4.294e-06	38.3677	37.91
	1.288e-05	9.83982	11.5179
	3.865e-05	3.27994	-3.27994
	0			87.2241	95.3846	79.4224	84.6881	94.3662	83.0153	99.4413	96.6667
	1.014e-10			98.0602	101.94	94.7653	100	100	100	90.3166	100
	1.014e-08			91.2375	90.7023	100	90.1701	93.3602	92.3664	97.7654	98.75
	7.1e-08			85.4849	90.4348	93.1408	85.4442	88.33	90.0763	100	89.375
	2.13e-07			78.6622	80	84.296	76.1815	96.1771	82.4427	81.7505	79.1667
	6.39e-07			54.7157	62.4749	72.2022	64.0832	81.2877	64.1221	66.6667	62.0833
	1.278e-06			38.3946	49.6321	51.8051	41.5879	56.5392	52.8626	57.9143	41.875
	2.3e-06			46.8227	49.4983	51.9856	52.9301	47.4849	33.7786	49.162	30.2083
	4.601e-06			30.903	32.7759	24.0072	27.0321	25.9557	22.3282	27.5605	16.0417
	9.202e-06			15.9197	13.913	17.148	8.88469	14.2857	15.2672	16.7598	10.625
	2.76e-05			0.267559	-0.267559	0	1.13422	0	0	13.594	2.5
	8.281e-05			3.34448	3.47826	12.0939	0	8.65191	5.53435	0	0
