# Supplementary material for: Engineering paralog-specific PSD-95 recombinant binders as minimally interfering multimodal probes for advanced imaging techniques
Source: eLife. 2024 Jan 3;13:e69620. doi: 10.7554/eLife.69620 (PMC10803022; doi:10.7554/eLife.69620)
Supplement: Figure 1—figure supplement 2—source data 4. [file elife-69620-fig1-figsupp2-data4.xlsx]

## Sheet: Fig1-FS2d
	Fig 1- Figure Supplement 2d	Spreadsheet with the normalized fluorescence polarization data
		Fluorescence polarization values (mP)
	Concentration [Stg15]2 [M]	+Xph15						+Xph18						+Xph20
	0	97.4	97	102.2	84.3	90.6	86.3	65.1	64.8	60.8	72.1	69	67.4	99.5	102.6	103.8	104.1	100.6	94.3
	1.67e-11	108.7	102.4	103	100.8	93.3	100.7	67.4	67.3	68.9	68.6	65.4	70.7	94.2	97.5	103	94.2	97.5	103
	1.67e-09	102.8	99.2	108.4	91.5	92.9	89.5	73.1	74.1	73.8	74.9	68	66.9	97.3	101.3	100.1	102.7	97	94.4
	1.17e-08	96.2	99.4	97.4	91.3	90.4	85.1	66.8	66.4	65.2	62.1	64	62.5	99.7	100.8	103.5	93.4	105.4	96.2
	3.5e-08	91.5	92.1	88.6	86.1	83.3	83.9	64	66.4	67.5	65.8	66.8	64.1	88.9	95.7	89.1	87.8	91.5	90.3
	1.05e-07	81.7	81.6	83	71.6	64.6	68.5	59.9	57.4	56	68.3	67	59	79.1	81.1	82.3	88.8	83.5	83.3
	2.1e-07	74.7	75.6	72.6	62	59.6	64.5	64.4	59.5	59.6	57.1	58.1	56	71.5	78.5	71.6	74.9	75.2	73.1
	3.78e-07	67.1	68.5	64.5	57	60.6	57.4	62.6	63.5	64	59	62	57.5	72.6	70.5	69.3	67	65.1	71.4
	7.56e-07	66.8	61.5	65.1	59	54.7	57.1	56.5	60	64.1	58.5	57.2	55.6	63.9	65.7	59.4	65.8	58.8	57.2
	1.51e-06	65.9	63.2	65.1	52.9	56.9	55.3	59.5	64.6	59.2	52.6	51.4	46.5	61	57.5	64.7	60	58	59.7
	4.54e-06	61.6	65.3	58.8	50.7	55.3	55.8	58.2	55.4	54.7	55.1	57.7	59.9	60.4	58.1	58.4	58.9	52.2	53.9
	1.36e-05	67.6	63.7	64.2	55.7	50.8	47.9				55.7	57.1	61.7	59.8	59.8	59.6	64.2	62.7	58.6
