# Supplementary material for: Engineering paralog-specific PSD-95 recombinant binders as minimally interfering multimodal probes for advanced imaging techniques
Source: eLife. 2024 Jan 3;13:e69620. doi: 10.7554/eLife.69620 (PMC10803022; doi:10.7554/eLife.69620)
Supplement: Figure 1—source data 1. [file elife-69620-fig1-data1.xlsx]

## Sheet: Fig1c
Fig 1c	Spreadsheet with the normalized fluorescence polarization data
		Normalized fluorescence polarization values (mP)
	Concentration [Stg15]2 [M]	∅						+Xph15						+Xph20						+Xph0
	1.765e-11	100	100	100	100	100	100
	1.765e-09	86.0313	84.5946	84.7185	101.935	93.4579	102.65
	1.235e-08	87.5979	90.5405	97.185	100.149	91.5888	100.279
	3.706e-08	80.9399	87.7027	79.0885	88.9881	91.3218	92.4686
	1.112e-07	70.6266	74.1892	69.3029	68.006	69.0254	71.6876
	2.224e-07	52.611	46.2162	50.134	39.7321	38.9853	48.8145
	3.781e-07	38.2507	34.7297	28.0161	20.9821	31.5087	31.6597
	7.561e-07	16.9713	14.3243	15.1475	18.6012	7.87717	20.781
	1.512e-06	6.26632	0	0	8.48214	17.3565	11.0181
	4.537e-06	2.48042	2.16216	2.81501	2.97619	0	0.27894
	1.361e-05	0	3.24324	3.48525	0	3.87183	0
	1.67e-11							100	100	100	100	100	100	100	100	100	100	100	100	100	100	100	100	100	100
	1.67e-09							101.969	98.1172	92.5764	98.3452	119.437	90.3564	109.012	109.5	93.4978	96.8675	92.1053	103.073		110.035	91.2634	106.923	92.5743	87.404
	1.17e-08							78.337	93.7238	98.2533	98.818	100.256	103.564	115.988	108.25	101.121	81.4458	88.5167	97.8723	81.5172	110.381	88.0376	89.2308	87.2937	78.8018
	3.5e-08							72.2101	74.477	75.3275	95.0355	95.9079	83.8574	84.593	95.5	68.8341	76.3855	74.8804	93.617	68.2759	80.6228	72.5806	77.8846	68.9769	66.8203
	1.05e-07							60.3939	62.9707	60.4803	65.721	65.2174	60.3774	56.1047	59	53.5874	59.5181	52.6316	50.8274	52	45.6747	38.8441	48.4615	42.7393	42.2427
	2.1e-07							40.0438	49.3724	38.8646	41.3712	44.757	45.283	34.0116	52.5	29.5964	32.7711	15.5502	26.2411	28.4138	29.7578	25.5376	32.1154	34.1584	27.8034
	3.78e-07							17.9431	19.6653	22.7074	27.6596	28.6445	32.0755	37.2093	32.5	24.4395	22.6506	22.0096	24.3499	18.8966	18.5121	23.7903	32.8846	25.0825	22.427
	7.56e-07							7.87746	18.6192	18.3406	20.0946	10.2302	9.01468	11.9186	20.5	2.24215	12.0482	3.34928	8.27423	19.7241	16.955	18.6828	18.4615	18.9769	24.7312
	1.51e-06							6.78337	1.46444	0	9.69267	9.71867	14.6751	3.48837	0	14.1256	0	0	9.21986	9.7931	10.3806	13.0376	7.11538	5.77558	2.15054
	4.54e-06							0	0	0	0	0	0	1.74419	1.5	0	6.98795	17.7033	0	0	4.15225	2.95699	9.80769	1.65017	9.52381
	1.36e-05							2.84464	13.8075	14.6288	10.6383	3.58056	0.628931	0	5.75	2.69058	12.0482	1.19617	17.2577	1.24138	0	0	0	0	0
