# Supplementary material for: Engineering paralog-specific PSD-95 recombinant binders as minimally interfering multimodal probes for advanced imaging techniques
Source: eLife. 2024 Jan 3;13:e69620. doi: 10.7554/eLife.69620 (PMC10803022; doi:10.7554/eLife.69620)
Supplement: Figure 1—source data 2. [file elife-69620-fig1-data2.xlsx]

## Sheet: Fig1d
Fig 1d	Spreadsheet with the normalized fluorescence polarization data
		Normalized fluorescence polarization values (mP)
	Concentration Stg15 (M)	∅			+Xph18
	0	100	99.0338	93.4737	88.7195	87.7863	90.3904	76.9663	92.9825	87.9452
	2.419e-10	96.1945	99.2754	100	98.4756	100	100	86.7978	91.2281	89.0411
	2.419e-08	95.3488	100	95.5789	76.2195	73.7913	75.3754	89.3258	93.5673	88.7671
	1.694e-07	80.7611	93.7198	86.1053	100	93.6387	91.2913	96.0674	92.6901	100
	5.081e-07	78.6469	89.372	92.8421	92.9878	96.9466	97.2973	100	100	93.9726
	1.524e-06	75.0529	77.2947	89.8947	94.8171	91.6031	96.0961	90.1685	92.6901	91.7808
	3.048e-06	81.1839	85.0242	77.2632	69.5122	83.9695	69.6697	88.4831	85.6725	89.3151
	5.487e-06	76.1099	68.1159	80.6316	77.1341	74.3003	74.7748	75.5618	83.0409	69.0411
	1.097e-05	66.3848	62.5604	64.6316	54.5732	63.1043	64.5646	62.3596	69.0058	58.3562
	2.195e-05	44.8203	49.7585	45.2632	45.4268	55.4707	51.3514	56.4607	57.3099	52.0548
	6.585e-05	25.7928	16.6667	27.7895	17.6829	22.3919	13.8138	18.2584	28.655	20.274
	0.0001975	0	0	0	0	0	0	0	0	0
