# Supplementary material for: Engineering paralog-specific PSD-95 recombinant binders as minimally interfering multimodal probes for advanced imaging techniques
Source: eLife. 2024 Jan 3;13:e69620. doi: 10.7554/eLife.69620 (PMC10803022; doi:10.7554/eLife.69620)
Supplement: Figure 1—source data 3. [file elife-69620-fig1-data3.xlsx]

## Sheet: Fig1e
Fig 1e	Spreadsheet with the raw fluorescence lifetime data
	eGFP lifetime (ns)
	PSD-95-eGFP	vs Stargazin (1:1)	+ Xph0 (1:1:1)	+Xph0 (1:1:5)	+Xph15 (1:1:1)	+Xph15 (1:1:5)	+Xph18 (1:1:1)	+Xph18 (1:1:5)	+Xph20 (1:1:1)	+Xph20 (1:1:5)	+Competitor (1:1:5)
	2.546	1.944	1.764	1.888	1.977	2.025	1.861	2.2	1.764	2.131	2.156
	2.528	2.314	2.078	1.99	2.331	1.971	1.907	1.887	2.078	2.105	2.398
	2.501	2.154	1.774	2.399	1.993	1.938	1.784	1.832	1.774	2.076	2.269
	2.477	2.084	1.832	2.099	2.113	2.062	2.094	1.835	1.832	2.203	2.285
	2.51	2.106	2.097	1.999	2.07	2.042	2.259	2.138	2.097	2.214	2.146
	2.551	1.961	2.181	1.901	2.081	2.293	2.127	2.201	2.181	1.835	2.345
	2.56	2.127	2.182	1.88	2.016	1.861	2.121	2.091	2.182	2.062	2.273
	2.555	2.234	1.979	1.721	2.144	2.116	2.223	2.201	1.979	1.938	2.3
	2.524	1.947	1.96	2.235	2.117	2.147	2.05	2.214	1.96	1.765	2.309
	2.514	2.313	1.959	2.178	2.108	2	2.196	2.157	1.959	2.024	2.423
	2.529	2.133	1.873	2.264	1.828	1.971	1.951	2.118	1.873	1.799
	2.535	2.004	1.909	1.958	2.126	1.967	2.087	2.042	1.909	1.937
	2.521	2.206	1.863	1.697	1.88	2.262	2.158	1.837	1.863	1.963
	2.54	1.932	1.968	1.871	2.044	2.324	2.317	2.071	1.968	1.957
	2.554	1.821	1.934	2.064	1.882	2.124	1.981	2.166	1.934	1.794
	2.454	1.976	1.744	2.1	2.001	2.001	2.055	2.262	1.744	2.235
	2.466	2.01	2.061	2.367	1.982	1.921	2.242	2.039	2.061	1.912
	2.538	1.849	2.106	1.997	1.966	2.039	1.805	2.181	2.106	2.202
	2.471	1.83	2.094	1.919	2.022	2.329	2.019	1.914	2.094	2.196
	2.486	1.935	1.819	2.014	1.707	2.172	2.147	2.111	1.819	2.243
	2.465	1.828	2.138	2.071	2.023		2.076	1.805	2.138	1.979
	2.478	2.058	2.104	2.221	2.007		1.819	1.945	2.104	2.183
	2.472	1.809	2.096	2.147			2.193	2.203		1.881
	2.458	1.884	2.187	1.983			2.243	2.149		1.759
	2.45	1.872	2.211	1.916			1.982	1.907		1.895
	2.472	2.083	1.944	1.997				1.89		2.108
	2.45	2.003	2.176	2.053				1.906
	2.469	1.975	1.936	1.786				2.213
	2.472	2.043	2.187	1.945
	2.462	1.974	2.267	2.196
	2.508	1.889	2.131	2.052
	2.526	1.997	2.363	2.079
	2.548	2.204	1.97	1.986
	2.541	2.029	1.887	2.071
	2.561	1.941	2.103	2.252
	2.538	2.021	2.194	1.892
	2.536	1.835	2.174	2.015
	2.516	2.171	2.21	2.078
	2.544	2.002	2.352	2.012
	2.511	1.78	1.986	1.99
	2.524	1.853	2.127	2.047
	2.497	2.054	1.995	2.045
	2.5	1.829	2.271	2.053
	2.509	1.92	2.216	1.791
	2.522	1.908	2.077	2.058
		1.784	2.078	2.165
		1.993	1.974	1.848
		2.307	2.092	2.07
		1.964	2.072	1.986
		1.914	2.181	1.753
		2.236	2.205	2.004
			2.106	2.148
			1.711	2.159
			2.073	1.895
			1.828	1.853
			2.077	1.762
			1.777	2.032
			1.965	2.206
			1.659	2.144
			1.943	2.088
			2.119	1.966
			2.004	2.365
			1.926	1.895
			1.951	1.814
			2.113	1.825
			1.686	1.873
			1.923	1.835
			2.032	1.905
			1.693
