# Supplementary material for: Engineering paralog-specific PSD-95 recombinant binders as minimally interfering multimodal probes for advanced imaging techniques
Source: eLife. 2024 Jan 3;13:e69620. doi: 10.7554/eLife.69620 (PMC10803022; doi:10.7554/eLife.69620)
Supplement: Figure 1—source data 4. [file elife-69620-fig1-data4.xlsx]

## Sheet: Fig1f
Fig 1f	Spreadsheet with the raw fluorescence lifetime data
	eGFP lifetime (ns)
	eGFP	Probe	Probe off	+Xph15	+Xph18	+Xph20
	2.68	2.44	2.6	2.49	2.53	2.51
	2.68	2.4	2.45	2.4	2.5	2.49
	2.62	2.42	2.53	2.48	2.56	2.48
	2.73	2.37	2.52	2.39	2.45	2.48
	2.65	2.41	2.47	2.42	2.43	2.38
	2.67	2.44	2.56	2.47	2.49	2.39
	2.73	2.52	2.51	2.44	2.46	2.46
	2.73	2.43	2.53	2.38	2.5	2.46
	2.69	2.35	2.48	2.34	2.41	2.43
	2.71	2.35	2.55	2.32	2.39	2.31
	2.71	2.35	2.5	2.21	2.38	2.41
	2.69	2.51	2.53	2.44	2.43	2.45
	2.68	2.46	2.55	2.47	2.42	2.39
	2.71	2.38	2.54	2.49	2.4	2.37
	2.69	2.43	2.63	2.44	2.42	2.42
	2.67	2.37	2.54	2.43	2.41	2.43
	2.72	2.43	2.57	2.46	2.5	2.35
	2.71	2.51	2.56	2.49	2.43	2.43
	2.69	2.36	2.52	2.34	2.39	2.38
	2.71	2.33	2.56	2.39	2.37	2.47
	2.69	2.46		2.48	2.53	2.41
	2.74	2.41		2.45	2.53	2.45
	2.74	2.48		2.53	2.46	2.42
	2.72	2.41		2.41	2.44	2.48
	2.7	2.46		2.54	2.54	2.52
	2.78	2.46		2.51	2.54	2.5
	2.7	2.33		2.47	2.5	2.49
	2.82	2.38		2.43	2.62	2.45
	2.7	2.38		2.46	2.47	2.54
	2.74	2.42		2.45	2.49	2.58
	2.77	2.44		2.47	2.55	2.46
	2.74	2.46		2.45	2.53	2.54
	2.75	2.42		2.38	2.45	2.33
	2.79	2.4		2.48	2.45	2.44
	2.73	2.4		2.53	2.44	2.42
	2.78	2.43		2.41	2.56	2.49
	2.69	2.59		2.46	2.5	2.45
	2.73	2.51		2.49	2.44	2.49
	2.77	2.53		2.45	2.47	2.45
	2.75	2.54		2.6	2.46	2.47
	2.73					2.41
	2.74
