# Supplementary material for: Engineering paralog-specific PSD-95 recombinant binders as minimally interfering multimodal probes for advanced imaging techniques
Source: eLife. 2024 Jan 3;13:e69620. doi: 10.7554/eLife.69620 (PMC10803022; doi:10.7554/eLife.69620)
Supplement: Figure 2—figure supplement 1—source data 1. [file elife-69620-fig2-figsupp1-data1.xlsx]

## Sheet: Fig2-FS1a
Fig 2- Figure Supplement 1a	Spreadsheet with the raw mEPSCs amplitude data
		Amplitude (pA)
		Control	Xph15	Xph18
		34.14	12.33	20.22
		15.52	14.66	13.27
		13.33	9.197	35.36
		48.64	19.17	19.91
		10.64	28.84	12.76
		18.62	29.85	16.26
		11.97	13.54	16.81
		39.1	17.56	17.38
		13.03	19.01	24.35
		27.8	21.93	11.18
		9.799	11.04	16.18
		12.36	22.94
		18.98	22.12
		15.46	9.141
		15.06	12.44
		22.06
		14.32
		16.77
		11.18
		9.661
