# Supplementary material for: Engineering paralog-specific PSD-95 recombinant binders as minimally interfering multimodal probes for advanced imaging techniques
Source: eLife. 2024 Jan 3;13:e69620. doi: 10.7554/eLife.69620 (PMC10803022; doi:10.7554/eLife.69620)
Supplement: Figure 2—figure supplement 1—source data 2. [file elife-69620-fig2-figsupp1-data2.xlsx]

## Sheet: Fig2-FS1b
Fig 2- Figure Supplement 1b	Spreadsheet with the raw mEPSCs frequency data
		Frequency (Hz)
		Control	Xph15	Xph18
		10.6315	2.39923	1.60256
		1.93013	1.60694	1.87406
		4.80769	2.16357	2.14041
		0.324044	0.640205	2.47219
		7.79423	2.78396	2.67308
		1.03961	0.558036	8.01925
		0.443459	0.879507	1.87723
		1.99322	0.256147	10.2459
		1.88608	8.59845	1.19417
		9.37207	9.88142	1.64366
		1.17689	0.940734	4.17188
		1.19403	2.22222
		3.11624	1.72354
		0.603865	0.312793
		0.833333	0.384615
		2.59
		0.691085
		2.18341
		1.40865
		4.90437
