# Supplementary material for: Engineering paralog-specific PSD-95 recombinant binders as minimally interfering multimodal probes for advanced imaging techniques
Source: eLife. 2024 Jan 3;13:e69620. doi: 10.7554/eLife.69620 (PMC10803022; doi:10.7554/eLife.69620)
Supplement: Figure 2—figure supplement 1—source data 3. [file elife-69620-fig2-figsupp1-data3.xlsx]

## Sheet: Fig2-FS1c
Fig 2- Figure Supplement 1c	Spreadsheet with the raw mEPSCs decay time data
		Decay time (ms)
		Control	Xph15	Xph18
		3.404	6.627	3.684
		4.151	3.782	4.895
		4.021	7.379	3.752
		3.602	4.864	3.635
		4.487	3.901	6.397
		4.153	5.075	3.978
		6.665	5.067	5.77
		4.662	5.11	3.333
		2.374	3.564	3.225
		3.663	4.042	4.357
		3.901	2.504	3.228
		4.262	4.17
		5.203	3.981
		4.966	7.265
		4.684	6.491
		5.838
		5.376
		6.062
		2.26
		5.567
