# Supplementary material for: Engineering paralog-specific PSD-95 recombinant binders as minimally interfering multimodal probes for advanced imaging techniques
Source: eLife. 2024 Jan 3;13:e69620. doi: 10.7554/eLife.69620 (PMC10803022; doi:10.7554/eLife.69620)
Supplement: Figure 2—figure supplement 1—source data 4. [file elife-69620-fig2-figsupp1-data4.xlsx]

## Sheet: Fig2-FS1d
Fig 2- Figure Supplement 1d	Spreadsheet with the raw mEPSCs rise time data
		Rise time (ms)
		Control	Xph15	Xph18
		0.9931	2.058	1.094
		1.209	1.147	1.63
		1.397	2.313	2.007
		1.064	1.715	0.9507
		2.43	1.475	2.714
		1.471	2.066	1.43
		2.444	1.658	2.229
		1.071	1.446	1.596
		4.004	1.573	0.8775
		2.011	1.935	1.718
		1.927	1.901	1.18
		2.463	1.088
		1.424	1.216
		1.229	3.126
		1.719	2.095
		1.937
		2.052
		2.138
		1.905
		1.95
