# Supplementary material for: Engineering paralog-specific PSD-95 recombinant binders as minimally interfering multimodal probes for advanced imaging techniques
Source: eLife. 2024 Jan 3;13:e69620. doi: 10.7554/eLife.69620 (PMC10803022; doi:10.7554/eLife.69620)
Supplement: Figure 2—figure supplement 2—source data 1. [file elife-69620-fig2-figsupp2-data1.xlsx]

## Sheet: Fig2-FS2
Fig 2- Figure Supplement 2	Spreadsheet with the cumulative diffusion distribution data
		WT		Xph15		Xph18		Xph20
	Log diffusion	mean	SEM	mean	SEM	mean	SEM	mean	SEM
	-5	28.92	1.007	28.2	1.12	28.13	1.427	28.82	2.487
	-4.8	28.98	1.009	28.27	1.126	28.2	1.422	28.93	2.461
	-4.6	29.06	1.01	28.35	1.134	28.27	1.423	29.13	2.471
	-4.4	29.21	1.015	28.51	1.142	28.41	1.42	29.32	2.498
	-4.2	29.46	1.015	28.7	1.139	28.69	1.422	29.58	2.538
	-4	29.77	1.027	29.03	1.147	29.03	1.432	30.23	2.623
	-3.8	30.32	1.037	29.57	1.175	29.56	1.44	30.98	2.682
	-3.6	31.26	1.063	30.44	1.204	30.49	1.445	31.95	2.803
	-3.4	32.66	1.098	31.74	1.262	31.9	1.434	33.59	3.014
	-3.2	34.56	1.161	33.53	1.323	33.84	1.489	35.8	3.211
	-3	37.2	1.238	36.06	1.472	36.42	1.559	39.03	3.502
	-2.8	40.54	1.355	39.36	1.622	40.08	1.634	42.89	3.663
	-2.6	44.58	1.47	43.37	1.817	44.32	1.749	47.14	3.798
	-2.4	49.51	1.613	48.12	1.98	49.27	1.87	52.34	4.124
	-2.2	54.78	1.734	53.44	2.137	54.57	2.056	57.99	4.157
	-2	59.98	1.796	58.28	2.247	60.16	2.169	63.01	4.112
	-1.8	65.14	1.857	63.14	2.29	65.36	2.34	67.79	3.975
	-1.6	70.01	1.87	68.05	2.271	70.52	2.412	72.98	3.437
	-1.4	74.81	1.888	72.99	2.192	75.93	2.35	78.35	2.964
	-1.2	79.53	1.846	78.26	2.101	81.56	2.238	83.71	2.477
	-1	84.28	1.738	83.67	1.818	86.93	2.049	89.55	1.68
	-0.8	88.29	1.572	88.53	1.544	90.81	1.805	94.28	0.9268
	-0.6	91.7	1.289	92.44	1.178	93.84	1.493	97.57	0.4401
	-0.4	94.44	0.9667	95.08	0.8099	96.07	1.062	99.16	0.1307
	-0.2	96.7	0.6182	97.35	0.4795	97.79	0.6068	99.82	0.03565
	0	98.45	0.3092	98.84	0.2052	98.98	0.2901	99.98	0.01207
	0.2	99.48	0.1075	99.63	0.0721	99.69	0.09527	100	0
	0.4	99.89	0.02773	99.94	0.0158	99.97	0.01507	100	0
	0.6	99.99	0.004024	99.99	0.003334	100	0.001971	100	0
	0.8	100	0.00112	100	0	100	0	100	0
	1	100	0	100	0	100	0	100	0
