# Supplementary material for: Engineering paralog-specific PSD-95 recombinant binders as minimally interfering multimodal probes for advanced imaging techniques
Source: eLife. 2024 Jan 3;13:e69620. doi: 10.7554/eLife.69620 (PMC10803022; doi:10.7554/eLife.69620)
Supplement: Figure 2—source data 1. [file elife-69620-fig2-data1.xlsx]

## Sheet: Fig2b
Fig 2b	Spreadsheet with the raw mEPSCs amplitude data
	Amplitude (pA)
	control	Xph15	Xph18	Xph20
	20.5765	15.1279	22.4575	25.9608
	31.6198	47.92	19.7553	36.9211
	21.2634	49.1076	28.7659	18.426
	17.9795	21.1861	13.9856	7.80781
	21.2117	18.4135	14.6222	7.20023
	8.41317	25.6812	37.5837	11.1762
	10.4779	13.5269	27.8137	15.2482
	45.9573	19.1206	19.5824	14.8328
	13.1743	11.1323	21.3	21.713
	27.2997	54.1529	16.9383	13.9425
	36.7572	19.4909	20.6801	12.2796
	21.5389	10.0376	15.7053	30.1868
	11.5895	12.3535	12.6956	15.0081
	23.4644	16.1133	39.1947	24.5047
	25.9088	39.8332	10.4671	25.4107
	13.7509		15.8193	7.4445
	21.1765		24.0846
	17.1079
	16.2529
