# Supplementary material for: Engineering paralog-specific PSD-95 recombinant binders as minimally interfering multimodal probes for advanced imaging techniques
Source: eLife. 2024 Jan 3;13:e69620. doi: 10.7554/eLife.69620 (PMC10803022; doi:10.7554/eLife.69620)
Supplement: Figure 2—source data 3. [file elife-69620-fig2-data3.xlsx]

## Sheet: Fig2d
Fig2d	Spreadsheet with the raw mEPSCs decay data
	Decay time (ms)
	control	Xph15	Xph18	Xph20
	9.2169	6.19191	6.33341	7.77626
	6.00695	5.75588	7.41019	6.19161
	7.49819	6.69784	7.65881	7.99758
	7.40576	6.42297	5.52383	5.42976
	6.82976	7.62996	5.96673	6.19301
	6.68101	8.53937	8.2478	7.29658
	5.38232	9.49238	6.36149	5.91428
	7.09755	6.88722	7.75102	6.44439
	8.30603	6.37538	5.79465	8.52853
	7.30082	4.81464	6.88774	6.61707
	8.01204	5.3441	8.22827	7.23504
	7.76906	5.59039	5.91614	6.01267
	8.76691	6.80121	6.56067	6.04146
	6.52977	5.91934	5.75907	5.32344
	6.78279	5.23317	7.30386	5.87689
	6.58877		6.23975	5.9306
	7.18377		5.70989
	6.88806
	7.59512
