# Supplementary material for: Engineering paralog-specific PSD-95 recombinant binders as minimally interfering multimodal probes for advanced imaging techniques
Source: eLife. 2024 Jan 3;13:e69620. doi: 10.7554/eLife.69620 (PMC10803022; doi:10.7554/eLife.69620)
Supplement: Figure 2—source data 4. [file elife-69620-fig2-data4.xlsx]

## Sheet: Fig2e
Fig 2e	Spreadsheet with the raw mEPSCs rise time data
	Rise time (ms)
	control	Xph15	Xph18	Xph20
	0.715263	1.08796	0.830616	0.772996
	0.605775	0.610429	1.07421	0.656798
	0.684294	0.634343	0.69026	0.947996
	0.777316	1.0247	1.66455	1.32156
	0.759966	1.36979	1.24683	1.40626
	2.0162	0.725663	0.625424	0.76912
	1.21493	1.00528	0.67542	1.46561
	0.721519	0.69492	1.04248	0.857779
	1.03185	1.28425	0.708822	1.02218
	0.69165	0.538478	0.81519	1.45957
	0.75399	1.62303	0.74477	0.868819
	0.783547	1.6378	0.717412	0.670186
	1.15539	0.861118	0.898092	1.29357
	0.639418	0.993748	0.608069	0.811171
	0.704218	0.638915	1.00223	0.976381
	1.0725		1.17141	1.61301
	0.970363		0.62877
	0.960085
	0.957446
