# Supplementary material for: Engineering paralog-specific PSD-95 recombinant binders as minimally interfering multimodal probes for advanced imaging techniques
Source: eLife. 2024 Jan 3;13:e69620. doi: 10.7554/eLife.69620 (PMC10803022; doi:10.7554/eLife.69620)
Supplement: Figure 2—source data 5. [file elife-69620-fig2-data5.xlsx]

## Sheet: Fig2g
Fig 2g	Spreadsheet with the diffusion distribution data
		Occurrence (%)
		control		Xph15		Xph18		Xph20
	log Diffusion	mean	SEM	mean	SEM	mean	SEM	mean	SEM
	-5	28.92	1.007	28.2	1.12	28.13	1.427	28.82	2.487
	-4.8	0.05507	0.00797	0.06672	0.01763	0.07437	0.01741	0.1103	0.02932
	-4.6	0.08552	0.016	0.07996	0.0173	0.06703	0.01286	0.201	0.04514
	-4.4	0.1482	0.01756	0.1648	0.02576	0.1449	0.02028	0.1911	0.06332
	-4.2	0.245	0.02871	0.1887	0.02339	0.2734	0.03111	0.2644	0.05668
	-4	0.3187	0.03456	0.3266	0.04426	0.3456	0.03873	0.6456	0.1004
	-3.8	0.5455	0.04466	0.5434	0.06178	0.526	0.05179	0.7518	0.08266
	-3.6	0.9437	0.07285	0.8637	0.07723	0.9337	0.06302	0.9636	0.1383
	-3.4	1.393	0.09855	1.303	0.1174	1.408	0.1127	1.642	0.2177
	-3.2	1.9	0.1164	1.791	0.1325	1.937	0.1388	2.212	0.2398
	-3	2.643	0.1474	2.528	0.1908	2.581	0.1256	3.235	0.3439
	-2.8	3.345	0.1721	3.297	0.2049	3.658	0.1936	3.854	0.1872
	-2.6	4.033	0.1724	4.012	0.2341	4.24	0.1554	4.253	0.2202
	-2.4	4.933	0.1803	4.75	0.2521	4.951	0.1703	5.201	0.3677
	-2.2	5.273	0.1771	5.319	0.2072	5.302	0.2553	5.644	0.1875
	-2	5.198	0.1835	4.848	0.2025	5.589	0.2687	5.024	0.2781
	-1.8	5.16	0.2315	4.854	0.18	5.197	0.3029	4.782	0.3291
	-1.6	4.863	0.2267	4.907	0.2137	5.16	0.282	5.185	0.5697
	-1.4	4.804	0.2558	4.94	0.2581	5.412	0.3766	5.376	0.5903
	-1.2	4.722	0.2615	5.278	0.2651	5.628	0.475	5.358	0.5608
	-1	4.745	0.276	5.406	0.459	5.374	0.8128	5.836	0.8351
	-0.8	4.016	0.284	4.865	0.3868	3.879	0.4054	4.736	0.8924
	-0.6	3.412	0.3176	3.906	0.4068	3.031	0.4174	3.29	0.5074
	-0.4	2.733	0.3403	2.644	0.3801	2.227	0.4396	1.584	0.326
	-0.2	2.259	0.3517	2.266	0.3411	1.72	0.4619	0.6629	0.1166
	0	1.754	0.3122	1.49	0.278	1.199	0.3273	0.1606	0.04314
	0.2	1.027	0.2043	0.7908	0.1381	0.7012	0.206	0.01811	0.01207
	0.4	0.4165	0.08272	0.3055	0.06118	0.2817	0.08593	0	0
	0.6	0.09619	0.02487	0.05659	0.01368	0.0301	0.01404	0	0
	0.8	0.01004	0.003637	0.006381	0.003334	0.001971	0.001971	0	0
	1	0.00112	0.00112	0	0	0	0	0	0
