# Supplementary material for: Engineering paralog-specific PSD-95 recombinant binders as minimally interfering multimodal probes for advanced imaging techniques
Source: eLife. 2024 Jan 3;13:e69620. doi: 10.7554/eLife.69620 (PMC10803022; doi:10.7554/eLife.69620)
Supplement: Figure 2—source data 6. [file elife-69620-fig2-data6.xlsx]

## Sheet: Fig2h
Fig 2h	Spreadsheet with the percentage of mobile AMPARs data
	Percentage mobile AMPARs
	control	Xph15	Xph18	Xph20
	29.5056	31.6379	23.3121	48.417
	22.4467	26.5896	23.0812	30.0785
	15.4735	19.0332	30.4688	25.443
	33.2073	33.0498	21.7364	20.481
	27.1821	41.531	33.7341	22.7736
	29.3633	53.4818	35.918	35.3816
	42.4439	48.8697	48.583	42.8808
	48.2094	58.7736	26.4017
	60.6299	45.1977	38.7069
	35.4699	40.7313	46.7962
	35.1547	36.2671	46.7078
	35.3942	37.6947	34.49
	36.1111	45.0244	35.0127
	39.9523	36.6012	26.6589
	26.1933	60.6272	24.8026
	37.4194	45.7427	56.7723
	40.3732	45.1791	36.5657
	38.0531	43.0276	33.8485
	33.2994	20.098
	44.2748	33.4424
	29.454	35.8226
	20.6691	24.7358
	28.2467	38.7195
	30.4592	27.5296
	43.6627	16.5354
	43.6644	16.0248
		33.2851
