# Supplementary material for: Engineering paralog-specific PSD-95 recombinant binders as minimally interfering multimodal probes for advanced imaging techniques
Source: eLife. 2024 Jan 3;13:e69620. doi: 10.7554/eLife.69620 (PMC10803022; doi:10.7554/eLife.69620)
Supplement: Figure 2—source data 7. [file elife-69620-fig2-data7.xlsx]

## Sheet: Sheet1
Figure 2 - Source Data 7
	The mass spectrometry proteomics data have been deposited to the ProteomeXchange Consortium via the PRIDE partner repository with the dataset identifier PXD045002 (FigFigure 2i panel 2i).
	Experiment #1 Known PSD-95 binders	Log2(abundance ratio)	-Log(abundance Ratio adjusted P-Value)			Experiment #1 other proteins	Log2(abundance ratio)	-Log(abundance Ratio adjusted P-Value)			Experiment #2 Known PSD-95 binders	Log2(abundance ratio)	-Log(abundance Ratio adjusted P-Value)			Experiment #2 other proteins	Log2(abundance ratio)	-Log(abundance Ratio adjusted P-Value)
	Actin, cytoplasmic 1 OS=Rattus norvegicus OX=10116 GN=Actb PE=1 SV=1	-0.120294	0.681937			Inositol-trisphosphate 3-kinase A OS=Rattus norvegicus OX=10116 GN=Itpka PE=1 SV=3	-4.05889	1.12494			Disks large homolog 3 OS=Rattus norvegicus OX=10116 GN=Dlg3 PE=1 SV=1	1.41305	0.294798			Nestin OS=Rattus norvegicus OX=10116 GN=Nes PE=1 SV=2	-4.03505	0.253354
	Disks large homolog 4 OS=Rattus norvegicus OX=10116 GN=Dlg4 PE=1 SV=1	0.226509	0.879426			Nestin OS=Rattus norvegicus OX=10116 GN=Nes PE=1 SV=2	-3.8365	0.89279			Disks large homolog 3 OS=Rattus norvegicus OX=10116 GN=Dlg3 PE=1 SV=1	-0.321928	0.83707			Toll-interacting protein OS=Rattus norvegicus OX=10116 GN=Tollip PE=1 SV=1	-3.75633	1.32857
	Calcium/calmodulin-dependent protein kinase type II subunit alpha OS=Rattus norvegicus OX=10116 GN=Camk2a PE=1 SV=1	0.111031	0.730487			Neural cell adhesion molecule 1 OS=Rattus norvegicus OX=10116 GN=Ncam1 PE=1 SV=2	-2.8365	0.186419			Disks large homolog 4 OS=Rattus norvegicus OX=10116 GN=Dlg4 PE=1 SV=1	0.116365	0.499227			Dual specificity tyrosine-phosphorylation-regulated kinase 1A OS=Rattus norvegicus OX=10116 GN=Dyrk1a PE=1 SV=2	-3.57347	0.622588
	Protein piccolo OS=Rattus norvegicus OX=10116 GN=Pclo PE=1 SV=1	0.659925	0.943095			Myosin heavy chain 4 OS=Rattus norvegicus OX=10116 GN=Myh1 PE=1 SV=2	-2.8365	1.11919			Disks large homolog 1 OS=Rattus norvegicus OX=10116 GN=Dlg1 PE=1 SV=1	0.119024	0.18875			Nexilin OS=Rattus norvegicus OX=10116 GN=Nexn PE=1 SV=1	-3.38082	0.745654
	Connector enhancer of kinase suppressor of ras 2 OS=Rattus norvegicus OX=10116 GN=Cnksr2 PE=1 SV=1	0.0426443	0.169411			Guanine nucleotide-binding protein G(I)/G(S)/G(T) subunit beta-2 OS=Rattus norvegicus OX=10116 GN=Gnb2 PE=1 SV=4	-2.73697	0.35164			Actin, cytoplasmic 1 OS=Rattus norvegicus OX=10116 GN=Actb PE=1 SV=1	-0.62371	0.771423			Neuronal migration protein doublecortin OS=Rattus norvegicus OX=10116 GN=Dcx PE=1 SV=1	-3.1078	0.932922
	Ras/Rap GTPase-activating protein SynGAP OS=Rattus norvegicus OX=10116 GN=Syngap1 PE=1 SV=2	-0.785875	0.876148			Myosin-11 OS=Rattus norvegicus OX=10116 GN=Myh11 PE=1 SV=2	-2.64386	1.87943			Connector enhancer of kinase suppressor of ras 2 OS=Rattus norvegicus OX=10116 GN=Cnksr2 PE=1 SV=1	0.617298	0.888719			Vimentin OS=Rattus norvegicus OX=10116 GN=Vim PE=1 SV=2	-3	1.32857
	AP-3 complex subunit beta OS=Rattus norvegicus OX=10116 GN=Ap3b2 PE=1 SV=1	1.08406	1.37675			Glial fibrillary acidic protein OS=Rattus norvegicus OX=10116 GN=Gfap PE=1 SV=2	-2.64386	2.42829			Ras/Rap GTPase-activating protein SynGAP OS=Rattus norvegicus OX=10116 GN=Syngap1 PE=1 SV=2	-2.04692	0.836941			Protein tweety homolog OS=Rattus norvegicus OX=10116 GN=Ttyh3 PE=1 SV=1	-2.86775	0.463167
	Microtubule-associated protein 1 A, isoform CRA_c OS=Rattus norvegicus OX=10116 GN=Map1a PE=1 SV=1	-0.200913	0.110698			Vimentin OS=Rattus norvegicus OX=10116 GN=Vim PE=1 SV=2	-2.55639	1.92812			Glutamate receptor OS=Rattus norvegicus OX=10116 GN=Grin2b PE=1 SV=1	-2.17137	1.16234			Glial fibrillary acidic protein OS=Rattus norvegicus OX=10116 GN=Gfap PE=1 SV=2	-2.85726	1.32857
	Glutamate receptor OS=Rattus norvegicus OX=10116 GN=Grin2b PE=1 SV=1	-0.666576	0.818156			Transmembrane protein 130 OS=Rattus norvegicus OX=10116 GN=Tmem130 PE=4 SV=2	-2.39593	1.46471			Calcium/calmodulin-dependent protein kinase type II subunit alpha OS=Rattus norvegicus OX=10116 GN=Camk2a PE=1 SV=1	-0.520769	1.04634			Extracellular leucine-rich repeat and fibronectin type III domain-containing 2 OS=Rattus norvegicus OX=10116 GN=Elfn2 PE=1 SV=3	-2.79586	1.3245
	TRAF2 and NCK-interacting kinase OS=Rattus norvegicus OX=10116 GN=Tnik PE=1 SV=1	-0.434403	0.376751			Gamma-enolase OS=Rattus norvegicus OX=10116 GN=Eno2 PE=1 SV=2	-2.25154	1.10403			Glutamate receptor ionotropic, NMDA 1 OS=Rattus norvegicus OX=10116 GN=Grin1 PE=1 SV=1	-1.72261	1.10278			Alpha-actinin-1 OS=Rattus norvegicus OX=10116 GN=Actn1 PE=1 SV=1	-2.79586	0.943828
	Heterogeneous nuclear ribonucleoprotein K OS=Rattus norvegicus OX=10116 GN=Hnrnpk PE=1 SV=1	-0.251539	0.273273			Importin 5 OS=Rattus norvegicus OX=10116 GN=Ipo5 PE=1 SV=1	-2.18442	0.457175			SH3 and multiple ankyrin repeat domains protein 1 OS=Rattus norvegicus OX=10116 GN=Shank1 PE=1 SV=1	-3.03505	0.802433			Thioredoxin OS=Rattus norvegicus OX=10116 GN=Txn1 PE=1 SV=1	-2.76611	0.760473
	Leucine-rich repeat-containing protein 7 OS=Rattus norvegicus OX=10116 GN=Lrrc7 PE=1 SV=2	-0.836501	0.970616			Actin filament-associated protein 1 OS=Rattus norvegicus OX=10116 GN=Afap1 PE=1 SV=1	-2.18442	1.13787			Leucine-rich repeat-containing protein 7 OS=Rattus norvegicus OX=10116 GN=Lrrc7 PE=1 SV=2	-2.02915	0.770694			Peroxiredoxin-2 OS=Rattus norvegicus OX=10116 GN=Prdx2 PE=1 SV=1	-2.67116	0.114867
	SLIT-ROBO Rho GTPase-activating protein 3 OS=Rattus norvegicus OX=10116 GN=Srgap3 PE=1 SV=2	-0.415037	0.325139			Glutamine synthetase OS=Rattus norvegicus OX=10116 GN=Glul PE=1 SV=3	-2.12029	0.41005			Potassium voltage-gated channel subfamily A member 1 OS=Rattus norvegicus OX=10116 GN=Kcna1 PE=1 SV=1	0.54498	0.737803			Unconventional myosin-Vb OS=Rattus norvegicus OX=10116 GN=Myo5b PE=1 SV=1	-2.59946	0.37298
	Ataxin 2 OS=Rattus norvegicus OX=10116 GN=Atxn2 PE=1 SV=3	-1.12029	1.17393			Protein PRRC2A OS=Rattus norvegicus OX=10116 GN=Prrc2a PE=1 SV=1	-2.05889	0.627088			TRAF2 and NCK-interacting kinase OS=Rattus norvegicus OX=10116 GN=Tnik PE=1 SV=1	0.107018	0.0313892			Neurosecretory protein VGF OS=Rattus norvegicus OX=10116 GN=Vgf PE=1 SV=3	-2.55639	0.848706
	Disks large homolog 3 OS=Rattus norvegicus OX=10116 GN=Dlg3 PE=1 SV=1	-0.0588937	0.278189			Tissue-type plasminogen activator-like OS=Rattus norvegicus OX=10116 GN=LOC100910418 PE=4 SV=1	-2	0.966576			AP-3 complex subunit beta OS=Rattus norvegicus OX=10116 GN=Ap3b2 PE=1 SV=1	-0.139236	0.463167			Calcium load-activated calcium channel OS=Rattus norvegicus OX=10116 GN=Tmco1 PE=2 SV=1	-2.39593	0.458824
	Disks large homolog 1 OS=Rattus norvegicus OX=10116 GN=Dlg1 PE=1 SV=1	-0.736966	0.238072			Gasdermin A OS=Rattus norvegicus OX=10116 GN=Gsdma PE=3 SV=1	-2	1.2321			Disks large-associated protein 1 OS=Rattus norvegicus OX=10116 GN=Dlgap1 PE=1 SV=1	-0.828793	0.422012			Tubulin alpha chain OS=Rattus norvegicus OX=10116 GN=Tubal3 PE=1 SV=2	-2.35107	0.237323
	Glutamate receptor OS=Rattus norvegicus OX=10116 GN=Grin1 PE=1 SV=1	-0.862496	1.27246			Septin-2 OS=Rattus norvegicus OX=10116 GN=Septin2 PE=1 SV=1	-1.94342	0.41005			Potassium voltage-gated channel subfamily A member 4 OS=Rattus norvegicus OX=10116 GN=Kcna4 PE=1 SV=1	0.78157	0.141539			Gap junction alpha-1 protein OS=Rattus norvegicus OX=10116 GN=Gja1 PE=1 SV=2	-2.32916	1.32857
	Protein kinase C alpha type OS=Rattus norvegicus OX=10116 GN=Prkca PE=1 SV=3	-1.05889	1.49757			Caprin-1 OS=Rattus norvegicus OX=10116 GN=Caprin1 PE=1 SV=1	-1.94342	1.27737			Glutamate receptor ionotropic, NMDA 2A OS=Rattus norvegicus OX=10116 GN=Grin2a PE=1 SV=2	-0.668868	0.760473			Unconventional myosin-6 OS=Rattus norvegicus OX=10116 GN=Myo6 PE=1 SV=3	-2.27928	1.3245
	SH3 and multiple ankyrin repeat domains protein 1 OS=Rattus norvegicus OX=10116 GN=Shank1 PE=1 SV=1	-0.599462	0.939302			2-lysophosphatidate phosphatase PLPPR4 OS=Rattus norvegicus OX=10116 GN=Plppr4 PE=1 SV=1	-1.88897	0.777284			Protein piccolo OS=Rattus norvegicus OX=10116 GN=Pclo PE=1 SV=3	0.530071	0.200545			Synaptopodin OS=Rattus norvegicus OX=10116 GN=Synpo PE=1 SV=1	-2.20423	1.32857
	Mitogen-activated protein kinase 1 OS=Rattus norvegicus OX=10116 GN=Mapk1 PE=1 SV=3	-0.340075	0.310691			Fragile X mental retardation syndrome-related protein 1 OS=Rattus norvegicus OX=10116 GN=Fxr1 PE=1 SV=1	-1.88897	1.1343			Guanylate cyclase soluble subunit beta-1 OS=Rattus norvegicus OX=10116 GN=Gucy1b1 PE=1 SV=2	-0.365871	0.406567			Alpha-actinin-4 OS=Rattus norvegicus OX=10116 GN=Actn4 PE=1 SV=1	-2.17788	0.363379
	Cyclin-dependent kinase-like 5 OS=Rattus norvegicus OX=10116 GN=Cdkl5 PE=1 SV=2	-0.152003	0.19044			Pre-B-cell leukemia transcription factor-interacting protein 1 OS=Rattus norvegicus OX=10116 GN=Pbxip1 PE=1 SV=1	-1.8365	0.600326			Integral membrane protein 2C OS=Rattus norvegicus OX=10116 GN=Itm2c PE=1 SV=1	-0.390245	0.535882			Serine/threonine-protein phosphatase 2B catalytic subunit alpha isoform OS=Rattus norvegicus OX=10116 GN=Ppp3ca PE=1 SV=1	-2.13924	0.807488
	Integral membrane protein 2C OS=Rattus norvegicus OX=10116 GN=Itm2c PE=1 SV=1	-0.321928	0.19044			Enhancer of mRNA-decapping protein 4 OS=Rattus norvegicus OX=10116 GN=Edc4 PE=1 SV=1	-1.78588	1.00174			Active breakpoint cluster region-related protein OS=Rattus norvegicus OX=10116 GN=Abr PE=1 SV=1	0.635987	0.463167			Liprin-alpha-3 OS=Rattus norvegicus OX=10116 GN=Ppfia3 PE=1 SV=2	-2.13289	0.760473
	Active breakpoint cluster region-related protein OS=Rattus norvegicus OX=10116 GN=Abr PE=1 SV=1	-0.0144996	0.0952845			ARP1 actin-related protein 1 homolog B (Yeast) OS=Rattus norvegicus OX=10116 GN=Actr1b PE=1 SV=1	-1.73697	0.320572			Microtubule-associated protein 1 A, isoform CRA_c OS=Rattus norvegicus OX=10116 GN=Map1a PE=1 SV=1	-0.33825	0.274864			LIM domain and actin-binding protein 1 OS=Rattus norvegicus OX=10116 GN=Lima1 PE=1 SV=2	-2.05889	0.683524
	Voltage-dependent calcium channel gamma-8 subunit OS=Rattus norvegicus OX=10116 GN=Cacng8 PE=1 SV=1	-0.621488	0.47237			Protein disulfide-isomerase A6 OS=Rattus norvegicus OX=10116 GN=Pdia6 PE=1 SV=1	-1.68966	0.262807			Diacylglycerol kinase iota OS=Rattus norvegicus OX=10116 GN=Dgki PE=1 SV=1	0.856787	0.0940628			Unconventional myosin-Ib OS=Rattus norvegicus OX=10116 GN=Myo1b PE=1 SV=1	-2.00578	0.807488
	Integral membrane protein 2B OS=Rattus norvegicus OX=10116 GN=Itm2b PE=1 SV=1	0.422233	0.338187			Sterol carrier protein 2 OS=Rattus norvegicus OX=10116 GN=Scp2 PE=1 SV=3	-1.68966	0.876148			Serine/threonine-protein phosphatase 2A 56 kDa regulatory subunit OS=Rattus norvegicus OX=10116 GN=Ppp2r5d PE=1 SV=2	0.504875	0.112903			Tight junction protein 2 OS=Rattus norvegicus OX=10116 GN=Tjp2 PE=1 SV=1	-1.96016	0.911161
	Serine/threonine-protein phosphatase 2A 56 kDa regulatory subunit OS=Rattus norvegicus OX=10116 GN=Ppp2r5d PE=1 SV=2	-0.184425	0.0428718			LIM and calponin homology domains 1 OS=Rattus norvegicus OX=10116 GN=Limch1 PE=1 SV=2	-1.64386	0.425969			Heterogeneous nuclear ribonucleoprotein K OS=Rattus norvegicus OX=10116 GN=Hnrnpk PE=1 SV=1	0.324235	0.385816			Neurabin-2 OS=Rattus norvegicus OX=10116 GN=Ppp1r9b PE=1 SV=1	-1.93236	1.04567
	Tripartite motif-containing protein 46 OS=Rattus norvegicus OX=10116 GN=Trim46 PE=1 SV=2	0.687061	0.709965			KH domain-containing, RNA-binding, signal transduction-associated protein 1 OS=Rattus norvegicus OX=10116 GN=Khdrbs1 PE=1 SV=1	-1.64386	0.578396			Guanylate cyclase soluble subunit alpha-2 OS=Rattus norvegicus OX=10116 GN=Gucy1a2 PE=1 SV=2	-0.210897	0.0922733			Keratin, type II cytoskeletal 1b OS=Rattus norvegicus OX=10116 GN=Krt77 PE=4 SV=1	-1.91594	0.0670788
	Diacylglycerol kinase zeta OS=Rattus norvegicus OX=10116 GN=Dgkz PE=1 SV=1	0.263034	0.172631			40S ribosomal protein S12 OS=Rattus norvegicus OX=10116 GN=Rps12 PE=1 SV=1	-1.64386	0.617983			Protein kinase C alpha type OS=Rattus norvegicus OX=10116 GN=Prkca PE=1 SV=3	-2.7084	0.268488			Ubiquitin-40S ribosomal protein S27a OS=Rattus norvegicus OX=10116 GN=Rps27a PE=1 SV=2	-1.86775	1.27558
	cAMP-dependent protein kinase type I-beta regulatory subunit OS=Rattus norvegicus OX=10116 GN=Prkar1b PE=3 SV=3	-0.0892673	0.0241089			Ras-specific guanine nucleotide-releasing factor 2 OS=Rattus norvegicus OX=10116 GN=Rasgrf2 PE=1 SV=1	-1.64386	1.14086			Integral membrane protein 2B OS=Rattus norvegicus OX=10116 GN=Itm2b PE=1 SV=1	0.674461	0.0546898			Kinesin-like protein OS=Rattus norvegicus OX=10116 GN=Kif5c PE=1 SV=1	-1.80591	0.943828
	Regulating synaptic membrane exocytosis protein 2 OS=Rattus norvegicus OX=10116 GN=Rims2 PE=1 SV=1	-0.286304	0.312471			Dystrobrevin OS=Rattus norvegicus OX=10116 GN=Dtna PE=1 SV=3	-1.59946	0.954677			Cyclin-dependent kinase-like 5 OS=Rattus norvegicus OX=10116 GN=Cdkl5 PE=1 SV=1	-0.818579	0.363379			Microtubule-associated protein 4 OS=Rattus norvegicus OX=10116 GN=Map4 PE=1 SV=1	-1.80591	0.848706
	Erythrocyte membrane protein band 4.1-like 3 OS=Rattus norvegicus OX=10116 GN=Epb41l3 PE=1 SV=1	0.176323	0.847712			Plasminogen activator inhibitor 1 RNA-binding protein OS=Rattus norvegicus OX=10116 GN=Serbp1 PE=1 SV=2	-1.55639	1.35164			SLIT-ROBO Rho GTPase-activating protein 3 OS=Rattus norvegicus OX=10116 GN=Srgap3 PE=1 SV=2	-0.58208	0.162329			Keratin, type II cytoskeletal 6A OS=Rattus norvegicus OX=10116 GN=Krt6a PE=1 SV=1	-1.80591	0.536674
	RNA-binding motif protein 26 OS=Rattus norvegicus OX=10116 GN=Rbm26 PE=1 SV=2	0.565597	0.238824			Hydroxymethylglutaryl-CoA lyase, mitochondrial OS=Rattus norvegicus OX=10116 GN=Hmgcl PE=2 SV=1	-1.51457	0.106793			Neurexin-2 OS=Rattus norvegicus OX=10116 GN=Nrxn2 PE=1 SV=3	-0.506353	0.12455			Metabotropic glutamate receptor 7 OS=Rattus norvegicus OX=10116 GN=Grm7 PE=1 SV=1	-1.75147	0.45955
	Sodium channel protein type 2 subunit alpha OS=Rattus norvegicus OX=10116 GN=Scn2a PE=1 SV=1	0.176323	0.0414361			Sphingosine-1-phosphate lyase 1 OS=Rattus norvegicus OX=10116 GN=Sgpl1 PE=2 SV=1	-1.51457	0.812479			Eukaryotic translation initiation factor 2 subunit 1 OS=Rattus norvegicus OX=10116 GN=Eif2s1 PE=1 SV=2	0.347099	0.133597			26S proteasome non-ATPase regulatory subunit 2 OS=Rattus norvegicus OX=10116 GN=Psmd2 PE=1 SV=1	-1.74662	0.308135
	Myeloid differentiation primary response gene 116, isoform CRA_a OS=Rattus norvegicus OX=10116 GN=Ppp1r15a PE=3 SV=1	-0.761213	0.0070049			Hepatic and glial cell adhesion molecule OS=Rattus norvegicus OX=10116 GN=Hepacam PE=1 SV=2	-1.51457	1.05948			Ankyrin repeat domain 24 OS=Rattus norvegicus OX=10116 GN=Ankrd24 PE=4 SV=1	-0.249822	0.537297			Regulating synaptic membrane exocytosis protein 1 OS=Rattus norvegicus OX=10116 GN=Rims1 PE=1 SV=1	-1.72261	0.363379
	cAMP-specific 3',5'-cyclic phosphodiesterase 4A OS=Rattus norvegicus OX=10116 GN=Pde4a PE=1 SV=1	0	0.117475			SH3 and multiple ankyrin repeat domains protein 2-like OS=Rattus norvegicus OX=10116 GN=LOC103690160 PE=1 SV=1	-1.51457	1.92812			Collagen alpha-1(XXVII) chain OS=Rattus norvegicus OX=10116 GN=Col27a1 PE=2 SV=1	0.133564	0.0265704			Mitochondrial pyruvate carrier 2 OS=Rattus norvegicus OX=10116 GN=Mpc2 PE=2 SV=1	-1.71312	0.216648
	Eukaryotic translation initiation factor 2 subunit 1 OS=Rattus norvegicus OX=10116 GN=Eif2s1 PE=1 SV=2	-0.358454	0.336299			Dephospho-CoA kinase domain-containing protein OS=Rattus norvegicus OX=10116 GN=Dcakd PE=2 SV=1	-1.47393	0.133713								RIKEN cDNA 4933403O08 gene OS=Rattus norvegicus OX=10116 GN=4933403O08Rik PE=4 SV=3	-1.69432	0.811161
						Granszyme B-like 1 OS=Rattus norvegicus OX=10116 GN=Gzmbl1 PE=4 SV=1	-1.47393	0.954677								Contactin-1 OS=Rattus norvegicus OX=10116 GN=Cntn1 PE=1 SV=2	-1.6529	0.992072
						NHS-like 1 OS=Rattus norvegicus OX=10116 GN=Nhsl1 PE=3 SV=1	-1.4344	0.272459								Sorbin and SH3 domain-containing protein 1 OS=Rattus norvegicus OX=10116 GN=Sorbs1 PE=1 SV=1	-1.63487	0.487327
						F-box/SPRY domain-containing protein 1 (Fragment) OS=Rattus norvegicus OX=10116 GN=Fbxo45 PE=3 SV=1	-1.4344	0.310691								Coatomer subunit alpha OS=Rattus norvegicus OX=10116 GN=Copa PE=1 SV=1	-1.63039	0.475752
						Disks large-associated protein 2 OS=Rattus norvegicus OX=10116 GN=Dlgap2 PE=1 SV=3	-1.4344	0.869666								60S ribosomal protein L4 OS=Rattus norvegicus OX=10116 GN=Rpl4 PE=1 SV=1	-1.63039	0.347133
						Dystonin OS=Rattus norvegicus OX=10116 GN=Dst PE=1 SV=3	-1.39593	1.07727								Target of myb1-like 2 membrane-trafficking protein OS=Rattus norvegicus OX=10116 GN=Tom1l2 PE=1 SV=1	-1.62593	1.3245
						60S ribosomal protein L22 OS=Rattus norvegicus OX=10116 GN=LOC100360057 PE=1 SV=1	-1.35845	1.2321								Brain-specific angiogenesis inhibitor 1-associated protein 2 OS=Rattus norvegicus OX=10116 GN=Baiap2 PE=1 SV=1	-1.62149	0.811141
						Plectin OS=Rattus norvegicus OX=10116 GN=Plec PE=1 SV=1	-1.32193	1.32975								Diacylglycerol kinase OS=Rattus norvegicus OX=10116 GN=Dgkb PE=1 SV=2	-1.60823	0.537297
						RING-type E3 ubiquitin transferase OS=Rattus norvegicus OX=10116 GN=Trim21 PE=1 SV=2	-1.2863	0.288193								F-actin-capping protein subunit alpha-1 OS=Rattus norvegicus OX=10116 GN=Capza1 PE=1 SV=1	-1.5951	0.76573
						2',3'-cyclic-nucleotide 3'-phosphodiesterase OS=Rattus norvegicus OX=10116 GN=Cnp PE=1 SV=2	-1.2863	0.625252								RCG54282 OS=Rattus norvegicus OX=10116 GN=Sipa1l3 PE=1 SV=3	-1.5951	0.483419
						Ataxin 2-like OS=Rattus norvegicus OX=10116 GN=Atxn2l PE=1 SV=1	-1.2863	0.838632								Complement component C9 OS=Rattus norvegicus OX=10116 GN=C9 PE=1 SV=1	-1.58208	0.782356
						Capping protein-inhibiting regulator of actin dynamics OS=Rattus norvegicus OX=10116 GN=RGD1311575 PE=1 SV=3	-1.2863	0.841638								Plectin OS=Rattus norvegicus OX=10116 GN=Plec PE=1 SV=1	-1.58208	0.760473
						Nuclear factor 1 OS=Rattus norvegicus OX=10116 GN=Nf1x PE=1 SV=1	-1.2863	0.896196								Unconventional myosin-Va OS=Rattus norvegicus OX=10116 GN=Myo5a PE=1 SV=1	-1.57777	0.76073
						Ras homolog family member C OS=Rattus norvegicus OX=10116 GN=Rhoc PE=1 SV=1	-1.2863	1.28735								E3 ubiquitin protein ligase OS=Rattus norvegicus OX=10116 GN=Rnf20 PE=1 SV=1	-1.56918	0.745604
						Enzymatic glycosylation-regulating gene protein OS=Rattus norvegicus OX=10116 GN=Gcnt1 PE=2 SV=1	-1.25154	1.25259								Unconventional myosin-Va OS=Rattus norvegicus OX=10116 GN=Myo5a PE=1 SV=1	-1.54793	1.3245
						40S ribosomal protein S16 OS=Rattus norvegicus OX=10116 GN=Rps16 PE=1 SV=2	-1.25154	1.37986								Sideroflexin-5 OS=Rattus norvegicus OX=10116 GN=Sfxn5 PE=2 SV=1	-1.54793	0.580207
						Neurosecretory protein VGF OS=Rattus norvegicus OX=10116 GN=Vgf PE=1 SV=3	-1.21759	1.38405								40S ribosomal protein S9 OS=Rattus norvegicus OX=10116 GN=Rps9 PE=1 SV=4	-1.53116	0.299211
						Leucine zipper protein 1 OS=Rattus norvegicus OX=10116 GN=Luzp1 PE=1 SV=1	-1.21759	2.16178								Ankyrin repeat and sterile alpha motif domain-containing protein 1B OS=Rattus norvegicus OX=10116 GN=Anks1b PE=1 SV=3	-1.51046	0.594215
						Rho GTPase-activating protein 23 OS=Rattus norvegicus OX=10116 GN=Arhgap23 PE=1 SV=3	-1.18442	0.493495								DnaJ (Hsp40) homolog, subfamily A, member 2 OS=Rattus norvegicus OX=10116 GN=Dnaja2 PE=1 SV=1	-1.50635	0.672373
						Eukaryotic translation initiation factor 4 gamma, 3 OS=Rattus norvegicus OX=10116 GN=Eif4g3 PE=1 SV=1	-1.18442	0.752027								Disks large-associated protein 2 OS=Rattus norvegicus OX=10116 GN=Dlgap2 PE=1 SV=3	-1.50226	0.974566
						Brain-enriched guanylate kinase-associated protein OS=Rattus norvegicus OX=10116 GN=Begain PE=1 SV=1	-1.18442	0.876148								Glutamate receptor OS=Rattus norvegicus OX=10116 GN=Gria2 PE=3 SV=2	-1.486	0.368292
						Heparan sulfate 2-O-sulfotransferase 1 OS=Rattus norvegicus OX=10116 GN=Hs2st1 PE=1 SV=1	-1.18442	0.978811								Coiled-coil-helix-coiled-coil-helix domain containing 3 (Predicted), isoform CRA_a OS=Rattus norvegicus OX=10116 GN=Chchd3 PE=1 SV=1	-1.486	0.274864
						Family with sequence similarity 120A OS=Rattus norvegicus OX=10116 GN=Fam120a PE=1 SV=2	-1.18442	1.2815								40S ribosomal protein S6 OS=Rattus norvegicus OX=10116 GN=Rps6 PE=1 SV=1	-1.48197	0.495602
						DDB1 and CUL4-associated factor 7 OS=Rattus norvegicus OX=10116 GN=Dcaf7 PE=1 SV=1	-1.152	0.876148								AMP deaminase 2 OS=Rattus norvegicus OX=10116 GN=Ampd2 PE=1 SV=2	-1.47794	1.3245
						G kinase-anchoring protein 1 OS=Rattus norvegicus OX=10116 GN=Gkap1 PE=1 SV=1	-1.152	1.49757								SH3 and multiple ankyrin repeat domains protein 3 OS=Rattus norvegicus OX=10116 GN=Shank3 PE=1 SV=3	-1.45008	0.484836
						Serine/threonine-protein kinase MARK1 OS=Rattus norvegicus OX=10116 GN=Mark1 PE=1 SV=1	-1.12029	0.106793								Glutamine synthetase OS=Rattus norvegicus OX=10116 GN=Glul PE=1 SV=3	-1.43831	0.280094
						Brain-specific angiogenesis inhibitor 1-associated protein 2 OS=Rattus norvegicus OX=10116 GN=Baiap2 PE=1 SV=1	-1.12029	0.642065								Plectin OS=Rattus norvegicus OX=10116 GN=Plec PE=1 SV=1	-1.42663	0.848706
						40S ribosomal protein S25 OS=Rattus norvegicus OX=10116 PE=3 SV=1	-1.12029	1.1343								Homer protein homolog 3 OS=Rattus norvegicus OX=10116 GN=Homer3 PE=1 SV=2	-1.40736	0.734657
						Sequestosome-1 OS=Rattus norvegicus OX=10116 GN=Sqstm1 PE=1 SV=1	-1.08927	0.393619								Rho GTPase-activating protein 21 OS=Rattus norvegicus OX=10116 GN=Arhgap21 PE=1 SV=3	-1.38836	0.724111
						Neuroligin-2 OS=Rattus norvegicus OX=10116 GN=Nlgn2 PE=1 SV=3	-1.08927	0.551294								Jouberin OS=Rattus norvegicus OX=10116 GN=Ahi1 PE=1 SV=2	-1.38082	1.10278
						Limbic system-associated membrane protein OS=Rattus norvegicus OX=10116 GN=Lsamp PE=4 SV=1	-1.08927	0.585027								60S ribosomal protein L27 OS=Rattus norvegicus OX=10116 GN=Rpl27 PE=2 SV=2	-1.38082	0.571387
						Calreticulin OS=Rattus norvegicus OX=10116 GN=Calr PE=1 SV=1	-1.08927	0.657577								Kinesin-like protein KIF2A OS=Rattus norvegicus OX=10116 GN=Kif2a PE=1 SV=2	-1.37707	0.587036
						Myosin regulatory light chain RLC-A OS=Rattus norvegicus OX=10116 GN=Rlc-a PE=2 SV=2	-1.08927	0.943095								Prickle planar cell polarity protein 2 OS=Rattus norvegicus OX=10116 GN=Prickle2 PE=1 SV=2	-1.37333	0.363138
						UMP-CMP kinase OS=Rattus norvegicus OX=10116 GN=Cmpk1 PE=1 SV=1	-1.08927	0.966576								Transcription intermediary factor 1-beta OS=Rattus norvegicus OX=10116 GN=Trim28 PE=1 SV=2	-1.37333	0.35313
						Tropomyosin alpha-1 chain OS=Rattus norvegicus OX=10116 GN=Tpm1 PE=1 SV=3	-1.08927	1.15802								NADH dehydrogenase [ubiquinone] 1 alpha subcomplex subunit 9, mitochondrial OS=Rattus norvegicus OX=10116 GN=Ndufa9 PE=1 SV=2	-1.3474	0.37298
						Secretory carrier-associated membrane protein 5 OS=Rattus norvegicus OX=10116 GN=Scamp5 PE=2 SV=1	-1.08927	1.21896								Calcium-transporting ATPase OS=Rattus norvegicus OX=10116 GN=Atp2b3 PE=1 SV=1	-1.33643	0.756129
						Kinectin 1 OS=Rattus norvegicus OX=10116 GN=Ktn1 PE=1 SV=2	-1.08927	1.27737								Alpha-internexin OS=Rattus norvegicus OX=10116 GN=Ina PE=1 SV=2	-1.33279	1.27558
						Synaptopodin OS=Rattus norvegicus OX=10116 GN=Synpo PE=1 SV=1	-1.08927	1.67366								Myosin, heavy polypeptide 9, non-muscle OS=Rattus norvegicus OX=10116 GN=Myh9 PE=1 SV=1	-1.32916	0.85024
						Glycine--tRNA ligase OS=Rattus norvegicus OX=10116 GN=Gars1 PE=1 SV=2	-1.05889	0.0105502								Conserved oligomeric Golgi complex subunit 5 OS=Rattus norvegicus OX=10116 GN=Cog5 PE=1 SV=1	-1.32554	0.633846
						Importin subunit beta-1 OS=Rattus norvegicus OX=10116 GN=Kpnb1 PE=1 SV=1	-1.05889	0.206908								60S ribosomal protein L13 OS=Rattus norvegicus OX=10116 GN=Rpl13 PE=1 SV=2	-1.32554	0.00442659
						Spermatogenesis-associated, serine-rich 2 OS=Rattus norvegicus OX=10116 GN=Spats2 PE=1 SV=2	-1.05889	0.402305								Serine/threonine-protein kinase BRSK1 OS=Rattus norvegicus OX=10116 GN=Brsk1 PE=1 SV=1	-1.32193	0.55478
						V-type proton ATPase subunit OS=Rattus norvegicus OX=10116 GN=Atp6v0d1 PE=1 SV=1	-1.05889	0.460924								Serine/threonine-protein phosphatase PP1-gamma catalytic subunit OS=Rattus norvegicus OX=10116 GN=Ppp1cc PE=1 SV=1	-1.31833	0.943828
						Phospholipid-transporting ATPase OS=Rattus norvegicus OX=10116 GN=Atp9a PE=1 SV=2	-1.05889	0.551294								Disks large-associated protein 4 OS=Rattus norvegicus OX=10116 GN=Dlgap4 PE=1 SV=1	-1.31833	0.760473
						40S ribosomal protein S15 OS=Rattus norvegicus OX=10116 GN=Rps15 PE=1 SV=2	-1.05889	0.563837								BAG cochaperone 2 OS=Rattus norvegicus OX=10116 GN=Bag2 PE=4 SV=2	-1.31473	0.584445
						DNA topoisomerase OS=Rattus norvegicus OX=10116 GN=Top3b PE=1 SV=1	-1.05889	0.841638								Dynactin subunit 1 OS=Rattus norvegicus OX=10116 GN=Dctn1 PE=1 SV=2	-1.30757	0.190627
						Carnitine O-palmitoyltransferase 1, liver isoform OS=Rattus norvegicus OX=10116 GN=Cpt1a PE=1 SV=2	-1.05889	0.91364								60S ribosomal protein L7 OS=Rattus norvegicus OX=10116 GN=Rpl7 PE=1 SV=1	-1.30401	0.848706
						Ribosome-binding protein 1 OS=Rattus norvegicus OX=10116 GN=Rrbp1 PE=1 SV=3	-1.05889	1.53313								SH3 and multiple ankyrin repeat domains protein 2 OS=Rattus norvegicus OX=10116 GN=Shank2 PE=1 SV=2	-1.30401	0.771053
						Myosin, heavy polypeptide 9, non-muscle OS=Rattus norvegicus OX=10116 GN=Myh9 PE=1 SV=1	-1.05889	2.13906								Coronin OS=Rattus norvegicus OX=10116 GN=Coro2b PE=3 SV=3	-1.30045	1.02907
						Signal recognition particle subunit SRP72 OS=Rattus norvegicus OX=10116 GN=LOC108348180 PE=1 SV=2	-1.02915	0.383								LIM domain 7 OS=Rattus norvegicus OX=10116 GN=Lmo7 PE=1 SV=1	-1.30045	0.306501
						Protein kinase C gamma type OS=Rattus norvegicus OX=10116 GN=Prkcg PE=1 SV=1	-1.02915	0.8041								Non-specific serine/threonine protein kinase OS=Rattus norvegicus OX=10116 GN=Mark4 PE=3 SV=1	-1.29336	0.168791
						40S ribosomal protein S20 OS=Rattus norvegicus OX=10116 PE=1 SV=1	-1.02915	1.284								Alpha-internexin OS=Rattus norvegicus OX=10116 GN=Ina PE=1 SV=1	-1.28279	1.06418
						G3BP stress granule assembly factor 2 OS=Rattus norvegicus OX=10116 GN=G3bp2 PE=1 SV=1	-1.02915	1.33536								Ubiquitinyl hydrolase 1 OS=Rattus norvegicus OX=10116 GN=Usp9x PE=1 SV=1	-1.2723	0.943828
						PDZ and LIM domain protein 5 OS=Rattus norvegicus OX=10116 GN=Pdlim5 PE=1 SV=2	-1.02915	1.65561								Amyloid beta (A4) protein-binding, family A, member 1, isoform CRA_a OS=Rattus norvegicus OX=10116 GN=Apba1 PE=1 SV=2	-1.26188	0.782356
						40S ribosomal protein S5 OS=Rattus norvegicus OX=10116 GN=Rps5 PE=1 SV=1	-1.02915	1.67985								Serine/threonine-protein phosphatase PP1-alpha catalytic subunit OS=Rattus norvegicus OX=10116 GN=Ppp1ca PE=1 SV=1	-1.25843	0.399671
						SLIT-ROBO Rho GTPase-activating protein 1 OS=Rattus norvegicus OX=10116 GN=Srgap1 PE=1 SV=2	-1.02915	1.74958								Protocadherin-8 OS=Rattus norvegicus OX=10116 GN=Pcdh8 PE=1 SV=2	-1.25498	0.631876
						40S ribosomal protein S18 OS=Rattus norvegicus OX=10116 PE=3 SV=3	-1.02915	1.77469								ATP-dependent 6-phosphofructokinase, liver type OS=Rattus norvegicus OX=10116 GN=Pfkl PE=1 SV=3	-1.24127	0.242735
						Ankyrin repeat and sterile alpha motif domain-containing protein 1B OS=Rattus norvegicus OX=10116 GN=Anks1b PE=1 SV=3	-1	0.00744648								PTPRF-interacting protein alpha 2 OS=Rattus norvegicus OX=10116 GN=Ppfia2 PE=1 SV=2	-1.23107	0.463167
						Alpha-actinin-1 OS=Rattus norvegicus OX=10116 GN=Actn1 PE=1 SV=1	-1	0.841638								Homer protein homolog 1 OS=Rattus norvegicus OX=10116 GN=Homer1 PE=1 SV=2	-1.22769	0.760473
						Contactin-1 OS=Rattus norvegicus OX=10116 GN=Cntn1 PE=1 SV=2	-1	0.876148								Dynein light intermediate chain OS=Rattus norvegicus OX=10116 GN=Dync1li1 PE=1 SV=1	-1.22095	0.698604
						Glycogen synthase kinase-3 beta OS=Rattus norvegicus OX=10116 GN=Gsk3b PE=1 SV=1	-0.971431	0.153045								Phospholipid phosphatase-related protein type 4 OS=Rattus norvegicus OX=10116 GN=Plppr4 PE=1 SV=1	-1.21759	0.722702
						Proteasome subunit alpha type OS=Rattus norvegicus OX=10116 GN=Psma8 PE=3 SV=2	-0.971431	0.617983								Peripheral plasma membrane protein CASK OS=Rattus norvegicus OX=10116 GN=LOC100910506 PE=1 SV=1	-1.20756	1.3245
						60S ribosomal protein L35 OS=Rattus norvegicus OX=10116 GN=Rpl35 PE=1 SV=3	-0.971431	0.939302								Glycine--tRNA ligase OS=Rattus norvegicus OX=10116 GN=Gars1 PE=1 SV=2	-1.19429	0.134397
						Very-long-chain 3-oxoacyl-CoA reductase OS=Rattus norvegicus OX=10116 GN=Hsd17b12 PE=2 SV=1	-0.971431	0.974694								Neurofilament light polypeptide OS=Rattus norvegicus OX=10116 GN=Nefl PE=1 SV=3	-1.18771	0.756145
						Synaptic vesicle glycoprotein 2B OS=Rattus norvegicus OX=10116 GN=Sv2b PE=1 SV=1	-0.971431	0.982967								Ras-related protein Rab-14 OS=Rattus norvegicus OX=10116 GN=Rab14 PE=1 SV=1	-1.18771	0.275825
						Ras-specific guanine nucleotide-releasing factor 1 OS=Rattus norvegicus OX=10116 GN=Rasgrf1 PE=1 SV=1	-0.971431	0.995679								Copine-7 OS=Rattus norvegicus OX=10116 GN=Cpne7 PE=1 SV=1	-1.17788	0.66151
						40S ribosomal protein S15a OS=Rattus norvegicus OX=10116 GN=Rps15a PE=1 SV=2	-0.971431	1.07366								FERM_C domain-containing protein OS=Rattus norvegicus OX=10116 PE=1 SV=1	-1.17137	0.368551
						Filamin A OS=Rattus norvegicus OX=10116 GN=Flna PE=1 SV=1	-0.971431	1.08778								GTP-binding protein Rheb OS=Rattus norvegicus OX=10116 GN=Rheb PE=1 SV=2	-1.16488	0.102122
						Liprin-alpha-3 OS=Rattus norvegicus OX=10116 GN=Ppfia3 PE=1 SV=2	-0.943416	0.171985								60S ribosomal protein L19 OS=Rattus norvegicus OX=10116 GN=Rpl19 PE=1 SV=1	-1.152	0.401967
						Membrane-associated progesterone receptor component 1 OS=Rattus norvegicus OX=10116 GN=Pgrmc1 PE=1 SV=3	-0.943416	0.468521								LPS-responsive beige-like anchor protein OS=Rattus norvegicus OX=10116 GN=Lrba PE=1 SV=1	-1.14561	0.639408
						Eukaryotic translation initiation factor 5A-1 OS=Rattus norvegicus OX=10116 GN=Eif5a PE=1 SV=3	-0.943416	0.481486								ATPase WRNIP1 OS=Rattus norvegicus OX=10116 GN=Wrnip1 PE=1 SV=1	-1.13924	0.745604
						BAG cochaperone 2 OS=Rattus norvegicus OX=10116 GN=Bag2 PE=4 SV=2	-0.943416	0.90309								Disks large-associated protein 2 OS=Rattus norvegicus OX=10116 GN=Dlgap2 PE=1 SV=3	-1.13606	0.708283
						Supervillin OS=Rattus norvegicus OX=10116 GN=Svil PE=1 SV=3	-0.943416	1.15989								Programmed cell death 6-interacting protein OS=Rattus norvegicus OX=10116 GN=Pdcd6ip PE=1 SV=1	-1.13289	0.530603
						GTP-binding protein Rheb OS=Rattus norvegicus OX=10116 GN=Rheb PE=1 SV=1	-0.915936	0.272459								Ankycorbin OS=Rattus norvegicus OX=10116 GN=Rai14 PE=1 SV=2	-1.12343	0.969417
						Capping protein, Arp2/3 and myosin-I linker protein 3 OS=Rattus norvegicus OX=10116 GN=Carmil3 PE=3 SV=1	-0.915936	0.336299								Long-chain-fatty-acid--CoA ligase ACSBG1 OS=Rattus norvegicus OX=10116 GN=Acsbg1 PE=1 SV=1	-1.12343	0.686405
						Isocitrate dehydrogenase [NADP], mitochondrial OS=Rattus norvegicus OX=10116 GN=Idh2 PE=1 SV=2	-0.915936	0.372634								Reticulocalbin 1 OS=Rattus norvegicus OX=10116 GN=Rcn1 PE=1 SV=1	-1.12029	1.27558
						Malate dehydrogenase, mitochondrial OS=Rattus norvegicus OX=10116 GN=Mdh2 PE=1 SV=2	-0.915936	0.489455								Sphingosine-1-phosphate lyase 1 OS=Rattus norvegicus OX=10116 GN=Sgpl1 PE=2 SV=1	-1.12029	0.588
						Mesoderm-specific transcript homolog protein OS=Rattus norvegicus OX=10116 GN=Mest PE=1 SV=2	-0.915936	0.737549								NT-3 growth factor receptor OS=Rattus norvegicus OX=10116 GN=Ntrk3 PE=1 SV=2	-1.11092	1.06418
						Aly/REF export factor OS=Rattus norvegicus OX=10116 GN=Alyref PE=1 SV=1	-0.915936	0.974694								Interferon-inducible double-stranded RNA-dependent protein kinase activator A OS=Rattus norvegicus OX=10116 GN=Prkra PE=1 SV=1	-1.1016	0.339194
						60S ribosomal protein L36 OS=Rattus norvegicus OX=10116 GN=Rpl36 PE=3 SV=1	-0.915936	0.978811								60S ribosomal protein L13a OS=Rattus norvegicus OX=10116 GN=Rpl13a PE=1 SV=1	-1.09851	0.807488
						RALY heterogeneous nuclear ribonucleoprotein OS=Rattus norvegicus OX=10116 GN=Raly PE=1 SV=1	-0.915936	1.07727								Calnexin OS=Rattus norvegicus OX=10116 GN=Canx PE=1 SV=1	-1.09234	0.537297
						DEAD box protein 5 OS=Rattus norvegicus OX=10116 GN=Ddx5 PE=1 SV=1	-0.915936	1.14813								Phospholipid-transporting ATPase OS=Rattus norvegicus OX=10116 GN=Atp9a PE=1 SV=2	-1.08314	0.463167
						Actinin alpha 2 OS=Rattus norvegicus OX=10116 GN=Actn2 PE=1 SV=1	-0.915936	1.67366								Protein transport protein Sec61 subunit alpha isoform 1 OS=Rattus norvegicus OX=10116 GN=Sec61a1 PE=2 SV=2	-1.074	0.730011
						RCG41580, isoform CRA_a OS=Rattus norvegicus OX=10116 GN=Rpl22l1 PE=2 SV=1	-0.888969	0.457175								Ubiquitin-like modifier-activating enzyme 1 OS=Rattus norvegicus OX=10116 GN=Uba1 PE=1 SV=1	-1.074	0.424731
						Amino acid transporter OS=Rattus norvegicus OX=10116 GN=Slc1a4 PE=1 SV=1	-0.888969	0.501689								Cadherin-2 OS=Rattus norvegicus OX=10116 GN=Cdh2 PE=1 SV=1	-1.06492	0.586385
						AP-2 complex subunit sigma OS=Rattus norvegicus OX=10116 GN=Ap2s1 PE=1 SV=1	-0.888969	1.02045								ADAM metallopeptidase domain 23 OS=Rattus norvegicus OX=10116 GN=Adam23 PE=4 SV=1	-1.0619	0.341958
						40S ribosomal protein S10 OS=Rattus norvegicus OX=10116 GN=Rps10 PE=2 SV=1	-0.888969	1.02826								Transketolase OS=Rattus norvegicus OX=10116 GN=Tkt PE=1 SV=1	-1.05289	0.491279
						Polyadenylate-binding protein 1 OS=Rattus norvegicus OX=10116 GN=Pabpc1 PE=1 SV=1	-0.888969	1.05948								Transforming protein RhoA OS=Rattus norvegicus OX=10116 GN=Rhoa PE=1 SV=1	-1.04097	0.677908
						EWS RNA-binding protein 1 OS=Rattus norvegicus OX=10116 GN=Ewsr1 PE=1 SV=1	-0.888969	1.07727								CB1 cannabinoid receptor-interacting protein 1 OS=Rattus norvegicus OX=10116 GN=Cnrip1 PE=1 SV=1	-1.04097	0.356691
						Similar to 60S ribosomal protein L23a OS=Rattus norvegicus OX=10116 GN=RGD1564606 PE=3 SV=1	-0.888969	1.27737								T-complex protein 1 subunit epsilon OS=Rattus norvegicus OX=10116 GN=Cct5 PE=1 SV=1	-1.03505	0.37298
						RCG54282 OS=Rattus norvegicus OX=10116 GN=Sipa1l3 PE=1 SV=3	-0.862496	0.844664								60S ribosomal protein L3 OS=Rattus norvegicus OX=10116 GN=Rpl3 PE=1 SV=3	-1.03505	0.279333
						RCR-type E3 ubiquitin transferase OS=Rattus norvegicus OX=10116 GN=Mycbp2 PE=1 SV=3	-0.862496	1.02228								Thioredoxin-related transmembrane protein 2 OS=Rattus norvegicus OX=10116 GN=Tmx2 PE=2 SV=1	-1.02621	0.296231
						PC4 and SFRS1 interacting protein 1 OS=Rattus norvegicus OX=10116 GN=Psip1 PE=1 SV=1	-0.862496	1.32975								Alpha N-catenin OS=Rattus norvegicus OX=10116 PE=1 SV=1	-1.02034	0.811461
						7-dehydrocholesterol reductase OS=Rattus norvegicus OX=10116 GN=Dhcr7 PE=1 SV=1	-0.836501	0.294136								LUC7-like 2 (S. cerevisiae) OS=Rattus norvegicus OX=10116 GN=Luc7l2 PE=1 SV=1	-1.0145	0.28692
						Long-chain fatty acid transport protein 1 OS=Rattus norvegicus OX=10116 GN=Slc27a1 PE=1 SV=1	-0.836501	0.341989								Very-long-chain enoyl-CoA reductase OS=Rattus norvegicus OX=10116 GN=Tecr PE=1 SV=1	-1.01159	0.760473
						Prohibitin 1 OS=Rattus norvegicus OX=10116 GN=Phb1 PE=1 SV=1	-0.836501	0.452225								Cyclin-dependent-like kinase 5 OS=Rattus norvegicus OX=10116 GN=Cdk5 PE=1 SV=1	-1.01159	0.171115
						Nuclear factor 1 OS=Rattus norvegicus OX=10116 GN=Nfia PE=1 SV=1	-0.836501	0.659556								Neuron-specific vesicular protein calcyon OS=Rattus norvegicus OX=10116 GN=Caly PE=1 SV=1	-1.00868	0.771053
						Heterogeneous nuclear ribonucleoprotein U-like 2 OS=Rattus norvegicus OX=10116 GN=Hnrnpul2 PE=1 SV=1	-0.836501	0.714443								Brain-enriched guanylate kinase-associated protein OS=Rattus norvegicus OX=10116 GN=Begain PE=1 SV=1	-0.994241	0.943828
						60S ribosomal protein L34 OS=Rattus norvegicus OX=10116 GN=Rpl34 PE=1 SV=1	-0.836501	0.970616								Dynamin-1 OS=Rattus norvegicus OX=10116 GN=Dnm1 PE=1 SV=2	-0.988504	0.43358
						Zinc finger CCCH-type-containing 7B OS=Rattus norvegicus OX=10116 GN=Zc3h7b PE=1 SV=1	-0.836501	1.05948								Polyadenylate-binding protein 1 OS=Rattus norvegicus OX=10116 GN=Pabpc1 PE=1 SV=1	-0.9771	0.112508
						60S ribosomal protein L29 OS=Rattus norvegicus OX=10116 GN=Rpl29 PE=1 SV=3	-0.836501	1.17393								60S ribosomal protein L14 OS=Rattus norvegicus OX=10116 GN=Rpl14 PE=1 SV=3	-0.974262	0.586802
						Erlin-2 OS=Rattus norvegicus OX=10116 GN=Erlin2 PE=1 SV=1	-0.836501	1.24109								Voltage-dependent anion-selective channel protein 1 OS=Rattus norvegicus OX=10116 GN=Vdac1 PE=1 SV=4	-0.974262	0.121928
						Tight junction protein 2 OS=Rattus norvegicus OX=10116 GN=Tjp2 PE=1 SV=1	-0.836501	1.8729								ADP-ribosylation factor 4 OS=Rattus norvegicus OX=10116 GN=Arf4 PE=2 SV=2	-0.962969	1.28226
						Ubiquitin carboxyl-terminal hydrolase 10 OS=Rattus norvegicus OX=10116 GN=Usp10 PE=1 SV=1	-0.810966	0.436519								Spectrin beta chain OS=Rattus norvegicus OX=10116 GN=Sptbn4 PE=1 SV=1	-0.96016	0.148583
						Homer protein homolog 1 OS=Rattus norvegicus OX=10116 GN=Homer1 PE=1 SV=2	-0.810966	0.514279								Peripheral plasma membrane protein CASK OS=Rattus norvegicus OX=10116 GN=Cask PE=1 SV=1	-0.957356	0.684199
						G-protein coupled receptor-associated sorting protein 1 OS=Rattus norvegicus OX=10116 GN=Gprasp1 PE=1 SV=1	-0.810966	1.15428								Protein transport protein Sec31A OS=Rattus norvegicus OX=10116 GN=Sec31a PE=1 SV=2	-0.951764	0.544835
						Microsomal glutathione S-transferase 3 OS=Rattus norvegicus OX=10116 GN=Mgst3 PE=1 SV=1	-0.785875	0.477556								GTP-binding nuclear protein Ran OS=Rattus norvegicus OX=10116 GN=Ran PE=1 SV=3	-0.943416	0.861918
						Collagen-binding protein OS=Rattus norvegicus OX=10116 GN=Serpinh1 PE=1 SV=1	-0.785875	0.853872								Dehydrogenase/reductase 7 OS=Rattus norvegicus OX=10116 GN=Dhrs7 PE=1 SV=3	-0.943416	0.37298
						40S ribosomal protein S19 OS=Rattus norvegicus OX=10116 GN=Rps19l2 PE=3 SV=1	-0.785875	0.987163								FERM, ARHGEF and pleckstrin domain-containing protein 1 OS=Rattus norvegicus OX=10116 GN=Farp1 PE=1 SV=2	-0.940645	0.363711
						Catechol-O-methyltransferase domain containing 1 (Predicted), isoform CRA_a OS=Rattus norvegicus OX=10116 GN=Comtd1 PE=1 SV=1	-0.785875	1.01412								Apolipoprotein D OS=Rattus norvegicus OX=10116 GN=Apod PE=3 SV=1	-0.937878	0.142304
						40S ribosomal protein S14 OS=Rattus norvegicus OX=10116 GN=LOC100911847 PE=1 SV=1	-0.785875	1.25259								ArfGAP with GTPase domain, ankyrin repeat and PH domain 3 OS=Rattus norvegicus OX=10116 GN=Agap3 PE=3 SV=1	-0.92139	0.943828
						Dynamin-1-like protein OS=Rattus norvegicus OX=10116 GN=Dnm1l PE=1 SV=1	-0.761213	0.29243								Intercellular adhesion molecule 5 OS=Rattus norvegicus OX=10116 GN=Icam5 PE=1 SV=1	-0.91866	0.771423
						Methionine--tRNA ligase, cytoplasmic OS=Rattus norvegicus OX=10116 GN=Mars PE=1 SV=1	-0.761213	0.425969								Tumor susceptibility gene 101 protein OS=Rattus norvegicus OX=10116 GN=Tsg101 PE=1 SV=1	-0.91866	0.292235
						Tubulin beta chain OS=Rattus norvegicus OX=10116 GN=Tubb6 PE=1 SV=1	-0.761213	0.841638								Adhesion G protein-coupled receptor B2 OS=Rattus norvegicus OX=10116 GN=Adgrb2 PE=1 SV=1	-0.915936	0.399573
						Polyadenylate-binding protein OS=Rattus norvegicus OX=10116 GN=Pabpc4 PE=1 SV=2	-0.761213	1.32975								Protein TANC2 OS=Rattus norvegicus OX=10116 GN=Tanc2 PE=1 SV=1	-0.905088	0.836941
						RCG62582, isoform CRA_c OS=Rattus norvegicus OX=10116 GN=Ubap2l PE=1 SV=1	-0.761213	1.63639								Surfeit locus protein 4 OS=Rattus norvegicus OX=10116 GN=Surf4 PE=1 SV=1	-0.899695	0.683524
						Protein SCAI OS=Rattus norvegicus OX=10116 GN=Scai PE=1 SV=2	-0.736966	0.135489								60S ribosomal protein L28 OS=Rattus norvegicus OX=10116 PE=3 SV=1	-0.897006	0.0940628
						RAB6B, member RAS oncogene family OS=Rattus norvegicus OX=10116 GN=Rab6b PE=4 SV=1	-0.736966	0.41005								Serine racemase OS=Rattus norvegicus OX=10116 GN=Srr PE=1 SV=1	-0.880976	0.394119
						Slc25a17 protein OS=Rattus norvegicus OX=10116 GN=Slc25a17 PE=1 SV=1	-0.736966	0.539102								Dihydropyrimidinase-related protein 3 OS=Rattus norvegicus OX=10116 GN=Dpysl3 PE=1 SV=2	-0.865122	0.164217
						Tudor domain-containing protein 3 OS=Rattus norvegicus OX=10116 GN=Tdrd3 PE=1 SV=1	-0.736966	0.673664								Alanine--tRNA ligase, cytoplasmic OS=Rattus norvegicus OX=10116 GN=Aars1 PE=1 SV=3	-0.862496	0.760473
						40S ribosomal protein S24 OS=Rattus norvegicus OX=10116 GN=Rps24 PE=3 SV=1	-0.736966	0.850781								Epoxide hydrolase 1 OS=Rattus norvegicus OX=10116 GN=Ephx1 PE=1 SV=1	-0.85726	0.463167
						Dihydropyrimidinase-related protein 2 OS=Rattus norvegicus OX=10116 GN=Dpysl2 PE=1 SV=1	-0.736966	0.943095								1-acyl-sn-glycerol-3-phosphate acyltransferase OS=Rattus norvegicus OX=10116 GN=Agpat1 PE=1 SV=1	-0.852042	0.694795
						Dynamin-1 OS=Rattus norvegicus OX=10116 GN=Dnm1 PE=1 SV=2	-0.736966	0.954677								Actinin alpha 2 OS=Rattus norvegicus OX=10116 GN=Actn2 PE=1 SV=1	-0.84944	0.836941
						Ac2-067 OS=Rattus norvegicus OX=10116 PE=2 SV=1	-0.736966	0.954677								Apolipoprotein E OS=Rattus norvegicus OX=10116 GN=Apoe PE=1 SV=2	-0.844251	0.389084
						Coactosin-like protein OS=Rattus norvegicus OX=10116 GN=Cotl1 PE=1 SV=1	-0.736966	0.978811								Nucleosome assembly protein 1-like 1 OS=Rattus norvegicus OX=10116 GN=Nap1l1 PE=1 SV=1	-0.83908	0.0539223
						60S ribosomal protein L31 OS=Rattus norvegicus OX=10116 GN=Rpl31 PE=2 SV=1	-0.736966	1.21968								Protein unc-13 homolog A OS=Rattus norvegicus OX=10116 GN=Unc13a PE=1 SV=1	-0.836501	0.268488
						40S ribosomal protein S13 OS=Rattus norvegicus OX=10116 GN=Rps13 PE=1 SV=2	-0.736966	1.74232								Fragile X mental retardation syndrome-related protein 1 OS=Rattus norvegicus OX=10116 GN=Fxr1 PE=1 SV=1	-0.833927	0.107219
						60S ribosomal protein L38 OS=Rattus norvegicus OX=10116 PE=3 SV=1	-0.713119	0.21254								Ig-like domain-containing protein OS=Rattus norvegicus OX=10116 PE=1 SV=1	-0.831358	0.518789
						Serine/threonine-protein kinase DCLK2 OS=Rattus norvegicus OX=10116 GN=Dclk2 PE=1 SV=3	-0.713119	0.375718								Calmodulin-regulated spectrin-associated protein family, member 3 OS=Rattus norvegicus OX=10116 GN=Camsap3 PE=1 SV=2	-0.831358	0.126869
						Proteasome subunit alpha type-3 OS=Rattus norvegicus OX=10116 GN=Psma3 PE=1 SV=3	-0.713119	0.527244								Disks large-associated protein 3 OS=Rattus norvegicus OX=10116 GN=Dlgap3 PE=1 SV=2	-0.828793	0.943828
						Synaptic functional regulator FMR1 OS=Rattus norvegicus OX=10116 GN=Fmr1 PE=1 SV=1	-0.713119	0.747147								Receptor-type tyrosine-protein phosphatase S OS=Rattus norvegicus OX=10116 GN=Ptprs PE=1 SV=2	-0.826233	0.30629
						Mannosyl-oligosaccharide glucosidase OS=Rattus norvegicus OX=10116 GN=Mogs PE=1 SV=1	-0.713119	0.917215								Aldehyde dehydrogenase, mitochondrial OS=Rattus norvegicus OX=10116 GN=Aldh2 PE=1 SV=1	-0.818579	0.268331
						2-phospho-D-glycerate hydro-lyase OS=Rattus norvegicus OX=10116 PE=3 SV=1	-0.713119	1.05257								Microtubule-actin cross-linking factor 1 OS=Rattus norvegicus OX=10116 GN=Macf1 PE=1 SV=1	-0.813499	0.829216
						40S ribosomal protein S8 OS=Rattus norvegicus OX=10116 GN=Rps8 PE=1 SV=2	-0.713119	1.67985								WD repeat-containing protein 1 OS=Rattus norvegicus OX=10116 GN=Wdr1 PE=1 SV=3	-0.803393	0.619949
						Protein RUFY3 OS=Rattus norvegicus OX=10116 GN=Rufy3 PE=1 SV=1	-0.68966	0.326058								Creatine kinase B-type OS=Rattus norvegicus OX=10116 GN=Ckb PE=1 SV=2	-0.803393	0.537297
						Proteasomal ubiquitin receptor ADRM1 OS=Rattus norvegicus OX=10116 GN=Adrm1 PE=1 SV=2	-0.68966	0.361511								Prohibitin OS=Rattus norvegicus OX=10116 GN=Phb2 PE=1 SV=1	-0.795859	0.0868325
						Rabphilin-3A OS=Rattus norvegicus OX=10116 GN=Rph3a PE=1 SV=1	-0.68966	0.543634								60S ribosomal protein L15 OS=Rattus norvegicus OX=10116 GN=Rpl15 PE=1 SV=2	-0.793357	0.228698
						Microtubule affinity-regulating kinase 4 OS=Rattus norvegicus OX=10116 GN=Mark4 PE=4 SV=1	-0.68966	0.55752								Adducin 1 (Alpha), isoform CRA_b OS=Rattus norvegicus OX=10116 GN=Add1 PE=1 SV=1	-0.790859	0.760473
						ATP synthase F1 subunit delta OS=Rattus norvegicus OX=10116 GN=Atp5f1d PE=1 SV=1	-0.68966	0.562249								Exocyst complex component Sec8 OS=Rattus norvegicus OX=10116 GN=Exoc4 PE=1 SV=2	-0.790859	0.148583
						Homer protein homolog 3 OS=Rattus norvegicus OX=10116 GN=Homer3 PE=1 SV=2	-0.68966	0.573489								Neurofilament medium polypeptide OS=Rattus norvegicus OX=10116 GN=Nefm PE=1 SV=4	-0.788365	0.756129
						Mitochondrial carnitine/acylcarnitine carrier protein OS=Rattus norvegicus OX=10116 GN=Slc25a20 PE=1 SV=1	-0.68966	0.600326								IQ motif and Sec7 domain ArfGEF 2 OS=Rattus norvegicus OX=10116 GN=Iqsec2 PE=1 SV=1	-0.788365	0.368551
						MAP7 domain-containing 1 OS=Rattus norvegicus OX=10116 GN=Map7d1 PE=1 SV=1	-0.68966	0.752027								Protein bassoon OS=Rattus norvegicus OX=10116 GN=Bsn PE=4 SV=1	-0.780909	0.105153
						Tumor suppressor candidate 3 OS=Rattus norvegicus OX=10116 GN=Tusc3 PE=1 SV=1	-0.68966	0.838632								Fascin OS=Rattus norvegicus OX=10116 GN=Fscn1 PE=1 SV=2	-0.778432	0.684199
						LSM12 homolog OS=Rattus norvegicus OX=10116 GN=Lsm12 PE=1 SV=1	-0.68966	0.899629								Ribosome-binding protein 1 OS=Rattus norvegicus OX=10116 GN=Rrbp1 PE=1 SV=3	-0.778432	0.476009
						Fatty acid-binding protein, brain OS=Rattus norvegicus OX=10116 GN=Fabp7 PE=1 SV=2	-0.68966	0.954677								Coronin OS=Rattus norvegicus OX=10116 GN=Coro2a PE=1 SV=1	-0.768568	0.744613
						Heterogeneous nuclear ribonucleoprotein U OS=Rattus norvegicus OX=10116 GN=Hnrnpu PE=1 SV=1	-0.68966	0.995679								Tropomodulin-2 OS=Rattus norvegicus OX=10116 GN=Tmod2 PE=1 SV=1	-0.761213	1.3245
						Alpha-internexin OS=Rattus norvegicus OX=10116 GN=Ina PE=1 SV=2	-0.68966	1.1296								Family with sequence similarity 120C OS=Rattus norvegicus OX=10116 GN=FAM120C PE=1 SV=1	-0.761213	0.134395
						60S ribosomal protein L27 OS=Rattus norvegicus OX=10116 GN=Rpl27 PE=2 SV=2	-0.68966	1.21968								Guanine nucleotide-binding protein G(q) subunit alpha OS=Rattus norvegicus OX=10116 GN=Gnaq PE=2 SV=2	-0.761213	0.0207496
						Alpha-internexin OS=Rattus norvegicus OX=10116 GN=Ina PE=1 SV=1	-0.68966	1.32975								Guanine nucleotide-binding protein G(i) subunit alpha-2 OS=Rattus norvegicus OX=10116 GN=Gnai2 PE=1 SV=3	-0.756331	0.135776
						40S ribosomal protein S3 OS=Rattus norvegicus OX=10116 GN=Rps3 PE=1 SV=1	-0.68966	1.4437								Alpha N-catenin OS=Rattus norvegicus OX=10116 GN=Ctnna2 PE=1 SV=3	-0.751465	0.126264
						40S ribosomal protein S23 OS=Rattus norvegicus OX=10116 GN=Rps23 PE=1 SV=3	-0.68966	1.66154								Actin, alpha skeletal muscle OS=Rattus norvegicus OX=10116 GN=Acta1 PE=1 SV=1	-0.749038	0.848706
						Complex I-20kD OS=Rattus norvegicus OX=10116 GN=Ndufs7 PE=1 SV=1	-0.666576	0.364516								60S ribosomal protein L8 OS=Rattus norvegicus OX=10116 GN=Rpl8 PE=2 SV=2	-0.749038	0.132981
						Heterogeneous nuclear ribonucleoprotein F OS=Rattus norvegicus OX=10116 GN=Hnrnpf PE=1 SV=3	-0.666576	0.616185								Double-stranded RNA-binding protein Staufen homolog 2 OS=Rattus norvegicus OX=10116 GN=Stau2 PE=1 SV=1	-0.749038	0.00342487
						Tripartite motif-containing 25 OS=Rattus norvegicus OX=10116 GN=Trim25 PE=1 SV=3	-0.666576	0.69037								Complement C5 (Fragment) OS=Rattus norvegicus OX=10116 GN=C5 PE=1 SV=1	-0.744197	0.126264
						Ubiquitin carboxyl-terminal hydrolase OS=Rattus norvegicus OX=10116 GN=Usp5 PE=1 SV=1	-0.666576	0.790485								RCG28460 OS=Rattus norvegicus OX=10116 GN=Wdr47 PE=1 SV=1	-0.739372	0.347733
						Fibroblast growth factor 13 OS=Rattus norvegicus OX=10116 GN=Fgf13 PE=1 SV=2	-0.666576	0.853872								Mitogen-activated protein kinase kinase kinase kinase 4 OS=Rattus norvegicus OX=10116 GN=Map4k4 PE=1 SV=1	-0.72977	0.370285
						Protein disulfide-isomerase OS=Rattus norvegicus OX=10116 GN=Pdia3 PE=1 SV=1	-0.666576	0.90309								HP domain-containing protein OS=Rattus norvegicus OX=10116 PE=1 SV=1	-0.72977	0.296231
						LIM domain and actin-binding protein 1 OS=Rattus norvegicus OX=10116 GN=Lima1 PE=1 SV=2	-0.666576	1.19382								Mitochondrial carrier 2 OS=Rattus norvegicus OX=10116 GN=Mtch2 PE=1 SV=1	-0.724993	0.0715768
						FERM domain-containing 4B OS=Rattus norvegicus OX=10116 GN=Frmd4b PE=1 SV=2	-0.666576	1.25964								Spermatogenesis-associated protein 20 OS=Rattus norvegicus OX=10116 GN=Spata20 PE=1 SV=1	-0.72261	0.588
						Guanine nucleotide-binding protein G(i) subunit alpha-1 OS=Rattus norvegicus OX=10116 GN=Gnai1 PE=1 SV=3	-0.643856	0.133122								Non-specific serine/threonine protein kinase OS=Rattus norvegicus OX=10116 GN=Csnk2a2 PE=1 SV=1	-0.72261	0.530603
						E3 ubiquitin-protein ligase TRIM9 OS=Rattus norvegicus OX=10116 GN=Trim9 PE=1 SV=1	-0.643856	0.392545								Nucleophosmin OS=Rattus norvegicus OX=10116 GN=Npm1 PE=1 SV=1	-0.720232	0.491279
						60S ribosomal protein L30 OS=Rattus norvegicus OX=10116 GN=Rpl30 PE=3 SV=2	-0.643856	0.659556								Disco-interacting protein 2 homolog B OS=Rattus norvegicus OX=10116 GN=Dip2b PE=1 SV=1	-0.715486	0.237323
						Nucleoside-diphosphate kinase OS=Rattus norvegicus OX=10116 PE=3 SV=1	-0.643856	0.681937								Huntingtin-associated protein 1 OS=Rattus norvegicus OX=10116 GN=Hap1 PE=1 SV=1	-0.713119	0.625047
						Ras-related protein Rab-6A OS=Rattus norvegicus OX=10116 GN=Rab6a PE=1 SV=2	-0.643856	0.730487								DNA polymerase delta-interacting protein 3 OS=Rattus norvegicus OX=10116 GN=Poldip3 PE=1 SV=1	-0.710756	0.249682
						Ras-related protein Rab-21 OS=Rattus norvegicus OX=10116 GN=Rab21 PE=2 SV=1	-0.643856	0.876148								Protein phosphatase 1 regulatory subunit OS=Rattus norvegicus OX=10116 GN=Ppp1r12b PE=1 SV=1	-0.708396	0.760473
						40S ribosomal protein S3a OS=Rattus norvegicus OX=10116 GN=Rps3a PE=1 SV=2	-0.643856	1.15058								Protein disulfide-isomerase OS=Rattus norvegicus OX=10116 GN=Pdia3 PE=1 SV=1	-0.706041	0.234054
						Target of myb1-like 2 membrane-trafficking protein OS=Rattus norvegicus OX=10116 GN=Tom1l2 PE=1 SV=1	-0.643856	1.21968								Actin-like protein 3 OS=Rattus norvegicus OX=10116 GN=Actr3 PE=1 SV=1	-0.701342	0.425546
						FMR1 autosomal homolog 2 OS=Rattus norvegicus OX=10116 GN=Fxr2 PE=1 SV=1	-0.643856	1.284								40S ribosomal protein S11 OS=Rattus norvegicus OX=10116 GN=Rps11 PE=1 SV=3	-0.701342	0.126264
						60S ribosomal protein L36a OS=Rattus norvegicus OX=10116 GN=Rpl36a PE=1 SV=2	-0.643856	1.34294								Multiple PDZ domain protein OS=Rattus norvegicus OX=10116 GN=Mpdz PE=1 SV=1	-0.696658	0.541959
						DExH-box helicase 57 OS=Rattus norvegicus OX=10116 GN=Dhx57 PE=4 SV=1	-0.621488	0.453457								Cytochrome b-c1 complex subunit Rieske, mitochondrial OS=Rattus norvegicus OX=10116 GN=Uqcrfs1 PE=1 SV=2	-0.696658	0.0939153
						RB-binding protein 4, chromatin-remodeling factor OS=Rattus norvegicus OX=10116 GN=Rbbp4 PE=1 SV=1	-0.621488	0.534617								Tropomyosin alpha-3 chain OS=Rattus norvegicus OX=10116 GN=Tpm3 PE=1 SV=2	-0.694321	0.756129
						Peptidyl-prolyl cis-trans isomerase OS=Rattus norvegicus OX=10116 GN=Pin1 PE=1 SV=1	-0.621488	0.539102								60S ribosomal protein L7a OS=Rattus norvegicus OX=10116 GN=LOC108349606 PE=3 SV=1	-0.685014	0.00645115
						Dolichyl-diphosphooligosaccharide--protein glycosyltransferase subunit 1 OS=Rattus norvegicus OX=10116 GN=Rpn1 PE=1 SV=1	-0.621488	0.730487								Myl6 protein OS=Rattus norvegicus OX=10116 GN=Myl6 PE=2 SV=1	-0.675765	0.760473
						60S ribosomal protein L14 OS=Rattus norvegicus OX=10116 GN=Rpl14 PE=1 SV=3	-0.621488	0.782516								Reticulon OS=Rattus norvegicus OX=10116 GN=Rtn3 PE=1 SV=1	-0.673463	0.475752
						Ras-related protein Rab-5A OS=Rattus norvegicus OX=10116 GN=Rab5a PE=2 SV=1	-0.621488	0.818156								Calmodulin-regulated spectrin-associated protein 2 OS=Rattus norvegicus OX=10116 GN=Camsap2 PE=1 SV=1	-0.671164	0.25528
						Thy-1 membrane glycoprotein OS=Rattus norvegicus OX=10116 GN=Thy1 PE=1 SV=1	-0.621488	0.924453								Glycogen synthase kinase-3 beta OS=Rattus norvegicus OX=10116 GN=Gsk3b PE=1 SV=1	-0.666576	0.149153
						40S ribosomal protein S7 OS=Rattus norvegicus OX=10116 GN=Rps7 PE=1 SV=1	-0.621488	1.21968								14-3-3 protein theta OS=Rattus norvegicus OX=10116 GN=Ywhaq PE=1 SV=1	-0.664288	0.268488
						Sideroflexin-5 OS=Rattus norvegicus OX=10116 GN=Sfxn5 PE=2 SV=1	-0.599462	0.150581								DnaJ homolog subfamily B member 6 OS=Rattus norvegicus OX=10116 GN=Dnajb6 PE=1 SV=1	-0.659723	0.578641
						Ras-related protein Rab-31 OS=Rattus norvegicus OX=10116 GN=Rab31 PE=1 SV=2	-0.599462	0.343902								60S ribosomal protein L35 OS=Rattus norvegicus OX=10116 PE=3 SV=1	-0.655172	0.18159
						Phospholipid-transporting ATPase OS=Rattus norvegicus OX=10116 GN=Atp10b PE=3 SV=1	-0.599462	0.349692								Serine/threonine-protein kinase DCLK1 OS=Rattus norvegicus OX=10116 GN=Dclk1 PE=1 SV=1	-0.648372	0.587036
						Beta-1,4-glucuronyltransferase 1 OS=Rattus norvegicus OX=10116 GN=B4gat1 PE=1 SV=1	-0.599462	0.455932								Myosin, heavy polypeptide 10, non-muscle, isoform CRA_b OS=Rattus norvegicus OX=10116 GN=Myh10 PE=1 SV=1	-0.639355	0.782356
						Dipeptidyl peptidase 2 OS=Rattus norvegicus OX=10116 GN=Dpp7 PE=1 SV=1	-0.599462	0.512862								Src substrate cortactin OS=Rattus norvegicus OX=10116 GN=Cttn PE=1 SV=1	-0.637109	0.617503
						Coiled-coil domain-containing protein 50 OS=Rattus norvegicus OX=10116 GN=Ccdc50 PE=2 SV=1	-0.599462	0.876148								MAP/microtubule affinity-regulating kinase 3 OS=Rattus norvegicus OX=10116 GN=Mark3 PE=1 SV=1	-0.637109	0.437316
						Microtubule-actin cross-linking factor 1 OS=Rattus norvegicus OX=10116 GN=Macf1 PE=1 SV=1	-0.599462	1.05948								AP-2 complex subunit mu OS=Rattus norvegicus OX=10116 GN=Ap2m1 PE=1 SV=1	-0.634867	0.215414
						Amino acid transporter OS=Rattus norvegicus OX=10116 GN=Slc1a3 PE=1 SV=1	-0.599462	1.07727								Very-long-chain (3R)-3-hydroxyacyl-CoA dehydratase OS=Rattus norvegicus OX=10116 GN=Hacd3 PE=1 SV=2	-0.628162	0.779355
						Putative 60S ribosomal protein L37a OS=Rattus norvegicus OX=10116 GN=Rpl37a-ps1 PE=5 SV=2	-0.599462	1.27737								Dihydropyrimidinase-related protein 1 OS=Rattus norvegicus OX=10116 GN=Crmp1 PE=1 SV=1	-0.628162	0.452941
						Cytoplasmic linker-associated protein 1 OS=Rattus norvegicus OX=10116 GN=Clasp1 PE=1 SV=3	-0.577767	0.154282								Guanine deaminase OS=Rattus norvegicus OX=10116 GN=Gda PE=1 SV=1	-0.62371	0.566891
						ATPase WRNIP1 OS=Rattus norvegicus OX=10116 GN=Wrnip1 PE=1 SV=1	-0.577767	0.229885								Glutathione peroxidase OS=Rattus norvegicus OX=10116 GN=Gpx3 PE=1 SV=1	-0.617056	0.38116
						Saccharopine dehydrogenase-like oxidoreductase OS=Rattus norvegicus OX=10116 GN=Sccpdh PE=1 SV=1	-0.577767	0.247952								Endoplasmin OS=Rattus norvegicus OX=10116 GN=Hsp90b1 PE=1 SV=2	-0.612637	0.738106
						Protocadherin 1 OS=Rattus norvegicus OX=10116 GN=Pcdh1 PE=1 SV=1	-0.577767	0.270835								Glutamyl-prolyl-tRNA synthetase OS=Rattus norvegicus OX=10116 GN=Eprs PE=1 SV=1	-0.612637	0.571387
						Casein kinase II subunit alpha OS=Rattus norvegicus OX=10116 GN=Csnk2a1 PE=1 SV=2	-0.577767	0.573489								Endoplasmic reticulum chaperone BiP OS=Rattus norvegicus OX=10116 GN=Hspa5 PE=1 SV=1	-0.610433	0.23914
						ADP-ribosylation factor 2 OS=Rattus norvegicus OX=10116 GN=Arf2 PE=2 SV=1	-0.577767	0.812479								DnaJ homolog subfamily A member 1 OS=Rattus norvegicus OX=10116 GN=Dnaja1 PE=1 SV=1	-0.606035	0.83707
						ERC protein 2 OS=Rattus norvegicus OX=10116 GN=Erc2 PE=1 SV=1	-0.577767	0.882729								RAB10, member RAS oncogene family OS=Rattus norvegicus OX=10116 GN=Rab10 PE=1 SV=1	-0.60165	0.974566
						Myosin light polypeptide 6 OS=Rattus norvegicus OX=10116 GN=Myl6 PE=1 SV=1	-0.577767	0.939302								SET-binding factor 1 OS=Rattus norvegicus OX=10116 GN=Sbf1 PE=1 SV=1	-0.592919	0.213754
						Casein kinase I isoform delta OS=Rattus norvegicus OX=10116 GN=Csnk1d PE=1 SV=2	-0.577767	0.939302								Ras-related protein Rap-1b OS=Rattus norvegicus OX=10116 GN=Rap1b PE=1 SV=2	-0.590745	0.537297
						Cytoplasmic FMR1-interacting protein OS=Rattus norvegicus OX=10116 GN=Cyfip1 PE=1 SV=1	-0.577767	0.954677								FLII, actin-remodeling protein OS=Rattus norvegicus OX=10116 GN=Flii PE=1 SV=1	-0.586406	0.401967
						Protein FAM98A OS=Rattus norvegicus OX=10116 GN=Fam98a PE=2 SV=1	-0.577767	1.0278								Actin, cytoplasmic 2 OS=Rattus norvegicus OX=10116 GN=Actg1 PE=1 SV=1	-0.573467	0.848706
						DCC-interacting protein 13-beta OS=Rattus norvegicus OX=10116 GN=Appl2 PE=2 SV=1	-0.577767	1.08725								Amino acid transporter OS=Rattus norvegicus OX=10116 GN=Slc1a3 PE=1 SV=1	-0.573467	0.613838
						40S ribosomal protein S2 OS=Rattus norvegicus OX=10116 GN=Rps2 PE=1 SV=1	-0.577767	1.17914								Crooked neck-like protein 1 OS=Rattus norvegicus OX=10116 GN=Crnkl1 PE=2 SV=1	-0.562772	0.493264
						L-lactate dehydrogenase B chain OS=Rattus norvegicus OX=10116 GN=Ldhb PE=1 SV=2	-0.577767	1.21681								GPI inositol-deacylase OS=Rattus norvegicus OX=10116 GN=Pgap1 PE=1 SV=1	-0.562772	0.38398
						60S ribosomal protein L27a OS=Rattus norvegicus OX=10116 GN=RGD1562402 PE=3 SV=1	-0.577767	1.61083								RCG48334, isoform CRA_e OS=Rattus norvegicus OX=10116 GN=Rbm14 PE=1 SV=1	-0.560643	0.3349
						Kinesin-like protein KIF2A OS=Rattus norvegicus OX=10116 GN=Kif2a PE=1 SV=2	-0.577767	1.77469								Actin-binding LIM protein family, member 3 OS=Rattus norvegicus OX=10116 GN=Ablim3 PE=1 SV=1	-0.556393	0.535882
						Phosphoserine aminotransferase OS=Rattus norvegicus OX=10116 GN=Psat1 PE=1 SV=1	-0.556393	0.278189								ATP-binding cassette sub-family A member 7 OS=Rattus norvegicus OX=10116 GN=Abca7 PE=1 SV=1	-0.556393	0.191686
						Bridging integrator 2 OS=Rattus norvegicus OX=10116 GN=Bin2 PE=1 SV=1	-0.556393	0.392545								1-acylglycerol-3-phosphate O-acyltransferase 3 OS=Rattus norvegicus OX=10116 GN=Agpat3 PE=1 SV=1	-0.552156	0.292235
						Nexilin OS=Rattus norvegicus OX=10116 GN=Nexn PE=1 SV=1	-0.556393	0.521434								F-actin-capping protein subunit alpha-2 OS=Rattus norvegicus OX=10116 GN=Capza2 PE=1 SV=1	-0.550043	0.544835
						SH3 and multiple ankyrin repeat domains protein 3 OS=Rattus norvegicus OX=10116 GN=Shank3 PE=1 SV=1	-0.556393	0.838632								Dynamin-2 OS=Rattus norvegicus OX=10116 GN=Dnm2 PE=1 SV=1	-0.545824	0.974566
						Exocyst complex component 1 OS=Rattus norvegicus OX=10116 GN=Exoc1 PE=1 SV=3	-0.556393	0.863279								Sorting and assembly machinery component 50 homolog OS=Rattus norvegicus OX=10116 GN=Samm50 PE=1 SV=1	-0.541618	0.268331
						Neuronal migration protein doublecortin OS=Rattus norvegicus OX=10116 GN=Dcx PE=1 SV=1	-0.556393	0.896196								Ankyrin 2 OS=Rattus norvegicus OX=10116 GN=Ank2 PE=1 SV=3	-0.541618	0.234054
						Disks large homolog 2 OS=Rattus norvegicus OX=10116 GN=Dlg2 PE=1 SV=1	-0.556393	0.954677								F-box only protein 45 OS=Rattus norvegicus OX=10116 GN=Fbxo45 PE=3 SV=1	-0.537424	0.731466
						Dedicator of cytokinesis 7 OS=Rattus norvegicus OX=10116 GN=Dock7 PE=1 SV=1	-0.556393	1.15989								Myosin phosphatase Rho-interacting protein OS=Rattus norvegicus OX=10116 GN=Mprip PE=1 SV=1	-0.537424	0.493264
						Nucleoside-diphosphate kinase OS=Rattus norvegicus OX=10116 GN=Ak5 PE=1 SV=1	-0.556393	1.27737								L-serine-phosphatidylethanolamine phosphatidyltransferase OS=Rattus norvegicus OX=10116 GN=Ptdss1 PE=1 SV=1	-0.537424	0.407393
						40S ribosomal protein S6 OS=Rattus norvegicus OX=10116 GN=Rps6 PE=1 SV=1	-0.556393	1.284								Catenin delta-2 OS=Rattus norvegicus OX=10116 GN=Ctnnd2 PE=1 SV=3	-0.533242	0.463167
						Guanine nucleotide-binding protein subunit beta-5 OS=Rattus norvegicus OX=10116 GN=Gnb5 PE=2 SV=1	-0.535332	0.00656377								Novel acetylcholine receptor chaperone OS=Rattus norvegicus OX=10116 GN=Tmem35a PE=1 SV=1	-0.533242	0.215414
						RNA 3'-terminal phosphate cyclase OS=Rattus norvegicus OX=10116 GN=Rtca PE=1 SV=1	-0.535332	0.0123337								Elongation factor 2 OS=Rattus norvegicus OX=10116 GN=Eef2 PE=1 SV=4	-0.531156	0.6045
						Syntaxin-1B OS=Rattus norvegicus OX=10116 GN=Stx1b PE=1 SV=1	-0.535332	0.488117								Actin-related protein 2/3 complex subunit 5-like protein OS=Rattus norvegicus OX=10116 GN=Arpc5l PE=1 SV=2	-0.529073	0.848706
						Wiskott-Aldrich syndrome protein family member 1 OS=Rattus norvegicus OX=10116 GN=Wasf1 PE=1 SV=1	-0.535332	0.534617								Alpha-L-fucosidase OS=Rattus norvegicus OX=10116 GN=Fuca1 PE=1 SV=1	-0.526992	1.16234
						Sodium/potassium-transporting ATPase subunit alpha-1 OS=Rattus norvegicus OX=10116 GN=Atp1a1 PE=1 SV=1	-0.535332	0.978811								60S ribosomal protein L6 OS=Rattus norvegicus OX=10116 GN=Rpl6 PE=1 SV=5	-0.524915	0.12455
						Rho GTPase-activating protein 32 OS=Rattus norvegicus OX=10116 GN=Arhgap32 PE=1 SV=2	-0.514573	0.0186345								Actin, beta-like 2 OS=Rattus norvegicus OX=10116 GN=Actbl2 PE=1 SV=1	-0.522841	0.943828
						Laminin subunit beta-2 OS=Rattus norvegicus OX=10116 GN=Lamb2 PE=1 SV=1	-0.514573	0.331614								Calmodulin-3 OS=Rattus norvegicus OX=10116 GN=Calm3 PE=1 SV=1	-0.514573	0.613838
						ATP synthase subunit d, mitochondrial OS=Rattus norvegicus OX=10116 GN=Atp5pd PE=1 SV=3	-0.514573	0.363512								T-complex protein 1 subunit beta OS=Rattus norvegicus OX=10116 GN=Cct2 PE=1 SV=3	-0.514573	0.449849
						Ubiquitin-conjugating enzyme E2 N OS=Rattus norvegicus OX=10116 GN=Ube2n PE=1 SV=1	-0.514573	0.38934								RNA helicase OS=Rattus norvegicus OX=10116 GN=Eif4a1 PE=1 SV=1	-0.514573	0.156927
						Receptor of activated protein C kinase 1 OS=Rattus norvegicus OX=10116 GN=Rack1 PE=1 SV=3	-0.514573	0.405607								Endophilin-A1 OS=Rattus norvegicus OX=10116 GN=Sh3gl2 PE=1 SV=2	-0.512514	0.586385
						Cytoskeleton-associated protein 5 OS=Rattus norvegicus OX=10116 GN=Ckap5 PE=1 SV=3	-0.514573	0.442493								Annexin A1 OS=Rattus norvegicus OX=10116 GN=Anxa1 PE=1 SV=2	-0.510457	0.553193
						Peroxiredoxin-5, mitochondrial OS=Rattus norvegicus OX=10116 GN=Prdx5 PE=1 SV=1	-0.514573	0.44855								Profilin-1 OS=Rattus norvegicus OX=10116 GN=Pfn1 PE=1 SV=2	-0.510457	0.505882
						Serine/threonine-protein phosphatase 2A 55 kDa regulatory subunit B alpha isoform OS=Rattus norvegicus OX=10116 GN=Ppp2r2a PE=2 SV=1	-0.514573	0.489455								Histamine H1 receptor OS=Rattus norvegicus OX=10116 GN=Hrh1 PE=1 SV=1	-0.510457	0.368551
						Asparagine--tRNA ligase OS=Rattus norvegicus OX=10116 GN=Nars PE=1 SV=2	-0.514573	0.497573								14-3-3 protein beta/alpha OS=Rattus norvegicus OX=10116 GN=Ywhab PE=1 SV=3	-0.510457	0.112649
						Elongation factor 2 OS=Rattus norvegicus OX=10116 GN=Eef2 PE=1 SV=4	-0.514573	0.730487								Monocarboxylate transporter 1 OS=Rattus norvegicus OX=10116 GN=Slc16a1 PE=1 SV=1	-0.500218	0.368551
						Disks large-associated protein 4 OS=Rattus norvegicus OX=10116 GN=Dlgap4 PE=1 SV=1	-0.514573	0.737549								Aldo-keto reductase family 1 member A1 OS=Rattus norvegicus OX=10116 GN=Akr1a1 PE=1 SV=2	-0.494109	0.760473
						Microtubule-associated scaffold protein 2 OS=Rattus norvegicus OX=10116 GN=Mtus2 PE=1 SV=1	-0.514573	0.818156								Teneurin-2 OS=Rattus norvegicus OX=10116 GN=Tenm2 PE=3 SV=2	-0.494109	0.356691
						Serine/threonine-protein phosphatase 2B catalytic subunit alpha isoform OS=Rattus norvegicus OX=10116 GN=Ppp3ca PE=1 SV=1	-0.514573	0.838632								Protein RER1 OS=Rattus norvegicus OX=10116 GN=Rer1 PE=1 SV=1	-0.492079	0.234054
						60S ribosomal protein L35a OS=Rattus norvegicus OX=10116 GN=Rpl35a PE=3 SV=1	-0.514573	0.838632								T-complex protein 1 subunit gamma OS=Rattus norvegicus OX=10116 GN=Cct3 PE=1 SV=1	-0.490051	0.295952
						Mitogen-activated protein kinase kinase kinase kinase 4 OS=Rattus norvegicus OX=10116 GN=Map4k4 PE=1 SV=1	-0.514573	0.866461								40S ribosomal protein S20 OS=Rattus norvegicus OX=10116 PE=1 SV=1	-0.488026	0.6045
						Alpha-1,4 glucan phosphorylase OS=Rattus norvegicus OX=10116 GN=Pygb PE=1 SV=2	-0.514573	0.89279								Potassium voltage-gated channel subfamily D member 2 OS=Rattus norvegicus OX=10116 GN=Kcnd2 PE=1 SV=1	-0.488026	0.244385
						Eukaryotic translation initiation factor 4 gamma, 1 OS=Rattus norvegicus OX=10116 GN=Eif4g1 PE=1 SV=1	-0.514573	0.906578								Cationic trypsin-3 OS=Rattus norvegicus OX=10116 GN=Try3 PE=2 SV=1	-0.488026	0.215414
						Non-specific serine/threonine protein kinase OS=Rattus norvegicus OX=10116 GN=Stk39 PE=1 SV=1	-0.514573	0.917215								Rho guanine nucleotide exchange factor 2 OS=Rattus norvegicus OX=10116 GN=Arhgef2 PE=1 SV=1	-0.479955	0.348832
						60S ribosomal protein L10a OS=Rattus norvegicus OX=10116 GN=Rpl10a PE=1 SV=2	-0.514573	1.08725								E3 ubiquitin-protein ligase RNF8 OS=Rattus norvegicus OX=10116 GN=Rnf8 PE=2 SV=1	-0.479955	0.0530196
						Epoxide hydrolase 1 OS=Rattus norvegicus OX=10116 GN=Ephx1 PE=1 SV=1	-0.514573	1.21681								Leucine-rich repeat-containing protein 4B OS=Rattus norvegicus OX=10116 GN=Lrrc4b PE=1 SV=1	-0.477944	0.684199
						60S ribosomal protein L26 OS=Rattus norvegicus OX=10116 GN=Rpl26 PE=1 SV=1	-0.514573	1.21968								Dystrophin-related protein 2 OS=Rattus norvegicus OX=10116 GN=Drp2 PE=1 SV=2	-0.473931	0.339194
						60S ribosomal protein L24 OS=Rattus norvegicus OX=10116 GN=Rpl24 PE=1 SV=1	-0.514573	1.30627								Protein lin-7 homolog C OS=Rattus norvegicus OX=10116 GN=Lin7c PE=1 SV=1	-0.471929	0.943828
						Lysozyme C-1 OS=Rattus norvegicus OX=10116 GN=Lyz1 PE=1 SV=2	-0.494109	0.172631								40S ribosomal protein S2 OS=Rattus norvegicus OX=10116 GN=Rps2 PE=1 SV=1	-0.471929	0.0628412
						Profilin OS=Rattus norvegicus OX=10116 GN=Pfn2 PE=3 SV=1	-0.494109	0.260428								60S ribosomal protein L10 OS=Rattus norvegicus OX=10116 GN=Rpl10 PE=1 SV=3	-0.469929	0.117626
						Glia-derived nexin OS=Rattus norvegicus OX=10116 GN=Serpine2 PE=1 SV=1	-0.494109	0.270835								Transmembrane protein 33 OS=Rattus norvegicus OX=10116 GN=Tmem33 PE=2 SV=1	-0.467932	0.246408
						Peroxisomal multifunctional enzyme type 2 OS=Rattus norvegicus OX=10116 GN=Hsd17b4 PE=1 SV=3	-0.494109	0.380907								F-actin-capping protein subunit beta OS=Rattus norvegicus OX=10116 GN=Capzb PE=1 SV=1	-0.463947	1.06418
						ATP-dependent 6-phosphofructokinase, liver type OS=Rattus norvegicus OX=10116 GN=Pfkl PE=1 SV=3	-0.494109	0.444906								Exdl2 protein OS=Rattus norvegicus OX=10116 GN=Exd2 PE=2 SV=1	-0.463947	1.03914
						Non-POU domain-containing octamer-binding protein OS=Rattus norvegicus OX=10116 GN=Nono PE=1 SV=3	-0.494109	0.455932								Nucleolin OS=Rattus norvegicus OX=10116 GN=Ncl PE=1 SV=1	-0.463947	0.220889
						RNA helicase OS=Rattus norvegicus OX=10116 GN=Ddx17 PE=1 SV=1	-0.494109	0.625252								Ras-related protein Rab-3A OS=Rattus norvegicus OX=10116 GN=Rab3a PE=1 SV=1	-0.461959	0.776598
						Glutathione transferase OS=Rattus norvegicus OX=10116 GN=Gstm1 PE=1 SV=2	-0.494109	0.853872								Ras-related protein Rab-7a OS=Rattus norvegicus OX=10116 GN=Rab7a PE=1 SV=2	-0.45799	0.537297
						Proline-rich 36 OS=Rattus norvegicus OX=10116 GN=Prr36 PE=4 SV=2	-0.494109	0.876148								Neural cell adhesion molecule 1 OS=Rattus norvegicus OX=10116 GN=Ncam1 PE=1 SV=2	-0.45799	0.463167
						Neurofilament light polypeptide OS=Rattus norvegicus OX=10116 GN=Nefl PE=1 SV=3	-0.494109	0.882729								Helicase-like transcription factor OS=Rattus norvegicus OX=10116 GN=Hltf PE=1 SV=1	-0.450084	0.279423
						40S ribosomal protein S26 OS=Rattus norvegicus OX=10116 GN=Rps26 PE=3 SV=3	-0.494109	0.91364								Ras-related protein Rab-21 OS=Rattus norvegicus OX=10116 GN=Rab21 PE=2 SV=1	-0.450084	0.192163
						60S ribosomal protein L32 OS=Rattus norvegicus OX=10116 GN=Rpl32 PE=1 SV=2	-0.494109	1.36653								Thy-1 membrane glycoprotein OS=Rattus norvegicus OX=10116 GN=Thy1 PE=1 SV=1	-0.448115	1.27558
						60S ribosomal protein L23 OS=Rattus norvegicus OX=10116 GN=Rpl23 PE=2 SV=1	-0.494109	1.37675								Apical junction component 1 homolog OS=Rattus norvegicus OX=10116 GN=Ajm1 PE=1 SV=3	-0.448115	0.279423
						Unconventional myosin-Vb OS=Rattus norvegicus OX=10116 GN=Myo5b PE=1 SV=3	-0.494109	1.46471								Ral guanine nucleotide dissociation stimulator-like 3 OS=Rattus norvegicus OX=10116 GN=Rgl3 PE=1 SV=1	-0.446148	0.253354
						PDZ domain-containing protein GIPC1 OS=Rattus norvegicus OX=10116 GN=Gipc1 PE=1 SV=2	-0.494109	1.69465								Coronin-1A OS=Rattus norvegicus OX=10116 GN=Coro1a PE=1 SV=3	-0.444184	0.760473
						Mitochondrial import inner membrane translocase subunit Tim13 OS=Rattus norvegicus OX=10116 GN=Timm13 PE=3 SV=1	-0.473931	0.270835								Uncharacterized protein (Fragment) OS=Rattus norvegicus OX=10116 PE=1 SV=3	-0.444184	0.339194
						Double-stranded RNA-binding protein Staufen homolog 2 OS=Rattus norvegicus OX=10116 GN=Stau2 PE=1 SV=1	-0.473931	0.274088								60S ribosomal protein L36 OS=Rattus norvegicus OX=10116 GN=Rpl36 PE=3 SV=1	-0.440263	0.00761881
						Protein LYRIC OS=Rattus norvegicus OX=10116 GN=Mtdh PE=1 SV=2	-0.473931	0.431798								DExH-box helicase 57 OS=Rattus norvegicus OX=10116 GN=Dhx57 PE=4 SV=1	-0.438307	0.114522
						SOGA family member 3 OS=Rattus norvegicus OX=10116 GN=Soga3 PE=1 SV=1	-0.473931	0.447332								Neurabin-1 OS=Rattus norvegicus OX=10116 GN=Ppp1r9a PE=1 SV=1	-0.436354	0.368551
						HECT-type E3 ubiquitin transferase OS=Rattus norvegicus OX=10116 GN=Hecw1 PE=1 SV=2	-0.473931	0.534617								Mitochondrial pyruvate carrier 1 OS=Rattus norvegicus OX=10116 GN=Mpc1 PE=3 SV=1	-0.436354	0.168791
						Aspartate--tRNA ligase, cytoplasmic OS=Rattus norvegicus OX=10116 GN=Dars1 PE=1 SV=1	-0.473931	0.578396								Heat shock protein HSP 90-beta OS=Rattus norvegicus OX=10116 GN=Hsp90ab1 PE=1 SV=4	-0.432455	1.06418
						Tropomyosin alpha-4 chain OS=Rattus norvegicus OX=10116 GN=Tpm4 PE=1 SV=3	-0.473931	0.730487								Tricarboxylate transport protein, mitochondrial OS=Rattus norvegicus OX=10116 GN=Slc25a1 PE=1 SV=1	-0.424688	0.14515
						Interferon-inducible double-stranded RNA-dependent protein kinase activator A OS=Rattus norvegicus OX=10116 GN=Prkra PE=1 SV=1	-0.473931	0.876148								RT1 class I, locus T24, gene 3 OS=Rattus norvegicus OX=10116 GN=RT1-T24-3 PE=4 SV=2	-0.422752	0.234054
						Nuclear GTPase, germinal center-associated OS=Rattus norvegicus OX=10116 GN=Nuggc PE=4 SV=3	-0.473931	0.906578								Protein arginine methyltransferase 8 OS=Rattus norvegicus OX=10116 GN=Prmt8 PE=4 SV=2	-0.42082	0.537297
						Ubiquitin-40S ribosomal protein S27a OS=Rattus norvegicus OX=10116 GN=Rps27a PE=1 SV=2	-0.473931	0.966576								Rho GTPase-activating protein 32 OS=Rattus norvegicus OX=10116 GN=Arhgap32 PE=1 SV=2	-0.41889	0.126264
						60S ribosomal protein L10 OS=Rattus norvegicus OX=10116 GN=Rpl10 PE=1 SV=3	-0.473931	1.00393								Tubulin beta-5 chain OS=Rattus norvegicus OX=10116 GN=Tubb5 PE=1 SV=1	-0.416962	0.272644
						Serine/threonine-protein kinase DCLK1 OS=Rattus norvegicus OX=10116 GN=Dclk1 PE=1 SV=1	-0.473931	1.15989								Heterogeneous nuclear ribonucleoprotein M OS=Rattus norvegicus OX=10116 GN=Hnrnpm PE=1 SV=1	-0.415037	0.475752
						RCG29268 OS=Rattus norvegicus OX=10116 GN=Tpgs1 PE=1 SV=1	-0.454032	0.02365								40S ribosomal protein SA OS=Rattus norvegicus OX=10116 GN=Rpsa PE=1 SV=3	-0.411195	0.279423
						Ubiquitin thioesterase OTUB1 OS=Rattus norvegicus OX=10116 GN=Otub1 PE=1 SV=1	-0.454032	0.317855								60 kDa poly(U)-binding-splicing factor OS=Rattus norvegicus OX=10116 GN=Puf60 PE=1 SV=1	-0.407364	0.551912
						Nucleophosmin/nucleoplasmin, 3 OS=Rattus norvegicus OX=10116 GN=Npm3 PE=1 SV=1	-0.454032	0.366532								Myosin regulatory light chain 12B OS=Rattus norvegicus OX=10116 GN=Myl12b PE=1 SV=3	-0.405451	0.69948
						Nucleoside diphosphate kinase B OS=Rattus norvegicus OX=10116 GN=Nme2 PE=1 SV=1	-0.454032	0.437707								Microtubule-associated protein OS=Rattus norvegicus OX=10116 GN=Mapt PE=1 SV=1	-0.401635	0.568968
						cAMP-dependent protein kinase catalytic subunit beta OS=Rattus norvegicus OX=10116 GN=Prkacb PE=1 SV=2	-0.454032	0.600326								Aspartate--tRNA ligase, cytoplasmic OS=Rattus norvegicus OX=10116 GN=Dars1 PE=1 SV=1	-0.401635	0.347733
						Probable G-protein-coupled receptor 158 OS=Rattus norvegicus OX=10116 GN=Gpr158 PE=1 SV=1	-0.454032	0.625252								ERC protein 2 OS=Rattus norvegicus OX=10116 GN=Erc2 PE=1 SV=1	-0.401635	0.124649
						2,4-dienoyl-CoA reductase [(3E)-enoyl-CoA-producing], mitochondrial OS=Rattus norvegicus OX=10116 GN=Decr1 PE=1 SV=2	-0.454032	0.847712								Arp2/3 complex 34 kDa subunit OS=Rattus norvegicus OX=10116 GN=Arpc2 PE=1 SV=1	-0.397828	0.38108
						40S ribosomal protein S4 OS=Rattus norvegicus OX=10116 GN=Rps4x PE=1 SV=1	-0.454032	0.920819								Heat shock cognate 71 kDa protein OS=Rattus norvegicus OX=10116 GN=Hspa8 PE=1 SV=1	-0.395929	0.848706
						Clathrin light chain OS=Rattus norvegicus OX=10116 GN=Clta PE=1 SV=1	-0.454032	0.920819								Asparagine--tRNA ligase OS=Rattus norvegicus OX=10116 GN=Nars PE=1 SV=1	-0.392137	0.385377
						E3 ubiquitin-protein ligase OS=Rattus norvegicus OX=10116 GN=Nedd4 PE=1 SV=1	-0.454032	0.939302								Kinectin 1 OS=Rattus norvegicus OX=10116 GN=Ktn1 PE=1 SV=2	-0.388355	0.200545
						40S ribosomal protein S11 OS=Rattus norvegicus OX=10116 GN=Rps11 PE=1 SV=3	-0.454032	1.03621								Pericentriolar material 1 OS=Rattus norvegicus OX=10116 GN=Pcm1 PE=1 SV=1	-0.384584	0.292235
						Unconventional myosin-6 OS=Rattus norvegicus OX=10116 GN=Myo6 PE=1 SV=3	-0.454032	1.98716								Serine/threonine-protein phosphatase 2A catalytic subunit beta isoform OS=Rattus norvegicus OX=10116 GN=Ppp2cb PE=2 SV=1	-0.382702	0.746818
						Ras-related protein Rab-2A OS=Rattus norvegicus OX=10116 GN=Rab2a PE=2 SV=1	-0.434403	0.195179								cAMP-dependent protein kinase catalytic subunit beta OS=Rattus norvegicus OX=10116 GN=Prkacb PE=1 SV=2	-0.382702	0.571387
						ADP-ribosylation factor 4 OS=Rattus norvegicus OX=10116 GN=Arf4 PE=2 SV=2	-0.434403	0.269218								Carboxypeptidase E OS=Rattus norvegicus OX=10116 GN=Cpe PE=1 SV=3	-0.382702	0.0221421
						TRK-fused gene protein OS=Rattus norvegicus OX=10116 GN=Tfg PE=1 SV=1	-0.434403	0.310691								Phenylalanyl-tRNA synthetase beta subunit OS=Rattus norvegicus OX=10116 GN=Farsb PE=1 SV=1	-0.37707	0.306236
						5'-3' exonuclease PLD3 OS=Rattus norvegicus OX=10116 GN=Pld3 PE=1 SV=1	-0.434403	0.388277								Plasma membrane calcium-transporting ATPase 1 OS=Rattus norvegicus OX=10116 GN=Atp2b1 PE=1 SV=3	-0.375197	0.207543
						EF-hand domain-containing protein D2 OS=Rattus norvegicus OX=10116 GN=Efhd2 PE=1 SV=1	-0.434403	0.425969								Ubiquitin-conjugating enzyme E2 N OS=Rattus norvegicus OX=10116 GN=Ube2n PE=1 SV=1	-0.375197	0.0715768
						ELAV-like protein OS=Rattus norvegicus OX=10116 GN=Elavl2 PE=1 SV=4	-0.434403	0.435334								Phosphoglycerate mutase 1 OS=Rattus norvegicus OX=10116 GN=Pgam1 PE=1 SV=4	-0.367732	0.630675
						Calponin-3 OS=Rattus norvegicus OX=10116 GN=Cnn3 PE=1 SV=1	-0.434403	0.500313								Mitochondrial carnitine/acylcarnitine carrier protein OS=Rattus norvegicus OX=10116 GN=Slc25a20 PE=1 SV=1	-0.367732	0.463167
						D-3-phosphoglycerate dehydrogenase OS=Rattus norvegicus OX=10116 GN=Phgdh PE=1 SV=3	-0.434403	0.645892								Glycogen synthase kinase-3 alpha OS=Rattus norvegicus OX=10116 GN=Gsk3a PE=1 SV=1	-0.367732	0.25138
						Large neutral amino acids transporter small subunit 1 OS=Rattus norvegicus OX=10116 GN=Slc7a5 PE=1 SV=2	-0.434403	0.681937								Gamma-aminobutyric acid receptor subunit beta-1 OS=Rattus norvegicus OX=10116 GN=Gabrb1 PE=1 SV=1	-0.364013	0.701095
						Phosphatidylethanolamine-binding protein 1 OS=Rattus norvegicus OX=10116 GN=Pebp1 PE=1 SV=3	-0.434403	0.732828								Receptor of activated protein C kinase 1 OS=Rattus norvegicus OX=10116 GN=Rack1 PE=1 SV=3	-0.364013	0.695678
						Plasma membrane calcium-transporting ATPase 1 OS=Rattus norvegicus OX=10116 GN=Atp2b1 PE=1 SV=3	-0.434403	0.74958								Transitional endoplasmic reticulum ATPase OS=Rattus norvegicus OX=10116 GN=Vcp PE=1 SV=3	-0.364013	0.229893
						ATP-dependent RNA helicase DDX1 OS=Rattus norvegicus OX=10116 GN=Ddx1 PE=1 SV=1	-0.434403	0.943095								Septin-9 OS=Rattus norvegicus OX=10116 GN=Septin9 PE=1 SV=3	-0.356606	0.0828925
						Very-long-chain enoyl-CoA reductase OS=Rattus norvegicus OX=10116 GN=Tecr PE=1 SV=1	-0.434403	0.966576								Gamma-aminobutyric acid receptor subunit alpha-5 OS=Rattus norvegicus OX=10116 GN=Gabra5 PE=2 SV=1	-0.354759	0.0515207
						CAP-Gly domain-containing linker protein 2 OS=Rattus norvegicus OX=10116 GN=Clip2 PE=1 SV=1	-0.434403	1.13727								Oligodendrocyte transcription factor 3 OS=Rattus norvegicus OX=10116 GN=Olig3 PE=4 SV=1	-0.351074	0.575666
						Reticulon OS=Rattus norvegicus OX=10116 GN=Rtn1 PE=1 SV=2	-0.434403	1.49757								Importin subunit beta-1 OS=Rattus norvegicus OX=10116 GN=Kpnb1 PE=1 SV=1	-0.351074	0.112234
						RCG48334, isoform CRA_e OS=Rattus norvegicus OX=10116 GN=Rbm14 PE=1 SV=1	-0.415037	0.229148								Ras-related protein Rab-18 OS=Rattus norvegicus OX=10116 GN=Rab18 PE=2 SV=1	-0.351074	0.107665
						Ubiquitin-conjugating enzyme E2 variant 2 OS=Rattus norvegicus OX=10116 GN=Ube2v2 PE=1 SV=1	-0.415037	0.272459								Ubiquitin thioesterase OTUB1 OS=Rattus norvegicus OX=10116 GN=Otub1 PE=1 SV=1	-0.347399	0.848706
						Profilin-1 OS=Rattus norvegicus OX=10116 GN=Pfn1 PE=1 SV=2	-0.415037	0.367543								Plakophilin 4 OS=Rattus norvegicus OX=10116 GN=Pkp4 PE=1 SV=2	-0.347399	0.679697
						Rab GDP dissociation inhibitor alpha OS=Rattus norvegicus OX=10116 GN=Gdi1 PE=1 SV=1	-0.415037	0.436519								Nck-associated protein 1 OS=Rattus norvegicus OX=10116 GN=Nckap1 PE=1 SV=3	-0.341903	0.317346
						Activator of Hsp90 ATPase activity 1 OS=Rattus norvegicus OX=10116 GN=Ahsa1 PE=1 SV=1	-0.415037	0.455932								Ankyrin 2 OS=Rattus norvegicus OX=10116 GN=Ank2 PE=1 SV=1	-0.341903	0.164867
						Fatty acid-binding protein 5 OS=Rattus norvegicus OX=10116 GN=Fabp5 PE=1 SV=3	-0.415037	0.549751								60S ribosomal protein L5 OS=Rattus norvegicus OX=10116 GN=Rpl5 PE=1 SV=3	-0.340075	0.107704
						Serine/threonine-protein phosphatase 6 catalytic subunit OS=Rattus norvegicus OX=10116 GN=Ppp6c PE=2 SV=2	-0.415037	0.555955								Poly(rC)-binding protein 2 OS=Rattus norvegicus OX=10116 GN=Pcbp2 PE=1 SV=1	-0.33825	0.00222514
						ArfGAP with GTPase domain, ankyrin repeat and PH domain 3 OS=Rattus norvegicus OX=10116 GN=Agap3 PE=3 SV=1	-0.415037	0.570248								60S ribosomal protein L38 OS=Rattus norvegicus OX=10116 PE=3 SV=1	-0.336428	0.192844
						Heat shock protein 105 kDa OS=Rattus norvegicus OX=10116 GN=Hsph1 PE=1 SV=1	-0.415037	0.657577								Neurocalcin-delta OS=Rattus norvegicus OX=10116 GN=Ncald PE=1 SV=3	-0.336428	0.160627
						RNA transcription, translation and transport factor protein OS=Rattus norvegicus OX=10116 GN=Rtraf PE=1 SV=1	-0.415037	1.09854								Ubiquitin carboxyl-terminal hydrolase OS=Rattus norvegicus OX=10116 GN=Usp5 PE=1 SV=1	-0.334607	0.446783
						60S ribosomal protein L18a OS=Rattus norvegicus OX=10116 GN=Rpl18a PE=2 SV=1	-0.415037	1.19382								Glioblastoma amplified sequence OS=Rattus norvegicus OX=10116 GN=Nipsnap2 PE=1 SV=1	-0.334607	0.171207
						Neurofilament medium polypeptide OS=Rattus norvegicus OX=10116 GN=Nefm PE=1 SV=4	-0.415037	1.75203								Potassium voltage-gated channel subfamily A member 2 OS=Rattus norvegicus OX=10116 GN=Kcna2 PE=1 SV=1	-0.334607	0.00242999
						Nebulette OS=Rattus norvegicus OX=10116 GN=Nebl PE=1 SV=1	-0.395929	0.0809219								Prothrombin OS=Rattus norvegicus OX=10116 GN=F2 PE=1 SV=1	-0.332789	0.518789
						Valine--tRNA ligase OS=Rattus norvegicus OX=10116 GN=Vars1 PE=2 SV=2	-0.395929	0.0979971								Cytoskeleton-associated protein 4 OS=Rattus norvegicus OX=10116 GN=Ckap4 PE=1 SV=2	-0.332789	0.460661
						RCG38820 OS=Rattus norvegicus OX=10116 GN=Upf1 PE=1 SV=3	-0.395929	0.106793								Actin-related protein 2/3 complex subunit 4 OS=Rattus norvegicus OX=10116 GN=Arpc4 PE=1 SV=1	-0.332789	0.0810831
						IQ motif and Sec7 domain ArfGEF 2 OS=Rattus norvegicus OX=10116 GN=Iqsec2 PE=1 SV=1	-0.395929	0.170696								Reticulon OS=Rattus norvegicus OX=10116 GN=Rtn1 PE=1 SV=2	-0.330973	0.317346
						Cyth1 protein OS=Rattus norvegicus OX=10116 GN=Cyth1 PE=2 SV=1	-0.395929	0.268411								Thioredoxin domain containing 1 OS=Rattus norvegicus OX=10116 GN=Tmx1 PE=1 SV=1	-0.32916	0.263529
						1-acyl-sn-glycerol-3-phosphate acyltransferase OS=Rattus norvegicus OX=10116 GN=Agpat1 PE=1 SV=1	-0.395929	0.296709								MICOS complex subunit Mic60 (Fragment) OS=Rattus norvegicus OX=10116 GN=Immt PE=1 SV=1	-0.325539	0.760473
						Neuroplastin OS=Rattus norvegicus OX=10116 GN=Nptn PE=1 SV=2	-0.395929	0.313364								Splicing factor 3b, subunit 1 OS=Rattus norvegicus OX=10116 GN=Sf3b1 PE=1 SV=1	-0.325539	0.537297
						Catenin delta-2 OS=Rattus norvegicus OX=10116 GN=Ctnnd2 PE=1 SV=3	-0.395929	0.359519								Uncharacterized protein OS=Rattus norvegicus OX=10116 PE=4 SV=1	-0.323733	0.776598
						Platelet-activating factor acetylhydrolase IB subunit alpha OS=Rattus norvegicus OX=10116 GN=Pafah1b1 PE=1 SV=2	-0.395929	0.387216								Microtubule-associated protein OS=Rattus norvegicus OX=10116 GN=Map2 PE=1 SV=1	-0.323733	0.234054
						MAP/microtubule affinity-regulating kinase 3 OS=Rattus norvegicus OX=10116 GN=Mark3 PE=1 SV=1	-0.395929	0.443697								Elongin-B OS=Rattus norvegicus OX=10116 GN=Elob PE=1 SV=1	-0.318326	0.6288
						RAB39, member RAS oncogene family (Predicted) OS=Rattus norvegicus OX=10116 GN=Rab39a PE=3 SV=1	-0.395929	0.623423								Phosphatidylinositol-3,4-bisphosphate 4-phosphatase OS=Rattus norvegicus OX=10116 GN=Inpp4a PE=1 SV=3	-0.316528	0.0868325
						60S ribosomal protein L13a OS=Rattus norvegicus OX=10116 GN=Rpl13a PE=1 SV=1	-0.395929	0.709965								T-complex protein 1 subunit delta OS=Rattus norvegicus OX=10116 GN=Cct4 PE=1 SV=3	-0.314733	0.298528
						Midkine OS=Rattus norvegicus OX=10116 GN=Mdk PE=2 SV=1	-0.395929	0.767004								H2-K region expressed gene 4, rat orthologue OS=Rattus norvegicus OX=10116 GN=Slc39a7 PE=1 SV=1	-0.312939	0.171789
						Family with sequence similarity 49, member A OS=Rattus norvegicus OX=10116 GN=Fam49a PE=1 SV=1	-0.395929	0.89279								Actin-related protein 2/3 complex subunit 1A OS=Rattus norvegicus OX=10116 GN=Arpc1a PE=2 SV=1	-0.311148	0.553193
						60S ribosomal protein L17 OS=Rattus norvegicus OX=10116 GN=Rpl17 PE=2 SV=3	-0.395929	1.09854								Ras-related protein Rab-2A OS=Rattus norvegicus OX=10116 GN=Rab2a PE=2 SV=1	-0.309359	0.316285
						60S ribosomal protein L15 OS=Rattus norvegicus OX=10116 GN=Rpl15 PE=1 SV=2	-0.395929	1.09854								WD repeat-containing protein 91 OS=Rattus norvegicus OX=10116 GN=Wdr91 PE=2 SV=1	-0.305788	0.498058
						Matrin-3 OS=Rattus norvegicus OX=10116 GN=Matr3 PE=1 SV=1	-0.395929	1.17393								Leucine-rich repeat-containing protein 59 OS=Rattus norvegicus OX=10116 GN=Lrrc59 PE=1 SV=1	-0.300448	0.43358
						Nck-associated protein 1 OS=Rattus norvegicus OX=10116 GN=Nckap1 PE=1 SV=3	-0.395929	1.21968								Protein phosphatase 2 (Formerly 2A), regulatory subunit A (PR 65), alpha isoform, isoform CRA_a OS=Rattus norvegicus OX=10116 GN=Ppp2r1a PE=1 SV=1	-0.298673	0.884447
						Cytoplasmic FMR1-interacting protein 2 OS=Rattus norvegicus OX=10116 GN=Cyfip2 PE=4 SV=1	-0.395929	1.2815								Unconventional myosin-Ic OS=Rattus norvegicus OX=10116 GN=Myo1c PE=1 SV=2	-0.298673	0.318569
						RNA-splicing ligase RtcB homolog OS=Rattus norvegicus OX=10116 GN=Rtcb PE=2 SV=1	-0.395929	1.74958								40S ribosomal protein S18 OS=Rattus norvegicus OX=10116 PE=3 SV=3	-0.298673	0.213572
						Histone H1.5 OS=Rattus norvegicus OX=10116 GN=H1-5 PE=1 SV=1	-0.37707	0.0101054								40S ribosomal protein S3a OS=Rattus norvegicus OX=10116 GN=Rps3a PE=1 SV=2	-0.298673	0.0618528
						Casein kinase 1 epsilon OS=Rattus norvegicus OX=10116 GN=Csnk1e PE=1 SV=1	-0.37707	0.0872467								Serine (Or cysteine) peptidase inhibitor, clade A (Alpha-1 antiproteinase, antitrypsin), member 9 (Predicted) OS=Rattus norvegicus OX=10116 GN=Serpina9 PE=3 SV=1	-0.296899	0.537297
						Phosphatidylinositol-3,5-bisphosphate 3-phosphatase OS=Rattus norvegicus OX=10116 GN=Mtmr1 PE=1 SV=1	-0.37707	0.128427								40S ribosomal protein S10 OS=Rattus norvegicus OX=10116 GN=Rps10 PE=2 SV=1	-0.296899	0.237323
						Septin OS=Rattus norvegicus OX=10116 GN=Sept7 PE=1 SV=3	-0.37707	0.206908								Vacuolar protein-sorting-associated protein 25 OS=Rattus norvegicus OX=10116 GN=Vps25 PE=1 SV=1	-0.295128	0.173599
						tRNA methyltransferase 10 homolog C OS=Rattus norvegicus OX=10116 GN=Trmt10c PE=2 SV=1	-0.37707	0.274905								Alpha-tubulin N-acetyltransferase 1 OS=Rattus norvegicus OX=10116 GN=Atat1 PE=1 SV=1	-0.293359	0.0659438
						Aminoacyl tRNA synthase complex-interacting multifunctional protein 2 OS=Rattus norvegicus OX=10116 GN=Aimp2 PE=2 SV=1	-0.37707	0.310691								YTH N(6)-methyladenosine RNA-binding protein 2 OS=Rattus norvegicus OX=10116 GN=Ythdf2 PE=1 SV=3	-0.291592	0.385816
						Endophilin-A1 OS=Rattus norvegicus OX=10116 GN=Sh3gl2 PE=1 SV=2	-0.37707	0.341989								Keratin, type II cytoskeletal 8 OS=Rattus norvegicus OX=10116 GN=Krt8 PE=1 SV=3	-0.289827	0.029397
						Flotillin-1 OS=Rattus norvegicus OX=10116 GN=Flot1 PE=2 SV=2	-0.37707	0.454693								Spectrin beta chain OS=Rattus norvegicus OX=10116 GN=Sptbn1 PE=1 SV=3	-0.288065	0.368551
						60S ribosomal protein L12 OS=Rattus norvegicus OX=10116 GN=Rpl12 PE=2 SV=1	-0.37707	0.455932								Glutathione S-transferase kappa 1 OS=Rattus norvegicus OX=10116 GN=Gstk1 PE=1 SV=3	-0.284546	0.0446176
						Glutathione S-transferase Mu 5 OS=Rattus norvegicus OX=10116 GN=Gstm5 PE=1 SV=3	-0.37707	0.642065								Vesicle-trafficking protein SEC22b OS=Rattus norvegicus OX=10116 GN=Sec22b PE=1 SV=3	-0.28279	0.314096
						CUE domain-containing 1 OS=Rattus norvegicus OX=10116 GN=Cuedc1 PE=2 SV=1	-0.37707	0.669586								Excitatory amino acid transporter 2 OS=Rattus norvegicus OX=10116 GN=Slc1a2 PE=1 SV=2	-0.28279	0.000742949
						Unconventional myosin-Ie OS=Rattus norvegicus OX=10116 GN=Myo1e PE=1 SV=1	-0.37707	0.920819								Protein FAM98A OS=Rattus norvegicus OX=10116 GN=Fam98a PE=2 SV=1	-0.281036	0.00630344
						Tight junction protein ZO-1 OS=Rattus norvegicus OX=10116 GN=Tjp1 PE=1 SV=1	-0.37707	0.946922								Uncharacterized protein OS=Rattus norvegicus OX=10116 PE=3 SV=1	-0.275786	0.292235
						60S ribosomal protein L28 OS=Rattus norvegicus OX=10116 PE=3 SV=1	-0.37707	0.946922								Adhesion G protein-coupled receptor L2 OS=Rattus norvegicus OX=10116 GN=Adgrl2 PE=1 SV=4	-0.274041	0.0689176
						Neurabin-2 OS=Rattus norvegicus OX=10116 GN=Ppp1r9b PE=1 SV=1	-0.37707	1.14997								Neuropilin-2 OS=Rattus norvegicus OX=10116 GN=Nrp2 PE=2 SV=1	-0.272297	0.348832
						Desmocollin 1 OS=Rattus norvegicus OX=10116 GN=Dsc1 PE=4 SV=1	-0.358454	0.0700704								Serine/threonine-protein phosphatase PP1-beta catalytic subunit OS=Rattus norvegicus OX=10116 GN=Ppp1cb PE=1 SV=3	-0.272297	0.247107
						Dihydrolipoamide acetyltransferase component of pyruvate dehydrogenase complex OS=Rattus norvegicus OX=10116 GN=Pdhx PE=1 SV=1	-0.358454	0.17134								Dolichyl-diphosphooligosaccharide--protein glycosyltransferase subunit 1 OS=Rattus norvegicus OX=10116 GN=Rpn1 PE=1 SV=1	-0.268817	0.317346
						Reticulon OS=Rattus norvegicus OX=10116 GN=Rtn3 PE=1 SV=1	-0.358454	0.270835								Receptor protein-tyrosine kinase OS=Rattus norvegicus OX=10116 GN=Epha4 PE=4 SV=1	-0.268817	0.133597
						Apolipoprotein E OS=Rattus norvegicus OX=10116 GN=Apoe PE=1 SV=2	-0.358454	0.41005								Lysyl oxidase homolog OS=Rattus norvegicus OX=10116 GN=Loxl1 PE=2 SV=1	-0.268817	0.0265704
						Elongation factor 1-gamma OS=Rattus norvegicus OX=10116 GN=Eef1g PE=2 SV=3	-0.358454	0.576754								Protein phosphatase 1 regulatory subunit OS=Rattus norvegicus OX=10116 GN=Ppp1r12a PE=1 SV=1	-0.261881	0.298528
						Dynein light chain 1, cytoplasmic OS=Rattus norvegicus OX=10116 GN=Dynll1 PE=1 SV=1	-0.358454	0.60206								Poly [ADP-ribose] polymerase 1 OS=Rattus norvegicus OX=10116 GN=Parp1 PE=1 SV=4	-0.258425	0.144723
						60S ribosomal protein L8 OS=Rattus norvegicus OX=10116 GN=Rpl8 PE=2 SV=2	-0.358454	0.627088								Ankyrin repeat and death domain-containing 1B OS=Rattus norvegicus OX=10116 GN=Ankdd1b PE=4 SV=1	-0.258425	0.00645115
						Poly [ADP-ribose] polymerase 1 OS=Rattus norvegicus OX=10116 GN=Parp1 PE=1 SV=4	-0.358454	0.790485								ArfGAP with GTPase domain, ankyrin repeat and PH domain 1 OS=Rattus norvegicus OX=10116 GN=Agap1 PE=3 SV=1	-0.253257	0.495895
						60S ribosomal protein L19 OS=Rattus norvegicus OX=10116 GN=Rpl19 PE=1 SV=1	-0.358454	0.793174								Coiled-coil domain-containing 191 OS=Rattus norvegicus OX=10116 GN=Ccdc191 PE=4 SV=1	-0.253257	0.422012
						Very-long-chain (3R)-3-hydroxyacyl-CoA dehydratase OS=Rattus norvegicus OX=10116 GN=Hacd3 PE=1 SV=2	-0.358454	0.917215								Trypsin 5 OS=Rattus norvegicus OX=10116 GN=Try5 PE=4 SV=2	-0.253257	0.422012
						Beta-adducin OS=Rattus norvegicus OX=10116 GN=Add2 PE=1 SV=4	-0.358454	0.966576								ADP/ATP translocase OS=Rattus norvegicus OX=10116 GN=Slc25a4 PE=1 SV=1	-0.249822	0.0593192
						Gap junction alpha-1 protein OS=Rattus norvegicus OX=10116 GN=Gja1 PE=1 SV=2	-0.358454	0.995679								T-complex protein 1 subunit eta OS=Rattus norvegicus OX=10116 GN=Cct7 PE=1 SV=1	-0.246395	0.505882
						Serine/threonine-protein phosphatase PP1-alpha catalytic subunit OS=Rattus norvegicus OX=10116 GN=Ppp1ca PE=1 SV=1	-0.340075	0.158641								Complement C1q subcomponent subunit C OS=Rattus norvegicus OX=10116 GN=C1qc PE=1 SV=2	-0.246395	0.234054
						Ornithine aminotransferase, mitochondrial OS=Rattus norvegicus OX=10116 GN=Oat PE=1 SV=1	-0.340075	0.29243								60S ribosomal protein L21 OS=Rattus norvegicus OX=10116 PE=3 SV=1	-0.246395	0.0609795
						28S ribosomal protein S7, mitochondrial OS=Rattus norvegicus OX=10116 GN=Mrps7 PE=2 SV=2	-0.340075	0.295849								Stress-70 protein, mitochondrial OS=Rattus norvegicus OX=10116 GN=Hspa9 PE=1 SV=3	-0.24127	0.418619
						RAS-related 2 OS=Rattus norvegicus OX=10116 GN=Rras2 PE=1 SV=1	-0.340075	0.41005								Actin-related protein 2/3 complex subunit 3 OS=Rattus norvegicus OX=10116 GN=Arpc3 PE=1 SV=1	-0.239566	0.807488
						ATP-citrate synthase OS=Rattus norvegicus OX=10116 GN=Acly PE=1 SV=1	-0.340075	0.428291								Desmoglein 1 OS=Rattus norvegicus OX=10116 GN=Dsg1 PE=4 SV=3	-0.239566	0.0729114
						SRSF protein kinase 2 OS=Rattus norvegicus OX=10116 GN=Srpk2 PE=1 SV=1	-0.340075	0.438899								PR/SET domain 16 OS=Rattus norvegicus OX=10116 GN=Prdm16 PE=4 SV=1	-0.237864	0.254256
						MICOS complex subunit Mic60 (Fragment) OS=Rattus norvegicus OX=10116 GN=Immt PE=1 SV=1	-0.340075	0.49485								Supervillin OS=Rattus norvegicus OX=10116 GN=Svil PE=1 SV=3	-0.237864	0.0689176
						CMP-N-acetylneuraminic acid synthase OS=Rattus norvegicus OX=10116 GN=Cmas PE=1 SV=1	-0.340075	0.614394								Cytoplasmic dynein 1 intermediate chain 2 OS=Rattus norvegicus OX=10116 GN=Dync1i2 PE=1 SV=1	-0.236164	0.213572
						Transmembrane glycoprotein NMB OS=Rattus norvegicus OX=10116 GN=Gpnmb PE=2 SV=1	-0.340075	1.14267								RAF proto-oncogene serine/threonine-protein kinase OS=Rattus norvegicus OX=10116 GN=Raf1 PE=1 SV=1	-0.234465	0.0689176
						1-acylglycerol-3-phosphate O-acyltransferase 3 OS=Rattus norvegicus OX=10116 GN=Agpat3 PE=1 SV=1	-0.321928	0.0277972								Myosin phosphatase Rho-interacting protein OS=Rattus norvegicus OX=10116 GN=Mprip PE=1 SV=1	-0.231075	0.290911
						Histone H4 OS=Rattus norvegicus OX=10116 GN=H4c2 PE=1 SV=2	-0.321928	0.0757207								S-adenosylhomocysteine hydrolase-like protein 1 OS=Rattus norvegicus OX=10116 GN=Ahcyl1 PE=1 SV=2	-0.231075	0.0458476
						Potassium channel tetramerisation domain containing 3 OS=Rattus norvegicus OX=10116 GN=Kctd3 PE=1 SV=2	-0.321928	0.0814455								CDK5 regulatory subunit-associated protein 2 OS=Rattus norvegicus OX=10116 GN=Cdk5rap2 PE=1 SV=1	-0.229382	0.281678
						Alpha-fetoprotein OS=Rattus norvegicus OX=10116 GN=Afp PE=4 SV=1	-0.321928	0.172631								40S ribosomal protein S19 OS=Rattus norvegicus OX=10116 GN=Rps19l2 PE=3 SV=1	-0.226004	0.463167
						Ethylmalonyl-CoA decarboxylase OS=Rattus norvegicus OX=10116 GN=Echdc1 PE=1 SV=1	-0.321928	0.203426								Arf-GAP with GTPase, ANK repeat and PH domain-containing protein 2 OS=Rattus norvegicus OX=10116 GN=Agap2 PE=1 SV=1	-0.224317	0.137687
						Glycerol-3-phosphate dehydrogenase, mitochondrial OS=Rattus norvegicus OX=10116 GN=Gpd2 PE=1 SV=1	-0.321928	0.272459								Cytoplasmic dynein 1 heavy chain 1 OS=Rattus norvegicus OX=10116 GN=Dync1h1 PE=1 SV=2	-0.224317	0.0720324
						Clathrin coat assembly protein AP180 OS=Rattus norvegicus OX=10116 GN=Snap91 PE=1 SV=1	-0.321928	0.394695								40S ribosomal protein S5 OS=Rattus norvegicus OX=10116 GN=Rps5 PE=1 SV=1	-0.222633	0.470032
						H2-K region expressed gene 4, rat orthologue OS=Rattus norvegicus OX=10116 GN=Slc39a7 PE=1 SV=1	-0.321928	0.489455								Inter alpha-trypsin inhibitor, heavy chain 4 OS=Rattus norvegicus OX=10116 GN=Itih4 PE=1 SV=1	-0.222633	0.306236
						L-lactate dehydrogenase A chain OS=Rattus norvegicus OX=10116 GN=Ldha PE=1 SV=1	-0.321928	0.621602								Kremen protein OS=Rattus norvegicus OX=10116 GN=Kremen1 PE=4 SV=1	-0.21927	0.363138
						Tricarboxylate transport protein, mitochondrial OS=Rattus norvegicus OX=10116 GN=Slc25a1 PE=1 SV=1	-0.321928	0.636388								Caskin-1 OS=Rattus norvegicus OX=10116 GN=Caskin1 PE=1 SV=2	-0.215915	0.179386
						Gamma-adducin OS=Rattus norvegicus OX=10116 GN=Add3 PE=1 SV=1	-0.321928	0.679854								Heat shock protein 105 kDa OS=Rattus norvegicus OX=10116 GN=Hsph1 PE=1 SV=1	-0.215915	0.123253
						Glioblastoma amplified sequence OS=Rattus norvegicus OX=10116 GN=Nipsnap2 PE=1 SV=1	-0.321928	0.821023								Ubiquitin carboxyl-terminal hydrolase isozyme L1 OS=Rattus norvegicus OX=10116 GN=Uchl1 PE=1 SV=2	-0.21424	0.317346
						60S ribosomal protein L13 OS=Rattus norvegicus OX=10116 GN=Rpl13 PE=1 SV=2	-0.321928	0.869666								Sodium/potassium-transporting ATPase subunit alpha-1 OS=Rattus norvegicus OX=10116 GN=Atp1a1 PE=1 SV=1	-0.21424	0.237323
						Adducin 1 (Alpha), isoform CRA_b OS=Rattus norvegicus OX=10116 GN=Add1 PE=1 SV=1	-0.321928	0.896196								F-box protein 41 OS=Rattus norvegicus OX=10116 GN=Fbxo41 PE=1 SV=3	-0.21424	0.112649
						Glutathione S-transferase alpha-3 OS=Rattus norvegicus OX=10116 GN=Gsta3 PE=1 SV=3	-0.321928	0.962574								Ig-like domain-containing protein OS=Rattus norvegicus OX=10116 PE=1 SV=2	-0.210897	0.306236
						Glycerol-3-phosphate dehydrogenase [NAD(+)] OS=Rattus norvegicus OX=10116 GN=Gpd1l PE=1 SV=1	-0.321928	0.962574								CLIP-associating protein 2 OS=Rattus norvegicus OX=10116 GN=Clasp2 PE=1 SV=1	-0.210897	0.148125
						Kinesin-like protein KIF21B OS=Rattus norvegicus OX=10116 GN=Kif21b PE=1 SV=1	-0.321928	0.966576								Keratin, type I cytoskeletal 42 OS=Rattus norvegicus OX=10116 GN=Krt42 PE=3 SV=1	-0.210897	0.00623397
						60S ribosomal protein L3 OS=Rattus norvegicus OX=10116 GN=Rpl3 PE=1 SV=3	-0.321928	0.995679								Ig-like domain-containing protein OS=Rattus norvegicus OX=10116 PE=4 SV=2	-0.207561	0.363379
						Unconventional myosin-Ib OS=Rattus norvegicus OX=10116 GN=Myo1b PE=1 SV=1	-0.321928	1.32975								Tubulin beta chain OS=Rattus norvegicus OX=10116 GN=Tubb4a PE=1 SV=1	-0.207561	0.160627
						Histone H2B type 1 OS=Rattus norvegicus OX=10116 PE=1 SV=2	-0.304006	0.0788339								GPI transamidase component PIG-S OS=Rattus norvegicus OX=10116 GN=Pigs PE=2 SV=3	-0.207561	0.116651
						Glutathione peroxidase OS=Rattus norvegicus OX=10116 GN=Gpx4 PE=1 SV=2	-0.304006	0.110138								Guanine nucleotide-binding protein G(o) subunit alpha OS=Rattus norvegicus OX=10116 GN=Gnao1 PE=1 SV=2	-0.205896	0.55478
						Mitochondrial pyruvate carrier 2 OS=Rattus norvegicus OX=10116 GN=Mpc2 PE=2 SV=1	-0.304006	0.497573								ADP-ribosylation factor 5 OS=Rattus norvegicus OX=10116 GN=Arf5 PE=1 SV=2	-0.205896	0.207218
						RNA-binding motif protein, X chromosome OS=Rattus norvegicus OX=10116 GN=Rbmx PE=1 SV=1	-0.304006	0.747147								ATP-citrate synthase OS=Rattus norvegicus OX=10116 GN=Acly PE=1 SV=1	-0.204233	0.0515207
						Cytochrome b-c1 complex subunit Rieske, mitochondrial OS=Rattus norvegicus OX=10116 GN=Uqcrfs1 PE=1 SV=2	-0.304006	0.962574								Serum amyloid P-component OS=Rattus norvegicus OX=10116 GN=Apcs PE=2 SV=2	-0.202572	0.234054
						Toll-interacting protein OS=Rattus norvegicus OX=10116 GN=Tollip PE=1 SV=1	-0.304006	0.966576								NMDA receptor synaptonuclear-signaling and neuronal migration factor OS=Rattus norvegicus OX=10116 GN=Nsmf PE=1 SV=3	-0.199255	0.571387
						4-nitrophenylphosphatase domain and non-neuronal SNAP25-like protein homolog 1 (C. elegans), isoform CRA_b OS=Rattus norvegicus OX=10116 GN=Nipsnap1 PE=1 SV=1	-0.304006	1.12205								Proteasome 26S subunit, ATPase 6 OS=Rattus norvegicus OX=10116 GN=Psmc6 PE=1 SV=1	-0.199255	0.0279197
						60S acidic ribosomal protein P0 OS=Rattus norvegicus OX=10116 GN=Rplp0 PE=1 SV=2	-0.304006	1.46471								Bat4 OS=Rattus norvegicus OX=10116 GN=Gpank1 PE=4 SV=1	-0.1976	0.145127
						Coatomer subunit epsilon OS=Rattus norvegicus OX=10116 GN=Cope PE=1 SV=3	-0.286304	0.0241089								Gamma-aminobutyric acid receptor subunit beta-3 OS=Rattus norvegicus OX=10116 GN=Gabrb3 PE=1 SV=1	-0.1976	0.0221421
						Musashi RNA-binding protein 2 OS=Rattus norvegicus OX=10116 GN=Msi2 PE=1 SV=3	-0.286304	0.0310503								Signal peptide, CUB domain and EGF-like domain-containing 2 OS=Rattus norvegicus OX=10116 GN=Scube2 PE=4 SV=3	-0.192645	0.301612
						NADPH--cytochrome P450 reductase OS=Rattus norvegicus OX=10116 GN=Por PE=1 SV=3	-0.286304	0.104577								Tropomyosin 1, alpha, isoform CRA_p OS=Rattus norvegicus OX=10116 GN=Tpm1 PE=1 SV=1	-0.192645	0.0791161
						Lactamase, beta OS=Rattus norvegicus OX=10116 GN=Lactb PE=1 SV=1	-0.286304	0.114639								GABA-BR1i receptor OS=Rattus norvegicus OX=10116 GN=Gabbr1 PE=1 SV=1	-0.190997	0.523393
						Histone H2A type 3 OS=Rattus norvegicus OX=10116 PE=2 SV=3	-0.286304	0.121478								Heparin cofactor 2 OS=Rattus norvegicus OX=10116 GN=Serpind1 PE=1 SV=1	-0.189351	0.0690825
						Peptidyl-prolyl cis-trans isomerase FKBP1A OS=Rattus norvegicus OX=10116 GN=Fkbp1a PE=1 SV=3	-0.286304	0.238824								T-complex protein 1 subunit alpha OS=Rattus norvegicus OX=10116 GN=Tcp1 PE=1 SV=1	-0.186065	0.14443
						40S ribosomal protein S27 OS=Rattus norvegicus OX=10116 GN=Rps27 PE=1 SV=3	-0.286304	0.289883								Tubulin beta-2B chain OS=Rattus norvegicus OX=10116 GN=Tubb2b PE=1 SV=1	-0.186065	0.0241893
						Vesicle-associated membrane protein-associated protein A OS=Rattus norvegicus OX=10116 GN=Vapa PE=1 SV=3	-0.286304	0.339135								60S ribosomal protein L29 OS=Rattus norvegicus OX=10116 PE=3 SV=3	-0.184425	0.0481015
						40S ribosomal protein S27-like OS=Rattus norvegicus OX=10116 GN=Rps27l PE=1 SV=3	-0.286304	0.431798								Septin OS=Rattus norvegicus OX=10116 GN=Sept7 PE=1 SV=3	-0.182786	0.0152995
						Diacylglycerol kinase OS=Rattus norvegicus OX=10116 GN=Dgkb PE=1 SV=2	-0.286304	0.442493								Dihydropyrimidinase-related protein 2 OS=Rattus norvegicus OX=10116 GN=Dpysl2 PE=1 SV=1	-0.179515	0.146103
						Unconventional myosin-Va OS=Rattus norvegicus OX=10116 GN=Myo5a PE=1 SV=1	-0.286304	0.498941								Peptidyl-prolyl cis-trans isomerase B OS=Rattus norvegicus OX=10116 GN=Ppib PE=1 SV=3	-0.176251	0.317346
						RCG25684, isoform CRA_a OS=Rattus norvegicus OX=10116 GN=Tmod3 PE=1 SV=1	-0.286304	0.600326								Histone deacetylase 1 OS=Rattus norvegicus OX=10116 GN=Hdac1l PE=3 SV=3	-0.174621	0.0993429
						Hypothetical protein LOC681410 OS=Rattus norvegicus OX=10116 GN=LOC681410 PE=1 SV=3	-0.286304	0.665546								Chaperonin containing Tcp1, subunit 6A (Zeta 1) OS=Rattus norvegicus OX=10116 GN=Cct6a PE=1 SV=1	-0.168123	0.724597
						Serine/threonine-protein phosphatase PP1-gamma catalytic subunit OS=Rattus norvegicus OX=10116 GN=Ppp1cc PE=1 SV=1	-0.286304	0.737549								Casein kinase II subunit beta OS=Rattus norvegicus OX=10116 GN=Csnk2b PE=1 SV=1	-0.164884	0.215414
						60S ribosomal protein L21 OS=Rattus norvegicus OX=10116 PE=3 SV=1	-0.286304	0.739929								Similar to hypothetical protein A530094D01 OS=Rattus norvegicus OX=10116 GN=RGD1306556 PE=1 SV=1	-0.164884	0.0993606
						60S ribosomal protein L4 OS=Rattus norvegicus OX=10116 GN=Rpl4 PE=1 SV=1	-0.286304	0.782516								Serine protease HTRA1 OS=Rattus norvegicus OX=10116 GN=Htra1 PE=2 SV=1	-0.163268	0.196674
						AP-2 complex subunit mu OS=Rattus norvegicus OX=10116 GN=Ap2m1 PE=1 SV=1	-0.286304	0.974694								Proteasome (Prosome, macropain) 26S subunit, non-ATPase, 3 OS=Rattus norvegicus OX=10116 GN=Psmd3 PE=1 SV=1	-0.163268	0.0888695
						Adenylate kinase 4, mitochondrial OS=Rattus norvegicus OX=10116 GN=Ak4 PE=2 SV=1	-0.268817	0.0186345								Receptor protein-tyrosine kinase OS=Rattus norvegicus OX=10116 GN=Ephb2 PE=1 SV=1	-0.161653	0.25138
						Aldehyde dehydrogenase, mitochondrial OS=Rattus norvegicus OX=10116 GN=Aldh2 PE=1 SV=1	-0.268817	0.02365								Glyceraldehyde-3-phosphate dehydrogenase OS=Rattus norvegicus OX=10116 GN=Gapdh PE=1 SV=3	-0.16004	0.128712
						RNA helicase OS=Rattus norvegicus OX=10116 GN=Ddx6 PE=1 SV=1	-0.268817	0.128427								Keratin, type II cytoskeletal 5 OS=Rattus norvegicus OX=10116 GN=Krt5 PE=1 SV=1	-0.15682	0.0265704
						Uncharacterized protein OS=Rattus norvegicus OX=10116 PE=3 SV=1	-0.268817	0.163043								Elongation factor 1-alpha OS=Rattus norvegicus OX=10116 GN=LOC100360413 PE=3 SV=1	-0.153607	0.708283
						RAB11 family-interacting protein 5 OS=Rattus norvegicus OX=10116 GN=Rab11fip5 PE=1 SV=1	-0.268817	0.167491								Dynein, axonemal, heavy chain 2 OS=Rattus norvegicus OX=10116 GN=Dnah2 PE=3 SV=1	-0.153607	0.19903
						Shisa family member 6 OS=Rattus norvegicus OX=10116 GN=Shisa6 PE=1 SV=3	-0.268817	0.263603								Phosphate carrier protein, mitochondrial OS=Rattus norvegicus OX=10116 GN=Slc25a3 PE=1 SV=1	-0.153607	0.0702583
						Neurochondrin OS=Rattus norvegicus OX=10116 GN=Ncdn PE=1 SV=2	-0.268817	0.272459								Sorbin and SH3 domain-containing protein 2 OS=Rattus norvegicus OX=10116 GN=Sorbs2 PE=1 SV=2	-0.153607	0.0232258
						Family with sequence similarity 120C OS=Rattus norvegicus OX=10116 GN=FAM120C PE=1 SV=1	-0.268817	0.272459								Protein lin-7 homolog OS=Rattus norvegicus OX=10116 GN=Lin7a PE=1 SV=2	-0.152003	0.460322
						Isoleucyl-tRNA synthetase OS=Rattus norvegicus OX=10116 GN=Iars PE=1 SV=2	-0.268817	0.273273								60S ribosomal protein L22 OS=Rattus norvegicus OX=10116 GN=LOC100360057 PE=1 SV=1	-0.147202	0.499227
						Abl interactor 1 OS=Rattus norvegicus OX=10116 GN=Abi1 PE=1 SV=3	-0.268817	0.293282								Carboxypeptidase E OS=Rattus norvegicus OX=10116 GN=Cpe PE=1 SV=1	-0.147202	0.0241893
						Histidine ammonia-lyase OS=Rattus norvegicus OX=10116 GN=Hal PE=1 SV=1	-0.268817	0.327902								Long-chain fatty acid transport protein 1 OS=Rattus norvegicus OX=10116 GN=Slc27a1 PE=1 SV=1	-0.145605	0.177553
						Similar to Myosin light chain 1 slow a (Predicted) OS=Rattus norvegicus OX=10116 GN=RGD1560334_predicted PE=4 SV=1	-0.268817	0.352617								AP-2 complex subunit sigma OS=Rattus norvegicus OX=10116 GN=Ap2s1 PE=1 SV=1	-0.14401	0.272644
						Sodium/potassium-transporting ATPase subunit beta-1 OS=Rattus norvegicus OX=10116 GN=Atp1b1 PE=1 SV=1	-0.268817	0.464706								Phosphoglycerate kinase 1 OS=Rattus norvegicus OX=10116 GN=Pgk1 PE=1 SV=2	-0.14401	0.215414
						Coronin-1A OS=Rattus norvegicus OX=10116 GN=Coro1a PE=1 SV=3	-0.268817	0.534617								BTB domain-containing 8 OS=Rattus norvegicus OX=10116 GN=Btbd8 PE=4 SV=1	-0.14401	0.153525
						Microtubule-associated protein OS=Rattus norvegicus OX=10116 GN=Mapt PE=1 SV=1	-0.268817	0.539102								Cathepsin D OS=Rattus norvegicus OX=10116 GN=Ctsd PE=1 SV=1	-0.14401	0.0121416
						Phosphatidylinositol transfer protein alpha isoform OS=Rattus norvegicus OX=10116 GN=Pitpna PE=1 SV=1	-0.268817	0.609065								Plasminogen OS=Rattus norvegicus OX=10116 GN=Plg PE=2 SV=2	-0.142417	0.118077
						Similar to Vacuolar protein sorting 26 homolog (VPS26 protein homolog), isoform CRA_a OS=Rattus norvegicus OX=10116 GN=Vps26b PE=1 SV=1	-0.268817	0.669586								G3BP stress granule assembly factor 2 OS=Rattus norvegicus OX=10116 GN=G3bp2 PE=1 SV=1	-0.142417	0.0221421
						60S ribosomal protein L7a OS=Rattus norvegicus OX=10116 GN=LOC108349606 PE=3 SV=1	-0.268817	0.752027								60S ribosomal protein L18 OS=Rattus norvegicus OX=10116 GN=Rpl18 PE=1 SV=2	-0.139236	0.0579463
						Fascin OS=Rattus norvegicus OX=10116 GN=Fscn1 PE=1 SV=2	-0.268817	0.815309								BRISC and BRCA1-A complex member 2 OS=Rattus norvegicus OX=10116 GN=Babam2 PE=1 SV=1	-0.137648	0.119441
						Disabled homolog 1 OS=Rattus norvegicus OX=10116 GN=Dab1 PE=1 SV=1	-0.268817	0.869666								14-3-3 protein epsilon OS=Rattus norvegicus OX=10116 GN=Ywhae PE=1 SV=1	-0.129734	0.276298
						Coatomer subunit alpha OS=Rattus norvegicus OX=10116 GN=Copa PE=1 SV=1	-0.268817	0.966576								Gephyrin OS=Rattus norvegicus OX=10116 GN=Gphn PE=1 SV=3	-0.129734	0.148583
						Serine/arginine-rich splicing factor 1 OS=Rattus norvegicus OX=10116 GN=Srsf1 PE=1 SV=1	-0.268817	0.995679								Retrotransposon Gag-like 9 OS=Rattus norvegicus OX=10116 GN=Rtl9 PE=4 SV=2	-0.129734	0.0391401
						Tripartite motif protein 3, isoform CRA_a OS=Rattus norvegicus OX=10116 GN=Trim3 PE=1 SV=1	-0.268817	1.32975								DUF4592 domain-containing protein OS=Rattus norvegicus OX=10116 GN=RGD1310819 PE=1 SV=3	-0.128156	0.0993429
						AP-2 complex subunit beta OS=Rattus norvegicus OX=10116 GN=Ap2b1 PE=1 SV=1	-0.268817	1.53313								Sodium/potassium-transporting ATPase subunit beta-1 OS=Rattus norvegicus OX=10116 GN=Atp1b1 PE=1 SV=1	-0.128156	0.0221421
						Sodium- and chloride-dependent GABA transporter 3 OS=Rattus norvegicus OX=10116 GN=Slc6a11 PE=1 SV=1	-0.251539	0.0783135								60S ribosomal protein L18a OS=Rattus norvegicus OX=10116 GN=Rpl18a PE=2 SV=1	-0.128156	0.00471915
						Multifunctional protein ADE2 OS=Rattus norvegicus OX=10116 GN=Paics PE=1 SV=3	-0.251539	0.0809219								26S proteasome regulatory subunit 8 OS=Rattus norvegicus OX=10116 GN=Psmc5 PE=1 SV=1	-0.12658	0.0637466
						Gamma-aminobutyric acid receptor-associated protein-like 2 OS=Rattus norvegicus OX=10116 GN=Gabarapl2 PE=3 SV=1	-0.251539	0.08302								Fatty acid synthase OS=Rattus norvegicus OX=10116 GN=Fasn PE=1 SV=3	-0.125006	0.0952765
						Calmodulin-regulated spectrin-associated protein 1 OS=Rattus norvegicus OX=10116 GN=Camsap1 PE=1 SV=1	-0.251539	0.10902								Complement subcomponent C1r OS=Rattus norvegicus OX=10116 GN=C1r PE=1 SV=1	-0.125006	0.0020606
						Coiled-coil-helix-coiled-coil-helix domain containing 3 (Predicted), isoform CRA_a OS=Rattus norvegicus OX=10116 GN=Chchd3 PE=1 SV=1	-0.251539	0.172631								DIRAS family GTPase 2 OS=Rattus norvegicus OX=10116 GN=Diras2 PE=4 SV=1	-0.120294	0.238786
						Ras-related protein Rab-18 OS=Rattus norvegicus OX=10116 GN=Rab18 PE=2 SV=1	-0.251539	0.186419								Ras-related protein Rab-11A OS=Rattus norvegicus OX=10116 GN=Rab11a PE=1 SV=3	-0.120294	0.0963533
						Dolichyl-diphosphooligosaccharide--protein glycosyltransferase 48 kDa subunit OS=Rattus norvegicus OX=10116 GN=Ddost PE=2 SV=1	-0.251539	0.238072								Reticulocalbin-2 OS=Rattus norvegicus OX=10116 GN=Rcn2 PE=1 SV=2	-0.118727	0.0689176
						Eukaryotic translation initiation factor 4B OS=Rattus norvegicus OX=10116 GN=Eif4b PE=1 SV=1	-0.251539	0.247184								40S ribosomal protein S17 OS=Rattus norvegicus OX=10116 GN=LOC100362366 PE=3 SV=1	-0.117161	0.0791161
						Vesicle-trafficking protein SEC22b OS=Rattus norvegicus OX=10116 GN=Sec22b PE=1 SV=3	-0.251539	0.266001								Coatomer subunit gamma OS=Rattus norvegicus OX=10116 GN=Copg1 PE=1 SV=1	-0.117161	0.0208977
						Heat shock cognate 71 kDa protein OS=Rattus norvegicus OX=10116 GN=Hspa8 PE=1 SV=1	-0.251539	0.355561								26S proteasome non-ATPase regulatory subunit 6 OS=Rattus norvegicus OX=10116 GN=Psmd6 PE=1 SV=1	-0.115597	0.118077
						Interleukin-10 OS=Rattus norvegicus OX=10116 GN=Il10 PE=2 SV=1	-0.251539	0.414539								Ig-like domain-containing protein OS=Rattus norvegicus OX=10116 PE=1 SV=1	-0.114035	0.116651
						Malate dehydrogenase, cytoplasmic OS=Rattus norvegicus OX=10116 GN=Mdh1 PE=1 SV=3	-0.251539	0.425969								Signal-induced proliferation-associated 1 like 1, isoform CRA_b OS=Rattus norvegicus OX=10116 GN=Sipa1l1 PE=1 SV=1	-0.114035	0.0595607
						Cytochrome c oxidase subunit 2 OS=Rattus norvegicus OX=10116 GN=Mtco2 PE=1 SV=3	-0.251539	0.455932								Calcium/calmodulin-dependent protein kinase OS=Rattus norvegicus OX=10116 GN=Camk2b PE=1 SV=1	-0.112475	0.268331
						Monocarboxylate transporter 1 OS=Rattus norvegicus OX=10116 GN=Slc16a1 PE=1 SV=1	-0.251539	0.458421								Unconventional myosin-XVIIIa OS=Rattus norvegicus OX=10116 GN=Myo18a PE=1 SV=1	-0.110916	0.363138
						Signal-induced proliferation-associated 1-like protein 2 OS=Rattus norvegicus OX=10116 GN=Sipa1l2 PE=1 SV=3	-0.251539	0.514279								Elongation factor 1-gamma OS=Rattus norvegicus OX=10116 GN=Eef1g PE=2 SV=3	-0.107803	0.18159
						Receptor expression-enhancing protein OS=Rattus norvegicus OX=10116 GN=Reep2 PE=3 SV=1	-0.251539	0.661544								Actin filament-associated protein 1 OS=Rattus norvegicus OX=10116 GN=Afap1 PE=1 SV=1	-0.103147	0.306236
						ATP-binding cassette sub-family D member 3 OS=Rattus norvegicus OX=10116 GN=Abcd3 PE=1 SV=3	-0.251539	0.730487								MIF4G domain-containing protein OS=Rattus norvegicus OX=10116 GN=Mif4gd PE=2 SV=1	-0.103147	0.296231
						60S ribosomal protein L9 OS=Rattus norvegicus OX=10116 GN=LOC103692829 PE=3 SV=1	-0.251539	0.876148								Sarcoplasmic/endoplasmic reticulum calcium ATPase 2 OS=Rattus norvegicus OX=10116 GN=Atp2a2 PE=1 SV=1	-0.101598	0.234054
						Heterogeneous nuclear ribonucleoprotein H OS=Rattus norvegicus OX=10116 GN=Hnrnph1 PE=1 SV=1	-0.234465	0.0287242								Rho GTPase-activating protein 23 OS=Rattus norvegicus OX=10116 GN=Arhgap23 PE=1 SV=3	-0.100051	0.0792895
						ADP-ribosylation factor-like protein 1 OS=Rattus norvegicus OX=10116 GN=Arl1 PE=1 SV=1	-0.234465	0.0287242								Centrosomal protein 170B OS=Rattus norvegicus OX=10116 GN=Cep170b PE=1 SV=1	-0.0985055	0.377351
						BRISC and BRCA1-A complex member 2 OS=Rattus norvegicus OX=10116 GN=Babam2 PE=1 SV=1	-0.234465	0.0491485								Multifunctional protein ADE2 OS=Rattus norvegicus OX=10116 GN=Paics PE=1 SV=3	-0.0985055	0.150161
						60 kDa poly(U)-binding-splicing factor OS=Rattus norvegicus OX=10116 GN=Puf60 PE=1 SV=1	-0.234465	0.0670192								Leucine rich repeat containing 28 (Predicted), isoform CRA_d OS=Rattus norvegicus OX=10116 GN=Lrrc28 PE=4 SV=1	-0.0969617	0.170464
						Nucleosome assembly protein 1-like 1 OS=Rattus norvegicus OX=10116 GN=Nap1l1 PE=1 SV=1	-0.234465	0.0809219								Ba1-643 OS=Rattus norvegicus OX=10116 GN=LOC498750 PE=2 SV=1	-0.0969617	0.00623397
						Lactadherin OS=Rattus norvegicus OX=10116 GN=Mfge8 PE=1 SV=1	-0.234465	0.0899095								Collagen-binding protein OS=Rattus norvegicus OX=10116 GN=Serpinh1 PE=1 SV=1	-0.0954196	0.0230915
						Anion exchange protein OS=Rattus norvegicus OX=10116 GN=Slc4a10 PE=1 SV=1	-0.234465	0.19044								Globin a4 OS=Rattus norvegicus OX=10116 GN=Hbb PE=1 SV=1	-0.093879	0.221082
						Protein NDRG2 OS=Rattus norvegicus OX=10116 GN=Ndrg2 PE=1 SV=1	-0.234465	0.44855								Sodium/potassium-transporting ATPase subunit alpha-2 OS=Rattus norvegicus OX=10116 GN=Atp1a2 PE=1 SV=1	-0.093879	0.174771
						ATP synthase subunit f, mitochondrial OS=Rattus norvegicus OX=10116 GN=Atp5mf PE=1 SV=1	-0.234465	0.453457								Peptidyl-prolyl cis-trans isomerase A OS=Rattus norvegicus OX=10116 GN=Ppia PE=1 SV=2	-0.093879	0.0689176
						Long-chain-fatty-acid--CoA ligase ACSBG1 OS=Rattus norvegicus OX=10116 GN=Acsbg1 PE=1 SV=1	-0.234465	0.455932								Serine/threonine-protein kinase DCLK2 OS=Rattus norvegicus OX=10116 GN=Dclk2 PE=1 SV=3	-0.093879	0.0574234
						Ig-like domain-containing protein OS=Rattus norvegicus OX=10116 PE=1 SV=2	-0.234465	0.468521								Syntenin-1 OS=Rattus norvegicus OX=10116 GN=Sdcbp PE=1 SV=1	-0.093879	0.00645115
						Unconventional myosin-Va OS=Rattus norvegicus OX=10116 GN=Myo5a PE=1 SV=1	-0.234465	0.501689								Glutathione transferase OS=Rattus norvegicus OX=10116 GN=Gstm1 PE=1 SV=2	-0.0923402	0.0964237
						G protein subunit alpha 14 OS=Rattus norvegicus OX=10116 GN=Gna14 PE=2 SV=1	-0.234465	0.501689								Protein rogdi homolog OS=Rattus norvegicus OX=10116 GN=Rogdi PE=1 SV=1	-0.0908029	0.0392742
						Cytochrome b-c1 complex subunit 2, mitochondrial OS=Rattus norvegicus OX=10116 GN=Uqcrc2 PE=1 SV=2	-0.234465	0.688246								RNA helicase OS=Rattus norvegicus OX=10116 GN=Dhx30 PE=1 SV=1	-0.0892673	0.0715768
						DnaJ heat shock protein family (Hsp40) member B5 OS=Rattus norvegicus OX=10116 GN=Dnajb5 PE=4 SV=1	-0.234465	0.759451								Shisa family member 6 OS=Rattus norvegicus OX=10116 GN=Shisa6 PE=1 SV=3	-0.0846703	0.0167817
						Lethal(2) giant larvae protein homolog 1 OS=Rattus norvegicus OX=10116 GN=Llgl1 PE=1 SV=1	-0.217591	0.0443122								Janus kinase and microtubule-interacting protein 2 OS=Rattus norvegicus OX=10116 GN=Jakmip2 PE=1 SV=1	-0.0846703	0.00623397
						Microtubule-associated proteins 1A/1B light chain 3A OS=Rattus norvegicus OX=10116 GN=Map1lc3a PE=1 SV=1	-0.217591	0.203426								Complement C7 OS=Rattus norvegicus OX=10116 GN=C7 PE=1 SV=1	-0.0816138	0.126264
						DIRAS family GTPase 2 OS=Rattus norvegicus OX=10116 GN=Diras2 PE=4 SV=1	-0.217591	0.216096								Tetratricopeptide repeat domain 7B OS=Rattus norvegicus OX=10116 GN=Ttc7b PE=1 SV=3	-0.0816138	0.0104268
						Trafficking protein particle complex subunit 3 OS=Rattus norvegicus OX=10116 GN=Trappc3 PE=2 SV=1	-0.217591	0.218245								Nedd4 family-interacting protein 2 OS=Rattus norvegicus OX=10116 GN=Ndfip2 PE=4 SV=2	-0.0800879	0.40851
						Sorting nexin 12 OS=Rattus norvegicus OX=10116 GN=Snx12 PE=1 SV=1	-0.217591	0.248721								Reticulon-4 OS=Rattus norvegicus OX=10116 GN=Rtn4 PE=1 SV=1	-0.0800879	0.215414
						Potassium voltage-gated channel subfamily D member 2 OS=Rattus norvegicus OX=10116 GN=Kcnd2 PE=1 SV=1	-0.217591	0.359519								Tyrosine-protein phosphatase non-receptor type OS=Rattus norvegicus OX=10116 GN=Ptpn3 PE=1 SV=1	-0.0800879	0.0515207
						Slit homolog 3 protein OS=Rattus norvegicus OX=10116 GN=Slit3 PE=2 SV=1	-0.217591	0.376751								Rho GTPase-activating protein 39 OS=Rattus norvegicus OX=10116 GN=Arhgap39 PE=1 SV=1	-0.0800879	0.0232258
						Oxysterol-binding protein OS=Rattus norvegicus OX=10116 GN=Osbpl8 PE=1 SV=1	-0.217591	0.393619								Ras-related protein Ral-A OS=Rattus norvegicus OX=10116 GN=Rala PE=1 SV=1	-0.077041	0.160627
						Heterogeneous nuclear ribonucleoprotein Q OS=Rattus norvegicus OX=10116 GN=Syncrip PE=2 SV=1	-0.217591	0.404504								60S ribosomal protein L34 OS=Rattus norvegicus OX=10116 GN=Rpl34 PE=1 SV=1	-0.077041	0.0940628
						Nucleophosmin OS=Rattus norvegicus OX=10116 GN=Npm1 PE=1 SV=1	-0.217591	0.441291								Ceruloplasmin OS=Rattus norvegicus OX=10116 GN=Cp PE=1 SV=3	-0.0724828	0.361034
						Drebrin OS=Rattus norvegicus OX=10116 GN=Dbn1 PE=1 SV=1	-0.217591	0.443697								Serine/threonine-protein phosphatase 2A 56 kDa regulatory subunit beta isoform OS=Rattus norvegicus OX=10116 GN=Ppp2r5b PE=2 SV=1	-0.0709665	0.160627
						Signal-induced proliferation-associated 1 like 1, isoform CRA_b OS=Rattus norvegicus OX=10116 GN=Sipa1l1 PE=1 SV=1	-0.217591	0.50307								RNA transcription, translation and transport factor protein OS=Rattus norvegicus OX=10116 GN=Rtraf PE=1 SV=1	-0.0694519	0.0940628
						Solute carrier family 12 member 5 OS=Rattus norvegicus OX=10116 GN=Slc12a5 PE=1 SV=2	-0.217591	0.534617								Clathrin light chain OS=Rattus norvegicus OX=10116 GN=Clta PE=1 SV=1	-0.0634092	0.334981
						Dynein light chain 2, cytoplasmic OS=Rattus norvegicus OX=10116 GN=Dynll2 PE=1 SV=1	-0.217591	0.539102								Carboxypeptidase B2 OS=Rattus norvegicus OX=10116 GN=Cpb2 PE=2 SV=1	-0.0634092	0.0152995
						Ras-related C3 botulinum toxin substrate 1 OS=Rattus norvegicus OX=10116 GN=Rac1 PE=1 SV=1	-0.217591	0.578396								40S ribosomal protein S4 OS=Rattus norvegicus OX=10116 GN=Rps4x PE=1 SV=1	-0.0603973	0.010164
						Immunoglobulin superfamily, member 8 OS=Rattus norvegicus OX=10116 GN=Igsf8 PE=1 SV=1	-0.217591	0.643974								Interleukin-1 receptor accessory protein OS=Rattus norvegicus OX=10116 GN=Il1rap PE=1 SV=2	-0.0573917	0.0940628
						Leucine-rich repeat-containing protein 59 OS=Rattus norvegicus OX=10116 GN=Lrrc59 PE=1 SV=1	-0.217591	0.869666								Ig-like domain-containing protein OS=Rattus norvegicus OX=10116 PE=1 SV=1	-0.0558912	0.00342487
						Clathrin coat assembly protein AP180 OS=Rattus norvegicus OX=10116 GN=Snap91 PE=1 SV=1	-0.200913	0.02365								Ig-like domain-containing protein OS=Rattus norvegicus OX=10116 PE=4 SV=2	-0.0513992	0.0133328
						Paralemmin-1 OS=Rattus norvegicus OX=10116 GN=Palm PE=1 SV=1	-0.200913	0.0660068								Non-specific serine/threonine protein kinase OS=Rattus norvegicus OX=10116 GN=Mast4 PE=1 SV=3	-0.0484122	0.137687
						V-type proton ATPase subunit D OS=Rattus norvegicus OX=10116 GN=Atp6v1d PE=1 SV=1	-0.200913	0.101824								RNA 3'-terminal phosphate cyclase OS=Rattus norvegicus OX=10116 GN=Rtca PE=1 SV=1	-0.0484122	0.107004
						Cell division control protein 42 homolog OS=Rattus norvegicus OX=10116 GN=Cdc42 PE=1 SV=2	-0.200913	0.121478								MAGUK p55 subfamily member 3 OS=Rattus norvegicus OX=10116 GN=Mpp3 PE=1 SV=3	-0.0454314	0.160627
						Bifunctional purine biosynthesis protein ATIC OS=Rattus norvegicus OX=10116 GN=Atic PE=1 SV=2	-0.200913	0.238072								Low-density lipoprotein receptor-related protein 2 OS=Rattus norvegicus OX=10116 GN=Lrp2 PE=1 SV=1	-0.0424568	0.0279197
						RNA helicase OS=Rattus norvegicus OX=10116 GN=Dhx15 PE=1 SV=1	-0.200913	0.244888								14-3-3 protein zeta/delta OS=Rattus norvegicus OX=10116 GN=Ywhaz PE=1 SV=1	-0.0394883	0.356691
						Actin-binding LIM protein 2 OS=Rattus norvegicus OX=10116 GN=Ablim2 PE=1 SV=1	-0.200913	0.355561								40S ribosomal protein S3 OS=Rattus norvegicus OX=10116 GN=Rps3 PE=1 SV=1	-0.0394883	0.128712
						Alpha-actinin-4 OS=Rattus norvegicus OX=10116 GN=Actn4 PE=1 SV=1	-0.200913	0.36251								7-dehydrocholesterol reductase OS=Rattus norvegicus OX=10116 GN=Dhcr7 PE=1 SV=1	-0.0394883	0.0993429
						Sorbin and SH3 domain-containing protein 1 OS=Rattus norvegicus OX=10116 GN=Sorbs1 PE=1 SV=1	-0.200913	0.41005								Uncharacterized protein OS=Rattus norvegicus OX=10116 PE=1 SV=3	-0.0335695	0.106561
						Microtubule-associated protein OS=Rattus norvegicus OX=10116 GN=Map4 PE=1 SV=1	-0.200913	0.585027								Alpha-2-macroglobulin OS=Rattus norvegicus OX=10116 GN=A2m PE=2 SV=2	-0.0335695	0.0579463
						ATP synthase subunit gamma, mitochondrial OS=Rattus norvegicus OX=10116 GN=Atp5f1c PE=1 SV=2	-0.200913	0.966576								Rap guanine nucleotide exchange factor 4 OS=Rattus norvegicus OX=10116 GN=Rapgef4 PE=1 SV=3	-0.0335695	0.0512733
						Phosphoglycerate mutase 1 OS=Rattus norvegicus OX=10116 GN=Pgam1 PE=1 SV=4	-0.184425	0.0181814								Synaptotagmin-5 OS=Rattus norvegicus OX=10116 GN=Syt5 PE=1 SV=1	-0.0320936	0.299211
						Fibrillin 2 OS=Rattus norvegicus OX=10116 GN=Fbn2 PE=3 SV=3	-0.184425	0.0560111								Carnitine O-palmitoyltransferase 1, liver isoform OS=Rattus norvegicus OX=10116 GN=Cpt1a PE=1 SV=2	-0.0320936	0.064557
						Transcriptional activator protein Pur-alpha OS=Rattus norvegicus OX=10116 GN=Pura PE=1 SV=3	-0.184425	0.0579919								Inter-alpha trypsin inhibitor, heavy chain 1 OS=Rattus norvegicus OX=10116 GN=Itih1 PE=1 SV=1	-0.0306192	0.0940628
						DnaJ homolog subfamily A member 1 OS=Rattus norvegicus OX=10116 GN=Dnaja1 PE=1 SV=1	-0.184425	0.0624821								60S ribosomal protein L39 OS=Rattus norvegicus OX=10116 GN=Rpl39 PE=1 SV=2	-0.027675	0.102122
						Coatomer subunit beta OS=Rattus norvegicus OX=10116 GN=Copb1 PE=1 SV=1	-0.184425	0.0670192								Pre-mRNA processing factor 8, isoform CRA_a OS=Rattus norvegicus OX=10116 GN=Prpf8 PE=1 SV=1	-0.0262051	0.0200581
						Fascin OS=Rattus norvegicus OX=10116 GN=Fscn1 PE=1 SV=1	-0.184425	0.0846002								Annexin A2 OS=Rattus norvegicus OX=10116 GN=Anxa2 PE=1 SV=2	-0.0247367	0.11864
						Histone H3.3 OS=Rattus norvegicus OX=10116 GN=H3-3b PE=1 SV=2	-0.184425	0.117475								ADP-ribosylation factor 3 OS=Rattus norvegicus OX=10116 GN=Arf3 PE=2 SV=2	-0.0203404	0.0689176
						Ubiquitin-like modifier-activating enzyme 1 OS=Rattus norvegicus OX=10116 GN=Uba1 PE=1 SV=1	-0.184425	0.120331								Heat shock protein HSP 90-alpha OS=Rattus norvegicus OX=10116 GN=Hsp90aa1 PE=1 SV=3	-0.018878	0.029397
						ATPase, H+ transporting, V1 subunit E isoform 1, isoform CRA_a OS=Rattus norvegicus OX=10116 GN=Atp6v1e1 PE=1 SV=1	-0.184425	0.143271								Ig-like domain-containing protein OS=Rattus norvegicus OX=10116 PE=1 SV=1	-0.0174171	0.119441
						Succinyl-CoA:3-ketoacid coenzyme A transferase 1, mitochondrial OS=Rattus norvegicus OX=10116 GN=Oxct1 PE=1 SV=1	-0.184425	0.195179								Mitochondrial 2-oxoglutarate/malate carrier protein OS=Rattus norvegicus OX=10116 GN=Slc25a11 PE=1 SV=1	-0.0144996	0.0720324
						S-phase kinase-associated protein 1 OS=Rattus norvegicus OX=10116 GN=Skp1 PE=1 SV=1	-0.184425	0.329754								Microtubule-associated protein 6 OS=Rattus norvegicus OX=10116 GN=Map6 PE=1 SV=1	-0.013043	0.100508
						Disks large-associated protein 3 OS=Rattus norvegicus OX=10116 GN=Dlgap3 PE=1 SV=2	-0.184425	0.388277								60S ribosomal protein L11 OS=Rattus norvegicus OX=10116 GN=Rpl11 PE=1 SV=2	-0.013043	0.0210786
						Calnexin OS=Rattus norvegicus OX=10116 GN=Canx PE=1 SV=1	-0.184425	0.455932								Chromodomain-helicase-DNA-binding protein 8 OS=Rattus norvegicus OX=10116 GN=Chd8 PE=1 SV=2	-0.011588	0.107433
						Alpha-1,3/1,6-mannosyltransferase ALG2 OS=Rattus norvegicus OX=10116 GN=Alg2 PE=1 SV=1	-0.184425	0.478862								Syntaxin-1B OS=Rattus norvegicus OX=10116 GN=Stx1b PE=1 SV=1	-0.0101344	0.135776
						AP-2 complex subunit alpha OS=Rattus norvegicus OX=10116 GN=Ap2a1 PE=1 SV=1	-0.184425	0.501689								Keratin, type I cytoskeletal 14 OS=Rattus norvegicus OX=10116 GN=Krt14 PE=2 SV=1	-0.0101344	0.07643
						60S ribosomal protein L18 OS=Rattus norvegicus OX=10116 GN=Rpl18 PE=1 SV=2	-0.184425	0.565431								60 kDa heat shock protein, mitochondrial OS=Rattus norvegicus OX=10116 GN=Hspd1 PE=1 SV=1	-0.00868224	0.0246759
						60S ribosomal protein L6 OS=Rattus norvegicus OX=10116 GN=Rpl6 PE=1 SV=5	-0.184425	0.696804								Voltage-dependent anion-selective channel protein 2 OS=Rattus norvegicus OX=10116 GN=Vdac2 PE=1 SV=2	-0.00723157	0.0807512
						Glutathione peroxidase 1 OS=Rattus norvegicus OX=10116 GN=Gpx1 PE=1 SV=4	-0.168123	0.0101054								C3/C5 convertase OS=Rattus norvegicus OX=10116 GN=Cfb PE=1 SV=1	-0.00723157	0.00645115
						Spectrin beta chain OS=Rattus norvegicus OX=10116 GN=Sptbn4 PE=1 SV=1	-0.168123	0.0443122								RNA helicase OS=Rattus norvegicus OX=10116 GN=Ddx3y PE=1 SV=1	-0.00144342	0.109636
						E3 ubiquitin-protein ligase TTC3 OS=Rattus norvegicus OX=10116 GN=Ttc3 PE=3 SV=3	-0.168123	0.051587								Coronin-1B OS=Rattus norvegicus OX=10116 GN=Coro1b PE=1 SV=1	0.00288251	0.0265704
						Endoplasmic reticulum chaperone BiP OS=Rattus norvegicus OX=10116 GN=Hspa5 PE=1 SV=1	-0.168123	0.0726296								DDB1 and CUL4-associated factor 7 OS=Rattus norvegicus OX=10116 GN=Dcaf7 PE=1 SV=1	0.00432161	0.205993
						Phosphatidylinositol-3,5-bisphosphate 3-phosphatase OS=Rattus norvegicus OX=10116 GN=Mtmr2 PE=1 SV=1	-0.168123	0.0783135								Synaptotagmin-11 OS=Rattus norvegicus OX=10116 GN=Syt11 PE=1 SV=2	0.00575927	0.126264
						Protein IMPACT OS=Rattus norvegicus OX=10116 GN=Impact PE=1 SV=1	-0.168123	0.134896								Ig-like domain-containing protein OS=Rattus norvegicus OX=10116 PE=4 SV=1	0.0071955	0.00623397
						Actin, beta-like 2 OS=Rattus norvegicus OX=10116 GN=Actbl2 PE=1 SV=1	-0.168123	0.194499								Gasdermin A OS=Rattus norvegicus OX=10116 GN=Gsdma PE=3 SV=1	0.0086303	0.00342487
						ARF GTPase-activating protein GIT1 OS=Rattus norvegicus OX=10116 GN=Git1 PE=1 SV=1	-0.168123	0.194499								RAB1B, member RAS oncogene family OS=Rattus norvegicus OX=10116 GN=LOC100363782 PE=1 SV=1	0.0100637	0.0221421
						Spectrin beta chain OS=Rattus norvegicus OX=10116 GN=Sptb PE=1 SV=1	-0.168123	0.216096								Adenosylhomocysteinase OS=Rattus norvegicus OX=10116 GN=Ahcy PE=1 SV=3	0.0114956	0.112062
						F-box only protein 2 OS=Rattus norvegicus OX=10116 GN=Fbxo2 PE=4 SV=1	-0.168123	0.229885								Ac2-067 OS=Rattus norvegicus OX=10116 PE=2 SV=1	0.0129262	0.0355565
						Sodium/potassium-transporting ATPase subunit alpha-2 OS=Rattus norvegicus OX=10116 GN=Atp1a2 PE=1 SV=1	-0.168123	0.232844								40S ribosomal protein S25 OS=Rattus norvegicus OX=10116 PE=3 SV=1	0.0143553	0.126264
						RCG61099, isoform CRA_b OS=Rattus norvegicus OX=10116 GN=Srsf3 PE=1 SV=1	-0.168123	0.279014								Catenin beta-1 OS=Rattus norvegicus OX=10116 GN=Ctnnb1 PE=1 SV=1	0.015783	0.0412905
						Formate--tetrahydrofolate ligase OS=Rattus norvegicus OX=10116 GN=Mthfd1l PE=1 SV=1	-0.168123	0.374688								Transformer-2 protein homolog beta OS=Rattus norvegicus OX=10116 GN=Tra2b PE=1 SV=1	0.0200577	0.160627
						Ankyrin-3 OS=Rattus norvegicus OX=10116 GN=Ank3 PE=1 SV=3	-0.168123	0.444906								Ataxin-10 OS=Rattus norvegicus OX=10116 GN=Atxn10 PE=1 SV=1	0.0200577	0.128916
						Ubiquitin carboxyl-terminal hydrolase OS=Rattus norvegicus OX=10116 GN=Usp14 PE=1 SV=1	-0.168123	0.47237								DNA damage-binding protein 1 OS=Rattus norvegicus OX=10116 GN=Ddb1 PE=1 SV=1	0.0200577	0.0579463
						Creatine kinase B-type OS=Rattus norvegicus OX=10116 GN=Ckb PE=1 SV=2	-0.168123	0.906578								Tyrosine-protein kinase Fyn OS=Rattus norvegicus OX=10116 GN=Fyn PE=1 SV=1	0.0200577	0.0314632
						CLIP-associating protein 2 OS=Rattus norvegicus OX=10116 GN=Clasp2 PE=1 SV=1	-0.152003	0.0127808								Guanine nucleotide-binding protein G(I)/G(S)/G(T) subunit beta-1 OS=Rattus norvegicus OX=10116 GN=Gnb1 PE=1 SV=4	0.0214797	0.120143
						Elongation factor 1-alpha OS=Rattus norvegicus OX=10116 GN=LOC100360413 PE=3 SV=1	-0.152003	0.0452752								Ig-like domain-containing protein OS=Rattus norvegicus OX=10116 PE=1 SV=1	0.0214797	0.0805335
						Leucyl-tRNA synthetase OS=Rattus norvegicus OX=10116 GN=Lars PE=1 SV=1	-0.152003	0.0788339								Twinfilin-1 OS=Rattus norvegicus OX=10116 GN=Twf1 PE=1 SV=1	0.0214797	0.0279197
						Similar to keratinocytes proline-rich protein OS=Rattus norvegicus OX=10116 GN=LOC686143 PE=4 SV=3	-0.152003	0.0809219								Ig-like domain-containing protein OS=Rattus norvegicus OX=10116 PE=1 SV=1	0.0229004	0.0635596
						Dolichol-phosphate mannosyltransferase subunit 1 OS=Rattus norvegicus OX=10116 GN=Dpm1 PE=1 SV=1	-0.152003	0.10513								Actin-related protein 2 OS=Rattus norvegicus OX=10116 GN=Actr2 PE=2 SV=1	0.0243197	0.0593
						Clusterin OS=Rattus norvegicus OX=10116 GN=Clu PE=1 SV=1	-0.152003	0.112383								Alpha-centractin OS=Rattus norvegicus OX=10116 GN=Actr1a PE=1 SV=1	0.0257376	0.215414
						HECT-type E3 ubiquitin transferase OS=Rattus norvegicus OX=10116 GN=Nedd4l PE=1 SV=3	-0.152003	0.172631								Cullin-associated NEDD8-dissociated protein 1 OS=Rattus norvegicus OX=10116 GN=Cand1 PE=1 SV=1	0.0257376	0.0230359
						4F2 cell-surface antigen heavy chain OS=Rattus norvegicus OX=10116 GN=Slc3a2 PE=1 SV=1	-0.152003	0.215383								Microtubule-associated protein RP/EB family member 2 OS=Rattus norvegicus OX=10116 PE=3 SV=2	0.0271541	0.0412905
						Intercellular adhesion molecule 5 OS=Rattus norvegicus OX=10116 GN=Icam5 PE=1 SV=1	-0.152003	0.244888								Protein ERGIC-53 OS=Rattus norvegicus OX=10116 GN=Lman1 PE=1 SV=1	0.0285692	0.106876
						Exostoses (Multiple)-like 3, isoform CRA_a OS=Rattus norvegicus OX=10116 GN=Extl3 PE=2 SV=1	-0.152003	0.313364								Ras-related protein Rab-1A OS=Rattus norvegicus OX=10116 GN=Rab1A PE=1 SV=3	0.0299829	0.00645115
						Heat shock protein HSP 90-beta OS=Rattus norvegicus OX=10116 GN=Hsp90ab1 PE=1 SV=4	-0.152003	0.317855								Mitochondrial import inner membrane translocase subunit TIM50 OS=Rattus norvegicus OX=10116 GN=Timm50 PE=1 SV=2	0.0313952	0.19903
						Glutathione S-transferase LANCL1 OS=Rattus norvegicus OX=10116 GN=Lancl1 PE=1 SV=2	-0.152003	0.317855								Metal cation symporter ZIP8 OS=Rattus norvegicus OX=10116 GN=Slc39a8 PE=1 SV=1	0.0342157	0.0152995
						Purine-rich element-binding protein G OS=Rattus norvegicus OX=10116 GN=Purg PE=1 SV=1	-0.152003	0.357535								S-phase kinase-associated protein 1 OS=Rattus norvegicus OX=10116 GN=Skp1 PE=1 SV=1	0.0370307	0.407393
						Calmodulin-regulated spectrin-associated protein family, member 3 OS=Rattus norvegicus OX=10116 GN=Camsap3 PE=1 SV=2	-0.152003	0.375718								60S ribosomal protein L10a OS=Rattus norvegicus OX=10116 GN=Rpl10a PE=1 SV=2	0.0384362	0.0299645
						Cell division control protein 42 homolog OS=Rattus norvegicus OX=10116 GN=Cdc42 PE=1 SV=1	-0.152003	0.420216								SRC kinase signaling inhibitor 1 OS=Rattus norvegicus OX=10116 GN=Srcin1 PE=1 SV=1	0.041243	0.230341
						40S ribosomal protein S9 OS=Rattus norvegicus OX=10116 GN=Rps9 PE=1 SV=4	-0.152003	0.455932								Succinyl-CoA:3-ketoacid coenzyme A transferase 1, mitochondrial OS=Rattus norvegicus OX=10116 GN=Oxct1 PE=1 SV=1	0.0426443	0.0266773
						Myosin heavy chain 14 OS=Rattus norvegicus OX=10116 GN=Myh14 PE=1 SV=1	-0.152003	0.493495								Cofilin-1 OS=Rattus norvegicus OX=10116 GN=Cfl1 PE=1 SV=3	0.0426443	0.00623397
						60S ribosomal protein L7 OS=Rattus norvegicus OX=10116 GN=Rpl7 PE=1 SV=1	-0.152003	0.638272								Ig-like domain-containing protein OS=Rattus norvegicus OX=10116 PE=4 SV=3	0.0440443	0.112062
						Actin, cytoplasmic 2 OS=Rattus norvegicus OX=10116 GN=Actg1 PE=1 SV=1	-0.152003	0.838632								60S ribosomal protein L35a OS=Rattus norvegicus OX=10116 GN=Rpl35a PE=3 SV=1	0.0440443	0.109426
						ATPase family AAA domain-containing protein 3 OS=Rattus norvegicus OX=10116 GN=Atad3 PE=1 SV=1	-0.152003	0.910095								40S ribosomal protein S16 OS=Rattus norvegicus OX=10116 GN=Rps16 PE=1 SV=2	0.045443	0.128916
						Solute carrier family 25 member 12 OS=Rattus norvegicus OX=10116 GN=Slc25a12 PE=1 SV=3	-0.136062	0.00833099								CAP-Gly domain-containing linker protein 2 OS=Rattus norvegicus OX=10116 GN=Clip2 PE=1 SV=1	0.045443	0.10133
						Tropomodulin-1 OS=Rattus norvegicus OX=10116 GN=Tmod1 PE=1 SV=1	-0.136062	0.00966115								Immunoglobulin heavy constant mu OS=Rattus norvegicus OX=10116 GN=Ighm PE=1 SV=3	0.045443	0.0333252
						Reticulocalbin-2 OS=Rattus norvegicus OX=10116 GN=Rcn2 PE=1 SV=2	-0.136062	0.0231917								RCG31239, isoform CRA_a OS=Rattus norvegicus OX=10116 GN=Zbtb48 PE=4 SV=1	0.0496308	0.215414
						Solute carrier family 27 (Fatty acid transporter), member 4 OS=Rattus norvegicus OX=10116 GN=Slc27a4 PE=1 SV=1	-0.136062	0.0231917								Ig gamma-2B chain C region OS=Rattus norvegicus OX=10116 GN=Igh-1a PE=1 SV=1	0.0496308	0.168314
						Serine/threonine-protein kinase PAK 2 OS=Rattus norvegicus OX=10116 GN=Pak2 PE=1 SV=1	-0.136062	0.02365								Dmx-like 2 OS=Rattus norvegicus OX=10116 GN=Dmxl2 PE=1 SV=3	0.051024	0.114072
						ATPase Get3 OS=Rattus norvegicus OX=10116 GN=Get3 PE=1 SV=1	-0.136062	0.0347983								Hephaestin OS=Rattus norvegicus OX=10116 GN=Heph PE=1 SV=1	0.051024	0.0100618
						La ribonucleoprotein 1, translational regulator OS=Rattus norvegicus OX=10116 GN=Larp1 PE=1 SV=3	-0.136062	0.0510982								Retinaldehyde binding protein 1 (Predicted), isoform CRA_a OS=Rattus norvegicus OX=10116 GN=Rlbp1 PE=4 SV=1	0.051024	0.00623397
						Microtubule-associated protein RP/EB family member 1 OS=Rattus norvegicus OX=10116 GN=Mapre1 PE=1 SV=3	-0.136062	0.0670192								Pericentrin OS=Rattus norvegicus OX=10116 GN=Pcnt PE=1 SV=3	0.0524159	0.112062
						Nascent polypeptide-associated complex subunit alpha OS=Rattus norvegicus OX=10116 GN=Naca PE=1 SV=1	-0.136062	0.09691								Ig-like domain-containing protein OS=Rattus norvegicus OX=10116 PE=1 SV=1	0.0538064	0.296231
						Endoplasmic reticulum-golgi intermediate compartment 1 OS=Rattus norvegicus OX=10116 GN=Ergic1 PE=1 SV=2	-0.136062	0.138466								14-3-3 protein gamma OS=Rattus norvegicus OX=10116 GN=Ywhag PE=1 SV=2	0.0538064	0.106723
						Target of myb1 homolog (Chicken) OS=Rattus norvegicus OX=10116 GN=Tom1 PE=1 SV=1	-0.136062	0.163043								ATPase family AAA domain-containing protein 3 OS=Rattus norvegicus OX=10116 GN=Atad3 PE=1 SV=1	0.0551957	0.169233
						Ras association domain-containing protein 5 OS=Rattus norvegicus OX=10116 GN=Rassf5 PE=4 SV=1	-0.136062	0.195861								Complement C3 OS=Rattus norvegicus OX=10116 GN=C3 PE=1 SV=1	0.0551957	0.0593192
						Heterogeneous nuclear ribonucleoprotein D0 OS=Rattus norvegicus OX=10116 GN=Hnrnpd PE=1 SV=2	-0.136062	0.284833								60S acidic ribosomal protein P1 OS=Rattus norvegicus OX=10116 GN=Rplp1 PE=3 SV=1	0.0551957	0.0314632
						Platelet-activating factor acetylhydrolase IB subunit alpha2 OS=Rattus norvegicus OX=10116 GN=Pafah1b2 PE=1 SV=1	-0.136062	0.335358								Vitronectin OS=Rattus norvegicus OX=10116 GN=Vtn PE=1 SV=1	0.0565835	0.410121
						Ras-related protein Rab-3A OS=Rattus norvegicus OX=10116 GN=Rab3a PE=1 SV=1	-0.136062	0.360514								Synaptic vesicle glycoprotein 2A OS=Rattus norvegicus OX=10116 GN=Sv2a PE=1 SV=2	0.0565835	0.234054
						D-beta-hydroxybutyrate dehydrogenase, mitochondrial OS=Rattus norvegicus OX=10116 GN=Bdh1 PE=1 SV=2	-0.136062	0.369572								Ig kappa chain V-IV region-like OS=Rattus norvegicus OX=10116 GN=LOC690813 PE=1 SV=2	0.0593553	0.00241605
						26S proteasome non-ATPase regulatory subunit 13 OS=Rattus norvegicus OX=10116 GN=Psmd13 PE=1 SV=1	-0.136062	0.437707								Alpha-1-macroglobulin OS=Rattus norvegicus OX=10116 GN=A1m PE=1 SV=1	0.0607392	0.148583
						F-actin-capping protein subunit alpha-1 OS=Rattus norvegicus OX=10116 GN=Capza1 PE=1 SV=1	-0.136062	0.498941								BRI3-binding protein OS=Rattus norvegicus OX=10116 GN=Bri3bp PE=1 SV=1	0.0621217	0.0152995
						ATP synthase subunit alpha, mitochondrial OS=Rattus norvegicus OX=10116 GN=Atp5f1a PE=1 SV=2	-0.136062	1.284								I-kappa-B kinase OS=Rattus norvegicus OX=10116 GN=Ikbkb PE=1 SV=1	0.0662614	0.00471915
						3-hydroxyacyl-CoA dehydrogenase type-2 OS=Rattus norvegicus OX=10116 GN=Hsd17b10 PE=1 SV=3	-0.120294	0.00744648								AP-3 complex subunit delta OS=Rattus norvegicus OX=10116 GN=Ap3d1 PE=1 SV=1	0.0676387	0.0747204
						Inactive hydroxysteroid dehydrogenase-like protein 1 OS=Rattus norvegicus OX=10116 GN=Hsdl1 PE=2 SV=1	-0.120294	0.00921731								Serine/threonine-protein kinase MARK2 OS=Rattus norvegicus OX=10116 GN=Mark2 PE=1 SV=1	0.0690147	0.230804
						LUC7-like 2 (S. cerevisiae) OS=Rattus norvegicus OX=10116 GN=Luc7l2 PE=1 SV=1	-0.120294	0.0168249								Clusterin OS=Rattus norvegicus OX=10116 GN=Clu PE=1 SV=1	0.0703893	0.0940628
						SR-related and CTD-associated factor 8 OS=Rattus norvegicus OX=10116 GN=Scaf8 PE=1 SV=1	-0.120294	0.0467237								26S proteasome regulatory subunit 6A OS=Rattus norvegicus OX=10116 GN=Psmc3 PE=1 SV=1	0.0717627	0.0159287
						Neurocalcin-delta OS=Rattus norvegicus OX=10116 GN=Ncald PE=1 SV=3	-0.120294	0.09691								Dedicator of cyto-kinesis 3 OS=Rattus norvegicus OX=10116 GN=Dock3 PE=1 SV=3	0.0717627	0.0120884
						Kinesin light chain 1 OS=Rattus norvegicus OX=10116 GN=Klc1 PE=1 SV=2	-0.120294	0.129596								Heat shock 70 kDa protein 4 OS=Rattus norvegicus OX=10116 GN=Hspa4 PE=1 SV=1	0.0731347	0.138475
						Ketimine reductase mu-crystallin OS=Rattus norvegicus OX=10116 GN=Crym PE=1 SV=1	-0.120294	0.130182								Mitochondrial glutamate carrier 1-like OS=Rattus norvegicus OX=10116 GN=LOC100911440 PE=1 SV=1	0.0758749	0.0232258
						Adenomatous polyposis coli protein OS=Rattus norvegicus OX=10116 GN=Apc PE=1 SV=1	-0.120294	0.170696								Erlin-2 OS=Rattus norvegicus OX=10116 GN=Erlin2 PE=1 SV=1	0.077243	0.0476874
						Calcium-dependent secretion activator 1 OS=Rattus norvegicus OX=10116 GN=Cadps PE=1 SV=3	-0.120294	0.236572								Prolow-density lipoprotein receptor-related protein 1 OS=Rattus norvegicus OX=10116 GN=Lrp1 PE=1 SV=1	0.077243	0.0418242
						RNA binding motif protein 39 OS=Rattus norvegicus OX=10116 GN=Rbm39 PE=1 SV=1	-0.120294	0.28567								Coronin OS=Rattus norvegicus OX=10116 GN=Coro1c PE=1 SV=1	0.0786098	0.624856
						WD repeat-containing protein 1 OS=Rattus norvegicus OX=10116 GN=Wdr1 PE=1 SV=3	-0.120294	0.289883								Septin OS=Rattus norvegicus OX=10116 GN=Sept5 PE=1 SV=1	0.0786098	0.133597
						Actin-related protein 2/3 complex subunit 5 OS=Rattus norvegicus OX=10116 GN=Arpc5 PE=1 SV=3	-0.120294	0.372634								LanC lantibiotic synthetase component C-like 2 (Bacterial) OS=Rattus norvegicus OX=10116 GN=Lancl2 PE=1 SV=1	0.0786098	0.0553824
						Microtubule-associated protein OS=Rattus norvegicus OX=10116 GN=Map2 PE=1 SV=1	-0.120294	0.431798								RCG38820 OS=Rattus norvegicus OX=10116 GN=Upf1 PE=1 SV=3	0.0799754	0.23914
						Actin, alpha cardiac muscle 1 OS=Rattus norvegicus OX=10116 GN=Actc1 PE=2 SV=1	-0.120294	0.493495								Keratin 16 OS=Rattus norvegicus OX=10116 GN=Krt16 PE=1 SV=1	0.0799754	0.148583
						Heterogeneous nuclear ribonucleoprotein M OS=Rattus norvegicus OX=10116 GN=Hnrnpm PE=1 SV=1	-0.120294	0.642065								Immunoglobulin heavy constant mu OS=Rattus norvegicus OX=10116 GN=Ighm PE=4 SV=1	0.0799754	0.0265704
						Coronin OS=Rattus norvegicus OX=10116 GN=Coro2b PE=3 SV=3	-0.120294	0.826814								RNA-splicing ligase RtcB homolog OS=Rattus norvegicus OX=10116 GN=Rtcb PE=2 SV=1	0.0799754	0.0101269
						Triple functional domain protein OS=Rattus norvegicus OX=10116 GN=Trio PE=1 SV=4	-0.120294	1.29414								Albumin OS=Rattus norvegicus OX=10116 GN=Alb PE=1 SV=1	0.0813396	0.518789
						SET-binding factor 1 OS=Rattus norvegicus OX=10116 GN=Sbf1 PE=1 SV=1	-0.104697	0.00966115								Keratin, type I cytoskeletal 17 OS=Rattus norvegicus OX=10116 GN=Krt17 PE=1 SV=1	0.0854247	0.131629
						Rho GTPase-activating protein 39 OS=Rattus norvegicus OX=10116 GN=Arhgap39 PE=1 SV=1	-0.104697	0.0127808								DEAD box protein 5 OS=Rattus norvegicus OX=10116 GN=Ddx5 PE=1 SV=1	0.0867838	0.160627
						Serine/threonine-protein kinase MARK2 OS=Rattus norvegicus OX=10116 GN=Mark2 PE=1 SV=1	-0.104697	0.0213631								Coagulation factor V OS=Rattus norvegicus OX=10116 GN=F5 PE=1 SV=1	0.0881416	0.230341
						Exocyst complex component Sec8 OS=Rattus norvegicus OX=10116 GN=Exoc4 PE=1 SV=2	-0.104697	0.034328								Gelsolin OS=Rattus norvegicus OX=10116 GN=Gsn PE=1 SV=1	0.0881416	0.205993
						Microtubule-associated protein 6 OS=Rattus norvegicus OX=10116 GN=Map6 PE=1 SV=1	-0.104697	0.0409586								Acrosin-binding protein OS=Rattus norvegicus OX=10116 GN=Acrbp PE=2 SV=2	0.0881416	0.048489
						NEDD4 family-interacting protein 1 OS=Rattus norvegicus OX=10116 GN=Ndfip1 PE=2 SV=1	-0.104697	0.0409586								Neurochondrin OS=Rattus norvegicus OX=10116 GN=Ncdn PE=1 SV=2	0.0881416	0.0152995
						C2CD2-like OS=Rattus norvegicus OX=10116 GN=C2cd2l PE=1 SV=1	-0.104697	0.0619809								Zinc finger protein 419-like OS=Rattus norvegicus OX=10116 GN=LOC102547412 PE=4 SV=1	0.0908534	0.271679
						Immunoglobulin heavy constant mu OS=Rattus norvegicus OX=10116 GN=Ighm PE=1 SV=3	-0.104697	0.0619809								Dynamin-like 120 kDa protein, mitochondrial OS=Rattus norvegicus OX=10116 GN=Opa1 PE=1 SV=1	0.0908534	0.0769637
						Gamma-aminobutyric acid receptor subunit beta-3 OS=Rattus norvegicus OX=10116 GN=Gabrb3 PE=1 SV=1	-0.104697	0.0670192								Ig-like domain-containing protein OS=Rattus norvegicus OX=10116 PE=1 SV=1	0.0908534	0.0265704
						RCG28460 OS=Rattus norvegicus OX=10116 GN=Wdr47 PE=1 SV=1	-0.104697	0.0721166								Sarcoplasmic/endoplasmic reticulum calcium ATPase 3 OS=Rattus norvegicus OX=10116 GN=Atp2a3 PE=1 SV=3	0.0949116	0.0595607
						Heterogeneous nuclear ribonucleoprotein A1 OS=Rattus norvegicus OX=10116 GN=Hnrnpa1 PE=1 SV=3	-0.104697	0.090444								Adenine phosphoribosyltransferase OS=Rattus norvegicus OX=10116 GN=Aprt PE=1 SV=1	0.0949116	0.0476874
						Dystrophin OS=Rattus norvegicus OX=10116 GN=Dmd PE=1 SV=2	-0.104697	0.0974532								Neuron navigator 1 OS=Rattus norvegicus OX=10116 GN=Nav1 PE=1 SV=3	0.0989585	0.0263152
						26S proteasome non-ATPase regulatory subunit 2 OS=Rattus norvegicus OX=10116 GN=Psmd2 PE=1 SV=1	-0.104697	0.10902								Serotransferrin OS=Rattus norvegicus OX=10116 GN=Tf PE=1 SV=3	0.100305	0.11874
						Speckle targeted PIP5K1A-regulated poly(A) polymerase OS=Rattus norvegicus OX=10116 GN=Tut1 PE=1 SV=1	-0.104697	0.123782								RNA helicase OS=Rattus norvegicus OX=10116 GN=Dhx15 PE=1 SV=1	0.10165	0.209295
						ATP synthase subunit O, mitochondrial OS=Rattus norvegicus OX=10116 GN=Atp5po PE=1 SV=1	-0.104697	0.127261								Tubulin beta chain OS=Rattus norvegicus OX=10116 GN=Tubb1 PE=1 SV=1	0.10165	0.0241893
						Synaptotagmin-5 OS=Rattus norvegicus OX=10116 GN=Syt5 PE=1 SV=1	-0.104697	0.151811								Tubulin beta chain OS=Rattus norvegicus OX=10116 GN=Tubb4b PE=1 SV=2	0.102994	0.136134
						GTP-binding nuclear protein Ran OS=Rattus norvegicus OX=10116 GN=RGD1306195 PE=2 SV=1	-0.104697	0.172631								Vacuolar protein sorting-associated protein 4A OS=Rattus norvegicus OX=10116 GN=Vps4a PE=1 SV=1	0.105678	0.0818292
						CB1 cannabinoid receptor-interacting protein 1 OS=Rattus norvegicus OX=10116 GN=Cnrip1 PE=1 SV=1	-0.104697	0.172631								CCT-theta OS=Rattus norvegicus OX=10116 GN=Cct8 PE=1 SV=1	0.107018	0.137687
						14-3-3 protein theta OS=Rattus norvegicus OX=10116 GN=Ywhaq PE=1 SV=1	-0.104697	0.20412								Solute carrier organic anion transporter family member OS=Rattus norvegicus OX=10116 GN=Slco1c1 PE=3 SV=1	0.108357	0.0637466
						RCG21069 OS=Rattus norvegicus OX=10116 GN=rCG_21069 PE=1 SV=2	-0.104697	0.215383								Ig-like domain-containing protein OS=Rattus norvegicus OX=10116 PE=4 SV=2	0.108357	0.00684532
						Transcriptional activator protein Pur-beta OS=Rattus norvegicus OX=10116 GN=Purb PE=1 SV=3	-0.104697	0.222573								DnaJ (Hsp40) homolog, subfamily C, member 6 (Predicted) OS=Rattus norvegicus OX=10116 GN=Dnajc6 PE=1 SV=1	0.109695	0.00623397
						Transforming protein RhoA OS=Rattus norvegicus OX=10116 GN=Rhoa PE=1 SV=1	-0.104697	0.272459								Rab GDP dissociation inhibitor alpha OS=Rattus norvegicus OX=10116 GN=Gdi1 PE=1 SV=1	0.112367	0.072472
						60S ribosomal protein L11 OS=Rattus norvegicus OX=10116 GN=Rpl11 PE=1 SV=2	-0.104697	0.30103								Fibronectin OS=Rattus norvegicus OX=10116 GN=Fn1 PE=1 SV=3	0.1137	0.168791
						NDUFA4, mitochondrial complex-associated OS=Rattus norvegicus OX=10116 GN=Ndufa4 PE=1 SV=1	-0.104697	0.326058								Ig-like domain-containing protein OS=Rattus norvegicus OX=10116 PE=1 SV=3	0.115033	0.280094
						S-phase cyclin A-associated protein in the ER OS=Rattus norvegicus OX=10116 GN=Scaper PE=4 SV=3	-0.104697	0.329754								Protein C, isoform CRA_b OS=Rattus norvegicus OX=10116 GN=Proc PE=1 SV=1	0.116365	0.119441
						Serine/threonine-protein kinase BRSK1 OS=Rattus norvegicus OX=10116 GN=Brsk1 PE=1 SV=1	-0.104697	0.403403								EH domain-containing protein 1 OS=Rattus norvegicus OX=10116 GN=Ehd1 PE=1 SV=1	0.119024	0.0412905
						F-actin-capping protein subunit beta OS=Rattus norvegicus OX=10116 GN=Capzb PE=1 SV=1	-0.104697	0.598599								Peroxiredoxin-1 OS=Rattus norvegicus OX=10116 PE=3 SV=1	0.119024	0.0299645
						TAR DNA-binding protein 43 OS=Rattus norvegicus OX=10116 GN=Tardbp PE=1 SV=1	-0.0892673	0.00833099								Syntaxin-binding protein 1 OS=Rattus norvegicus OX=10116 GN=Stxbp1 PE=1 SV=1	0.120352	0.25496
						Signal recognition particle subunit SRP72 OS=Rattus norvegicus OX=10116 GN=LOC108348180 PE=1 SV=1	-0.0892673	0.0282604								Plasma membrane calcium-transporting ATPase 2 OS=Rattus norvegicus OX=10116 GN=Atp2b2 PE=1 SV=2	0.120352	0.207543
						Programmed cell death 6-interacting protein OS=Rattus norvegicus OX=10116 GN=Pdcd6ip PE=1 SV=1	-0.0892673	0.0385789								Tubulin alpha-4A chain OS=Rattus norvegicus OX=10116 GN=Tuba4a PE=1 SV=1	0.121679	0.587036
						Protein transport protein SEC23 OS=Rattus norvegicus OX=10116 GN=Sec23a PE=1 SV=1	-0.0892673	0.0952845								Ras-related C3 botulinum toxin substrate 1 OS=Rattus norvegicus OX=10116 GN=Rac1 PE=1 SV=1	0.121679	0.292235
						Staufen double-stranded RNA-binding protein 1 OS=Rattus norvegicus OX=10116 GN=Stau1 PE=1 SV=1	-0.0892673	0.0974532								Glycerol-3-phosphate dehydrogenase [NAD(+)] OS=Rattus norvegicus OX=10116 GN=Gpd1l PE=1 SV=1	0.121679	0.229893
						Zinc finger protein 605 OS=Rattus norvegicus OX=10116 GN=Zfp605 PE=4 SV=3	-0.0892673	0.114639								Coatomer subunit beta' OS=Rattus norvegicus OX=10116 GN=Copb2 PE=1 SV=3	0.123004	0.351938
						Septin-11 OS=Rattus norvegicus OX=10116 GN=Septin11 PE=1 SV=1	-0.0892673	0.121478								Carboxypeptidase N catalytic chain OS=Rattus norvegicus OX=10116 GN=Cpn1 PE=2 SV=1	0.126973	0.139477
						Proteasome (Prosome, macropain) 26S subunit, non-ATPase, 3 OS=Rattus norvegicus OX=10116 GN=Psmd3 PE=1 SV=1	-0.0892673	0.203426								Spectrin beta chain OS=Rattus norvegicus OX=10116 GN=Sptbn2 PE=1 SV=2	0.126973	0.0539223
						Peroxiredoxin-like 2A OS=Rattus norvegicus OX=10116 GN=Prxl2a PE=1 SV=1	-0.0892673	0.267606								Elongator complex protein 1 OS=Rattus norvegicus OX=10116 GN=Elp1 PE=1 SV=2	0.128293	0.0355565
						Glutathione S-transferase P OS=Rattus norvegicus OX=10116 GN=Gstp1 PE=1 SV=2	-0.0892673	0.342944								Fibrillin 2 OS=Rattus norvegicus OX=10116 GN=Fbn2 PE=3 SV=3	0.129613	0.0689176
						Protein TANC2 OS=Rattus norvegicus OX=10116 GN=Tanc2 PE=1 SV=1	-0.0892673	0.383								Dihydropyrimidinase-related protein 5 OS=Rattus norvegicus OX=10116 GN=Dpysl5 PE=1 SV=1	0.130931	0.0318261
						ADP/ATP translocase OS=Rattus norvegicus OX=10116 GN=Slc25a4 PE=1 SV=1	-0.0892673	0.395774								60S ribosomal protein L31 OS=Rattus norvegicus OX=10116 GN=Rpl31 PE=2 SV=1	0.130931	0.0232258
						Spectrin alpha chain, non-erythrocytic 1 OS=Rattus norvegicus OX=10116 GN=Sptan1 PE=1 SV=1	-0.0892673	0.571865								C1q and TNF-related 4 OS=Rattus norvegicus OX=10116 GN=C1qtnf4 PE=4 SV=1	0.133564	0.237323
						Spectrin beta chain OS=Rattus norvegicus OX=10116 GN=Sptbn1 PE=1 SV=3	-0.0892673	0.995679								Desmocollin 1 OS=Rattus norvegicus OX=10116 GN=Dsc1 PE=4 SV=1	0.136191	0.244608
						Killer cell lectin-like receptor subfamily B member 1A OS=Rattus norvegicus OX=10116 GN=Klrb1a PE=1 SV=1	-0.0740006	0.0181814								Coatomer subunit beta OS=Rattus norvegicus OX=10116 GN=Copb1 PE=1 SV=1	0.136191	0.0940628
						Ras-related protein Rab-11B OS=Rattus norvegicus OX=10116 GN=Rab11b PE=1 SV=1	-0.0740006	0.0186345								Antithrombin-III OS=Rattus norvegicus OX=10116 GN=Serpinc1 PE=1 SV=1	0.138814	0.38108
						Copine 4 OS=Rattus norvegicus OX=10116 GN=Cpne4 PE=3 SV=2	-0.0740006	0.02365								Complement C1q subcomponent subunit A OS=Rattus norvegicus OX=10116 GN=C1qa PE=1 SV=2	0.140124	0.270466
						Cell cycle and apoptosis regulator 2 OS=Rattus norvegicus OX=10116 GN=Ccar2 PE=1 SV=1	-0.0740006	0.0277972								40S ribosomal protein S7 OS=Rattus norvegicus OX=10116 GN=Rps7 PE=1 SV=1	0.141433	0.292867
						Ras-related protein Rab-12 OS=Rattus norvegicus OX=10116 GN=Rab12 PE=1 SV=2	-0.0740006	0.0329203								Granzyme N OS=Rattus norvegicus OX=10116 GN=Gzmn PE=4 SV=2	0.141433	0.213572
						Cornifin-A OS=Rattus norvegicus OX=10116 GN=Sprr1a PE=2 SV=1	-0.0740006	0.0414361								Protein RUFY3 OS=Rattus norvegicus OX=10116 GN=Rufy3 PE=1 SV=1	0.14274	0.234176
						Histone H2A OS=Rattus norvegicus OX=10116 GN=H2afx PE=1 SV=1	-0.0740006	0.076756								14-3-3 protein eta OS=Rattus norvegicus OX=10116 GN=Ywhah PE=1 SV=2	0.144046	0.339194
						Methylcrotonoyl-CoA carboxylase beta chain, mitochondrial OS=Rattus norvegicus OX=10116 GN=Mccc2 PE=2 SV=1	-0.0740006	0.104025								60S ribosomal protein L32 OS=Rattus norvegicus OX=10116 GN=Rpl32 PE=1 SV=2	0.144046	0.278322
						4-trimethylaminobutyraldehyde dehydrogenase OS=Rattus norvegicus OX=10116 GN=Aldh9a1 PE=1 SV=1	-0.0740006	0.133713								60S ribosomal protein L9 OS=Rattus norvegicus OX=10116 GN=LOC103692829 PE=3 SV=1	0.145351	0.111081
						NADH dehydrogenase [ubiquinone] 1 alpha subcomplex subunit 9, mitochondrial OS=Rattus norvegicus OX=10116 GN=Ndufa9 PE=1 SV=2	-0.0740006	0.14813								ADAM metallopeptidase domain 11 OS=Rattus norvegicus OX=10116 GN=Adam11 PE=4 SV=1	0.146655	0.00761881
						Receptor-type tyrosine-protein phosphatase S OS=Rattus norvegicus OX=10116 GN=Ptprs PE=1 SV=2	-0.0740006	0.165579								ATP synthase subunit beta, mitochondrial OS=Rattus norvegicus OX=10116 GN=Atp5f1b PE=1 SV=2	0.147958	0.104174
						Friend virus susceptibility 1 OS=Rattus norvegicus OX=10116 GN=Fv1 PE=4 SV=1	-0.0740006	0.195179								Serine/threonine-protein kinase MRCK beta OS=Rattus norvegicus OX=10116 GN=Cdc42bpb PE=1 SV=1	0.15056	0.518789
						V-type proton ATPase 116 kDa subunit a 1 OS=Rattus norvegicus OX=10116 GN=Atp6v0a1 PE=1 SV=1	-0.0740006	0.243364								Spectrin alpha chain, non-erythrocytic 1 OS=Rattus norvegicus OX=10116 GN=Sptan1 PE=1 SV=1	0.15056	0.334303
						Protein phosphatase 2 (Formerly 2A), regulatory subunit A (PR 65), alpha isoform, isoform CRA_a OS=Rattus norvegicus OX=10116 GN=Ppp2r1a PE=1 SV=1	-0.0740006	0.329754								Gamma-aminobutyric acid receptor subunit gamma-2 OS=Rattus norvegicus OX=10116 GN=Gabrg2 PE=1 SV=1	0.15056	0.171789
						LIM domain 7 OS=Rattus norvegicus OX=10116 GN=Lmo7 PE=1 SV=1	-0.0740006	0.436519								POU domain, class 3, transcription factor 1 OS=Rattus norvegicus OX=10116 GN=Pou3f1 PE=2 SV=2	0.151859	0.222868
						Transportin 2 OS=Rattus norvegicus OX=10116 GN=Tnpo2 PE=1 SV=2	-0.0588937	0.00130484								Nidogen-2 OS=Rattus norvegicus OX=10116 GN=Nid2 PE=2 SV=1	0.151859	0.213572
						Cofilin-1 OS=Rattus norvegicus OX=10116 GN=Cfl1 PE=1 SV=3	-0.0588937	0.00656377								Cytochrome c oxidase subunit 2 OS=Rattus norvegicus OX=10116 GN=Mtco2 PE=1 SV=3	0.151859	0.0868325
						Elongator complex protein 3 OS=Rattus norvegicus OX=10116 GN=Elp3 PE=1 SV=2	-0.0588937	0.0168249								Protein SCAI OS=Rattus norvegicus OX=10116 GN=Scai PE=1 SV=2	0.151859	0.00165978
						Cytochrome c-1 OS=Rattus norvegicus OX=10116 GN=Cyc1 PE=1 SV=3	-0.0588937	0.0168249								Similar to Ig variable region, light chain OS=Rattus norvegicus OX=10116 GN=RGD1565617 PE=4 SV=3	0.153157	0.368292
						Protein AMBP OS=Rattus norvegicus OX=10116 GN=Ambp PE=1 SV=1	-0.0588937	0.0181814								Synaptogyrin-1 (Fragment) OS=Rattus norvegicus OX=10116 GN=Syngr1 PE=3 SV=1	0.153157	0.19903
						Vesicle-associated membrane protein-associated protein B OS=Rattus norvegicus OX=10116 GN=Vapb PE=1 SV=3	-0.0588937	0.0264104								Numb-like protein OS=Rattus norvegicus OX=10116 GN=Numbl PE=1 SV=1	0.153157	0.157142
						Guanine deaminase OS=Rattus norvegicus OX=10116 GN=Gda PE=1 SV=1	-0.0588937	0.0338583								RNA helicase OS=Rattus norvegicus OX=10116 GN=Ddx17 PE=1 SV=1	0.153157	0.0537983
						Thioredoxin domain containing 1 OS=Rattus norvegicus OX=10116 GN=Tmx1 PE=1 SV=1	-0.0588937	0.0390538								Ig-like domain-containing protein OS=Rattus norvegicus OX=10116 PE=1 SV=1	0.155749	0.295952
						SLIT-ROBO Rho GTPase-activating protein 2 OS=Rattus norvegicus OX=10116 GN=Srgap2 PE=1 SV=1	-0.0588937	0.0438316								40S ribosomal protein S29 OS=Rattus norvegicus OX=10116 GN=Rps29 PE=1 SV=2	0.157044	0.164867
						Glutamyl-prolyl-tRNA synthetase OS=Rattus norvegicus OX=10116 GN=Eprs PE=1 SV=1	-0.0588937	0.0438316								Clathrin heavy chain 1 OS=Rattus norvegicus OX=10116 GN=Cltc PE=1 SV=3	0.159629	0.0299645
						ADP/ATP translocase 2 OS=Rattus norvegicus OX=10116 GN=Slc25a5 PE=1 SV=3	-0.0588937	0.0604807								ATP-dependent RNA helicase DDX1 OS=Rattus norvegicus OX=10116 GN=Ddx1 PE=1 SV=1	0.16092	0.199942
						Uncharacterized protein (Fragment) OS=Rattus norvegicus OX=10116 PE=1 SV=3	-0.0588937	0.0757207								ADP/ATP translocase 2 OS=Rattus norvegicus OX=10116 GN=Slc25a5 PE=1 SV=3	0.16092	0.0418242
						NADH dehydrogenase [ubiquinone] flavoprotein 1, mitochondrial OS=Rattus norvegicus OX=10116 GN=Ndufv1 PE=1 SV=1	-0.0588937	0.0757207								Fructose-bisphosphate aldolase OS=Rattus norvegicus OX=10116 GN=Aldoc PE=1 SV=1	0.163499	0.463167
						Calmodulin-regulated spectrin-associated protein 2 OS=Rattus norvegicus OX=10116 GN=Camsap2 PE=1 SV=1	-0.0588937	0.141463								Cytoplasmic dynein 1 intermediate chain 1 OS=Rattus norvegicus OX=10116 GN=Dync1i1 PE=1 SV=3	0.166073	0.207759
						Dihydrolipoyllysine-residue succinyltransferase component of 2-oxoglutarate dehydrogenase complex, mitochondrial OS=Rattus norvegicus OX=10116 GN=Dlst PE=1 SV=2	-0.0588937	0.142668								40S ribosomal protein S15a OS=Rattus norvegicus OX=10116 GN=Rps15a PE=1 SV=2	0.166073	0.207218
						Elongation factor 1-delta OS=Rattus norvegicus OX=10116 GN=Eef1d PE=1 SV=2	-0.0588937	0.153045								Breakpoint cluster region protein OS=Rattus norvegicus OX=10116 GN=Bcr PE=1 SV=4	0.167358	0.0888695
						AP-2 complex subunit alpha OS=Rattus norvegicus OX=10116 GN=Ap2a2 PE=1 SV=1	-0.0588937	0.191789								Synaptic functional regulator FMR1 OS=Rattus norvegicus OX=10116 GN=Fmr1 PE=1 SV=1	0.169925	0.760473
						Succinate--CoA ligase [ADP/GDP-forming] subunit alpha, mitochondrial OS=Rattus norvegicus OX=10116 GN=Suclg1 PE=1 SV=1	-0.0588937	0.209012								Casein kinase 1, epsilon OS=Rattus norvegicus OX=10116 GN=Csnk1e PE=1 SV=1	0.169925	0.142304
						Heat shock 70 kDa protein 4 OS=Rattus norvegicus OX=10116 GN=Hspa4 PE=1 SV=1	-0.0588937	0.29243								Core histone macro-H2A.1 OS=Rattus norvegicus OX=10116 GN=Macroh2a1 PE=1 SV=4	0.171207	0.0593
						Actin-related protein 2/3 complex subunit 1A OS=Rattus norvegicus OX=10116 GN=Arpc1a PE=2 SV=1	-0.0588937	0.309804								Creatine kinase OS=Rattus norvegicus OX=10116 GN=Ckmt2 PE=1 SV=1	0.172488	0.41174
						Tubulin beta-5 chain OS=Rattus norvegicus OX=10116 GN=Tubb5 PE=1 SV=1	-0.0588937	0.41005								cAMP-dependent protein kinase catalytic subunit alpha OS=Rattus norvegicus OX=10116 GN=Prkaca PE=1 SV=2	0.172488	0.292698
						Amine oxidase [flavin-containing] A OS=Rattus norvegicus OX=10116 GN=Maoa PE=1 SV=1	-0.0439433	0.00174066								ELKS/Rab6-interacting/CAST family member 1 OS=Rattus norvegicus OX=10116 GN=Erc1 PE=1 SV=1	0.177599	0.492983
						Ig-like domain-containing protein OS=Rattus norvegicus OX=10116 PE=4 SV=2	-0.0439433	0.0231917								Ig-like domain-containing protein OS=Rattus norvegicus OX=10116 PE=1 SV=3	0.181421	0.192832
						Epidermal growth factor receptor pathway substrate 15-like 1 OS=Rattus norvegicus OX=10116 GN=Eps15l1 PE=1 SV=3	-0.0439433	0.0390538								Aconitate hydratase, mitochondrial OS=Rattus norvegicus OX=10116 GN=Aco2 PE=1 SV=2	0.185232	0.0939103
						Fam91a1 protein OS=Rattus norvegicus OX=10116 GN=Fam91a1 PE=1 SV=1	-0.0439433	0.0680339								E3 ubiquitin-protein ligase RNF181 OS=Rattus norvegicus OX=10116 GN=Rnf181 PE=1 SV=1	0.187768	0.321565
						Serine/arginine-rich splicing factor 5 OS=Rattus norvegicus OX=10116 GN=Srsf5 PE=1 SV=1	-0.0439433	0.0721166								Cytoplasmic linker-associated protein 1 OS=Rattus norvegicus OX=10116 GN=Clasp1 PE=1 SV=1	0.189034	0.150161
						Glutathione hydrolase 7 OS=Rattus norvegicus OX=10116 GN=Ggt7 PE=1 SV=2	-0.0439433	0.0721166								Alpha-2 antiplasmin OS=Rattus norvegicus OX=10116 GN=Serpinf1 PE=1 SV=1	0.190299	0.504558
						40S ribosomal protein S17 OS=Rattus norvegicus OX=10116 GN=LOC100362366 PE=3 SV=1	-0.0439433	0.0772745								Cleavage and polyadenylation specificity factor subunit 6 OS=Rattus norvegicus OX=10116 GN=Cpsf6 PE=1 SV=2	0.191563	0.368551
						Coatomer subunit gamma OS=Rattus norvegicus OX=10116 GN=Copg1 PE=1 SV=1	-0.0439433	0.0899095								Tripartite motif protein 3, isoform CRA_a OS=Rattus norvegicus OX=10116 GN=Trim3 PE=1 SV=1	0.194087	0.0720324
						Tubulin beta chain OS=Rattus norvegicus OX=10116 GN=Tubb1 PE=1 SV=1	-0.0439433	0.104577								Inter-alpha-trypsin inhibitor heavy chain 2 OS=Rattus norvegicus OX=10116 GN=Itih2 PE=1 SV=3	0.197865	0.739702
						Peptidyl-prolyl cis-trans isomerase A OS=Rattus norvegicus OX=10116 GN=Ppia PE=1 SV=2	-0.0439433	0.121478								Cytohesin-2 OS=Rattus norvegicus OX=10116 GN=Cyth2 PE=1 SV=1	0.201634	0.463167
						Exocyst complex component 3 OS=Rattus norvegicus OX=10116 GN=Exoc3 PE=1 SV=1	-0.0439433	0.12436								ATP-dependent 6-phosphofructokinase OS=Rattus norvegicus OX=10116 GN=Pfkm PE=1 SV=1	0.202888	0.0951143
						Complement C4A (Fragment) OS=Rattus norvegicus OX=10116 GN=C4a PE=4 SV=4	-0.0439433	0.143271								Cleavage and polyadenylation specificity factor subunit 5 OS=Rattus norvegicus OX=10116 GN=Nudt21 PE=2 SV=1	0.205393	0.153678
						F-actin-capping protein subunit alpha-2 OS=Rattus norvegicus OX=10116 GN=Capza2 PE=1 SV=1	-0.0439433	0.163043								Ig-like domain-containing protein OS=Rattus norvegicus OX=10116 PE=4 SV=2	0.205393	0.0828925
						Proteasome subunit alpha type-6 OS=Rattus norvegicus OX=10116 GN=Psma6 PE=1 SV=1	-0.0439433	0.216096								Dihydrolipoyllysine-residue acetyltransferase component of pyruvate dehydrogenase complex, mitochondrial OS=Rattus norvegicus OX=10116 GN=Dlat PE=1 SV=3	0.207893	0.177553
						Leucine-rich repeat flightless-interacting protein 2 OS=Rattus norvegicus OX=10116 GN=Lrrfip2 PE=1 SV=1	-0.0439433	0.222573								Exocyst complex component 5 OS=Rattus norvegicus OX=10116 GN=Exoc5 PE=1 SV=1	0.207893	0.170802
						Ubiquitinyl hydrolase 1 OS=Rattus norvegicus OX=10116 GN=Usp9x PE=1 SV=1	-0.0439433	0.224026								Importin 9 OS=Rattus norvegicus OX=10116 GN=Ipo9 PE=1 SV=2	0.212881	0.0221421
						Lysophosphatidylserine lipase ABHD12 OS=Rattus norvegicus OX=10116 GN=Abhd12 PE=2 SV=1	-0.0439433	0.284833								60S ribosomal protein L17 OS=Rattus norvegicus OX=10116 GN=Rpl17 PE=2 SV=3	0.215368	0.234054
						ADP-ribosylation factor 5 OS=Rattus norvegicus OX=10116 GN=Arf5 PE=1 SV=2	-0.0439433	0.422508								AP-2 complex subunit beta OS=Rattus norvegicus OX=10116 GN=Ap2b1 PE=1 SV=1	0.21661	0.432492
						IQ motif and SEC7 domain-containing protein 1 OS=Rattus norvegicus OX=10116 GN=Iqsec1 PE=1 SV=1	-0.0291463	0.0123337								Heterogeneous nuclear ribonucleoprotein Q OS=Rattus norvegicus OX=10116 GN=Syncrip PE=2 SV=1	0.21661	0.234054
						Integrin subunit alpha 2b OS=Rattus norvegicus OX=10116 GN=Itga2b PE=1 SV=2	-0.0291463	0.0136762								Voltage-dependent anion-selective channel protein 3 OS=Rattus norvegicus OX=10116 GN=Vdac3 PE=1 SV=1	0.21661	0.148583
						39S ribosomal protein L16, mitochondrial OS=Rattus norvegicus OX=10116 GN=Mrpl16 PE=2 SV=1	-0.0291463	0.015923								60S ribosomal protein L30 OS=Rattus norvegicus OX=10116 GN=Rpl30 PE=3 SV=2	0.219091	0.756129
						Carboxypeptidase B2 OS=Rattus norvegicus OX=10116 GN=Cpb2 PE=2 SV=1	-0.0291463	0.0168249								V-type proton ATPase subunit G OS=Rattus norvegicus OX=10116 GN=Atp6v1g1 PE=1 SV=1	0.222805	0.0940628
						Myosin-binding protein C, cardiac-type OS=Rattus norvegicus OX=10116 GN=Mybpc3 PE=1 SV=2	-0.0291463	0.0222764								Tubulin beta chain OS=Rattus norvegicus OX=10116 GN=Tubb6 PE=1 SV=1	0.226509	0.224019
						Guanine nucleotide-binding protein subunit alpha-13 OS=Rattus norvegicus OX=10116 GN=Gna13 PE=1 SV=1	-0.0291463	0.02365								Splicing factor U2AF subunit OS=Rattus norvegicus OX=10116 GN=U2af2 PE=1 SV=2	0.227741	0.119512
						Phosphatidylinositol-3,4-bisphosphate 4-phosphatase OS=Rattus norvegicus OX=10116 GN=Inpp4a PE=1 SV=3	-0.0291463	0.02365								Protein phosphatase 1E OS=Rattus norvegicus OX=10116 GN=Ppm1e PE=1 SV=1	0.23634	0.0771103
						14-3-3 protein zeta/delta OS=Rattus norvegicus OX=10116 GN=Ywhaz PE=1 SV=1	-0.0291463	0.0604807								Elongation factor Tu, mitochondrial OS=Rattus norvegicus OX=10116 GN=Tufm PE=1 SV=1	0.24123	0.386372
						Syntaxin-binding protein 1 OS=Rattus norvegicus OX=10116 GN=Stxbp1 PE=1 SV=1	-0.0291463	0.090444								Translocon-associated protein subunit delta OS=Rattus norvegicus OX=10116 GN=Ssr4 PE=2 SV=1	0.24123	0.208949
						Catenin beta-1 OS=Rattus norvegicus OX=10116 GN=Ctnnb1 PE=1 SV=1	-0.0291463	0.106793								Prohibitin 1 OS=Rattus norvegicus OX=10116 GN=Phb1 PE=1 SV=1	0.243669	0.109452
						Afadin OS=Rattus norvegicus OX=10116 GN=Afdn PE=1 SV=1	-0.0291463	0.114639								Heterogeneous nuclear ribonucleoprotein U OS=Rattus norvegicus OX=10116 GN=Hnrnpu PE=1 SV=1	0.246104	0.234054
						Bat4 OS=Rattus norvegicus OX=10116 GN=Gpank1 PE=4 SV=1	-0.0291463	0.119758								Disks large homolog 2 OS=Rattus norvegicus OX=10116 GN=Dlg2 PE=1 SV=1	0.24732	0.745604
						T-complex protein 1 subunit alpha OS=Rattus norvegicus OX=10116 GN=Tcp1 PE=1 SV=1	-0.0291463	0.137869								Alpha-1,3/1,6-mannosyltransferase ALG2 OS=Rattus norvegicus OX=10116 GN=Alg2 PE=1 SV=1	0.248535	0.760473
						Proteasome subunit beta type-2 OS=Rattus norvegicus OX=10116 GN=Psmb2 PE=1 SV=1	-0.0291463	0.137869								Carboxylic ester hydrolase OS=Rattus norvegicus OX=10116 GN=Ces1a PE=1 SV=1	0.249749	0.586802
						Ceruloplasmin OS=Rattus norvegicus OX=10116 GN=Cp PE=1 SV=3	-0.0291463	0.145694								Keratin, type II cytoskeletal 80 OS=Rattus norvegicus OX=10116 GN=Krt80 PE=3 SV=1	0.249749	0.0792462
						Serine/threonine-protein phosphatase 2A catalytic subunit alpha isoform OS=Rattus norvegicus OX=10116 GN=Ppp2ca PE=1 SV=1	-0.0291463	0.172631								H(+)-transporting two-sector ATPase OS=Rattus norvegicus OX=10116 GN=Atp6v1a PE=1 SV=1	0.252173	0.363379
						RCG60540, isoform CRA_a OS=Rattus norvegicus OX=10116 GN=U2af1 PE=1 SV=1	-0.0291463	0.172631								ATP synthase subunit f, mitochondrial OS=Rattus norvegicus OX=10116 GN=Atp5mf PE=1 SV=1	0.253384	0.829216
						6-phosphogluconolactonase OS=Rattus norvegicus OX=10116 GN=Pgls PE=1 SV=1	-0.0291463	0.172631								Trifunctional enzyme subunit alpha, mitochondrial OS=Rattus norvegicus OX=10116 GN=Hadha PE=1 SV=2	0.253384	0.23914
						Glucose-6-phosphate isomerase OS=Rattus norvegicus OX=10116 GN=Gpi PE=1 SV=1	-0.0291463	0.20621								Inter-alpha-trypsin inhibitor heavy chain H3 OS=Rattus norvegicus OX=10116 GN=Itih3 PE=1 SV=3	0.255803	0.321322
						26S proteasome regulatory subunit 4 OS=Rattus norvegicus OX=10116 GN=Psmc1 PE=1 SV=1	-0.0291463	0.208309								AP-2 complex subunit alpha OS=Rattus norvegicus OX=10116 GN=Ap2a1 PE=1 SV=1	0.257011	0.234054
						Reticulon-4 OS=Rattus norvegicus OX=10116 GN=Rtn4 PE=1 SV=1	-0.0291463	0.259637								Ig-like domain-containing protein OS=Rattus norvegicus OX=10116 PE=1 SV=3	0.260628	0.363379
						Serine/threonine-protein kinase MRCK beta OS=Rattus norvegicus OX=10116 GN=Cdc42bpb PE=1 SV=1	-0.0291463	0.269218								Malate dehydrogenase, mitochondrial OS=Rattus norvegicus OX=10116 GN=Mdh2 PE=1 SV=2	0.260628	0.234054
						ATP synthase subunit beta, mitochondrial OS=Rattus norvegicus OX=10116 GN=Atp5f1b PE=1 SV=2	-0.0291463	0.270835								Ankyrin-3 OS=Rattus norvegicus OX=10116 GN=Ank3 PE=1 SV=1	0.261832	0.43358
						Striatin-3 OS=Rattus norvegicus OX=10116 GN=Strn3 PE=1 SV=1	-0.0144996	0.00656377								Adiponectin a OS=Rattus norvegicus OX=10116 GN=C1qb PE=1 SV=1	0.271426	0.174432
						Rap guanine nucleotide exchange factor 4 OS=Rattus norvegicus OX=10116 GN=Rapgef4 PE=1 SV=3	-0.0144996	0.00921731								ATP synthase F(0) complex subunit B1, mitochondrial OS=Rattus norvegicus OX=10116 GN=Atp5pb PE=1 SV=1	0.275007	0.553089
						Unconventional myosin-Ic OS=Rattus norvegicus OX=10116 GN=Myo1c PE=1 SV=2	-0.0144996	0.0186345								Clathrin light chain B OS=Rattus norvegicus OX=10116 GN=Cltb PE=1 SV=1	0.275007	0.495602
						26S proteasome non-ATPase regulatory subunit 1 OS=Rattus norvegicus OX=10116 GN=Psmd1 PE=1 SV=1	-0.0144996	0.0347983								Heterogeneous nuclear ribonucleoprotein D0 OS=Rattus norvegicus OX=10116 GN=Hnrnpd PE=1 SV=2	0.275007	0.050557
						Ras-related protein Rap-1b OS=Rattus norvegicus OX=10116 GN=Rap1b PE=1 SV=2	-0.0144996	0.0614803								60S ribosomal protein L12 OS=Rattus norvegicus OX=10116 GN=Rpl12 PE=2 SV=1	0.276199	0.218347
						Transaldolase OS=Rattus norvegicus OX=10116 GN=Taldo1 PE=1 SV=2	-0.0144996	0.0639892								GABA(A) receptor subunit alpha-2 OS=Rattus norvegicus OX=10116 GN=Gabra2 PE=3 SV=3	0.276199	0.0993429
						Cytosolic 10-formyltetrahydrofolate dehydrogenase OS=Rattus norvegicus OX=10116 GN=Aldh1l1 PE=1 SV=3	-0.0144996	0.069051								NADH dehydrogenase [ubiquinone] flavoprotein 1, mitochondrial OS=Rattus norvegicus OX=10116 GN=Ndufv1 PE=1 SV=1	0.27739	0.0689176
						Exocyst complex component 2 OS=Rattus norvegicus OX=10116 GN=Exoc2 PE=1 SV=1	-0.0144996	0.0899095								Serine/arginine-rich splicing factor 2 OS=Rattus norvegicus OX=10116 GN=Srsf2 PE=1 SV=3	0.27858	0.234054
						Dihydropyrimidinase-related protein 5 OS=Rattus norvegicus OX=10116 GN=Dpysl5 PE=1 SV=1	-0.0144996	0.186419								Obg-like ATPase 1 OS=Rattus norvegicus OX=10116 GN=Ola1 PE=2 SV=1	0.279768	0.760473
						Heat shock 70kDa protein 12A (Predicted), isoform CRA_a OS=Rattus norvegicus OX=10116 GN=Hspa12a PE=1 SV=1	-0.0144996	0.244888								L-lactate dehydrogenase B chain OS=Rattus norvegicus OX=10116 GN=Ldhb PE=1 SV=2	0.279768	0.389084
						Cytoskeleton-associated protein 4 OS=Rattus norvegicus OX=10116 GN=Ckap4 PE=1 SV=2	-0.0144996	0.286509								Casein kinase II subunit alpha OS=Rattus norvegicus OX=10116 GN=Csnk2a1 PE=1 SV=2	0.279768	0.0263152
						Guanine nucleotide-binding protein G(i) subunit alpha-2 OS=Rattus norvegicus OX=10116 GN=Gnai2 PE=1 SV=3	0	0.0127808								Tubulin alpha-1A chain OS=Rattus norvegicus OX=10116 GN=Tuba1a PE=1 SV=1	0.284514	0.361281
						Inosine triphosphate pyrophosphatase OS=Rattus norvegicus OX=10116 GN=Itpa PE=3 SV=1	0	0.015923								Dedicator of cytokinesis 4 OS=Rattus norvegicus OX=10116 GN=Dock4 PE=1 SV=3	0.285698	0.38398
						Ring finger protein 214 OS=Rattus norvegicus OX=10116 GN=Rnf214 PE=1 SV=3	0	0.0181814								Ig-like domain-containing protein OS=Rattus norvegicus OX=10116 PE=4 SV=2	0.285698	0.159667
						RCG62531, isoform CRA_g OS=Rattus norvegicus OX=10116 GN=Tpm3 PE=1 SV=1	0	0.0227338								Mannan-binding lectin serine protease 1 OS=Rattus norvegicus OX=10116 GN=Masp1 PE=1 SV=1	0.286881	0.553193
						Agrin OS=Rattus norvegicus OX=10116 GN=Agrn PE=1 SV=2	0	0.0231917								Adaptor-related protein complex 3 subunit sigma 2 OS=Rattus norvegicus OX=10116 GN=Ap3s2 PE=1 SV=1	0.286881	0.347661
						Dynein light intermediate chain OS=Rattus norvegicus OX=10116 GN=Dync1li1 PE=1 SV=1	0	0.02365								Pannexin OS=Rattus norvegicus OX=10116 GN=Panx2 PE=3 SV=1	0.289244	0.126264
						Endoplasmin OS=Rattus norvegicus OX=10116 GN=Hsp90b1 PE=1 SV=2	0	0.0338583								2-phospho-D-glycerate hydro-lyase OS=Rattus norvegicus OX=10116 PE=3 SV=1	0.291604	0.204229
						V-type proton ATPase subunit H OS=Rattus norvegicus OX=10116 GN=Atp6v1h PE=1 SV=1	0	0.0705811								Target of rapamycin complex 2 subunit MAPKAP1 OS=Rattus norvegicus OX=10116 GN=Mapkap1 PE=2 SV=1	0.291604	0.134397
						TBC1 domain family, member 10b OS=Rattus norvegicus OX=10116 GN=Tbc1d10b PE=1 SV=1	0	0.0899095								Arginase-1 OS=Rattus norvegicus OX=10116 GN=Arg1 PE=1 SV=2	0.291604	0.00242999
						Phosphoinositide 5-phosphatase OS=Rattus norvegicus OX=10116 GN=Synj1 PE=1 SV=3	0	0.093665								Glutathione S-transferase P OS=Rattus norvegicus OX=10116 GN=Gstp1 PE=1 SV=2	0.295135	0.385816
						Mitochondrial carrier 2 OS=Rattus norvegicus OX=10116 GN=Mtch2 PE=1 SV=1	0	0.10902								Heat shock 70kDa protein 12A (Predicted), isoform CRA_a OS=Rattus norvegicus OX=10116 GN=Hspa12a PE=1 SV=1	0.296311	0.334303
						Spectrin beta chain OS=Rattus norvegicus OX=10116 GN=Sptbn2 PE=1 SV=2	0	0.129596								Immunoglobulin heavy variable 1-58 OS=Rattus norvegicus OX=10116 GN=Ighv1-58 PE=4 SV=2	0.297485	0.943828
						Kinase D-interacting substrate of 220 kDa OS=Rattus norvegicus OX=10116 GN=Kidins220 PE=1 SV=2	0	0.137869								Tubulin beta-3 chain OS=Rattus norvegicus OX=10116 GN=Tubb3 PE=1 SV=1	0.297485	0.204229
						ATP synthase F(0) complex subunit B1, mitochondrial OS=Rattus norvegicus OX=10116 GN=Atp5pb PE=1 SV=1	0	0.143271								Sidoreflexin OS=Rattus norvegicus OX=10116 GN=Sfxn1 PE=1 SV=1	0.302173	0.213572
						Pleckstrin and Sec7 domain-containing 3 OS=Rattus norvegicus OX=10116 GN=Psd3 PE=1 SV=3	0	0.14752								Tubulin beta-2A chain OS=Rattus norvegicus OX=10116 GN=Tubb2a PE=1 SV=1	0.304511	0.321322
						Guanine nucleotide-binding protein G(s) subunit alpha isoforms short OS=Rattus norvegicus OX=10116 GN=Gnas PE=1 SV=1	0.0143553	0.0467237								Arginine--tRNA ligase, cytoplasmic OS=Rattus norvegicus OX=10116 GN=Rars1 PE=1 SV=2	0.304511	0.199815
						Pericentriolar material 1 OS=Rattus norvegicus OX=10116 GN=Pcm1 PE=1 SV=1	0.0143553	0.0840728								26S proteasome regulatory subunit 4 OS=Rattus norvegicus OX=10116 GN=Psmc1 PE=1 SV=1	0.305679	0.00370405
						Cadherin-2 OS=Rattus norvegicus OX=10116 GN=Cdh2 PE=1 SV=1	0.0143553	0.10902								Sorting nexin 4 OS=Rattus norvegicus OX=10116 GN=Snx4 PE=1 SV=1	0.306845	0.19903
						Destrin OS=Rattus norvegicus OX=10116 GN=Dstn PE=1 SV=3	0.0143553	0.121478								Membrane palmitoylated protein 6 OS=Rattus norvegicus OX=10116 GN=Mpp6 PE=1 SV=1	0.309176	0.540658
						Sodium/potassium-transporting ATPase subunit beta-2 OS=Rattus norvegicus OX=10116 GN=Atp1b2 PE=1 SV=1	0.0143553	0.121478								Immunoglobulin superfamily, member 3 OS=Rattus norvegicus OX=10116 GN=Igsf3 PE=4 SV=2	0.31034	0.268488
						Guanine nucleotide-binding protein G(q) subunit alpha OS=Rattus norvegicus OX=10116 GN=Gnaq PE=2 SV=2	0.0143553	0.156145								GTPase KRas OS=Rattus norvegicus OX=10116 GN=Kras PE=1 SV=3	0.311503	0.237323
						T-complex protein 1 subunit beta OS=Rattus norvegicus OX=10116 GN=Cct2 PE=1 SV=3	0.0285692	0.00656377								G protein pathway suppressor 2 (Predicted) OS=Rattus norvegicus OX=10116 GN=Neurl4 PE=1 SV=2	0.311503	0.182271
						Signal recognition particle subunit SRP68 OS=Rattus norvegicus OX=10116 GN=Srp68 PE=1 SV=1	0.0285692	0.00833099								Guanine nucleotide-binding protein G(z) subunit alpha OS=Rattus norvegicus OX=10116 GN=Gnaz PE=2 SV=3	0.313826	0.488803
						DnaJ homolog subfamily B member 11 OS=Rattus norvegicus OX=10116 GN=Dnajb11 PE=2 SV=1	0.0285692	0.0287242								Complement C4B (Chido blood group) OS=Rattus norvegicus OX=10116 GN=C4b PE=1 SV=1	0.313826	0.168791
						5'-3' exoribonuclease 1 OS=Rattus norvegicus OX=10116 GN=Xrn1 PE=1 SV=2	0.0285692	0.0594835								Structural maintenance of chromosomes protein OS=Rattus norvegicus OX=10116 GN=Smc4 PE=1 SV=1	0.314986	0.00471915
						Vacuolar protein sorting-associated protein 4A OS=Rattus norvegicus OX=10116 GN=Vps4a PE=1 SV=1	0.0285692	0.0726296								Vesicle-fusing ATPase OS=Rattus norvegicus OX=10116 GN=Nsf PE=1 SV=1	0.316146	0.299211
						Myosin, heavy polypeptide 10, non-muscle, isoform CRA_b OS=Rattus norvegicus OX=10116 GN=Myh10 PE=1 SV=1	0.0285692	0.09691								Synaptogyrin 3 OS=Rattus norvegicus OX=10116 GN=Syngr3 PE=1 SV=1	0.316146	0.237323
						Phytanoyl-CoA hydroxylase-interacting protein OS=Rattus norvegicus OX=10116 GN=Phyhip PE=2 SV=1	0.0285692	0.120331								Cytochrome b-c1 complex subunit 2, mitochondrial OS=Rattus norvegicus OX=10116 GN=Uqcrc2 PE=1 SV=2	0.324235	1.16234
						Mitochondrial proton/calcium exchanger protein OS=Rattus norvegicus OX=10116 GN=Letm1 PE=1 SV=1	0.0285692	0.129011								Murinoglobulin-1 OS=Rattus norvegicus OX=10116 GN=LOC297568 PE=1 SV=3	0.325386	0.0656968
						Sarcoplasmic/endoplasmic reticulum calcium ATPase 2 OS=Rattus norvegicus OX=10116 GN=Atp2a2 PE=1 SV=1	0.0285692	0.129596								Valine--tRNA ligase OS=Rattus norvegicus OX=10116 GN=Vars1 PE=2 SV=2	0.326537	0.092928
						T-complex protein 1 subunit gamma OS=Rattus norvegicus OX=10116 GN=Cct3 PE=1 SV=1	0.0285692	0.173277								Lipoprotein lipase OS=Rattus norvegicus OX=10116 GN=Lpl PE=1 SV=1	0.332278	0.246408
						Fatty acid synthase OS=Rattus norvegicus OX=10116 GN=Fasn PE=1 SV=3	0.0285692	0.21467								RCG21069 OS=Rattus norvegicus OX=10116 GN=rCG_21069 PE=1 SV=2	0.332278	0.0594701
						Neurofibromin OS=Rattus norvegicus OX=10116 GN=Nf1 PE=1 SV=1	0.0285692	0.222573								40S ribosomal protein S14 OS=Rattus norvegicus OX=10116 GN=LOC100911847 PE=1 SV=1	0.333424	0.213572
						Actin-related protein 2/3 complex subunit 4 OS=Rattus norvegicus OX=10116 GN=Arpc4 PE=1 SV=1	0.0285692	0.238824								UBC core domain-containing protein OS=Rattus norvegicus OX=10116 PE=4 SV=2	0.334568	0.128712
						Annexin A1 OS=Rattus norvegicus OX=10116 GN=Anxa1 PE=1 SV=2	0.0426443	0.00744648								Protein phosphatase 1 regulatory subunit OS=Rattus norvegicus OX=10116 GN=Ppp1r12c PE=1 SV=1	0.340277	0.476009
						Serine (Or cysteine) peptidase inhibitor, clade A (Alpha-1 antiproteinase, antitrypsin), member 9 (Predicted) OS=Rattus norvegicus OX=10116 GN=Serpina9 PE=3 SV=1	0.0426443	0.0329203								Hexokinase OS=Rattus norvegicus OX=10116 GN=Hk1 PE=1 SV=2	0.340277	0.13171
						Metal cation symporter ZIP8 OS=Rattus norvegicus OX=10116 GN=Slc39a8 PE=1 SV=1	0.0426443	0.034328								CREB3 regulatory factor OS=Rattus norvegicus OX=10116 GN=Crebrf PE=4 SV=1	0.343692	1.02907
						Annexin A2 OS=Rattus norvegicus OX=10116 GN=Anxa2 PE=1 SV=2	0.0426443	0.051587								Moesin OS=Rattus norvegicus OX=10116 GN=Msn PE=1 SV=1	0.347099	0.268488
						Ankyrin 2 OS=Rattus norvegicus OX=10116 GN=Ank2 PE=1 SV=3	0.0426443	0.0772745								4F2 cell-surface antigen heavy chain OS=Rattus norvegicus OX=10116 GN=Slc3a2 PE=1 SV=1	0.350497	0.0993429
						FERM, ARHGEF and pleckstrin domain-containing protein 1 OS=Rattus norvegicus OX=10116 GN=Farp1 PE=1 SV=2	0.0426443	0.0814455								Clathrin coat assembly protein AP180 OS=Rattus norvegicus OX=10116 GN=Snap91 PE=1 SV=1	0.351628	0.363379
						Voltage-dependent anion-selective channel protein 3 OS=Rattus norvegicus OX=10116 GN=Vdac3 PE=1 SV=1	0.0426443	0.09691								ATP synthase subunit e, mitochondrial OS=Rattus norvegicus OX=10116 GN=Atp5me PE=1 SV=3	0.353888	0.23914
						AP complex subunit sigma OS=Rattus norvegicus OX=10116 GN=Ap3s1 PE=1 SV=1	0.0426443	0.126679								Syntaphilin OS=Rattus norvegicus OX=10116 GN=Snph PE=1 SV=1	0.353888	0.234054
						Ganglioside-induced differentiation-associated-protein 1 OS=Rattus norvegicus OX=10116 GN=Gdap1 PE=3 SV=1	0.0426443	0.156145								ATP synthase subunit gamma, mitochondrial OS=Rattus norvegicus OX=10116 GN=Atp5f1c PE=1 SV=2	0.370722	0.863283
						Protein Wnt OS=Rattus norvegicus OX=10116 GN=Wnt8b PE=3 SV=2	0.0426443	0.186419								Junction plakoglobin OS=Rattus norvegicus OX=10116 GN=Jup PE=1 SV=1	0.370722	0.17945
						14-3-3 protein epsilon OS=Rattus norvegicus OX=10116 GN=Ywhae PE=1 SV=1	0.0426443	0.21467								Dihydrolipoyllysine-residue succinyltransferase component of 2-oxoglutarate dehydrogenase complex, mitochondrial OS=Rattus norvegicus OX=10116 GN=Dlst PE=1 SV=2	0.374066	0.351113
						Uveal autoantigen with coiled-coil domains and ankyrin repeats OS=Rattus norvegicus OX=10116 GN=Uaca PE=1 SV=1	0.0426443	0.262807								Dynactin subunit 2 OS=Rattus norvegicus OX=10116 GN=Dctn2 PE=1 SV=1	0.375178	0.399573
						Plexin A4 OS=Rattus norvegicus OX=10116 GN=Plxna4 PE=3 SV=1	0.0426443	0.296709								Serine/threonine-protein phosphatase 2A 55 kDa regulatory subunit B alpha isoform OS=Rattus norvegicus OX=10116 GN=Ppp2r2a PE=2 SV=1	0.375178	0.199669
						Sodium/potassium-transporting ATPase subunit alpha-3 OS=Rattus norvegicus OX=10116 GN=Atp1a3 PE=1 SV=2	0.0426443	0.380907								Regulator of G-protein signaling 7-binding protein OS=Rattus norvegicus OX=10116 GN=Rgs7bp PE=1 SV=1	0.378512	0.386372
						Ig-like domain-containing protein OS=Rattus norvegicus OX=10116 PE=1 SV=1	0.0565835	0.00966115								Similar to RIKEN cDNA 1300017J02 OS=Rattus norvegicus OX=10116 GN=RGD1310507 PE=1 SV=1	0.378512	0.254256
						Atlastin-1 OS=Rattus norvegicus OX=10116 GN=Atl1 PE=1 SV=1	0.0565835	0.0127808								Vacuolar protein sorting-associated protein 35 OS=Rattus norvegicus OX=10116 GN=Vps35 PE=1 SV=1	0.381837	0.0850647
						F-box protein 41 OS=Rattus norvegicus OX=10116 GN=Fbxo41 PE=1 SV=3	0.0565835	0.02365								D-beta-hydroxybutyrate dehydrogenase, mitochondrial OS=Rattus norvegicus OX=10116 GN=Bdh1 PE=1 SV=2	0.38405	0.848706
						Granulin, isoform CRA_c OS=Rattus norvegicus OX=10116 GN=Grn PE=3 SV=1	0.0565835	0.0277972								Serine/arginine-rich splicing factor 5 OS=Rattus norvegicus OX=10116 GN=Srsf5 PE=1 SV=1	0.38405	0.229893
						E3 ubiquitin-protein ligase RNF8 OS=Rattus norvegicus OX=10116 GN=Rnf8 PE=2 SV=1	0.0565835	0.0619809								Liprin-alpha-4 OS=Rattus norvegicus OX=10116 GN=Ppfia4 PE=1 SV=3	0.38405	0.029397
						Complement C5 (Fragment) OS=Rattus norvegicus OX=10116 GN=C5 PE=1 SV=1	0.0565835	0.0840728								Synapsin-2 OS=Rattus norvegicus OX=10116 GN=Syn2 PE=1 SV=1	0.390668	0.992072
						Hydroxymethylglutaryl-CoA synthase, cytoplasmic OS=Rattus norvegicus OX=10116 GN=Hmgcs1 PE=1 SV=1	0.0565835	0.119758								Methionine--tRNA ligase, cytoplasmic OS=Rattus norvegicus OX=10116 GN=Mars PE=1 SV=1	0.390668	0.230804
						RNA helicase OS=Rattus norvegicus OX=10116 GN=Dhx30 PE=1 SV=1	0.0565835	0.121478								Amine oxidase [flavin-containing] A OS=Rattus norvegicus OX=10116 GN=Maoa PE=1 SV=1	0.391768	0.160627
						Transitional endoplasmic reticulum ATPase OS=Rattus norvegicus OX=10116 GN=Vcp PE=1 SV=3	0.0565835	0.126098								Signal-induced proliferation-associated 1-like protein 2 OS=Rattus norvegicus OX=10116 GN=Sipa1l2 PE=1 SV=3	0.395063	0.0635596
						NADH dehydrogenase [ubiquinone] 1 alpha subcomplex subunit 10, mitochondrial OS=Rattus norvegicus OX=10116 GN=Ndufa10 PE=1 SV=1	0.0565835	0.19044								Histone H2A type 3 OS=Rattus norvegicus OX=10116 PE=2 SV=3	0.396159	0.368551
						Proteasome subunit beta OS=Rattus norvegicus OX=10116 GN=Psmb5 PE=1 SV=1	0.0565835	0.221849								FMR1 autosomal homolog 2 OS=Rattus norvegicus OX=10116 GN=Fxr2 PE=1 SV=1	0.39835	0.306236
						Ankyrin 2 OS=Rattus norvegicus OX=10116 GN=Ank2 PE=1 SV=1	0.0565835	0.238072								Neuromodulin OS=Rattus norvegicus OX=10116 GN=Gap43 PE=1 SV=1	0.39835	0.301229
						Microtubule-associated protein RP/EB family member 2 OS=Rattus norvegicus OX=10116 PE=3 SV=2	0.0565835	0.270835								Solute carrier family 25 member 12 OS=Rattus norvegicus OX=10116 GN=Slc25a12 PE=1 SV=3	0.399445	0.943828
						PTPRF-interacting protein alpha 2 OS=Rattus norvegicus OX=10116 GN=Ppfia2 PE=1 SV=2	0.0565835	0.274088								Similar to 60S ribosomal protein L23a OS=Rattus norvegicus OX=10116 GN=RGD1564606 PE=3 SV=1	0.400538	0.192832
						Catalase OS=Rattus norvegicus OX=10116 GN=Cat PE=1 SV=3	0.0703893	0.00612309								Phenylalanine--tRNA ligase alpha subunit OS=Rattus norvegicus OX=10116 GN=Farsa PE=1 SV=1	0.40163	0.0114788
						Microtubule-associated protein 1B OS=Rattus norvegicus OX=10116 GN=Map1b PE=1 SV=3	0.0703893	0.0222764								Pleckstrin and Sec7 domain-containing 3 OS=Rattus norvegicus OX=10116 GN=Psd3 PE=1 SV=3	0.409255	0.292235
						C-terminal-binding protein 1 OS=Rattus norvegicus OX=10116 GN=Ctbp1 PE=1 SV=1	0.0703893	0.0385789								Basal cell adhesion molecule OS=Rattus norvegicus OX=10116 GN=Bcam PE=2 SV=1	0.411426	0.487327
						Dynamin-like 120 kDa protein, mitochondrial OS=Rattus norvegicus OX=10116 GN=Opa1 PE=1 SV=1	0.0703893	0.051587								Stomatin-like protein 2, mitochondrial OS=Rattus norvegicus OX=10116 GN=Stoml2 PE=1 SV=1	0.412511	0.234054
						Unconventional myosin-XVIIIa OS=Rattus norvegicus OX=10116 GN=Myo18a PE=1 SV=1	0.0703893	0.0909791								CMP-N-acetylneuraminic acid synthase OS=Rattus norvegicus OX=10116 GN=Cmas PE=1 SV=1	0.414677	0.539534
						Alpha-tubulin N-acetyltransferase 1 OS=Rattus norvegicus OX=10116 GN=Atat1 PE=1 SV=1	0.0703893	0.104577								Desmoplakin OS=Rattus norvegicus OX=10116 GN=Dsp PE=1 SV=1	0.414677	0.219547
						Hebp1 protein OS=Rattus norvegicus OX=10116 GN=Hebp1 PE=1 SV=1	0.0703893	0.118615								Keratin 78 (Fragment) OS=Rattus norvegicus OX=10116 GN=Krt78 PE=4 SV=1	0.415759	0.0299645
						Dynactin subunit 4 OS=Rattus norvegicus OX=10116 GN=Dctn4 PE=1 SV=1	0.0703893	0.121478								60S acidic ribosomal protein P0 OS=Rattus norvegicus OX=10116 GN=Rplp0 PE=1 SV=2	0.41684	0.30763
						Eukaryotic translation initiation factor 3 subunit A OS=Rattus norvegicus OX=10116 GN=Eif3a PE=2 SV=2	0.0703893	0.149354								Rab GDP dissociation inhibitor beta OS=Rattus norvegicus OX=10116 GN=Gdi2 PE=1 SV=2	0.41792	0.729683
						Serine protease HTRA1 OS=Rattus norvegicus OX=10116 GN=Htra1 PE=2 SV=1	0.0703893	0.152427								Zinc finger, C2HC-type-containing 1A OS=Rattus norvegicus OX=10116 GN=Zc2hc1a PE=1 SV=1	0.423309	0.206843
						Tyrosine--tRNA ligase, cytoplasmic OS=Rattus norvegicus OX=10116 GN=Yars1 PE=2 SV=3	0.0703893	0.170696								Cytochrome c-1 OS=Rattus norvegicus OX=10116 GN=Cyc1 PE=1 SV=3	0.427606	1.0616
						Serine/threonine-protein kinase TAO1 OS=Rattus norvegicus OX=10116 GN=Taok1 PE=1 SV=3	0.0703893	0.202732								Mitochondrial fission regulator 1-like OS=Rattus norvegicus OX=10116 GN=Mtfr1l PE=1 SV=1	0.427606	0.103632
						Visinin-like protein 1 OS=Rattus norvegicus OX=10116 GN=Vsnl1 PE=1 SV=2	0.0703893	0.216096								26S proteasome regulatory subunit 6B OS=Rattus norvegicus OX=10116 GN=Psmc4 PE=1 SV=1	0.428678	0.183573
						Multivesicular body subunit 12B OS=Rattus norvegicus OX=10116 GN=Mvb12b PE=3 SV=2	0.0703893	0.266001								WD repeat-containing protein 7 OS=Rattus norvegicus OX=10116 GN=Wdr7 PE=1 SV=1	0.432959	0.848706
						Heat shock protein HSP 90-alpha OS=Rattus norvegicus OX=10116 GN=Hsp90aa1 PE=1 SV=3	0.0703893	0.270026								Non-POU domain-containing octamer-binding protein OS=Rattus norvegicus OX=10116 GN=Nono PE=1 SV=3	0.434028	0.0885638
						Trifunctional enzyme subunit alpha, mitochondrial OS=Rattus norvegicus OX=10116 GN=Hadha PE=1 SV=2	0.0703893	0.294136								Dolichyl-diphosphooligosaccharide--protein glycosyltransferase subunit 2 OS=Rattus norvegicus OX=10116 GN=Rpn2 PE=2 SV=2	0.443607	0.0265704
						C3/C5 convertase OS=Rattus norvegicus OX=10116 GN=Cfb PE=1 SV=1	0.0703893	0.355561								Sodium/potassium-transporting ATPase subunit alpha-3 OS=Rattus norvegicus OX=10116 GN=Atp1a3 PE=1 SV=2	0.447844	0.610068
						RCG25192, isoform CRA_c OS=Rattus norvegicus OX=10116 GN=Ss18l2 PE=3 SV=1	0.0703893	0.417937								MAGUK p55 subfamily member 2 OS=Rattus norvegicus OX=10116 GN=Mpp2 PE=1 SV=2	0.448901	1.36841
						Syntenin-1 OS=Rattus norvegicus OX=10116 GN=Sdcbp PE=1 SV=1	0.0703893	0.481486								Triosephosphate isomerase OS=Rattus norvegicus OX=10116 GN=Tpi1 PE=1 SV=2	0.449957	0.19903
						Sodium- and chloride-dependent GABA transporter 1 OS=Rattus norvegicus OX=10116 GN=Slc6a1 PE=1 SV=1	0.0703893	0.534617								Isocitrate dehydrogenase [NAD] subunit, mitochondrial OS=Rattus norvegicus OX=10116 GN=Idh3g PE=1 SV=1	0.462576	0.943828
						Sideroflexin-1 OS=Rattus norvegicus OX=10116 GN=Sfxn1 PE=2 SV=4	0.0840643	0.00656377								ATP synthase subunit alpha, mitochondrial OS=Rattus norvegicus OX=10116 GN=Atp5f1a PE=1 SV=2	0.465713	0.807488
						Dihydrolipoyllysine-residue acetyltransferase component of pyruvate dehydrogenase complex, mitochondrial OS=Rattus norvegicus OX=10116 GN=Dlat PE=1 SV=3	0.0840643	0.0123337								Calcium-binding and coiled-coil domain-containing protein 1 OS=Rattus norvegicus OX=10116 GN=Calcoco1 PE=2 SV=1	0.480265	0.848706
						Adhesion G protein-coupled receptor L1 OS=Rattus norvegicus OX=10116 GN=Adgrl1 PE=1 SV=1	0.0840643	0.0282604								Microtubule-associated protein 1B OS=Rattus norvegicus OX=10116 GN=Map1b PE=1 SV=3	0.484396	0.518789
						Actin-like protein 3 OS=Rattus norvegicus OX=10116 GN=Actr3 PE=1 SV=1	0.0840643	0.0665127								Mitochondrial ribosomal protein S9 OS=Rattus norvegicus OX=10116 GN=Mrps9 PE=1 SV=1	0.503858	0.257051
						60S acidic ribosomal protein P1 OS=Rattus norvegicus OX=10116 GN=Rplp1 PE=3 SV=1	0.0840643	0.0861861								60S ribosomal protein L24 OS=Rattus norvegicus OX=10116 GN=Rpl24 PE=1 SV=1	0.508936	0.207759
						14-3-3 protein eta OS=Rattus norvegicus OX=10116 GN=Ywhah PE=1 SV=2	0.0840643	0.0979971								Ras-specific guanine nucleotide-releasing factor 1 OS=Rattus norvegicus OX=10116 GN=Rasgrf1 PE=1 SV=1	0.511974	0.630661
						A-kinase anchor protein 2 OS=Rattus norvegicus OX=10116 GN=Akap2 PE=1 SV=1	0.0840643	0.121478								Beta-adducin OS=Rattus norvegicus OX=10116 GN=Add2 PE=1 SV=4	0.521051	0.63348
						60 kDa heat shock protein, mitochondrial OS=Rattus norvegicus OX=10116 GN=Hspd1 PE=1 SV=1	0.0840643	0.19044								40S ribosomal protein S13 OS=Rattus norvegicus OX=10116 GN=Rps13 PE=1 SV=2	0.524064	0.760473
						Tomoregulin-1 OS=Rattus norvegicus OX=10116 GN=Tmeff1 PE=2 SV=1	0.0840643	0.20621								Synaptophysin OS=Rattus norvegicus OX=10116 GN=Syp PE=1 SV=1	0.535058	1.32857
						Pyruvate carboxylase OS=Rattus norvegicus OX=10116 GN=Pc PE=1 SV=1	0.0840643	0.233587								Ganglioside-induced differentiation-associated-protein 1 OS=Rattus norvegicus OX=10116 GN=Gdap1 PE=3 SV=1	0.541019	0.25138
						Transketolase OS=Rattus norvegicus OX=10116 GN=Tkt PE=1 SV=1	0.0840643	0.270026								AP-3 complex subunit mu-1 OS=Rattus norvegicus OX=10116 GN=Ap3m1 PE=1 SV=1	0.54498	0.229893
						FGF1 intracellular-binding protein OS=Rattus norvegicus OX=10116 GN=Fibp PE=2 SV=1	0.0840643	0.296709								Glutaminase OS=Rattus norvegicus OX=10116 GN=Gls PE=1 SV=1	0.553852	0.325119
						FLII, actin-remodeling protein OS=Rattus norvegicus OX=10116 GN=Flii PE=1 SV=1	0.0840643	0.357535								RCG21137 OS=Rattus norvegicus OX=10116 GN=Pgam5 PE=1 SV=1	0.557778	0.553193
						Ras-related protein Rab-7a OS=Rattus norvegicus OX=10116 GN=Rab7a PE=1 SV=2	0.0840643	0.383								Synapsin-1 OS=Rattus norvegicus OX=10116 GN=Syn1 PE=1 SV=3	0.558757	0.35313
						Vesicular glutamate transporter 1 OS=Rattus norvegicus OX=10116 GN=Slc17a7 PE=1 SV=1	0.0840643	0.501689								ATP synthase subunit d, mitochondrial OS=Rattus norvegicus OX=10116 GN=Atp5pd PE=1 SV=3	0.56267	0.518789
						T-complex protein 1 subunit delta OS=Rattus norvegicus OX=10116 GN=Cct4 PE=1 SV=3	0.0840643	0.600326								Vesicle-associated membrane protein 3 OS=Rattus norvegicus OX=10116 GN=Vamp3 PE=1 SV=1	0.566572	0.024875
						Antithrombin-III OS=Rattus norvegicus OX=10116 GN=Serpinc1 PE=1 SV=1	0.0840643	0.761954								TBC1 domain family, member 10b OS=Rattus norvegicus OX=10116 GN=Tbc1d10b PE=1 SV=1	0.57628	0.0593
						Band 4.1-like protein 1 OS=Rattus norvegicus OX=10116 GN=Epb41l1 PE=1 SV=1	0.0976108	0.0127808								Proteasome subunit alpha type-1 OS=Rattus norvegicus OX=10116 GN=Psma1 PE=1 SV=2	0.590722	0.148583
						Protein kinase C epsilon type OS=Rattus norvegicus OX=10116 GN=Prkce PE=1 SV=1	0.0976108	0.0222764								Tyrosine--tRNA ligase, cytoplasmic OS=Rattus norvegicus OX=10116 GN=Yars1 PE=2 SV=3	0.593593	0.128834
						Actin-related protein 2 OS=Rattus norvegicus OX=10116 GN=Actr2 PE=2 SV=1	0.0976108	0.0486625								Ig gamma-2C chain C region OS=Rattus norvegicus OX=10116 PE=2 SV=1	0.601221	0.571387
						Ubiquitin carboxyl-terminal hydrolase isozyme L1 OS=Rattus norvegicus OX=10116 GN=Uchl1 PE=1 SV=2	0.0976108	0.0639892								Progranulin OS=Rattus norvegicus OX=10116 GN=Grn PE=1 SV=3	0.612588	0.339194
						Catenin (Cadherin associated protein), delta 1 (Predicted), isoform CRA_a OS=Rattus norvegicus OX=10116 GN=Ctnnd1 PE=1 SV=1	0.0976108	0.0757207								Olfactory receptor OS=Rattus norvegicus OX=10116 GN=Olr791 PE=3 SV=1	0.617298	0.698604
						RCG27497 OS=Rattus norvegicus OX=10116 GN=LOC296235 PE=4 SV=1	0.0976108	0.0990869								NDUFA4, mitochondrial complex-associated OS=Rattus norvegicus OX=10116 GN=Ndufa4 PE=1 SV=1	0.621993	0.401967
						Biliverdin reductase B OS=Rattus norvegicus OX=10116 GN=Blvrb PE=1 SV=1	0.0976108	0.102923								Mannosyl-oligosaccharide glucosidase OS=Rattus norvegicus OX=10116 GN=Mogs PE=1 SV=1	0.624803	0.370285
						Pyrroline-5-carboxylate reductase 2 OS=Rattus norvegicus OX=10116 GN=Pycr2 PE=2 SV=1	0.0976108	0.104577								DNA-directed DNA polymerase OS=Rattus norvegicus OX=10116 GN=Polq PE=3 SV=1	0.62854	0.407393
						Metavinculin OS=Rattus norvegicus OX=10116 GN=Vcl PE=1 SV=1	0.0976108	0.110138								RAB11 family interacting protein 2 (Class I) (Predicted), isoform CRA_a OS=Rattus norvegicus OX=10116 GN=Rab11fip2 PE=4 SV=2	0.630405	0.148583
						Complement C1q subcomponent subunit C OS=Rattus norvegicus OX=10116 GN=C1qc PE=1 SV=2	0.0976108	0.116339								Misshapen-like kinase 1 OS=Rattus norvegicus OX=10116 GN=Mink1 PE=1 SV=3	0.633199	0.808289
						Myosin regulatory light chain 12B OS=Rattus norvegicus OX=10116 GN=Myl12b PE=4 SV=1	0.0976108	0.123782								Calcium/calmodulin-dependent protein kinase type II subunit gamma OS=Rattus norvegicus OX=10116 GN=Camk2g PE=1 SV=1	0.633199	0.617503
						Triosephosphate isomerase OS=Rattus norvegicus OX=10116 GN=Tpi1 PE=1 SV=2	0.0976108	0.127261								Serine/threonine-protein kinase MARK1 OS=Rattus norvegicus OX=10116 GN=Mark1 PE=1 SV=1	0.641546	0.284018
						Tubulin gamma chain OS=Rattus norvegicus OX=10116 GN=Tubg2 PE=3 SV=2	0.0976108	0.153045								Barrier-to-autointegration factor OS=Rattus norvegicus OX=10116 GN=Banf1 PE=1 SV=1	0.650765	0.0635596
						Phosphate carrier protein, mitochondrial OS=Rattus norvegicus OX=10116 GN=Slc25a3 PE=1 SV=1	0.0976108	0.224026								ATP synthase subunit O, mitochondrial OS=Rattus norvegicus OX=10116 GN=Atp5po PE=1 SV=1	0.658097	0.760473
						Actin-related protein 2/3 complex subunit 3 OS=Rattus norvegicus OX=10116 GN=Arpc3 PE=1 SV=1	0.0976108	0.241088								Acetyl-CoA acetyltransferase, mitochondrial OS=Rattus norvegicus OX=10116 GN=Acat1 PE=1 SV=1	0.659925	0.363379
						Ras-related protein Ral-A OS=Rattus norvegicus OX=10116 GN=Rala PE=1 SV=1	0.0976108	0.35164								Zinc finger protein 605 OS=Rattus norvegicus OX=10116 GN=Zfp605 PE=4 SV=3	0.67084	1.09261
						Complement C3 OS=Rattus norvegicus OX=10116 GN=C3 PE=1 SV=1	0.0976108	0.406714								NADH dehydrogenase [ubiquinone] flavoprotein 2, mitochondrial OS=Rattus norvegicus OX=10116 GN=Ndufv2 PE=1 SV=2	0.673556	0.805065
						Dynactin subunit 3 OS=Rattus norvegicus OX=10116 GN=Dctn3 PE=1 SV=1	0.111031	0.0665127								Similar to keratinocytes proline-rich protein OS=Rattus norvegicus OX=10116 GN=LOC686143 PE=4 SV=3	0.675364	0.25138
						Plasminogen OS=Rattus norvegicus OX=10116 GN=Plg PE=2 SV=2	0.111031	0.0670192								Voltage-gated potassium channel subunit beta-1 OS=Rattus norvegicus OX=10116 GN=Kcnab1 PE=1 SV=1	0.678072	1.18729
						Septin OS=Rattus norvegicus OX=10116 GN=Sept5 PE=1 SV=1	0.111031	0.0757207								Leucine-rich glioma-inactivated protein 1 OS=Rattus norvegicus OX=10116 GN=Lgi1 PE=1 SV=1	0.687956	1.32857
						Peroxiredoxin-1 OS=Rattus norvegicus OX=10116 PE=3 SV=1	0.111031	0.0872467								Succinate--CoA ligase [ADP-forming] subunit beta, mitochondrial OS=Rattus norvegicus OX=10116 GN=Sucla2 PE=1 SV=1	0.687956	0.463742
						Cortactin, isoform CRA_c OS=Rattus norvegicus OX=10116 GN=Cttn PE=1 SV=3	0.111031	0.21467								IQ motif and SEC7 domain-containing protein 1 OS=Rattus norvegicus OX=10116 GN=Iqsec1 PE=1 SV=1	0.687956	0.287129
						Mitochondrial 2-oxoglutarate/malate carrier protein OS=Rattus norvegicus OX=10116 GN=Slc25a11 PE=1 SV=1	0.111031	0.232844								Sodium/potassium-transporting ATPase subunit alpha OS=Rattus norvegicus OX=10116 GN=Atp12a PE=3 SV=1	0.689746	0.807488
						Prothrombin OS=Rattus norvegicus OX=10116 GN=F2 PE=1 SV=1	0.111031	0.258848								Fructose-bisphosphate aldolase A OS=Rattus norvegicus OX=10116 GN=Aldoa PE=1 SV=2	0.689746	0.460322
						ArfGAP with GTPase domain, ankyrin repeat and PH domain 1 OS=Rattus norvegicus OX=10116 GN=Agap1 PE=3 SV=1	0.111031	0.269218								40S ribosomal protein S26 OS=Rattus norvegicus OX=10116 GN=Rps26 PE=3 SV=3	0.703101	0.275048
						Fructose-bisphosphate aldolase OS=Rattus norvegicus OX=10116 GN=Aldoc PE=1 SV=1	0.111031	0.336299								Keratin, type II cytoskeletal 72 OS=Rattus norvegicus OX=10116 GN=Krt72 PE=3 SV=1	0.707525	0.760473
						T-complex protein 1 subunit epsilon OS=Rattus norvegicus OX=10116 GN=Cct5 PE=1 SV=1	0.124328	0.0127808								L-lactate dehydrogenase A chain OS=Rattus norvegicus OX=10116 GN=Ldha PE=1 SV=1	0.726831	0.296231
						Plakophilin 1 OS=Rattus norvegicus OX=10116 GN=Pkp1 PE=3 SV=2	0.124328	0.0376307								40S ribosomal protein S23 OS=Rattus norvegicus OX=10116 GN=Rps23 PE=1 SV=3	0.731183	0.544835
						26S proteasome non-ATPase regulatory subunit 4 OS=Rattus norvegicus OX=10116 GN=Psmd4 PE=1 SV=1	0.124328	0.0639892								Dual specificity mitogen-activated protein kinase kinase 1 OS=Rattus norvegicus OX=10116 GN=Map2k1 PE=1 SV=2	0.740712	0.518789
						LanC lantibiotic synthetase component C-like 2 (Bacterial) OS=Rattus norvegicus OX=10116 GN=Lancl2 PE=1 SV=1	0.124328	0.0979971								Potassium voltage-gated channel subfamily A member 6 OS=Rattus norvegicus OX=10116 GN=Kcna6 PE=4 SV=1	0.744161	0.229893
						RAB5C, member RAS oncogene family OS=Rattus norvegicus OX=10116 GN=Rab5c PE=1 SV=1	0.124328	0.135489								C-Jun-amino-terminal kinase-interacting protein 3 OS=Rattus norvegicus OX=10116 GN=Mapk8ip3 PE=1 SV=2	0.748461	0.482657
						Kinetochore scaffold 1 OS=Rattus norvegicus OX=10116 GN=Knl1 PE=4 SV=2	0.124328	0.139662								Similar to T-cell activation Rho GTPase-activating protein isoform b OS=Rattus norvegicus OX=10116 GN=LOC365791 PE=1 SV=1	0.762987	1.27558
						Trifunctional enzyme subunit beta, mitochondrial OS=Rattus norvegicus OX=10116 GN=Hadhb PE=1 SV=1	0.124328	0.186419								AP-2 complex subunit alpha-2 OS=Rattus norvegicus OX=10116 GN=Ap2a2 PE=1 SV=3	0.772308	0.884447
						Voltage-dependent anion-selective channel protein 2 OS=Rattus norvegicus OX=10116 GN=Vdac2 PE=1 SV=2	0.124328	0.275724								Dephospho-CoA kinase domain-containing protein OS=Rattus norvegicus OX=10116 GN=Dcakd PE=2 SV=1	0.783247	0.311395
						Cytoplasmic dynein 1 heavy chain 1 OS=Rattus norvegicus OX=10116 GN=Dync1h1 PE=1 SV=2	0.124328	0.281498								Trifunctional enzyme subunit beta, mitochondrial OS=Rattus norvegicus OX=10116 GN=Hadhb PE=1 SV=1	0.786596	0.357321
						Ras-related protein Rab-14 OS=Rattus norvegicus OX=10116 GN=Rab14 PE=1 SV=3	0.124328	0.296709								ATPase, H+ transporting, V1 subunit E isoform 1, isoform CRA_a OS=Rattus norvegicus OX=10116 GN=Atp6v1e1 PE=1 SV=1	0.793272	0.422012
						Clathrin heavy chain 1 OS=Rattus norvegicus OX=10116 GN=Cltc PE=1 SV=3	0.124328	0.327902								Isocitrate dehydrogenase [NAD] subunit beta, mitochondrial OS=Rattus norvegicus OX=10116 GN=Idh3B PE=2 SV=1	0.80488	0.999128
						Retrotransposon Gag-like 9 OS=Rattus norvegicus OX=10116 GN=Rtl9 PE=4 SV=2	0.124328	0.436519								AP complex subunit sigma OS=Rattus norvegicus OX=10116 GN=Ap3s1 PE=1 SV=1	0.80488	0.0279197
						Inter-alpha trypsin inhibitor, heavy chain 1 OS=Rattus norvegicus OX=10116 GN=Itih1 PE=1 SV=1	0.124328	0.457175								Pyrroline-5-carboxylate reductase 2 OS=Rattus norvegicus OX=10116 GN=Pycr2 PE=2 SV=1	0.812293	0.537297
						RAB1B, member RAS oncogene family OS=Rattus norvegicus OX=10116 GN=LOC100363782 PE=1 SV=1	0.137504	0.00788851								Glutamate dehydrogenase 1, mitochondrial OS=Rattus norvegicus OX=10116 GN=Glud1 PE=1 SV=2	0.819668	0.325119
						NADH-cytochrome b5 reductase OS=Rattus norvegicus OX=10116 GN=Cyb5r1 PE=1 SV=1	0.137504	0.02365								Synaptotagmin-1 OS=Rattus norvegicus OX=10116 GN=Syt1 PE=1 SV=3	0.827006	0.368551
						T-complex protein 1 subunit eta OS=Rattus norvegicus OX=10116 GN=Cct7 PE=1 SV=1	0.137504	0.0329203								Myelin expression factor 2 OS=Rattus norvegicus OX=10116 GN=Myef2 PE=1 SV=1	0.84559	1.16234
						Prohibitin OS=Rattus norvegicus OX=10116 GN=Phb2 PE=1 SV=1	0.137504	0.0710923								40S ribosomal protein S8 OS=Rattus norvegicus OX=10116 GN=Rps8 PE=1 SV=2	0.847195	0.306236
						HECT-type E3 ubiquitin transferase OS=Rattus norvegicus OX=10116 GN=Hecw2 PE=1 SV=1	0.137504	0.076756								Mitogen-activated protein kinase 3 OS=Rattus norvegicus OX=10116 GN=Mapk3 PE=1 SV=5	0.862352	0.363379
						Acyl-CoA thioesterase 9 OS=Rattus norvegicus OX=10116 GN=Acot9 PE=1 SV=1	0.137504	0.0788339								RCG60540, isoform CRA_a OS=Rattus norvegicus OX=10116 GN=U2af1 PE=1 SV=1	0.864731	0.760473
						Protein ERGIC-53 OS=Rattus norvegicus OX=10116 GN=Lman1 PE=1 SV=1	0.137504	0.0798767								Sideroflexin-3 OS=Rattus norvegicus OX=10116 GN=Sfxn3 PE=2 SV=1	0.869477	0.701095
						EGF-like repeats and discoidin domains 3 OS=Rattus norvegicus OX=10116 GN=Edil3 PE=4 SV=3	0.137504	0.19044								Tomoregulin-1 OS=Rattus norvegicus OX=10116 GN=Tmeff1 PE=2 SV=1	0.874994	0.0940628
						PH and SEC7 domain-containing protein 1 OS=Rattus norvegicus OX=10116 GN=Psd PE=1 SV=1	0.137504	0.229885								Elongation factor 1-alpha 2 OS=Rattus norvegicus OX=10116 GN=Eef1a2 PE=1 SV=1	0.884403	0.438135
						Perilipin OS=Rattus norvegicus OX=10116 GN=Plin1 PE=1 SV=1	0.137504	0.317855								Cyth1 protein OS=Rattus norvegicus OX=10116 GN=Cyth1 PE=2 SV=1	0.891419	0.551912
						Kinesin-like protein KIF1B OS=Rattus norvegicus OX=10116 GN=Kif1b PE=1 SV=1	0.137504	0.341989								Semaphorin-3C OS=Rattus norvegicus OX=10116 GN=Sema3c PE=3 SV=1	0.900722	0.363238
						DUF4592 domain-containing protein OS=Rattus norvegicus OX=10116 GN=RGD1310819 PE=1 SV=3	0.137504	0.429457								Protein-glutamine gamma-glutamyltransferase E OS=Rattus norvegicus OX=10116 GN=Tgm3 PE=3 SV=1	0.906121	0.135898
						Serine--tRNA ligase, cytoplasmic OS=Rattus norvegicus OX=10116 GN=Sars1 PE=1 SV=3	0.137504	0.431798								SOGA family member 3 OS=Rattus norvegicus OX=10116 GN=Soga3 PE=1 SV=1	0.9115	0.160627
						Guanine nucleotide-binding protein G(z) subunit alpha OS=Rattus norvegicus OX=10116 GN=Gnaz PE=2 SV=3	0.137504	0.730487								Dolichol-phosphate mannosyltransferase subunit 1 OS=Rattus norvegicus OX=10116 GN=Dpm1 PE=1 SV=1	0.933573	0.18803
						Monocarboxylate transporter 8 OS=Rattus norvegicus OX=10116 GN=SLC16A2 PE=1 SV=1	0.15056	0.0231917								Heat shock 70 kDa protein 1-like OS=Rattus norvegicus OX=10116 GN=Hspa1l PE=2 SV=2	0.946357	0.642047
						Inter alpha-trypsin inhibitor, heavy chain 4 OS=Rattus norvegicus OX=10116 GN=Itih4 PE=1 SV=1	0.15056	0.0788339								ATP-dependent 6-phosphofructokinase, platelet type OS=Rattus norvegicus OX=10116 GN=Pfkp PE=1 SV=2	0.954569	0.848706
						Septin OS=Rattus norvegicus OX=10116 GN=Sept3 PE=3 SV=1	0.15056	0.079355								RUN domain-containing 3A OS=Rattus norvegicus OX=10116 GN=Rundc3a PE=1 SV=1	0.997834	0.401967
						C-Jun-amino-terminal kinase-interacting protein 2 OS=Rattus norvegicus OX=10116 GN=Mapk8ip2 PE=1 SV=1	0.15056	0.0809219								Neuroligin-3 OS=Rattus norvegicus OX=10116 GN=Nlgn3 PE=1 SV=1	1.00432	0.229893
						Kinesin-like protein KIF3C OS=Rattus norvegicus OX=10116 GN=Kif3c PE=2 SV=1	0.15056	0.10902								Voltage-gated potassium channel subunit beta-2 OS=Rattus norvegicus OX=10116 GN=Kcnab2 PE=1 SV=1	1.01863	1.1486
						Calcium/calmodulin-dependent protein kinase type II subunit delta OS=Rattus norvegicus OX=10116 GN=Camk2d PE=1 SV=1	0.15056	0.178486								Acylglycerol kinase, mitochondrial OS=Rattus norvegicus OX=10116 GN=Agk PE=1 SV=2	1.02715	1.39032
						LETM1 domain-containing 1 OS=Rattus norvegicus OX=10116 GN=Letmd1 PE=1 SV=1	0.15056	0.211832								ADAM metallopeptidase domain 22 OS=Rattus norvegicus OX=10116 GN=Adam22 PE=1 SV=3	1.04124	0.943828
						Regulating synaptic membrane exocytosis protein 1 OS=Rattus norvegicus OX=10116 GN=Rims1 PE=1 SV=1	0.15056	0.224026								Calcium/calmodulin-dependent protein kinase type II subunit delta OS=Rattus norvegicus OX=10116 GN=Camk2d PE=1 SV=1	1.04893	0.363379
						Formin-like 2 OS=Rattus norvegicus OX=10116 GN=Fmnl2 PE=1 SV=1	0.15056	0.294136								Histone H4 OS=Rattus norvegicus OX=10116 GN=H4c2 PE=1 SV=2	1.06074	0.884447
						Ig-like domain-containing protein OS=Rattus norvegicus OX=10116 PE=1 SV=3	0.15056	0.341989								Complex I-B15 OS=Rattus norvegicus OX=10116 GN=Ndufb4 PE=1 SV=1	1.06281	0.134951
						Tubulin beta-2B chain OS=Rattus norvegicus OX=10116 GN=Tubb2b PE=1 SV=1	0.15056	0.344862								Chromosome segregation 1-like protein OS=Rattus norvegicus OX=10116 GN=Cse1l PE=1 SV=1	1.07382	1.0616
						GTPase NRas OS=Rattus norvegicus OX=10116 GN=Nras PE=1 SV=1	0.15056	0.371611								3-hydroxyacyl-CoA dehydrogenase type-2 OS=Rattus norvegicus OX=10116 GN=Hsd17b10 PE=1 SV=3	1.07519	0.356691
						Dmx-like 2 OS=Rattus norvegicus OX=10116 GN=Dmxl2 PE=1 SV=3	0.15056	0.431798								V-type proton ATPase subunit H OS=Rattus norvegicus OX=10116 GN=Atp6v1h PE=1 SV=1	1.07998	0.684199
						Low molecular weight cytosolic acid phosphatase OS=Rattus norvegicus OX=10116 GN=Acp1 PE=1 SV=2	0.15056	0.444906								MAGUK p55 subfamily member 7 OS=Rattus norvegicus OX=10116 GN=Mpp7 PE=2 SV=2	1.10501	1.06418
						Cyclin-dependent-like kinase 5 OS=Rattus norvegicus OX=10116 GN=Cdk5 PE=1 SV=1	0.15056	0.605548								Histone H2B type 1 OS=Rattus norvegicus OX=10116 PE=1 SV=2	1.1177	0.686405
						Actin-binding LIM protein family, member 3 OS=Rattus norvegicus OX=10116 GN=Ablim3 PE=1 SV=1	0.15056	0.627088								1-phosphatidylinositol 4-kinase OS=Rattus norvegicus OX=10116 GN=Pi4ka PE=1 SV=1	1.13881	0.292235
						Syntaphilin OS=Rattus norvegicus OX=10116 GN=Snph PE=1 SV=1	0.15056	0.643974								Friend virus susceptibility 1 OS=Rattus norvegicus OX=10116 GN=Fv1 PE=4 SV=1	1.15381	0.254579
						Protein-tyrosine-phosphatase OS=Rattus norvegicus OX=10116 GN=Ptprk PE=1 SV=1	0.163499	0.106793								DNA repair protein REV1 OS=Rattus norvegicus OX=10116 GN=Rev1 PE=1 SV=2	1.17441	0.463167
						TNF receptor-associated factor OS=Rattus norvegicus OX=10116 GN=Traf3 PE=3 SV=1	0.163499	0.14691								Heterochromatin protein 1-binding protein 3 OS=Rattus norvegicus OX=10116 GN=Hp1bp3 PE=1 SV=1	1.20163	0.299211
						Neuronal membrane glycoprotein M6-a OS=Rattus norvegicus OX=10116 GN=Gpm6a PE=1 SV=1	0.163499	0.247952								40S ribosomal protein S24 OS=Rattus norvegicus OX=10116 GN=Rps24 PE=3 SV=1	1.21288	0.422012
						Aldo-keto reductase family 1 member A1 OS=Rattus norvegicus OX=10116 GN=Akr1a1 PE=1 SV=2	0.163499	0.248721								Vesicular glutamate transporter 1 OS=Rattus norvegicus OX=10116 GN=Slc17a7 PE=1 SV=1	1.21288	0.16667
						Cysteine desulfurase, mitochondrial OS=Rattus norvegicus OX=10116 GN=Nfs1 PE=1 SV=1	0.163499	0.279841								Alpha-1,4 glucan phosphorylase OS=Rattus norvegicus OX=10116 GN=Pygb PE=1 SV=2	1.23756	0.126264
						Stress-70 protein, mitochondrial OS=Rattus norvegicus OX=10116 GN=Hspa9 PE=1 SV=3	0.163499	0.283997								Calcium uniporter protein OS=Rattus norvegicus OX=10116 GN=Mcu PE=1 SV=1	1.25157	0.291864
						DNA polymerase delta-interacting protein 3 OS=Rattus norvegicus OX=10116 GN=Poldip3 PE=1 SV=1	0.163499	0.294136								Fatty acid-binding protein, brain OS=Rattus norvegicus OX=10116 GN=Fabp7 PE=1 SV=2	1.30159	0.0940628
						Disco-interacting protein 2 homolog A OS=Rattus norvegicus OX=10116 GN=Dip2a PE=1 SV=3	0.163499	0.336299								60S ribosomal protein L23 OS=Rattus norvegicus OX=10116 GN=Rpl23 PE=2 SV=1	1.30334	0.760473
						WD repeat-containing protein 7 OS=Rattus norvegicus OX=10116 GN=Wdr7 PE=1 SV=1	0.163499	0.360514								Elongator complex protein 3 OS=Rattus norvegicus OX=10116 GN=Elp3 PE=1 SV=2	1.34823	0.271679
						AMP deaminase 2 OS=Rattus norvegicus OX=10116 GN=Ampd2 PE=1 SV=2	0.163499	0.41005								Exocyst complex component 2 OS=Rattus norvegicus OX=10116 GN=Exoc2 PE=1 SV=1	1.34823	0.205993
						Tropomodulin-2 OS=Rattus norvegicus OX=10116 GN=Tmod2 PE=1 SV=1	0.163499	0.493495								Catalase OS=Rattus norvegicus OX=10116 GN=Cat PE=1 SV=3	1.38626	0.325119
						ATP-dependent 6-phosphofructokinase OS=Rattus norvegicus OX=10116 GN=Pfkm PE=1 SV=1	0.163499	0.501689								Protein AMBP OS=Rattus norvegicus OX=10116 GN=Ambp PE=1 SV=1	1.39232	0.299211
						14-3-3 protein beta/alpha OS=Rattus norvegicus OX=10116 GN=Ywhab PE=1 SV=3	0.163499	0.605548								Isoleucyl-tRNA synthetase OS=Rattus norvegicus OX=10116 GN=Iars PE=1 SV=2	1.44042	0.18875
						Dihydropyrimidinase-related protein 3 OS=Rattus norvegicus OX=10116 GN=Dpysl3 PE=1 SV=2	0.163499	0.772113								Guanine nucleotide-binding protein G(I)/G(S)/G(T) subunit beta-2 OS=Rattus norvegicus OX=10116 GN=Gnb2 PE=1 SV=4	1.45365	0.55478
						Kinesin-like protein OS=Rattus norvegicus OX=10116 GN=Kif5c PE=1 SV=3	0.176323	0.0423927								NADH dehydrogenase [ubiquinone] 1 alpha subcomplex subunit 10, mitochondrial OS=Rattus norvegicus OX=10116 GN=Ndufa10 PE=1 SV=1	1.4547	0.247107
						Vomeronasal type-1 receptor OS=Rattus norvegicus OX=10116 GN=Vom1r46 PE=3 SV=1	0.176323	0.0840728								Saccharopine dehydrogenase-like oxidoreductase OS=Rattus norvegicus OX=10116 GN=Sccpdh PE=1 SV=1	1.47301	0.437316
						Calcium-activated neutral proteinase small subunit OS=Rattus norvegicus OX=10116 GN=Capns1 PE=1 SV=1	0.176323	0.0952845								Mitochondrial ribosomal protein S12 OS=Rattus norvegicus OX=10116 GN=Mrps12 PE=1 SV=1	1.53456	0.575666
						Glutathione S-transferase Mu 7 OS=Rattus norvegicus OX=10116 GN=Gstm7 PE=1 SV=2	0.176323	0.0979971								Importin 5 OS=Rattus norvegicus OX=10116 GN=Ipo5 PE=1 SV=1	1.58015	0.284018
						S-acyl fatty acid synthase thioesterase, medium chain OS=Rattus norvegicus OX=10116 GN=Olah PE=1 SV=1	0.176323	0.121478								Extracellular sulfatase OS=Rattus norvegicus OX=10116 GN=Sulf2 PE=1 SV=1	1.65901	0.30763
						Non-specific serine/threonine protein kinase OS=Rattus norvegicus OX=10116 GN=Dapk1 PE=1 SV=1	0.176323	0.238824								Adhesion G protein-coupled receptor L1 OS=Rattus norvegicus OX=10116 GN=Adgrl1 PE=1 SV=1	1.7476	0.25138
						Rho guanine nucleotide exchange factor 7 OS=Rattus norvegicus OX=10116 GN=Arhgef7 PE=1 SV=1	0.176323	0.259637								RAS protein activator-like 2 OS=Rattus norvegicus OX=10116 GN=Rasal2 PE=1 SV=1	1.79244	0.196674
						Centrosomal protein of 83 kDa OS=Rattus norvegicus OX=10116 GN=Cep83 PE=2 SV=1	0.176323	0.288193								Cytohesin-3 OS=Rattus norvegicus OX=10116 GN=Cyth3 PE=2 SV=1	1.8492	1.32857
						Arginase-1 OS=Rattus norvegicus OX=10116 GN=Arg1 PE=1 SV=2	0.176323	0.308919								Putative 60S ribosomal protein L37a OS=Rattus norvegicus OX=10116 GN=Rpl37a-ps1 PE=5 SV=2	1.87184	0.182344
						Chaperonin containing Tcp1, subunit 6A (Zeta 1) OS=Rattus norvegicus OX=10116 GN=Cct6a PE=1 SV=1	0.176323	0.320572								NADH-ubiquinone oxidoreductase 75 kDa subunit, mitochondrial OS=Rattus norvegicus OX=10116 GN=Ndufs1 PE=1 SV=1	2.02857	0.573984
						Mitochondrial import inner membrane translocase subunit TIM44 OS=Rattus norvegicus OX=10116 GN=Timm44 PE=1 SV=1	0.176323	0.324222								60S ribosomal protein L27a OS=Rattus norvegicus OX=10116 GN=RGD1562402 PE=3 SV=1	2.0861	0.370285
						Excitatory amino acid transporter 2 OS=Rattus norvegicus OX=10116 GN=Slc1a2 PE=1 SV=2	0.176323	0.41005								Citrate synthase, mitochondrial OS=Rattus norvegicus OX=10116 GN=Cs PE=1 SV=1	2.09119	0.426992
						Non-specific serine/threonine protein kinase OS=Rattus norvegicus OX=10116 GN=Mast3 PE=1 SV=1	0.176323	0.41005								Cytochrome b-c1 complex subunit 1, mitochondrial OS=Rattus norvegicus OX=10116 GN=Uqcrc1 PE=1 SV=1	2.37601	0.213572
						14-3-3 protein gamma OS=Rattus norvegicus OX=10116 GN=Ywhag PE=1 SV=2	0.176323	0.534617								Vesicle-associated membrane protein-associated protein A OS=Rattus norvegicus OX=10116 GN=Vapa PE=1 SV=3	2.44201	1.39032
						RAB10, member RAS oncogene family OS=Rattus norvegicus OX=10116 GN=Rab10 PE=1 SV=1	0.176323	0.560667								Cytochrome b-c1 complex subunit 8 OS=Rattus norvegicus OX=10116 GN=Uqcrq PE=3 SV=1	2.70022	0.306501
						Protein bassoon OS=Rattus norvegicus OX=10116 GN=Bsn PE=4 SV=1	0.176323	0.585027								DnaJ heat shock protein family (Hsp40) member A3 OS=Rattus norvegicus OX=10116 GN=Dnaja3 PE=1 SV=2	2.78325	0.306236
						Lysine--tRNA ligase OS=Rattus norvegicus OX=10116 GN=Kars1 PE=1 SV=1	0.189034	0.0227338								Histone H3.3 OS=Rattus norvegicus OX=10116 GN=H3-3b PE=1 SV=2	3.00684	1.12968
						Adenosylhomocysteinase OS=Rattus norvegicus OX=10116 GN=Ahcy PE=1 SV=3	0.189034	0.0788339								39S ribosomal protein L14, mitochondrial OS=Rattus norvegicus OX=10116 GN=Mrpl14 PE=1 SV=2	3.1162	0.686405
						Extracellular sulfatase OS=Rattus norvegicus OX=10116 GN=Sulf2 PE=1 SV=1	0.189034	0.151811								40S ribosomal protein S27 OS=Rattus norvegicus OX=10116 GN=Rps27 PE=1 SV=3	3.29249	0.760473
						Cytoplasmic linker-associated protein 1 OS=Rattus norvegicus OX=10116 GN=Clasp1 PE=1 SV=1	0.189034	0.270835								V-type proton ATPase subunit B, brain isoform OS=Rattus norvegicus OX=10116 GN=Atp6v1b2 PE=1 SV=1	3.89414	0.829216
						Protein ERGIC-53 OS=Rattus norvegicus OX=10116 GN=Lman1 PE=1 SV=1	0.189034	0.29073								RCG61099, isoform CRA_b OS=Rattus norvegicus OX=10116 GN=Srsf3 PE=1 SV=1	5.08793	0.884447
						Ig-like domain-containing protein OS=Rattus norvegicus OX=10116 PE=1 SV=1	0.189034	0.331614								Serine/arginine-rich splicing factor 1 OS=Rattus norvegicus OX=10116 GN=Srsf1 PE=1 SV=1	8.28132	0.363379
						Importin 7 OS=Rattus norvegicus OX=10116 GN=Ipo7 PE=1 SV=1	0.189034	0.335358								Xph20	8.42877	1.3245
						RAB9B, member RAS oncogene family OS=Rattus norvegicus OX=10116 GN=Rab9b PE=3 SV=1	0.189034	0.435334
						Arf-GAP with GTPase, ANK repeat and PH domain-containing protein 2 OS=Rattus norvegicus OX=10116 GN=Agap2 PE=1 SV=1	0.189034	0.66354
						Alanine--tRNA ligase, cytoplasmic OS=Rattus norvegicus OX=10116 GN=Aars1 PE=1 SV=3	0.189034	0.739929
						Ig gamma-2A chain C region OS=Rattus norvegicus OX=10116 GN=Igg-2a PE=1 SV=1	0.189034	1.28735
						39S ribosomal protein L14, mitochondrial OS=Rattus norvegicus OX=10116 GN=Mrpl14 PE=1 SV=2	0.201634	0.0168249
						ADP-ribosylation factor-like protein 8B OS=Rattus norvegicus OX=10116 GN=Arl8b PE=2 SV=1	0.201634	0.139662
						Peptidyl-prolyl cis-trans isomerase D OS=Rattus norvegicus OX=10116 GN=Ppid PE=1 SV=3	0.201634	0.226214
						Phenylalanyl-tRNA synthetase beta subunit OS=Rattus norvegicus OX=10116 GN=Farsb PE=1 SV=1	0.201634	0.286509
						IGv domain-containing protein OS=Rattus norvegicus OX=10116 PE=4 SV=1	0.201634	0.313364
						Filaggrin family member 2 OS=Rattus norvegicus OX=10116 GN=Flg2 PE=4 SV=1	0.201634	0.343902
						Centrosomal protein 170 OS=Rattus norvegicus OX=10116 GN=LOC100909664 PE=1 SV=2	0.201634	0.380907
						Mitochondrial glutamate carrier 1-like OS=Rattus norvegicus OX=10116 GN=LOC100911440 PE=1 SV=1	0.201634	0.435334
						Phosphoglycerate kinase 1 OS=Rattus norvegicus OX=10116 GN=Pgk1 PE=1 SV=2	0.201634	0.455932
						Centrosomal protein of 162 kDa OS=Rattus norvegicus OX=10116 GN=Cep162 PE=1 SV=2	0.201634	0.540608
						Citrate synthase, mitochondrial OS=Rattus norvegicus OX=10116 GN=Cs PE=1 SV=1	0.201634	0.681937
						Similar to 4933427D14Rik protein OS=Rattus norvegicus OX=10116 GN=RGD1304728 PE=1 SV=1	0.201634	0.826814
						Dihydropyrimidinase-related protein 1 OS=Rattus norvegicus OX=10116 GN=Crmp1 PE=1 SV=1	0.201634	0.876148
						Neuron navigator 1 OS=Rattus norvegicus OX=10116 GN=Nav1 PE=1 SV=3	0.201634	0.899629
						Guanine nucleotide-binding protein G(o) subunit alpha OS=Rattus norvegicus OX=10116 GN=Gnao1 PE=1 SV=2	0.201634	0.931814
						Apical junction component 1 homolog OS=Rattus norvegicus OX=10116 GN=Ajm1 PE=1 SV=3	0.214125	0.0560111
						Proteasome (Prosome, macropain) 26S subunit, non-ATPase, 12 OS=Rattus norvegicus OX=10116 GN=Psmd12 PE=1 SV=1	0.214125	0.0846002
						Mitochondrial import inner membrane translocase subunit TIM50 OS=Rattus norvegicus OX=10116 GN=Timm50 PE=1 SV=2	0.214125	0.10902
						Aconitate hydratase, mitochondrial OS=Rattus norvegicus OX=10116 GN=Aco2 PE=1 SV=2	0.214125	0.153045
						Proteasome subunit alpha type-2 OS=Rattus norvegicus OX=10116 GN=Psma2 PE=1 SV=3	0.214125	0.253366
						Golgi apparatus protein 1 OS=Rattus norvegicus OX=10116 GN=Glg1 PE=1 SV=1	0.214125	0.294136
						Guanine nucleotide-binding protein G(I)/G(S)/G(T) subunit beta-1 OS=Rattus norvegicus OX=10116 GN=Gnb1 PE=1 SV=4	0.214125	0.308035
						Dolichyl-diphosphooligosaccharide--protein glycosyltransferase subunit 2 OS=Rattus norvegicus OX=10116 GN=Rpn2 PE=2 SV=2	0.214125	0.452225
						CCT-theta OS=Rattus norvegicus OX=10116 GN=Cct8 PE=1 SV=1	0.214125	0.50307
						Coronin OS=Rattus norvegicus OX=10116 GN=Coro1b PE=1 SV=1	0.214125	0.534617
						Amphiphysin-like OS=Rattus norvegicus OX=10116 GN=LOC100910792 PE=1 SV=1	0.214125	0.917215
						Calcium/calmodulin-dependent protein kinase OS=Rattus norvegicus OX=10116 GN=Camk2b PE=1 SV=2	0.214125	1.1986
						Calretinin OS=Rattus norvegicus OX=10116 GN=Calb2 PE=1 SV=1	0.226509	0.142668
						General vesicular transport factor p115 OS=Rattus norvegicus OX=10116 GN=Uso1 PE=1 SV=1	0.226509	0.163043
						G protein pathway suppressor 2 (Predicted) OS=Rattus norvegicus OX=10116 GN=Neurl4 PE=1 SV=2	0.226509	0.172631
						Carboxypeptidase N catalytic chain OS=Rattus norvegicus OX=10116 GN=Cpn1 PE=2 SV=1	0.226509	0.218963
						Gephyrin OS=Rattus norvegicus OX=10116 GN=Gphn PE=1 SV=3	0.226509	0.341989
						Vesicle-fusing ATPase OS=Rattus norvegicus OX=10116 GN=Nsf PE=1 SV=1	0.226509	0.876148
						Misshapen-like kinase 1 OS=Rattus norvegicus OX=10116 GN=Mink1 PE=1 SV=1	0.226509	0.896196
						EF-hand domain family, member D1 OS=Rattus norvegicus OX=10116 GN=Efhd1 PE=4 SV=1	0.238787	0.166216
						Isocitrate dehydrogenase [NADP] cytoplasmic OS=Rattus norvegicus OX=10116 GN=Idh1 PE=1 SV=1	0.238787	0.189767
						Tubulin-glutamate carboxypeptidase OS=Rattus norvegicus OX=10116 GN=Agtpbp1 PE=3 SV=1	0.238787	0.216096
						Exocyst complex component 5 OS=Rattus norvegicus OX=10116 GN=Exoc5 PE=1 SV=1	0.238787	0.217527
						Protein tweety homolog OS=Rattus norvegicus OX=10116 GN=Ttyh3 PE=1 SV=1	0.238787	0.344862
						Synaptotagmin-7 OS=Rattus norvegicus OX=10116 GN=Syt7 PE=1 SV=1	0.238787	0.525784
						Protein rogdi homolog OS=Rattus norvegicus OX=10116 GN=Rogdi PE=1 SV=1	0.238787	0.812479
						Inter-alpha-trypsin inhibitor heavy chain 2 OS=Rattus norvegicus OX=10116 GN=Itih2 PE=1 SV=3	0.238787	0.869666
						26S proteasome AAA-ATPase subunit RPT1 OS=Rattus norvegicus OX=10116 GN=Psmc2 PE=1 SV=1	0.250962	0.0899095
						ADP-ribosylation factor-like GTPase 8A OS=Rattus norvegicus OX=10116 GN=Arl8a PE=1 SV=1	0.250962	0.178486
						RCG21137 OS=Rattus norvegicus OX=10116 GN=Pgam5 PE=1 SV=1	0.250962	0.540608
						Adaptor-related protein complex 3 subunit sigma 2 OS=Rattus norvegicus OX=10116 GN=Ap3s2 PE=1 SV=1	0.250962	0.540608
						Vomeronasal 2 receptor, 53 OS=Rattus norvegicus OX=10116 GN=Vom2r53 PE=4 SV=1	0.250962	0.58838
						Rho guanine nucleotide exchange factor 2 OS=Rattus norvegicus OX=10116 GN=Arhgef2 PE=1 SV=1	0.250962	0.681937
						Exportin-1 OS=Rattus norvegicus OX=10116 GN=Xpo1 PE=1 SV=1	0.263034	0.0181814
						RNA helicase OS=Rattus norvegicus OX=10116 GN=Ddx3x PE=1 SV=1	0.263034	0.0362122
						ITI_HC_C domain-containing protein OS=Rattus norvegicus OX=10116 PE=4 SV=2	0.263034	0.047692
						Eukaryotic translation initiation factor 2 subunit 3, X-linked OS=Rattus norvegicus OX=10116 GN=Eif2s3 PE=1 SV=2	0.263034	0.0899095
						Lon protease homolog, mitochondrial OS=Rattus norvegicus OX=10116 GN=Lonp1 PE=2 SV=1	0.263034	0.286509
						Sacsin molecular chaperone OS=Rattus norvegicus OX=10116 GN=Sacs PE=1 SV=2	0.263034	0.331614
						Calcium-transporting ATPase OS=Rattus norvegicus OX=10116 GN=Atp2b2 PE=1 SV=3	0.263034	0.555955
						26S proteasome non-ATPase regulatory subunit 11 OS=Rattus norvegicus OX=10116 GN=Psmd11 PE=1 SV=2	0.263034	0.625252
						Calcium/calmodulin-dependent protein kinase type II subunit gamma OS=Rattus norvegicus OX=10116 GN=Camk2g PE=1 SV=1	0.263034	0.737549
						Synapsin-1 OS=Rattus norvegicus OX=10116 GN=Syn1 PE=1 SV=3	0.263034	0.752027
						Caskin-1 OS=Rattus norvegicus OX=10116 GN=Caskin1 PE=1 SV=2	0.263034	0.847712
						Calmodulin-3 OS=Rattus norvegicus OX=10116 GN=Calm3 PE=1 SV=1	0.275007	0.0757207
						TBC1 domain family member 31 OS=Rattus norvegicus OX=10116 GN=Tbc1d31 PE=1 SV=1	0.275007	0.076238
						Eukaryotic translation initiation factor 6 OS=Rattus norvegicus OX=10116 GN=Eif6 PE=1 SV=1	0.275007	0.0974532
						Phenylalanine--tRNA ligase alpha subunit OS=Rattus norvegicus OX=10116 GN=Farsa PE=1 SV=1	0.275007	0.121478
						Prickle planar cell polarity protein 2 OS=Rattus norvegicus OX=10116 GN=Prickle2 PE=1 SV=2	0.275007	0.238824
						CaM kinase-like vesicle-associated protein OS=Rattus norvegicus OX=10116 GN=Camkv PE=1 SV=1	0.275007	0.417937
						Copine 6 OS=Rattus norvegicus OX=10116 GN=Cpne6 PE=1 SV=2	0.275007	0.607303
						COP9 signalosome complex subunit 3 OS=Rattus norvegicus OX=10116 GN=Cops3 PE=1 SV=1	0.275007	0.876148
						Similar to alpha-fetoprotein OS=Rattus norvegicus OX=10116 GN=LOC360919 PE=1 SV=1	0.275007	0.876148
						Nuclear FMR1-interacting protein 2 OS=Rattus norvegicus OX=10116 GN=Nufip2 PE=1 SV=2	0.286881	0.126679
						Alpha-2-macroglobulin OS=Rattus norvegicus OX=10116 GN=A2m PE=2 SV=2	0.286881	0.355561
						Programmed cell death protein 6 OS=Rattus norvegicus OX=10116 GN=Pdcd6 PE=2 SV=1	0.286881	0.365523
						Ig-like domain-containing protein OS=Rattus norvegicus OX=10116 PE=4 SV=3	0.286881	0.534617
						Ezrin OS=Rattus norvegicus OX=10116 GN=Ezr PE=1 SV=3	0.286881	0.536107
						Albumin OS=Rattus norvegicus OX=10116 GN=Alb PE=1 SV=1	0.286881	0.543634
						Peripheral plasma membrane protein CASK OS=Rattus norvegicus OX=10116 GN=LOC100910506 PE=1 SV=1	0.286881	0.66354
						Isocitrate dehydrogenase [NAD] subunit alpha, mitochondrial OS=Rattus norvegicus OX=10116 GN=Idh3a PE=1 SV=1	0.286881	0.709965
						Vacuolar protein sorting-associated protein 35 OS=Rattus norvegicus OX=10116 GN=Vps35 PE=1 SV=1	0.286881	0.785156
						Peroxiredoxin-2 OS=Rattus norvegicus OX=10116 GN=Prdx2 PE=1 SV=1	0.298658	0.224026
						Leucine-rich PPR motif-containing protein, mitochondrial OS=Rattus norvegicus OX=10116 GN=Lrpprc PE=1 SV=2	0.298658	0.341989
						Protein phosphatase 1E OS=Rattus norvegicus OX=10116 GN=Ppm1e PE=1 SV=1	0.298658	0.441291
						Cofilin 2 OS=Rattus norvegicus OX=10116 GN=Cfl2 PE=1 SV=1	0.298658	0.455932
						Phosphofurin acidic cluster sorting protein 1 OS=Rattus norvegicus OX=10116 GN=Pacs1 PE=1 SV=1	0.298658	0.573489
						Sideroflexin-3 OS=Rattus norvegicus OX=10116 GN=Sfxn3 PE=2 SV=1	0.298658	0.575118
						Tubulin beta-2A chain OS=Rattus norvegicus OX=10116 GN=Tubb2a PE=1 SV=1	0.298658	1.09854
						Developmentally-regulated GTP-binding protein 2 OS=Rattus norvegicus OX=10116 GN=Drg2 PE=1 SV=1	0.31034	0.0181814
						Serine (Or cysteine) proteinase inhibitor, clade B, member 7 OS=Rattus norvegicus OX=10116 GN=Serpinb7 PE=3 SV=1	0.31034	0.0282604
						Complex I-30kD OS=Rattus norvegicus OX=10116 GN=Ndufs3 PE=1 SV=1	0.31034	0.25649
						Sperm antigen with calponin homology and coiled-coil domains 1 OS=Rattus norvegicus OX=10116 GN=Specc1 PE=1 SV=1	0.31034	0.272459
						Acylglycerol kinase, mitochondrial OS=Rattus norvegicus OX=10116 GN=Agk PE=1 SV=2	0.31034	0.416801
						Acyl-CoA thioesterase 7, isoform CRA_a OS=Rattus norvegicus OX=10116 GN=Acot7 PE=1 SV=2	0.31034	0.492144
						Serine/arginine-rich splicing factor 2 OS=Rattus norvegicus OX=10116 GN=Srsf2 PE=1 SV=3	0.31034	0.555955
						SH3-containing GRB2-like protein 3-interacting protein 1 OS=Rattus norvegicus OX=10116 GN=Sgip1 PE=1 SV=1	0.31034	0.60206
						Dynactin subunit 1 OS=Rattus norvegicus OX=10116 GN=Dctn1 PE=1 SV=2	0.31034	0.661544
						Tropomyosin alpha-3 chain OS=Rattus norvegicus OX=10116 GN=Tpm3 PE=1 SV=2	0.31034	0.79588
						Elongation factor Tu, mitochondrial OS=Rattus norvegicus OX=10116 GN=Tufm PE=1 SV=1	0.31034	1.284
						Cytoplasmic polyadenylation element-binding protein 4 OS=Rattus norvegicus OX=10116 GN=Cpeb4 PE=1 SV=1	0.321928	0.315155
						Protein unc-13 homolog A OS=Rattus norvegicus OX=10116 GN=Unc13a PE=1 SV=3	0.321928	0.331614
						Glycogen synthase kinase-3 alpha OS=Rattus norvegicus OX=10116 GN=Gsk3a PE=1 SV=1	0.321928	0.340084
						Carbonic anhydrase 2 OS=Rattus norvegicus OX=10116 GN=Ca2 PE=1 SV=2	0.321928	0.417937
						Hephaestin OS=Rattus norvegicus OX=10116 GN=Heph PE=1 SV=1	0.321928	0.844664
						Peroxiredoxin-6 OS=Rattus norvegicus OX=10116 GN=Prdx6 PE=1 SV=3	0.333424	0.0545314
						Adenine phosphoribosyltransferase OS=Rattus norvegicus OX=10116 GN=Aprt PE=1 SV=1	0.333424	0.0979971
						SRSF protein kinase 1 OS=Rattus norvegicus OX=10116 GN=Srpk1 PE=1 SV=3	0.333424	0.224026
						Tropomyosin 1, alpha, isoform CRA_p OS=Rattus norvegicus OX=10116 GN=Tpm1 PE=1 SV=1	0.333424	0.263603
						Ras-related protein Rap-2b OS=Rattus norvegicus OX=10116 GN=Rap2b PE=2 SV=1	0.333424	0.696804
						Regulatory-associated protein of MTOR, complex 1 OS=Rattus norvegicus OX=10116 GN=Rptor PE=1 SV=2	0.333424	0.705534
						Cytochrome b-c1 complex subunit 1, mitochondrial OS=Rattus norvegicus OX=10116 GN=Uqcrc1 PE=1 SV=1	0.344828	0.0433514
						26S proteasome non-ATPase regulatory subunit 8 OS=Rattus norvegicus OX=10116 GN=Psmd8 PE=1 SV=1	0.344828	0.133713
						Serine racemase OS=Rattus norvegicus OX=10116 GN=Srr PE=1 SV=1	0.344828	0.227678
						RAS protein activator-like 2 OS=Rattus norvegicus OX=10116 GN=Rasal2 PE=1 SV=1	0.344828	0.388277
						Protein NDRG3 OS=Rattus norvegicus OX=10116 GN=Ndrg3 PE=1 SV=1	0.344828	0.44855
						Meiosis regulator for oocyte development OS=Rattus norvegicus OX=10116 GN=Mios PE=1 SV=1	0.344828	0.876148
						Tubulin beta chain OS=Rattus norvegicus OX=10116 GN=Tubb4b PE=1 SV=2	0.344828	0.970616
						26S proteasome regulatory subunit 6A OS=Rattus norvegicus OX=10116 GN=Psmc3 PE=1 SV=1	0.344828	1.00393
						Low-density lipoprotein receptor-related protein 2 OS=Rattus norvegicus OX=10116 GN=Lrp2 PE=1 SV=1	0.356144	0.02365
						Translationally-controlled tumor protein OS=Rattus norvegicus OX=10116 GN=Tpt1 PE=1 SV=1	0.356144	0.090444
						Ras-related protein Rab-1A OS=Rattus norvegicus OX=10116 GN=Rab1A PE=1 SV=3	0.356144	0.195179
						Glutaminase OS=Rattus norvegicus OX=10116 GN=Gls PE=1 SV=1	0.356144	0.29243
						Nuclear distribution protein nudE-like 1 OS=Rattus norvegicus OX=10116 GN=Ndel1 PE=1 SV=1	0.356144	0.357535
						Similar to RIKEN cDNA 1110063G11 (Predicted) OS=Rattus norvegicus OX=10116 GN=Tmcc2 PE=1 SV=1	0.356144	0.41005
						CD101 molecule OS=Rattus norvegicus OX=10116 GN=Cd101 PE=4 SV=2	0.356144	0.434152
						cAMP-dependent protein kinase catalytic subunit alpha OS=Rattus norvegicus OX=10116 GN=Prkaca PE=1 SV=2	0.356144	0.595166
						Hexokinase-1 OS=Rattus norvegicus OX=10116 GN=Hk1 PE=1 SV=4	0.356144	1.27737
						Desmoglein 1 OS=Rattus norvegicus OX=10116 GN=Dsg1 PE=4 SV=3	0.367371	0.02365
						Leucine-rich repeat flightless-interacting protein 1 OS=Rattus norvegicus OX=10116 GN=Lrrfip1 PE=1 SV=1	0.367371	0.19044
						C-Jun-amino-terminal kinase-interacting protein 3 OS=Rattus norvegicus OX=10116 GN=Mapk8ip3 PE=1 SV=2	0.367371	0.536107
						Beta-soluble NSF attachment protein OS=Rattus norvegicus OX=10116 GN=Napb PE=1 SV=1	0.367371	0.643974
						HP domain-containing protein OS=Rattus norvegicus OX=10116 PE=1 SV=1	0.367371	0.785156
						HECT-type E3 ubiquitin transferase OS=Rattus norvegicus OX=10116 GN=Herc2 PE=1 SV=1	0.367371	0.896196
						Actin-related protein 2/3 complex subunit 5-like protein OS=Rattus norvegicus OX=10116 GN=Arpc5l PE=1 SV=2	0.367371	0.906578
						Erythrocyte membrane protein band 4.1-like 2 OS=Rattus norvegicus OX=10116 GN=Epb41l2 PE=1 SV=3	0.367371	0.954677
						Cytospin-A OS=Rattus norvegicus OX=10116 GN=Specc1l PE=1 SV=1	0.367371	0.995679
						Numb-like protein OS=Rattus norvegicus OX=10116 GN=Numbl PE=1 SV=1	0.378512	0.0840728
						EPM2A-interacting protein 1 OS=Rattus norvegicus OX=10116 GN=Epm2aip1 PE=1 SV=3	0.378512	0.0883098
						Keratin, type II cytoskeletal 5 OS=Rattus norvegicus OX=10116 GN=Krt5 PE=1 SV=1	0.378512	0.0899095
						Peroxiredoxin 3 OS=Rattus norvegicus OX=10116 GN=Prdx3 PE=1 SV=1	0.378512	0.173277
						Microtubule-associated protein 1S OS=Rattus norvegicus OX=10116 GN=Map1s PE=1 SV=1	0.378512	0.196543
						Pleckstrin homology domain-containing A5 OS=Rattus norvegicus OX=10116 GN=Plekha5 PE=1 SV=2	0.378512	0.20621
						RCG61762, isoform CRA_d OS=Rattus norvegicus OX=10116 GN=Srsf7 PE=1 SV=1	0.378512	0.325139
						Trypsin V-A OS=Rattus norvegicus OX=10116 PE=2 SV=1	0.378512	0.347754
						Synaptic vesicle glycoprotein 2A OS=Rattus norvegicus OX=10116 GN=Sv2a PE=1 SV=2	0.378512	0.401209
						Alpha N-catenin OS=Rattus norvegicus OX=10116 PE=1 SV=1	0.378512	0.455932
						Dynactin subunit 2 OS=Rattus norvegicus OX=10116 GN=Dctn2 PE=1 SV=1	0.378512	0.565431
						V-type proton ATPase subunit C 1 OS=Rattus norvegicus OX=10116 GN=Atp6v1c1 PE=1 SV=1	0.378512	0.896196
						Spire homolog 1 (Drosophila) (Predicted), isoform CRA_b OS=Rattus norvegicus OX=10116 GN=Spire1 PE=1 SV=1	0.378512	1.14267
						Gamma-aminobutyric acid receptor subunit gamma-2 OS=Rattus norvegicus OX=10116 GN=Gabrg2 PE=1 SV=1	0.389567	0.0127808
						DnaJ (Hsp40) homolog, subfamily C, member 6 (Predicted) OS=Rattus norvegicus OX=10116 GN=Dnajc6 PE=1 SV=1	0.389567	0.104025
						Protein lin-7 homolog OS=Rattus norvegicus OX=10116 GN=Lin7a PE=1 SV=2	0.389567	0.19044
						Uncharacterized protein OS=Rattus norvegicus OX=10116 PE=1 SV=3	0.389567	0.530178
						Pyruvate dehydrogenase E1 component subunit beta, mitochondrial OS=Rattus norvegicus OX=10116 GN=Pdhb PE=1 SV=2	0.389567	0.571865
						PR/SET domain 16 OS=Rattus norvegicus OX=10116 GN=Prdm16 PE=4 SV=1	0.389567	0.575118
						V-type proton ATPase subunit B, brain isoform OS=Rattus norvegicus OX=10116 GN=Atp6v1b2 PE=1 SV=1	0.389567	0.595166
						2-oxoglutarate dehydrogenase, mitochondrial OS=Rattus norvegicus OX=10116 GN=Ogdh PE=1 SV=1	0.389567	0.821023
						Fructose-bisphosphate aldolase A OS=Rattus norvegicus OX=10116 GN=Aldoa PE=1 SV=2	0.389567	0.835647
						Acetyl-CoA acetyltransferase, mitochondrial OS=Rattus norvegicus OX=10116 GN=Acat1 PE=1 SV=1	0.389567	0.954677
						Biliverdin reductase A OS=Rattus norvegicus OX=10116 GN=Blvra PE=1 SV=1	0.400538	0.41005
						Sorting nexin 4 OS=Rattus norvegicus OX=10116 GN=Snx4 PE=1 SV=1	0.400538	0.525784
						Splicing factor U2AF subunit OS=Rattus norvegicus OX=10116 GN=U2af2 PE=1 SV=2	0.400538	0.562249
						Cleavage and polyadenylation specificity factor subunit 6 OS=Rattus norvegicus OX=10116 GN=Cpsf6 PE=1 SV=2	0.400538	0.66354
						Heparin cofactor 2 OS=Rattus norvegicus OX=10116 GN=Serpind1 PE=1 SV=1	0.400538	0.818156
						Centrosomal protein 170B OS=Rattus norvegicus OX=10116 GN=Cep170b PE=1 SV=1	0.400538	0.838632
						Keratin 16 OS=Rattus norvegicus OX=10116 GN=Krt16 PE=1 SV=1	0.411426	0.0721166
						Keratin, type II cytoskeletal 6A OS=Rattus norvegicus OX=10116 GN=Krt6a PE=1 SV=1	0.411426	0.10902
						RAP1, GTP-GDP dissociation stimulator 1 (Predicted), isoform CRA_b OS=Rattus norvegicus OX=10116 GN=Rap1gds1 PE=1 SV=2	0.411426	0.216096
						Thioredoxin OS=Rattus norvegicus OX=10116 GN=Txn1 PE=1 SV=1	0.411426	0.324222
						Sorbin and SH3 domain-containing protein 2 OS=Rattus norvegicus OX=10116 GN=Sorbs2 PE=1 SV=2	0.411426	0.562249
						Elongator complex protein 1 OS=Rattus norvegicus OX=10116 GN=Elp1 PE=2 SV=1	0.411426	0.562249
						Neurabin-1 OS=Rattus norvegicus OX=10116 GN=Ppp1r9a PE=1 SV=1	0.411426	0.563837
						Phosphatidylinositol transfer protein, membrane-associated 2 OS=Rattus norvegicus OX=10116 GN=Pitpnm2 PE=1 SV=2	0.411426	0.605548
						Cleavage and polyadenylation specificity factor subunit 5 OS=Rattus norvegicus OX=10116 GN=Nudt21 PE=2 SV=1	0.411426	0.946922
						Protein phosphatase 1 regulatory subunit OS=Rattus norvegicus OX=10116 GN=Ppp1r12b PE=1 SV=1	0.411426	0.954677
						Serine/threonine-protein phosphatase PP1-beta catalytic subunit OS=Rattus norvegicus OX=10116 GN=Ppp1cb PE=1 SV=3	0.411426	1.284
						Peroxiredoxin-4 OS=Rattus norvegicus OX=10116 GN=Prdx4 PE=2 SV=1	0.422233	0.0560111
						Poly(rC)-binding protein 4 OS=Rattus norvegicus OX=10116 GN=Pcbp4 PE=4 SV=1	0.422233	0.120331
						Tubulin beta-3 chain OS=Rattus norvegicus OX=10116 GN=Tubb3 PE=1 SV=1	0.422233	1.21968
						Tubulin alpha-1C chain OS=Rattus norvegicus OX=10116 GN=Tuba1c PE=1 SV=1	0.422233	1.21968
						Keratin, type II cytoskeletal 8 OS=Rattus norvegicus OX=10116 GN=Krt8 PE=1 SV=3	0.432959	0.0974532
						Aminopeptidase OS=Rattus norvegicus OX=10116 GN=Npepps PE=1 SV=1	0.432959	0.178486
						SH3 domain-binding glutamic acid-rich-like protein OS=Rattus norvegicus OX=10116 GN=Sh3bgrl2 PE=1 SV=1	0.432959	0.19382
						DnaJ heat shock protein family (Hsp40) member A3 OS=Rattus norvegicus OX=10116 GN=Dnaja3 PE=1 SV=2	0.432959	0.270835
						Cullin-associated NEDD8-dissociated protein 1 OS=Rattus norvegicus OX=10116 GN=Cand1 PE=1 SV=1	0.432959	0.60206
						GABA(A) receptor subunit alpha-2 OS=Rattus norvegicus OX=10116 GN=Gabra2 PE=3 SV=3	0.432959	0.643974
						Trafficking protein particle complex subunit OS=Rattus norvegicus OX=10116 GN=Trappc4 PE=1 SV=1	0.443607	0.29243
						Leucine-rich glioma-inactivated protein 1 OS=Rattus norvegicus OX=10116 GN=Lgi1 PE=1 SV=1	0.443607	0.324222
						Plakophilin 4 OS=Rattus norvegicus OX=10116 GN=Pkp4 PE=1 SV=2	0.443607	0.500313
						RNA helicase OS=Rattus norvegicus OX=10116 GN=Eif4a1 PE=1 SV=1	0.454176	0.379864
						Tubulin alpha-1A chain OS=Rattus norvegicus OX=10116 GN=Tuba1a PE=1 SV=1	0.454176	0.835647
						Splicing factor 3b, subunit 1 OS=Rattus norvegicus OX=10116 GN=Sf3b1 PE=1 SV=1	0.454176	0.847712
						RUN domain-containing 3A OS=Rattus norvegicus OX=10116 GN=Rundc3a PE=1 SV=1	0.464668	0.0835461
						Neuropilin-2 OS=Rattus norvegicus OX=10116 GN=Nrp2 PE=2 SV=1	0.464668	0.131944
						Intraflagellar transport protein 56 OS=Rattus norvegicus OX=10116 GN=Ttc26 PE=2 SV=1	0.464668	0.163043
						Isocitrate dehydrogenase [NAD] subunit, mitochondrial OS=Rattus norvegicus OX=10116 GN=Idh3g PE=1 SV=1	0.464668	1.284
						Keratin, type II cytoskeletal 72 OS=Rattus norvegicus OX=10116 GN=Krt72 PE=3 SV=1	0.475085	0.0899095
						Ras-related protein Rab-35 OS=Rattus norvegicus OX=10116 GN=Rab35 PE=1 SV=1	0.485427	0.0721166
						Ras homolog family member T1 OS=Rattus norvegicus OX=10116 GN=Rhot1 PE=1 SV=1	0.485427	0.238824
						Membrane palmitoylated protein 6 OS=Rattus norvegicus OX=10116 GN=Mpp6 PE=1 SV=1	0.485427	0.271646
						Transgelin OS=Rattus norvegicus OX=10116 GN=Tagln3 PE=1 SV=1	0.485427	0.349692
						Ras-related protein Rab-3C OS=Rattus norvegicus OX=10116 GN=Rab3c PE=1 SV=1	0.485427	0.444906
						Syndecan-4 OS=Rattus norvegicus OX=10116 GN=Sdc4 PE=1 SV=1	0.485427	0.681937
						Proteasome 26S subunit, ATPase 6 OS=Rattus norvegicus OX=10116 GN=Psmc6 PE=1 SV=1	0.485427	0.882729
						Synaptotagmin-1 OS=Rattus norvegicus OX=10116 GN=Syt1 PE=1 SV=3	0.485427	1.28316
						Histone H3 OS=Rattus norvegicus OX=10116 GN=Hist2h3c2 PE=1 SV=1	0.495695	0.0282604
						Eukaryotic translation initiation factor 3 subunit C OS=Rattus norvegicus OX=10116 GN=Eif3c PE=1 SV=1	0.495695	0.298432
						Carboxylic ester hydrolase OS=Rattus norvegicus OX=10116 GN=Ces1a PE=1 SV=1	0.495695	0.471083
						Liprin-alpha-4 OS=Rattus norvegicus OX=10116 GN=Ppfia4 PE=1 SV=3	0.495695	0.686133
						Glyceraldehyde-3-phosphate dehydrogenase OS=Rattus norvegicus OX=10116 GN=Gapdh PE=1 SV=3	0.495695	1.35164
						Glutamate dehydrogenase 1, mitochondrial OS=Rattus norvegicus OX=10116 GN=Glud1 PE=1 SV=2	0.505891	0.00833099
						Actin-related protein 2/3 complex subunit 2 OS=Rattus norvegicus OX=10116 GN=Arpc2 PE=1 SV=1	0.505891	0.844664
						Chromodomain-helicase-DNA-binding protein 8 OS=Rattus norvegicus OX=10116 GN=Chd8 PE=1 SV=2	0.516015	0.444906
						K(+) channel subunit beta-2 OS=Rattus norvegicus OX=10116 GN=Kcnab2 PE=1 SV=1	0.516015	0.539102
						ARP10 actin-related protein 10 homolog (S. cerevisiae) OS=Rattus norvegicus OX=10116 GN=Actr10 PE=1 SV=1	0.516015	0.688246
						RCG53723 OS=Rattus norvegicus OX=10116 GN=LOC690483 PE=4 SV=3	0.526069	0.66354
						H(+)-transporting two-sector ATPase OS=Rattus norvegicus OX=10116 GN=Atp6v1a PE=1 SV=1	0.526069	0.860121
						Trypsin X5 OS=Rattus norvegicus OX=10116 GN=Tryx5 PE=2 SV=1	0.536053	0.00656377
						Insulin receptor-related protein OS=Rattus norvegicus OX=10116 GN=Insrr PE=1 SV=3	0.536053	0.0835461
						Keratin, type II cytoskeletal 75 OS=Rattus norvegicus OX=10116 GN=Krt75 PE=3 SV=2	0.536053	0.0872467
						Isocitrate dehydrogenase [NAD] subunit beta, mitochondrial OS=Rattus norvegicus OX=10116 GN=Idh3B PE=2 SV=1	0.536053	1.07366
						AP-3 complex subunit delta OS=Rattus norvegicus OX=10116 GN=Ap3d1 PE=1 SV=1	0.536053	1.74958
						Nucleobindin-2 OS=Rattus norvegicus OX=10116 GN=Nucb2 PE=1 SV=1	0.545968	0.0105502
						Aspartate aminotransferase, mitochondrial OS=Rattus norvegicus OX=10116 GN=Got2 PE=1 SV=2	0.545968	0.0491485
						Non-specific serine/threonine protein kinase OS=Rattus norvegicus OX=10116 GN=Csnk2a2 PE=1 SV=1	0.545968	0.129011
						Mannan-binding lectin serine protease 1 OS=Rattus norvegicus OX=10116 GN=Masp1 PE=1 SV=1	0.545968	0.164309
						40S ribosomal protein SA OS=Rattus norvegicus OX=10116 GN=Rpsa PE=1 SV=3	0.545968	0.270835
						Synaptic vesicle membrane protein VAT-1 homolog OS=Rattus norvegicus OX=10116 GN=Vat1 PE=1 SV=1	0.545968	0.274088
						Coronin OS=Rattus norvegicus OX=10116 GN=Coro1c PE=1 SV=1	0.545968	1.32422
						AP complex subunit beta OS=Rattus norvegicus OX=10116 GN=Ap1b1 PE=1 SV=3	0.565597	0.296709
						Protein tyrosine phosphatase, non-receptor type 22 OS=Rattus norvegicus OX=10116 GN=Ptpn22 PE=1 SV=1	0.565597	0.551294
						RuvB-like helicase OS=Rattus norvegicus OX=10116 GN=Ruvbl2 PE=1 SV=1	0.565597	0.661544
						Piezo-type mechanosensitive ion channel component OS=Rattus norvegicus OX=10116 GN=Piezo2 PE=3 SV=3	0.565597	0.943095
						Zinc finger, C2HC-type-containing 1A OS=Rattus norvegicus OX=10116 GN=Zc2hc1a PE=1 SV=1	0.565597	0.954677
						Succinate dehydrogenase [ubiquinone] flavoprotein subunit, mitochondrial OS=Rattus norvegicus OX=10116 GN=Sdha PE=1 SV=1	0.565597	0.995679
						Ankycorbin OS=Rattus norvegicus OX=10116 GN=Rai14 PE=1 SV=2	0.575312	0.869666
						60S ribosomal protein L5 OS=Rattus norvegicus OX=10116 GN=Rpl5 PE=1 SV=3	0.575312	1.27737
						Synaptogyrin 3 OS=Rattus norvegicus OX=10116 GN=Syngr3 PE=1 SV=1	0.584963	0.415669
						Prolow-density lipoprotein receptor-related protein 1 OS=Rattus norvegicus OX=10116 GN=Lrp1 PE=1 SV=1	0.584963	0.430626
						Phosphatidylinositol 5-phosphate 4-kinase type-2 beta OS=Rattus norvegicus OX=10116 GN=Pip4k2b PE=1 SV=1	0.584963	0.899629
						Tubulin beta chain OS=Rattus norvegicus OX=10116 GN=Tubb4a PE=1 SV=1	0.584963	0.906578
						Synapsin-2 OS=Rattus norvegicus OX=10116 GN=Syn2 PE=1 SV=1	0.584963	1.12205
						NACHT and WD repeat domain-containing protein 2-like OS=Rattus norvegicus OX=10116 GN=LOC103694210 PE=4 SV=1	0.594549	0.0433514
						BTB domain-containing 8 OS=Rattus norvegicus OX=10116 GN=Btbd8 PE=4 SV=1	0.594549	0.29243
						Rab GDP dissociation inhibitor beta OS=Rattus norvegicus OX=10116 GN=Gdi2 PE=1 SV=2	0.594549	0.452225
						DnaJ (Hsp40) homolog, subfamily A, member 2 OS=Rattus norvegicus OX=10116 GN=Dnaja2 PE=1 SV=1	0.594549	0.493495
						ELKS/Rab6-interacting/CAST family member 1 OS=Rattus norvegicus OX=10116 GN=Erc1 PE=1 SV=1	0.594549	0.869666
						Alpha-centractin OS=Rattus norvegicus OX=10116 GN=Actr1a PE=1 SV=1	0.594549	1.07727
						Creatine kinase U-type, mitochondrial OS=Rattus norvegicus OX=10116 GN=Ckmt1 PE=1 SV=1	0.604071	0.31158
						Glia maturation factor OS=Rattus norvegicus OX=10116 GN=Gmfb PE=1 SV=2	0.604071	0.324222
						Serine/threonine-protein phosphatase 2B catalytic subunit beta isoform OS=Rattus norvegicus OX=10116 GN=Ppp3cb PE=1 SV=1	0.604071	0.543634
						Cationic trypsin-3 OS=Rattus norvegicus OX=10116 GN=Try3 PE=2 SV=1	0.604071	0.835647
						RAB11 family interacting protein 2 (Class I) (Predicted), isoform CRA_a OS=Rattus norvegicus OX=10116 GN=Rab11fip2 PE=4 SV=2	0.604071	1.01773
						WD repeat-containing protein 91 OS=Rattus norvegicus OX=10116 GN=Wdr91 PE=2 SV=1	0.613532	0.0381045
						Cathepsin D OS=Rattus norvegicus OX=10116 GN=Ctsd PE=1 SV=1	0.613532	0.259637
						Alpha-1-macroglobulin OS=Rattus norvegicus OX=10116 GN=A1m PE=1 SV=1	0.613532	0.554396
						Synaptophysin OS=Rattus norvegicus OX=10116 GN=Syp PE=1 SV=1	0.62293	0.866461
						Junction plakoglobin OS=Rattus norvegicus OX=10116 GN=Jup PE=1 SV=1	0.632268	0.0101054
						Keratin, type II cytoskeletal 80 OS=Rattus norvegicus OX=10116 GN=Krt80 PE=3 SV=1	0.632268	0.0168249
						Moesin OS=Rattus norvegicus OX=10116 GN=Msn PE=1 SV=1	0.632268	0.0788339
						Pyruvate kinase PKM OS=Rattus norvegicus OX=10116 GN=Pkm PE=1 SV=3	0.632268	0.688246
						Protein phosphatase 1 regulatory subunit OS=Rattus norvegicus OX=10116 GN=Ppp1r12a PE=1 SV=1	0.632268	1.27737
						Rho GTPase-activating protein 21 OS=Rattus norvegicus OX=10116 GN=Arhgap21 PE=1 SV=3	0.641546	0.444906
						Purine nucleoside phosphorylase OS=Rattus norvegicus OX=10116 GN=Pnp PE=1 SV=1	0.650765	0.048177
						Heat shock 70 kDa protein 1A OS=Rattus norvegicus OX=10116 GN=Hspa1a PE=2 SV=1	0.650765	0.2652
						Cytokeratin-1 OS=Rattus norvegicus OX=10116 GN=Krt1 PE=1 SV=1	0.650765	0.422508
						Twinfilin-1 OS=Rattus norvegicus OX=10116 GN=Twf1 PE=1 SV=1	0.650765	0.946922
						SRC kinase signaling inhibitor 1 OS=Rattus norvegicus OX=10116 GN=Srcin1 PE=1 SV=1	0.669027	0.0974532
						Tumor susceptibility gene 101 protein OS=Rattus norvegicus OX=10116 GN=Tsg101 PE=1 SV=1	0.669027	0.28567
						Lamin B2 OS=Rattus norvegicus OX=10116 GN=Lmnb2 PE=1 SV=2	0.669027	0.353596
						Arginine--tRNA ligase, cytoplasmic OS=Rattus norvegicus OX=10116 GN=Rars1 PE=1 SV=2	0.678072	0.455932
						Dematin actin-binding protein OS=Rattus norvegicus OX=10116 GN=Dmtn PE=1 SV=1	0.687061	0.10902
						Lys-63-specific deubiquitinase BRCC36 OS=Rattus norvegicus OX=10116 GN=Brcc3 PE=2 SV=1	0.687061	0.139662
						Hypothetical protein LOC500846 OS=Rattus norvegicus OX=10116 GN=LOC500846 PE=2 SV=1	0.687061	0.272459
						Patatin-like phospholipase domain-containing 6 OS=Rattus norvegicus OX=10116 GN=Pnpla6 PE=1 SV=2	0.687061	0.298432
						Secretory carrier-associated membrane protein OS=Rattus norvegicus OX=10116 GN=Scamp3 PE=1 SV=2	0.687061	0.681937
						Wee1-like protein kinase OS=Rattus norvegicus OX=10116 GN=Wee1 PE=1 SV=1	0.687061	0.920819
						Calcium/calmodulin-dependent protein kinase OS=Rattus norvegicus OX=10116 GN=Camk2g PE=1 SV=3	0.695994	0.772113
						Voltage-dependent anion-selective channel protein 1 OS=Rattus norvegicus OX=10116 GN=Vdac1 PE=1 SV=4	0.695994	0.876148
						Vitronectin OS=Rattus norvegicus OX=10116 GN=Vtn PE=1 SV=1	0.695994	0.91364
						ADAM metallopeptidase domain 22 OS=Rattus norvegicus OX=10116 GN=Adam22 PE=1 SV=3	0.704872	1.20135
						Gelsolin OS=Rattus norvegicus OX=10116 GN=Gsn PE=1 SV=1	0.713696	1.32975
						Pannexin-2 OS=Rattus norvegicus OX=10116 GN=Panx2 PE=1 SV=2	0.731183	1.50724
						26S proteasome non-ATPase regulatory subunit 6 OS=Rattus norvegicus OX=10116 GN=Psmd6 PE=1 SV=1	0.739848	0.359519
						RuvB-like 1 OS=Rattus norvegicus OX=10116 GN=Ruvbl1 PE=1 SV=1	0.739848	0.371611
						Hedgehog protein OS=Rattus norvegicus OX=10116 GN=Ihh PE=3 SV=2	0.739848	0.815309
						Activated RNA polymerase II transcriptional coactivator p15 OS=Rattus norvegicus OX=10116 GN=Sub1 PE=1 SV=3	0.757023	0.725842
						Serine and arginine-rich-splicing factor 4 OS=Rattus norvegicus OX=10116 GN=Srsf4 PE=1 SV=1	0.765535	0.00130484
						Tubulin alpha-4A chain OS=Rattus norvegicus OX=10116 GN=Tuba4a PE=1 SV=1	0.765535	1.14997
						Coronin OS=Rattus norvegicus OX=10116 GN=Coro2a PE=1 SV=1	0.765535	1.27737
						Carboxypeptidase E OS=Rattus norvegicus OX=10116 GN=Cpe PE=1 SV=1	0.773996	0.521434
						RCG37273, isoform CRA_a OS=Rattus norvegicus OX=10116 GN=Uqcc1 PE=1 SV=1	0.773996	0.966576
						Sortilin-related VPS10 domain-containing receptor 2 OS=Rattus norvegicus OX=10116 GN=Sorcs2 PE=3 SV=3	0.790772	0.195861
						ATP-dependent 6-phosphofructokinase, platelet type OS=Rattus norvegicus OX=10116 GN=Pfkp PE=1 SV=2	0.799087	1.02733
						Xph20	0.799087	1.11634
						Keratin 78 (Fragment) OS=Rattus norvegicus OX=10116 GN=Krt78 PE=4 SV=1	0.815575	0.195179
						26S proteasome regulatory subunit 8 OS=Rattus norvegicus OX=10116 GN=Psmc5 PE=1 SV=1	0.823749	0.411168
						Globin a4 OS=Rattus norvegicus OX=10116 GN=Hbb PE=1 SV=1	0.823749	0.434152
						Striatin 4 OS=Rattus norvegicus OX=10116 GN=Strn4 PE=1 SV=1	0.831877	0.266001
						Potassium voltage-gated channel subfamily A member 3 OS=Rattus norvegicus OX=10116 GN=Kcna3 PE=1 SV=2	0.83996	0.485452
						Similar to Solute carrier family 23, member 2 (Sodium-dependent vitamin C transporter 2) OS=Rattus norvegicus OX=10116 GN=RGD1565367 PE=2 SV=1	0.847997	0.129596
						26S proteasome regulatory subunit 6B OS=Rattus norvegicus OX=10116 GN=Psmc4 PE=1 SV=1	0.847997	0.623423
						Histone H2B OS=Rattus norvegicus OX=10116 GN=Hist2h2be PE=3 SV=3	0.85599	0.121478
						Keratin, type I cytoskeletal 42 OS=Rattus norvegicus OX=10116 GN=Krt42 PE=3 SV=1	0.863938	0.0282604
						Synaptogyrin-1 (Fragment) OS=Rattus norvegicus OX=10116 GN=Syngr1 PE=3 SV=1	0.895303	1.00393
						Mitochondrial ribosomal protein S12 OS=Rattus norvegicus OX=10116 GN=Mrps12 PE=1 SV=1	0.895303	1.41117
						Microtubule-associated serine/threonine-protein kinase 1 OS=Rattus norvegicus OX=10116 GN=Mast1 PE=1 SV=1	0.910733	0.41005
						Tubulin alpha chain OS=Rattus norvegicus OX=10116 GN=Tubal3 PE=1 SV=2	0.918386	0.349692
						Cytosol aminopeptidase OS=Rattus norvegicus OX=10116 GN=Lap3 PE=1 SV=1	0.925999	0.14691
						Succinate--CoA ligase [ADP-forming] subunit beta, mitochondrial OS=Rattus norvegicus OX=10116 GN=Sucla2 PE=1 SV=1	0.956057	0.661544
						Eukaryotic translation elongation factor 1 epsilon 1 OS=Rattus norvegicus OX=10116 GN=Eef1e1 PE=1 SV=1	0.963474	0.274088
						SET domain-containing protein 2 OS=Rattus norvegicus OX=10116 GN=Setd2 PE=1 SV=1	0.963474	0.600326
						Keratin, type I cytoskeletal 14 OS=Rattus norvegicus OX=10116 GN=Krt14 PE=2 SV=1	0.970854	0.114074
						Pyruvate kinase OS=Rattus norvegicus OX=10116 GN=Pkm PE=1 SV=1	0.970854	0.272459
						Homologous recombination OB-fold protein OS=Rattus norvegicus OX=10116 GN=Hrob PE=2 SV=1	1	0.0570004
						Bleomycin hydrolase OS=Rattus norvegicus OX=10116 GN=Blmh PE=1 SV=1	1	0.316053
						Keratin 76 OS=Rattus norvegicus OX=10116 GN=Krt76 PE=2 SV=1	1.01436	0.02365
						Nucleolin OS=Rattus norvegicus OX=10116 GN=Ncl PE=1 SV=1	1.01436	0.501689
						Myosin phosphatase Rho-interacting protein OS=Rattus norvegicus OX=10116 GN=Mprip PE=1 SV=1	1.02148	2.65956
						CREB3 regulatory factor OS=Rattus norvegicus OX=10116 GN=Crebrf PE=4 SV=1	1.04963	0.363512
						Calcium channel, voltage-dependent, alpha 2/delta subunit 2 OS=Rattus norvegicus OX=10116 GN=Cacna2d2 PE=1 SV=2	1.04963	0.793174
						Glutamate receptor-interacting protein 2 OS=Rattus norvegicus OX=10116 GN=Grip2 PE=1 SV=1	1.04963	0.970616
						Small nuclear ribonucleoprotein-associated protein B OS=Rattus norvegicus OX=10116 GN=Snrpb PE=2 SV=2	1.04963	1.0278
						Serine (Or cysteine) peptidase inhibitor, clade B (Ovalbumin), member 13 (Predicted) OS=Rattus norvegicus OX=10116 GN=Serpinb13 PE=3 SV=1	1.05658	0.344862
						Janus kinase and microtubule-interacting protein 2 OS=Rattus norvegicus OX=10116 GN=Jakmip2 PE=1 SV=1	1.07039	0.540608
						Peptidyl-prolyl cis-trans isomerase B OS=Rattus norvegicus OX=10116 GN=Ppib PE=1 SV=3	1.07039	1.23732
						Keratin, type II cytoskeletal 1b OS=Rattus norvegicus OX=10116 GN=Krt77 PE=4 SV=1	1.08406	0.19044
						POF1B, actin-binding protein OS=Rattus norvegicus OX=10116 GN=Pof1b PE=1 SV=2	1.09761	0.196543
						Protein phosphatase 1 regulatory subunit OS=Rattus norvegicus OX=10116 GN=Ppp1r12c PE=1 SV=1	1.09761	1.39254
						Alpha N-catenin OS=Rattus norvegicus OX=10116 GN=Ctnna2 PE=1 SV=3	1.11103	0.60206
						Unconventional myosin-IXa OS=Rattus norvegicus OX=10116 GN=Myo9a PE=1 SV=1	1.13093	0.476254
						Helicase-like transcription factor OS=Rattus norvegicus OX=10116 GN=Hltf PE=1 SV=1	1.14405	1.68825
						Non-specific serine/threonine protein kinase OS=Rattus norvegicus OX=10116 GN=Cdc42bpa PE=1 SV=1	1.1635	1.1343
						Alpha-amylase OS=Rattus norvegicus OX=10116 GN=Amy1a PE=1 SV=3	1.16993	0.818156
						Elongation factor 1-alpha 2 OS=Rattus norvegicus OX=10116 GN=Eef1a2 PE=1 SV=1	1.17632	0.730487
						Protein disulfide-isomerase A4 OS=Rattus norvegicus OX=10116 GN=Pdia4 PE=1 SV=1	1.20163	0.457175
						Glypican-1 OS=Rattus norvegicus OX=10116 GN=Gpc1 PE=1 SV=1	1.22033	1.36653
						Synergin gamma OS=Rattus norvegicus OX=10116 GN=Synrg PE=1 SV=3	1.22651	0.498941
						Keratin, type I cytoskeletal 10 OS=Rattus norvegicus OX=10116 GN=Krt10 PE=3 SV=1	1.28096	0.352617
						Myosin phosphatase Rho-interacting protein OS=Rattus norvegicus OX=10116 GN=Mprip PE=1 SV=1	1.28688	1.46471
						Ran GTPase-activating protein 1 OS=Rattus norvegicus OX=10116 GN=Rangap1 PE=1 SV=1	1.33342	0.605548
						Keratin, type I cytoskeletal 13 OS=Rattus norvegicus OX=10116 GN=Krt13 PE=3 SV=1	1.35614	0.238824
						Glutathione S-transferase, theta 3 OS=Rattus norvegicus OX=10116 GN=Gstt3 PE=1 SV=1	1.36737	0.0809219
						Uncharacterized protein OS=Rattus norvegicus OX=10116 PE=3 SV=3	1.41143	0.195179
						Keratin, type I cytoskeletal 17 OS=Rattus norvegicus OX=10116 GN=Krt17 PE=1 SV=1	1.45418	0.122053
						C-Jun-amino-terminal kinase-interacting protein 1 OS=Rattus norvegicus OX=10116 GN=Mapk8ip1 PE=1 SV=2	1.5656	0.966576
						Semaphorin-3C OS=Rattus norvegicus OX=10116 GN=Sema3c PE=3 SV=1	1.62293	0.91364
						WD repeat domain 37 OS=Rattus norvegicus OX=10116 GN=Wdr37 PE=1 SV=3	1.64155	0.542118
						Desmoplakin OS=Rattus norvegicus OX=10116 GN=Dsp PE=1 SV=1	1.73552	0.075204
						Obg-like ATPase 1 OS=Rattus norvegicus OX=10116 GN=Ola1 PE=2 SV=1	1.79494	0.910095
						PNMA family member 8B OS=Rattus norvegicus OX=10116 GN=Pnma8b PE=4 SV=1	1.79494	0.954677
						S-adenosylhomocysteine hydrolase-like protein 1 OS=Rattus norvegicus OX=10116 GN=Ahcyl1 PE=1 SV=2	1.94486	0.476254
						Pancreatic alpha-amylase OS=Rattus norvegicus OX=10116 GN=Amy2 PE=2 SV=2	2.31325	0.943095
						AP-3 complex subunit mu-2 OS=Rattus norvegicus OX=10116 GN=Ap3m2 PE=2 SV=1	2.51096	0.785156
						Nucleosome assembly protein 1-like 4 OS=Rattus norvegicus OX=10116 GN=Nap1l4 PE=1 SV=1	2.58256	0.222573
						Calcium uniporter protein OS=Rattus norvegicus OX=10116 GN=Mcu PE=1 SV=1	3.14078	0.468521
						Lamin A, isoform CRA_b OS=Rattus norvegicus OX=10116 GN=Lmna PE=1 SV=1	5.13791	0.876148
