# Supplementary material for: Engineering paralog-specific PSD-95 recombinant binders as minimally interfering multimodal probes for advanced imaging techniques
Source: eLife. 2024 Jan 3;13:e69620. doi: 10.7554/eLife.69620 (PMC10803022; doi:10.7554/eLife.69620)
Supplement: Figure 3—source data 1. [file elife-69620-fig3-data1.xlsx]

## Sheet: Fig3b
Fig 3b	Spreadsheet with the raw object enrichment data
	Object enrichment
	PSD95.FingR	Xph15	Xph18	Xph20
	4	8.29342	7.56375	10.3452
	11.1582	6.43978	6.33117	7.06972
	4.04003	6.58951	6.11908	9.32086
	4	5.02391	6.15267	7.79956
	3.6	6.76666	3.29071	10.0767
	4.4	7.7454	4.03356	15.151
	2.6	5.28088	3.98512	12.0227
	1.9	9.3729	6.03014	8.38116
	2.4	4.6619	8.77177	8.32241
	5.6	5.79021	7.58203	9.34849
	5.8	5.582	6.72257	6.40186
	3.8	5.74366	6.64232	8.43778
	3.4	4.81869	4.46762	11.5405
	16.6	5.50893	3.41882	7.18794
	1.9	4.31465	4.29478	11.1053
	3.2	8.35718	5.19003	8.95537
	7	5.43691	7.61613	8.33087
	7.6	6.48938	10.7786	6.13413
	8.7	7.73492	9.11454	4.87838
	9.3	6.43894	12.4904	8.53446
	7.5	4.82502	8.60323	7.87325
	5.9	3.69482	12.6271	9.9337
	6.3	4.54811	10.4756	8.31962
	6.1	8.24395	6.50329	7.12139
	11.9	5.85267	6.72637	8.78285
	10.1	6.95418	5.67898	10.4808
	11	4.34165	6.68101	9.91829
	7.3	8.53318	6.20923	8.21936
	4.6	7.7639	6.21742	7.40293
	3.1	5.49889	7.51471	9.75074
	3	5.69432	4.30126	6.32412
	4.2	5.54	8.37931	14.2152
	6.2	7.7439	6.8665	5.78101
	5.9	8.41544	6.52634	8.80992
	3	6.65674	12.0534	6.20701
	4.7	6.48728	7.75	6.27809
	4.1	7.2876	6.22704	8.93874
	8.5	2.18227	5.95671	10.3953
	3.9	6.00654	5.99961	4.78733
	4.3	5.50375	6.62482	6.01203
	11.2	5.83177	7.43367	5.63102
	10.3	6.32994	8.71407	4.81423
	10.3	7.26099	4.84798	6.80439
	9.6	5.92233	8.99207	8.72975
	6.6	6.7617	6.98746	6.68932
	6.4	7.68059	7.81439	8.26944
	7.1	8.00819	8.33073	8.07276
	7.1	5.70453	9.82777	7.28896
	9.2	6.58544	10.7477	6.21132
		7.84479	11.5665	7.89255
	5.1	6.41584		7.65774
	6.4		5.4	7.46375
	6.1	5.6	7	6.01104
	6.6	7	6.4	6.35043
	8.1	5.6	5.9	7.08966
	5.9	7	9.1	4.96557
	8.8	8	6.7	9.04349
		8.3	9.1	8.72188
			6.6	11.8097
			6	12.7322
			6.6	11.0908
			6.5	11.6576
			8.8
			8.1	8.1
			7.1	6.4
			8.2	6.8
			10.1	9.4
			9.2	6.2
			9.8	7.4
				10
				11.3
				11.3
				11.2
				6.1
				7.9
				9.5
				12.7
				8.2
				7.6
				5.2
				7.9
				8.2
				9.6
				8.7
				9.1
				7
				7.4
				6.3
				7.7
				8.2
				5.2
				8
				9.3
				8.5
				8.3
