# Supplementary material for: Engineering paralog-specific PSD-95 recombinant binders as minimally interfering multimodal probes for advanced imaging techniques
Source: eLife. 2024 Jan 3;13:e69620. doi: 10.7554/eLife.69620 (PMC10803022; doi:10.7554/eLife.69620)
Supplement: Figure 3—source data 2. [file elife-69620-fig3-data2.xlsx]

## Sheet: Fig3c
Fig 3c	Spreadsheet with the raw object colocalization percentage data
	Object colocalization (%)
	PSD95.FingR	Xph15	Xph18	Xph20
	13.2075	100	0	93.5484
	2.43902	45.7143	22.2222	97.1429
	40.9836	50	95	100
	10	100	80	95.8333
	0	100	61.5385	98.6842
	5.55556	94.7368	100	100
	0	100	50	97.3684
	0	75	100	88.8889
	0	97.7778	77.7778	100
	30.6667	71.4286	3.63636	97.8261
	0	90.9091	66.6667	100
	0	100	66.6667	93.75
	0	100	18.0328	100
	2.5641	0	100	100
	30.4348	100	93.75	87.5
	42.8571	100	91.6667	100
	42.8571	95	77.7778	100
	0	100	72.7273	100
	11.5385	35.7143	100	95.8333
	5.26316	50	87.5	87.5
	0	59.0909	83.3333	100
	30.4348	90.9091	77.7778	100
	28	100	100	100
	75	100	100	100
	80	88.8889	85.7143	100
	85.4839	80	92.3077	100
	58.8235	78.5714	4.30108	100
	87.037	100	71.4286	100
	90	86.6667	96.1538	96.7742
	100	100	70	100
	82.3529	87.5	85.7143	100
	84	87.5	100	100
	89.2857	93.75	16.6667	100
	79.3103	85.7143	93.3333	100
	100	78.7879	58.3333	100
	89.1566	90.9091	57.1429	100
	90.9091	66.6667	71.4286	100
	100	75	86.6667	100
	82.2581	74.0741	85.1852	100
	41.1765	77.7778	91.6667	100
	89.0625	87.5	72.7273	80
	84.6154	57.1429	100	100
	100	79.3103	77.7778	100
	73.2283	92.8571	100	93.1507
	60	86.4865	92.3077	100
	65.2174	77.7778	96.1538	96.7742
	83.7838	66.6667	100	100
	100	69.2308	91.4286	100
	64.7059	88.2353	88.8889	87.5
	91.6667	62.5	100	87.5
	78.5714	100	77.7778	0
	90.625	90.9091	90.4762	100
	35.7143	100	48.7179	100
	68.1818	86.1111	100	100
	91.6667	100	93.3333	95.6522
	62	100	97.619	75
	61.1111	88.8889	90.1961	100
	63.6364	93.3333	94.7368	88.8889
	66.6667	80	80	100
	70	100	76.1905	100
	66.6667	100	50	83.3333
	77.7778	100	97.2222	92.3664
	61.1111	96	73.3333	94.4444
	89.6552	100	87.5	55.5556
	78.7879	90	100	29.2683
	85.7143	100	100	10
	91.1765	90.4762	66.6667	63.7363
	85.7143	91.1111	48.4375	67.6923
	70	97.2973	82.6087	65
	92.8571	100	0	31.25
	0	92.0635	0	87.5
	82.0513	77.7778	10	0
	80	92.3077	68.1818	33.3333
	72.7273	100	67.9245	0
	66.6667	100	71.1111	0
	100	83.3333	50	62.5
	85.1852	77.7778	33.3333	26.3158
	74.2857	100	75	26.3158
	89.6552	100	66.6667	54.3478
	84	95.6522	81.25	62.963
	80.9524	93.75	50	0
	86.9048	82.3529	83.3333	80
	88.5246	91.6667	90	65.5738
	76.9231	88.8889	70	0
	95.6522	100	83.3333	0
	88	100	80	65.3061
	76.9231	100	87.0968	23.0769
	85.2941	100	79.1667	0
	88.8889	100	81.25	50
	100	83.3333	90.7407	16.6667
	78.9474	100	87.8049	73.6842
	57.1429	100	96.6667	100
	50	100	66.6667	44.0678
	87.5	100	90.4762	44.4444
	83.3333	100	96.5517	0
	27.2727	94.7368	93.3333	33.3333
	72.2222	100	70	0
	80	94.8718	90.4762	0
	75	100	96.5517	72.3077
	86.1111	100	90	100
	66.6667	88.2353	100	90.4762
	53.3333	100	95.8333	100
	33.3333	100	50	100
	80.7692	100	100	100
	100	100	93.3333	100
	65.7143	83.3333	100	100
	76.9231	100	71.4286	100
	86.2069	83.3333	88	100
	88.6364	100	78.5714	100
	52.9412	100	94.4444	100
	71.4286	100	87.5	95
	92.3077	100	100	100
	75	100	100	93.75
	80	100	92.3077	100
	20	100	100	100
	90.9091	100	81.8182	100
	76	100	100	100
	100	100	83.3333	62.5
	85.1852	100	66.6667	100
	46.6667	100	100	100
	92.8571	100	88.8889	100
	54.5455	100	100	100
	72.2222	100	100	100
	57.8947	100	73.6842	100
	82.7586	100	85.7143	100
	84.6154	100	100	100
	92	100	83.3333	100
	92.3077	100	58.3333	100
	97.561	100	63.6364	100
	93.1034	100	100	100
	56.25	100	100	100
	64.7059	100	95.122	100
	92.8571	100	88.5714	93.9394
	100	100	54.8387	100
	56.25	100	95.2381	100
	73.3333	100	0	84.6154
	87.5	100	81.4815	100
	80	100	63.6364	100
	100	100	97.6744	95
	78.9474	100	100	83.3333
	65	100	100	100
	88.8889	85.7143	96.4286	100
	90.4762	100	50.8571	100
	75	100	88	100
	46.1538	83.3333	0	100
	75	100	95.8333	16.6667
	89.4737		95.4545	100
	84		94.7368	78.2609
	0		100	100
	50		85.7143	100
	87.5		100	100
	0		89.4737	100
	36.3636		100	100
	76.9231		97.2222	86.6667
	0		0	93.75
	13.8889		0	100
	0		0	92
	100		77.7778	92.3077
	0		83.3333	83.3333
	50.7246		100	100
	55.5556		100	93.75
	0		100	100
	27.2109		100	100
	32.8358		100	100
	0		100	100
	73.913		100	100
	0		100	100
	0		91.3043	100
	76.4706		100	100
	54.3478		100	100
	58.8235		69.2308	100
	100		66.6667	100
	34.0909		94.3396	100
	37.037		100	100
	0		100	100
	50		100	100
	60		96.4286	80
	7.14286		100	100
	53.6585		100	100
	21.4286		100	87.5
	32		100	100
	44.4444		100	93.3333
	66.6667		94.1176	100
	50		100	90
	50		82.7586	100
	42.1053		100	66.6667
	16.6667		88.2353	100
	42.3077		100	91.8919
	60.8696		100	97.9167
	52.6316		89.2857	94.1176
	12.5		100	81.25
	25		100	78.5714
	75		100	100
	59.0909		100	95.2381
	53.3333		91.6667	100
	0		100	100
	55		100	96
	45.4545		97.5	100
	53.125		90.9091	66.6667
	60		78.9474	100
	61.5385		100	93.9024
	62.5		66.6667	92.8571
	77.2727		92.8571	91.6667
	76		100	72.2222
	50		100	100
	50		100	100
	48.4848		100	91.3043
	58.8235		86.6667	88.2353
	52.9412		85.7143	62.5
	59.0909		100	94.7368
			96	95
			83.3333	100
			95.4545	90
			100	83.3333
			71.4286	100
			100	100
			100	88.8889
			100	93.75
			77.7778	93.4783
			85.7143	91.6667
			100	100
			100	100
			93.75	100
			100	0
			78.5714	92.3077
			71.4286	73.3333
			71.4286	100
			100	100
			100	80
			100	100
			95	88.4615
			100	93.75
			90	87.5
			100	95.2381
			77.7778	90.1961
			100	66.6667
			100	85.7143
			100	78.5714
			100	100
			100	100
			100	100
			100	97.4359
			100	96.5517
			100	100
			100	100
			92.3077	95
			84.6154	100
			80	94.7368
			44.4444	100
			100	92.3077
			55.5556	100
			100	86.9565
			100	100
			100	100
			100	82.3529
			100	70
			76.4706	100
			100	100
			100	100
			100	100
			100	100
			100	93.3333
			100	100
			100	100
			100	80
			100	100
			100	100
			94.1176	100
			100	100
			100	100
			100	100
			100	94.1176
			100	90
			100	100
			100	100
			100	75
			100	88.8889
			100	85.7143
			100	92
			100	91.6667
			50	100
			100	100
			100	95.4545
			100	100
			95.8333	91.6667
			97.0588	100
			100	95.6522
			100	100
			100	100
			50	100
			10.2564	100
			100	100
			100	100
			38.3333	100
			100	47.0588
			100	100
			100	100
			100	100
			100	100
			75	100
			100	100
			100	100
			100	100
			100	90
			100	91.6667
			100	84.375
			100	100
			92.8571	77.7778
			66.6667	62.5
			69.2308	100
			100	92
			97.561	100
			68.1818	95.2381
			83.3333	100
			46.6667	100
			75	100
			100	94.1176
			88.2353	100
			88.4615	100
			80	87.5
			83.3333	75
			95.8333	100
			85.2941	100
			75	85.7143
			96.6667	94.4444
			72	90.9091
			77.7778	97.3684
			62.5	100
			91.6667	87.5
			100	100
			12.5	100
			75	100
			66.6667	0
			98.0769	94.1176
			77.7778	82.7586
			98.5294	91.3043
			90	100
			77.7778	88.8889
			63.6364	100
			95.5224	100
			71.4286	95.7447
			66.6667	73.3333
			25	75
			84.6154	82.3529
			66.6667	92.8571
			83.3333	80
			90	100
			66.6667	100
			86.6667	100
			83.9286	93.4426
			96.9697	100
			88.2353	94.4444
			85.7143	95.4545
			92.8571	100
			50	91.3043
			85.7143	91.3043
			60	97.2222
			70	100
			93.3333	100
			71.4286	100
			75	100
			91.8919	100
			50	78.9474
			0	100
			65.2174	100
			66.6667	100
			73.3333	100
			44.4444	75
			62.5	26.9231
			62.5	100
			85.7143	100
			22.2222	64.7059
			50	85.7143
			71.4286	100
			100	89.4737
			87.5	71.4286
			84.6154	61.1111
			100	90
			96.6667	73.3333
			100	85.7143
			83.3333	0
			83.3333	70
			88.4615	16.6667
			100	92.3077
			100	0
			100	50
			93.1034	11.1111
			100	80
			91.6667	83.3333
			90	50
			88.8889	73.1707
			76.9231	57.1429
			91.1765	76.9231
			71.4286	66.6667
			93.1034	91.6667
			100	100
			95.8333	63.6364
			100	72.3577
			100	56.25
			98.3607	53.8462
			100	94.1176
			83.3333	66.6667
			96.7742	54.5455
			100	0
			100	100
			88.8889	30
			89.7436	66.6667
			85.7143	72.9167
			95.4545	100
			77.7778	96
			100	100
			96.6102	100
			100	100
			97.561	100
			100	100
			75	100
			100	96.4286
			100	88.2353
			100	92.8571
			87.5	90
			100	100
			100	83.3333
			100	83.3333
			100	83.3333
			100	36.3636
			90	100
			100	100
			100	84.6154
			100	57.1429
			100	88.8889
			100	100
			100	100
			100	100
			98.75	100
			100	100
			100	95.4545
			100	100
			100	100
			93.75	92.3077
			88.8889	100
			98.5915	100
			72.7273	83.3333
			100	100
			71.4286	100
			100	100
			25	100
			66.6667	100
			92.8571	100
			92	96.1538
			71.875	100
			87.5	100
			60	85.7143
			90	100
			92.5926	100
			64.2857	100
			66.6667	100
			95.6522	100
			60	87.5
			81.8182	40
				72.7273
				62.5
				50
				60
				44.4444
				46.6667
				77.7778
				77.7778
				60
				78.3784
				77.7778
				50
				100
				42.8571
				88
				63.6364
				90.3226
				94.1176
				100
				85.7143
				100
				100
				100
				93.75
				100
				100
				100
				100
				100
				100
				100
				100
				100
				100
				91.3793
				91.6667
				93.3333
				92.8571
				98
				66.6667
				94.8718
				72.7273
				100
				92.8571
				100
				90.9091
				85.7143
				98.2759
				100
				93.75
				50
				22.2222
				93.75
				70
				71.4286
				93.0233
				66.6667
				71.4286
				50
				68.75
				100
				100
				100
				100
				100
				100
				100
				100
				100
				100
				100
				97.7778
				100
				100
				100
				95
				94.7368
				88.8889
				86.6667
				100
				100
				100
				82.3529
				100
				75
				100
				87.5
				97.3684
				58.8235
				93.3333
				93.75
				85.7143
				87.5
				100
				100
				100
				100
				96.7742
				100
				100
				100
				85.7143
				100
				94.7368
				92
				83.3333
				84.6154
				86.3636
				100
				100
				100
				90.4762
				100
				100
				100
				100
				100
				100
				100
				100
				100
				100
				100
				100
				100
				97.7778
				100
				85.1852
				100
				100
				95
				94.7368
				88.8889
				100
				80
				100
				100
				100
				76.4706
				100
				75
				100
				68.75
				100
				100
				92.3077
				100
				100
				100
				83.3333
				93.75
				83.3333
				76.9231
				100
				88.8889
				95.122
				100
				28.5714
				50
				86.6667
				62.5
				64.7059
				100
				83.3333
				94.4444
				97.9167
				80
				91.6667
				86.6667
				100
				90
				84.6154
				57.1429
				72.2222
				54.5455
				80.9524
				75
				9.09091
				57.1429
				91.6667
				66.6667
				75
				75
				85.7143
				60
				78.7879
				33.3333
				100
				68
				25
				100
				85.7143
				75
				97.3684
				80
				62.1622
				61.5385
				100
				71.4286
				97.2222
				83.3333
				77.7778
				25
				25
				33.3333
				70
				28.5714
				53.3333
				37.5
				25
				75
				45.8333
				65.3846
				12.5
				58.8235
				51.2195
				62.5
				64.7059
				66.6667
				81.25
				54.5455
				68.75
				46.875
				88.2353
				80.2817
				59.5238
				45.4545
				80
				72.973
				85
				72.7273
				42.8571
				51.8519
				57.6923
				66.6667
				44.4444
				75
				37.8378
				50
				18.1818
				30.7692
				33.3333
				69.2308
				25
				85.7143
				33.3333
				42.8571
				40
				78.5714
				62.5
				58.3333
				18.1818
				61.9048
				37.5
				50
				33.3333
				64.2857
				55.5556
				56.8182
				70.8333
				100
				30
				83.3333
				66.6667
				40
				62.5
				33.3333
				78.9474
				60
				50
				27.2727
				81.7518
				58.8235
				27.2727
				73.0769
				28.5714
				14.2857
				51.9231
				53.3333
				68.9655
				76.4706
				60.6061
				41.6667
				28.5714
				43.75
				62.5
				58.8235
				53.3333
				25
				37.5
				18.1818
				70
				50
				60.8696
				42.8571
				42.8571
				40
				67.8571
				66.6667
				83.3333
				78.5714
				85.7143
				100
				75
				55.5556
				58.3333
				54.5455
				75.6757
				72.4138
				76.9231
				78.9474
				75.6098
				66.6667
				89.6552
				73.6842
				55.5556
				60
				64.2857
				63.6364
				26.3158
				30
				69.2308
				73.8095
				62.5
				55.5556
				76.9231
				50
				68.75
				59.2593
				60
				62.5
				80.9524
				68.9655
				88.2353
				75
				58.3333
				83.3333
				100
				76.4706
				66.6667
				66.6667
				44.4444
				56.25
				80.9524
				90
				71.4286
				86.6667
				100
				33.3333
				81.0811
				63.6364
				66.6667
				80
				100
				88.2353
				65
				33.3333
				83.3333
				72.7273
				83.3333
				59.0909
				82.6087
				30
				82.1429
				90.566
				82.7586
				90.4762
				89.0909
				95.2381
				86.3636
				88.8889
				100
				83.3333
				77.7778
				95.2381
				93.8776
				53.8462
				68.75
				53.8462
				71.4286
				92.3077
				100
				78.2609
				72.7273
				92.3077
				76.1905
				81.8182
				90
				95.4545
				50
				94.7368
				96.2963
				85.7143
				91.6667
				93.75
				88.2353
				0
				94.2857
				81.8182
				64.2857
				61.5385
				88.8889
				94.4444
				0
				94.4444
				30.7692
				52.9412
				93.3333
				100
				75.3846
				92.5926
				58.8235
				89.8305
				100
				84.6154
				100
				57.1429
				100
				100
				76.6667
				68.1818
				64.2857
				91.3043
				85
				83.7838
				94.4444
				73.6842
	3.33333	100	49.1228	100
	0	100	28.5714	100
	7.69231	100	0	100
	12.5	100	12.5	100
	0	100	70.2703	100
	62.5	100	81.8182	100
	0	100	94.1176	100
	0	100	66.6667	100
		100	4.7619	85.7143
	0	100	47.3684	100
	94.7368	100	43.75	100
	39.3103	100	18.1818	100
	89.4737	100	68.75	100
	0	100	94.4444	100
	51.8072			100
	0	100	100	100
	0	100	91.6667	100
	0	100	100	100
	100	100	100	100
	0	100	100	100
	0	100	100	100
	0	100	100	100
	55.102	100		100
	100	100	100	100
	100	100	77.2727	100
		100	98.7952	100
	100	100	100	100
	52.4229	100	100	100
	100	100	92.5	100
	41.6667	100	100	100
	87.5	100	100	100
	0	100	100	100
	4.05405	100	100	100
	0	100	100	100
	6.25	100	100	100
	58.3333	100	100	96.6667
	82.3529	100	100	100
	0		100	100
	0	100	100	100
	0	100	100	100
	100	100	100	100
	41.8803	100	100	100
	88.8889	100	88.5246	100
	0	100	20.8333	100
	100	100	100	100
	83.3333		84.2105	100
	69.7674	100	100
	0	100	100	100
	0	100	84.8	100
	0	100	100	100
	88.0952	100	100	100
	34.0426	100	99.0826	100
	65	100	100	100
	100	100	83.3333	100
	42.3077			100
	76.9231	100	100	100
	84.2105	100	0	94.4444
	29.1667	100	100	100
	30.7692	100	100	100
	59.4286	100	100	100
	0	100	100	100
	61.8421	100	100	100
	21.1268	100	100	100
	55.5556	100	100	100
	19.3548	100	100	100
	8.13953	100	100	75
	66.6667	100	100	100
	0	100	100	100
	45	100		100
	10.3448	100	76.2238	100
	0	100	100	100
	11.1111	100	87.5	100
	0	100	100	100
	0	100	100	100
	0	100	100	100
	0		100	100
	0	100	100	100
	0	100	100	100
	1.94805	100	100	100
	31.9149	100	100	100
	40.1869	100	100	47.0588
	11.1111	100	100	100
		100	100	100
	0	100	100	100
	0	100	100	100
	42.1053	100	100	100
	85.1852	100	100	100
	76	100	100
	61.5385	100	95	100
	74.0741		100	100
	100	100		100
	97.561	100	80.1887	100
	94.8052	100	100	100
	12.5	100	100	100
	38.0952	100	68.8172
	9.52381	100	100	100
	100	100	92.8571	100
	85.7143	100	100	100
	65.8291	100	100	100
	0	100	87.5	100
	81.8182	100	66.6667	100
	88.8889	100	100	100
	85.7143	100	100	100
	92.1569	100	73.0769	100
	65.2778		100	100
	86.8852	100	100	100
	89.6552	100	100	100
	77.7778	100	100	100
	100	100	100	100
	100	100	92.8571	100
	99.6283			100
	100	100	100	100
	98.374	100	100	100
	100	100	75	100
	100	100	100	100
	100	100	90	100
	100	100	100	100
	100	100	100	100
	100	100	100	100
	100	100	100	100
	100	100	92.5926	100
	45.283	100	100	100
	89.2857	100	51.2195	100
	100	100	100	100
	99.162	100	98.5075	100
	80	100	100	100
		100	100	100
	80.2326	100	100	100
	86.4865	100	57.1429	100
	72.7273	100	86.1111	100
	86.9565	100	0	100
	100	100	100	100
	97.4684	100	100	100
	0	100	100	100
	17.8571	100	0	100
	92.8571	100	0	100
	87.4251	100	94.1176	100
	100	100	100	100
	82.9787	100	100	100
	35	100	100	100
	100	100	79.4118	93.75
	96.7742	100	47.929	100
	33.3333	100	83.3333	100
		100	83.7209	100
	0	100	100	100
	0	100	100	100
	0	100	0	100
	4.16667	100	100	100
	40	100		100
	92.3077	100	71.4286	100
	5.76923	100	37.5	100
	10.5263	100	100	100
	81.8182	100	86.8421	100
	8	88.8889	100	100
	90	100	100	100
	0	100	63.6364	100
	0	100	100	100
	0	7.80781	100	100
	3.84615		100
	44.4444	100	77.7778	100
	85.7143	100	90.9091	100
	0	100	72.3404	100
	75	100	100	100
	54.5455	100	100	100
	16.6667	100	100	100
	92.8571	100	97.2222	100
	92.3077	100	95	100
	100	100	64	100
	4.34783	100	92.3077	100
	0	100	100	100
	58.8235	100	100	100
	0	100	87.234	100
	0	100	97.9592	100
	39.5833	100	100	98.6486
	8.33333	100	100	100
	55.5556	100	100	100
	26.6667	100	100	100
	94.2857	100	100	100
	62.5	100	100	100
	54.5455	100	100	100
	46.6667	100	100
	100	100	100	100
	0	96.1538	100	100
	0	100	100	100
	36.3636	100	100	100
	100	100	100	100
	100	100	100	100
	81.8182	100	100	100
	83.3333	100	100	100
	100	100	100	100
	66.6667	100	100	100
	14.2857	100	100	100
	83.7838	100	93.0233	100
		100	100	100
	0	100	96.2963	100
	15.0943	100	100	100
	57.1429	100	100	100
	0	100	100	100
	34.5455	100	100	100
	2.17391	100	100	100
	36.3636	100	93.1818
	35	100	100	100
	0	100	93.1034	100
	5.26316	97.3684	100	100
	0		61.7647	100
	57.1429	100		100
	100	100	100	100
	76.5957	95.9184	100	100
	13.2075	86.3636	100	100
	38.8889	100	100	100
	0	89.2857	100	100
	46.875	100	100	94.4444
	21.0526	40	100	100
	0	100	100	100
	0	58.3333	100
	17.5824	99.359	100	100
	0	16.6667	100	100
	25	91.0053	100	100
	0	54.5455	100	100
	72	95.8904	100	100
	5.88235	57.1429	100	100
	23.5294	100	100	100
	40.9091	100	100	100
	66.6667	95.4545	100	100
	41.3793	95.5556	100	100
	80.9524	100	100
	33.3333	45.4545	100	100
	53.719	100	100	100
	36.3636	100	100	100
	21.875	66.6667	100	100
	100	64.7059	100	100
	0	45.3608	100	100
	15.5556	100	100	100
	3.84615	67.5214	100	100
	0	64.375	100	100
	92.8571	91.6667	100
	27.2727		100	81.8182
	94.4444	36.5385	100	100
	100	82.9268	100	100
	98.5294	100	100	92.8571
	100	100	100	97.0588
	28.4211	89.7727	100	100
	27.7778	86.2069		86.6667
	88.8889	85.7143	100	92.5926
	54.2857	80.9524	100	100
	100	100	100	90
	94.7368	75	100	89.7436
	100	100	100	100
	100	100	100	100
	20	91.0256	100	100
	100	37.5	100	100
	0	76.4706	100	100
		100	100	100
	100	100	100	100
	100		100	88.8889
	99.5984	100	100	100
	96.4286	100	100
	100	97.2222	100	100
	100	100	100	100
	100	100	100	100
	100	100	100	100
	100	100	100	100
	100	100	100	100
	100	100	100	100
	100	100	100	100
	100	96.2963	100	100
	100	100	100	100
	88.521	100	100	100
	90	100	100	100
	100	100	100	100
	98.6301	100	100	100
	100	100	100	100
	9.09091	100	100	100
	100	100	100	100
	100	85.7143	100	100
		96	100	100
	81.8182	97.619	100	100
	100	100	100	100
	85.7143	100		100
	100	95.3846	100	100
	100	100	100	100
	100	100	100	100
	75	100	100	100
	77.1429	100	100	100
	71.4286	100	100	100
	100	100	100	100
	100	100	100	100
	100	100	100	100
	100	100	100	100
	100	100	100	100
	100	100	100	100
	100	100	100	100
	100	100	100	100
	57.1429	100	100	100
	88.5714	100	100	100
	96.5517	100	100	100
	44.4444	100	100	100
	47.8873	100	100	100
	92.8571	100	100	100
	85.2941	100	100	100
	94.4444	97.0588	100	100
	100	100	100	100
	50	100	100	100
	58.5366	100	100
	78.7879		100	100
	86.6667	100	100	100
	75	98.9011	100	100
	100	100		100
	18.1818	100	100	100
	41.8919	100	100	100
	100	96.7213	100	100
	59.7484	100	100	100
	98.7952	100	100	100
	29.4118	100	100	100
	96.0938	100	100	100
	100	100	100	100
	0	100	100	100
	83.3333	100	100	100
	84.2105	100	100	100
	62.7119	100	100	100
	94.4444	100	100	100
	92.3077	100	100	100
	78.7879	100	100	100
	100	100	100	100
	94.7368	100	100	100
	83.9506	100	100	100
	98.9362	100	100	100
	100	100	100	100
		100	100	100
	100	100	100	100
	100	100	100	100
	100	100	100	100
	100	100	100	100
	100	100	100	100
	100	100	100	100
	100	100	100	100
	100	100	100	100
	86.9565	100	100	100
	100	100	100	100
	100	100	100	100
	100	100	100	100
	91.6667	100	100
	100	100	100	100
	100	100	100	100
	100	100	100	100
	95.4545	100	100	100
	62.069		100	100
	66.6667	100	100	100
	100	100	100	100
	100	100	100	100
	98	100	100	100
	38.4615	100	100	100
	84.6154	100	100	100
	100	100	100	100
	100	100	100	100
	90.9091	100	100	100
	100	78.7879	100	100
		100	100	100
	100	100	100	100
	100	100	100	100
	100	100	100	100
	100	91.3043	100
	100	100	100	100
	87.5	100		100
	100	100	100	100
	100	100	100	100
	100	100	100	100
	100	100	100	100
	100	100	100	100
	100	100	100	100
	100		100	100
	100	100	100	100
	100	100	100	100
	100	100	100	100
	100	100	100	100
	100	100	100	100
	100	100	100	100
	100	100	100	100
	100	100	100	100
	100	100	100	100
	0	100	100	100
	100	100	100	100
	100	100	100	100
	100	100	100	100
	100	100	100	100
	100	100	100	100
	100	100	100	100
	100	100	100	100
			100	100
	100	100	100	100
	100	100	100	100
	94.4444	100	100	100
	100	100	100	100
	100	100	100	100
	100	100	100	100
	100	100	100	100
	100	100	100
	100	100	100	100
	100	100	100	100
	100	100	100	100
	87.5	100	100	100
	44.4444	100	100	100
	96.1538	100	100	100
	83.3333	100	100	100
	100	100		98.4848
	100	100	50	100
	100	100	97.5	100
	100	100	100	100
	100	100	100	100
	100	100	83.3333	100
	100	100	85.7143	100
	100	100	56	100
	100		76.6667	100
	100	100	100	100
	100	100	88	100
	92.3077	100	100	92.8571
	100	100	83.3333	100
	100	100	100	100
		100	79.5918	100
	100	100	100	95.082
	100	100	60	97.1429
	100	100	100	100
	57.1429	100	100	100
	100	100	95.8333	91.8367
	100	100	100	100
	100	100	92.8571	93.9394
	97.4684		66.6667	100
	100	100	93.1034	33.3333
	100	100	100
	90.9091	100	64.2857	100
	100	100	68.1818	86.25
	100	100	95.4545	90.9091
	92.8571	100	58.3333	83.3333
	100	94.4444	100	100
	100	100	52.381
	87.5	100	91.4286	100
	100	100	23.8095	100
	100	100	83.3333	100
	85.7143	100	100	100
	100	100	65.2174	100
	83.3333	100	0	100
	100	100	71.1111	100
	100	100	100	100
	100	100	29.7297	100
	100	100	100	100
	100	100	52.2727	100
	100	100	0	100
	100	100	88.8889	100
	100	100	0	100
	100	100	100	100
	100	100	48.1481	100
	100	100	96.875	100
	83.871	100		100
	100		100	100
	94.7368	100	100	100
	100	100	100	100
	100	100	100	100
	100	100	100
	77.7778	100	91.6667	100
	100	100	83.3333	100
	100	100	100	100
	100	100	100	100
	100	100	100	100
	83.3333	100	100	100
	100	100	54.5455	100
	96.2963	100	100	100
	100	100	100	100
	100	100	100	100
	100	100	85.7143	100
	100	100	50	100
	100	100	100	100
	60	100	83.3333	100
	100	100	100	100
	100	100	100	100
	93.3333	100	76.9231	100
	100	100	100	100
	100		87.5	100
	100	100	100	88.8889
	83.3333	100
	100	100	77.7778	100
	84.6154	100	0	100
	100	100	100	90.9091
	100	100	0	100
	100	100	0	100
	100	100	100	100
	97.0588	100	75.7576	100
	100	100	30	93.3333
	100	100	0	100
	81.8182	100	80	100
	100	100	54.5455	100
	81.8182	100	12	84.6154
	95.6522	100	76.4706	100
	100	100	66.6667	100
	100	100	0	96.6887
	83.3333	100	41.6667	100
	100	100	20	100
	100	100	40	100
	100	100	41.1765	100
	100	100	0	100
	100	100	0	100
	100	100	0	100
	100	100	0	100
		100	62.5	100
		100	0	100
	94.1176		62.5	100
	90.9091	87.3239	17.6471	100
	100	100	69.5652	100
	100	100		100
	78.5714	100	100	100
	71.4286	100	100	100
	0	100	100	100
	62.5	100	100	100
	100	100	100	100
	87.5	100	100	100
	100	100	100	100
	72.4138	100	100	100
	85	96.4706	100	100
	100	100	100	100
	100	100	100	100
	100	100	100	100
	100	100	75	100
	90.9091	100	100	100
	72.7273	100	100	100
	96.7742	100	100	100
		100	100	100
	42	100	100	100
	0	100		100
	0	100	100	100
	26.1538	100	100	100
	0	100	100	100
	24.4444	100	83.3333	100
	0	100	100	100
	27.451	100	100	100
	0	100	100	100
	35.7143	100		100
	8.49057	100	100	100
	61.5385	100	100	100
	0	100	100	100
	0	100	100	100
	71.6981	100	100	100
	0	100	100	100
	0	100	100	100
	0	100	100	100
	10	100	100	100
	0	100	100	100
	17.5439	100	100	97.5
	0	100	100	100
	6.45161		100	100
	0	100	100	100
	0	100	100	100
	0	100	100	100
	9.72222	100	84	100
	0	100	100	100
	15.7895	100		100
	57.1429	100	100	100
	0	100	100	100
	68.75	100	100	100
	58.5366	100	100
	71.4286	100	100	100
	29.6296	100	100	100
	48		100	100
	100	100	100	100
	51.8519	100	100	100
	65.2174	100	100	100
	2.32558	62.5	100	50
	0	100	100	100
	47.2222	25	100	100
	0	100		94.1176
	20.6897	100		100
	40	100	62.5	100
	0	95.6522	100	100
	3.2967	85.7143	100	66.6667
	13.1579	100	100	100
	28.4483	100	100	100
	0	100	100	100
	27.4038	100	100	100
	71.1538	100	100	100
	83.3333	100	100	100
	0	100	100	100
	10.6796	100	100	100
	42.6471	100	95.2381	50
	4.65116	100	100	90
	70	100	100	92.3077
	77.3196	100	100	100
	45.4545	100	100	100
	19.2982	100	100	100
	0	100	100	100
	37.037	100	100	100
	83.3333	100	100	100
	62.1622	100	100	100
	78.125	100	100	100
	0	100	100	100
	0	100		96
	100	100	100	100
	61.5385	100	100	100
	92.8571	100	100	100
	18.75	100	100	100
	51.4286	100	100	100
	0	100	100	100
	0	100	100	100
	76.9231		100	100
	41.8605	100	100	0
	0	100	100
	0	100	100	100
	0	100		100
	0	100	100	100
	21.0526	100	100	100
	0	100	100	92.3077
	25	100	100	100
	0	100	100	100
	47.3684	100	100	100
	0	100	100	100
	0	100	100	100
	59.0909	100	100	94.4444
	0		100	100
	0	100	100	92.3077
	84.2105	100	100	100
	0	100	100	100
	0	100	100	100
	10	100		100
		100	100	100
	85.7143	100	100	100
	0	100	100	100
	83.3333	100	100	100
	46.9388	100	100	100
	40		100	93.5484
	0	100	100	100
	60	100	100	100
	48.2759	100	100	100
	50	100	100	100
	95	100	100	100
	48	100	100	100
	59.2593	100	100	100
	0	100	100	100
	72.7273	100	100	100
	0	100	100	100
	80.7692	100	100	100
	37.5	100	100	100
	90	100	100	100
	30.7692		100	100
	72.7273	100	100	100
	36.3636	100	100	100
	0	100	100	100
		100	100	100
	66.6667	100	100	100
	100	100	100	100
	100	100	100	100
	100	100	100	100
	90.9091	100	100	100
	100	100	100
	100	100	100	100
	100	100	100	100
	57.1429	100	100	100
	80	100	100	100
	62.5	100		100
	100	100	100	100
	94.9367	100	100	100
	56.5217	100	100	100
		100	100	100
	100	100	100	100
	100	100	100	100
	16.6667		100	100
	22.2222	100	100	100
	100	100	100	100
	16.6667	100	100	100
	93.5484	100	100	100
	100	100	100	100
	100	100	100	100
	100	100	100	100
	100	100	100	100
	100	100	100	100
	61.9048	100	100	100
	100	100	100	92.8571
	100	100	100	100
	100	100	100	100
	100	100	100	100
	100	100	100	100
		100	100	100
	100	100	100	100
	100	100	100	100
	100	100	100	100
	100	100	100	100
	100	100	100
	100	100	100	4.7619
	100	100	100	100
	100	100	100	100
	100	100	100	100
	100	100	100	100
	100	100	100	100
	96.6667	100	100	100
	100	100	100	0
	100	100	100	100
		100	100	100
	100	100	100	100
	66.6667	100	100	100
	100	100	100	100
	100	100	100	100
	100	100	100	100
	100	100	100	100
	100	100	100	100
	100	100	100	100
		100	100	100
	78.5714	100	100	100
	85.7143		100	100
	63.1579	100		100
	100	100	0
	100	100	0	100
	22.2222	100	100	100
	0	100	100	100
	40.9091	100	6.66667	100
	0	100	100	100
	90	100	100	100
	94.1176	100	100	100
	100	100	0	100
	44.4444	100	100	100
	100	100	100	72.7273
	100	100	17.8667
	92.5	100	100	100
	80	100	100	100
	100	100	100	100
	100	100	100	100
	100	100	100	90.9091
	86.9565	100	100	100
		100	100	100
	100	100	100	100
	84.6154	100	100	100
	100	100	2.14592	100
	100	100	100	100
	90.9091	100	100	100
	100	100	0	100
	100		100	100
	100	100	100	100
	100	100	100	100
	100	100	0	100
	100	100	100	100
	100	100	100	100
	100	100	100	100
	100	100		100
	100	100	100	100
	100	100	100	100
	100	100	87.8049	100
	100	100	100	100
		100	100
	0	100	81.8182	100
	100	100	100	100
	100	100	100	100
	100	100	100	100
	100	100	100	100
	100	100	100	100
	63.6364	100	96.4286	100
	100	100	98.9474	100
	100	100	96.875
	100	100	98.1132	100
	100	100	100	100
	100	100	100	100
	100	100	100	100
	100	100	100	100
		100	90.9091	100
	100	100	100	100
	100	100	100	100
	100	100	100
	100	100	100	100
	100	100	100	100
	100	100		100
	100	100	100	100
	100	100	100	100
	0	100	100	100
	100	100	100	100
	100	100	100	100
	100	100	100	100
	62.5		100	100
	100	100	100	100
	100	100	100
	100	100	100	100
	100	100	100	100
	100	100	100	100
	100	100	100	100
	100	100	100	100
	100	100	100	100
	100	100	100	100
	100	100	100	100
	100	100	100	100
	100	100	100	100
	100	100	100	100
	100	100	100	100
	100	100	100	100
		100	100	100
	0	100	100	100
	18.1818	100	100	100
	0	100	100	100
	0	100	100	100
	0	100	100	100
	0	100	100	100
	0	100	100	100
	0	100	100	100
	63.1579	100	100	100
	0	100	100	100
	28	100	100	100
	0	100	100	100
	13.3333	100	100	100
	0	100	100	100
	31.5789	100	100	100
	45.7143		100	100
	0	100	100	100
	0	100	100	100
	0	100	100
	0	100	100	100
	15.3846	100	100	100
	0	100	100	100
	71.4286	100	66.6667	100
	76	100	100	100
	55.5556	100	100	100
	0	100	100	100
	12.5	100	100	100
	0	100	100	100
		100	100	100
	0	100	100	100
	0	100	100
	33.3333	100	100	100
	100	100	100	100
	0	100		100
	100	100	100	100
	0	100	100	100
	59.0909	100	100	100
	100	100	100	100
	0		100	100
	0	100	100	100
	100	100	100	100
	94.1176	100	100	100
	0	100	100	100
	48.1481	100	100	100
	40	100	100	100
	0	100	100	100
	56.25	100	100	100
	66.6667	100	100	100
	75	100	100	100
	4.16667	100	100	100
	0	100	100	100
	0	100	100	100
		100	100	100
	0	100	100	100
	60	100	100	100
	0	100	100	100
	46.1538	100	100	100
	0	100	100	100
	0	100	100	100
	0	100	100	100
	100	100	100	100
	0		100	100
	0	100	100	100
	92.3077	100	100	100
	20	100	100	100
	25	100	100
	57.8947	100	100	100
	61.7647	100	100	100
	0	100	100	100
	0	100	100	100
	12.5	100	100	100
	0	100	100	100
	42.8571	100	100	100
		100	100	100
	100	100	100	100
	100	100	100	100
	100	100	100	100
	100	100	100	100
	100	100	100	100
	100	100	100	100
	100	100	100	100
	100		100	100
	100	100	100	100
	100	100	100	100
	100	100	100	100
	100	100	100	100
	100	100	100	100
	100	100	100	100
	100	100	100	100
	100	100	100	100
	100	100	100	100
		100	100	100
	59.2593	100	100	100
	0	100	100	100
	73.913	100	100	100
	94.1176	100	100
	51.3514	100	100	100
	100	100	100	100
	41.3793	100	100	100
	96.6667	100	100	100
	100	100	100	100
	20	100	100	100
	100	100	100	100
	41.1765	100		100
	64.3836	100	100	100
	59.2965	100	100	100
	0	100	100	100
	59.2593	100	100	100
	79.6296	100	100	100
	18.1818		100	100
	0	100	100	100
	26.087	100	87.5	100
	42.8571	100	100	100
	0	100	100	100
	50	100	100	100
	100	100	100	100
	0	100	93.3333	100
	0	100	100	100
	66.6667	100	100	100
	33.3333	100	97.7273	100
		100	100
	98.1828	100	94.8718	100
	100	100	75	100
	100	100	100	100
	100	100	100	100
	98.8764	100	100	100
	42.1053	100	100	100
	100	100	100	100
	100	100	100	100
	100		100	100
	57.1429	100	100	100
	100	100	100	100
	100	100	72.2222	100
	100	100	100	100
	100	100	57.1429	100
	99.8172	100	88.8889	100
	100	100		100
	100	100	100	100
	100	100	100	100
	100	100	88.3721	100
	100	100	100	100
	100	100	100	100
	100	100	100	100
	100	100	100	100
	100	100	100	100
	100	100	100	100
	100	100	100	100
	100	100	100	100
	100	100	100	100
	100	100	100
	100	100	100	100
	100	100	100	100
	100	100	100	100
	100	100	100	100
	100	100	100	100
	100	100	96.2963	100
	100	100	95.4545	100
	100	100	100	100
	100	100	100	100
	100	100	100	100
		100	95	100
	27.5862	100	100	100
	0.990099	100	100	100
	0	100	100	100
	83.3333	100	100	100
	0	100	97.9592	100
	11.1111	100	100	100
	100	100	100	100
	71.4286	100	100	100
	3.57143	100	100	100
	42.8571	100	100	100
	33.3333	100	100	100
	38.8889	100	100	100
	42.8571	100	100	100
	100	100	13.7931	100
	0	100	100	100
	58.75	100	100	100
	85	100	100
	59.7826	100	100	100
	77.5	100	94.7368	100
	96.4286	100		100
	100	100	100	100
		100	100	100
	85.2632	100	100	100
	100	100	100	100
	100	100	100	100
	10.5263	100	83.3333	100
	100	100	100	100
	89.4737	100	100	100
	82.4561	100	100	100
	87.6923	100	100	100
	100	100	100	100
	100	100	100	100
	96.9697	100	100	100
	100	100	100	100
	100	100	100	100
	75	100	100	100
		100	100	100
	4.87805	100	100	100
	0	100	100	100
	0	100	100	100
	0	100	100	100
	0		100	100
	0	100	100	100
	0	100	100	100
	61.5385	100	100	100
	0	100	100	100
	26.087	100	100	100
	87.5	100	100	100
	0	100	100	100
	0	100	100	100
	0	100	100	100
		100	100	100
	30	100		100
	100	100	100	100
	100	100	100	100
	77.7778	100	100	100
	14.7059	100	100	100
	100	100	66.6667	100
	86.5385	100	92.8571	100
	47.3684	100	100	100
	0	100	100	100
	26.6667	100	100	100
		100	100	100
	0	100	100	100
	0	100	100	100
	4.34783	100	100	100
	0	100	100	100
	0	100	100	100
	44.4444	100	100	100
	0	100	100	100
	44.4444	100	100	100
	10	100	100	100
	4.16667	100	89.7059	100
	0	100	100	100
	0	100	100	100
	9.09091	100	100	100
	0	100	100	100
	3.77358	100	100	100
	0	100	100	100
	0	100	100	100
	5.08475	100	100	100
	52.9412	100	100	100
	0		100
	6.06061	0	100	100
	50	100	100	100
	0	76.1905	100	100
	0	0	100	100
	7.31707	52.1739	100	100
	0	0	100	100
	0	77.7778	79.1667	100
	0	15.7895	100	100
	0	100	100	100
	0	0	100	100
	78.9474	100	100	100
	0	100	100	100
	0	100	100	100
	0	0	100	100
	46.6667	100	52.2727	100
	0	0	100	100
	0	95.8333	100	100
	48	100	100	100
	0	95.8333	100	100
	0	100	100	100
	0	100	100	100
	14.4928	100	16.6667	100
	0	87.5		100
	0	100	100	100
	0	100	100	100
	17.3913	0	100	100
	0	100	100	100
	78.2609	100	100	100
	0	100	100	100
	14.2857	12.5	100	100
	0	70	100	100
	0	91.3386	100	100
	18.1818	100	100	100
	0	90.4762	100	100
	55.5556	71.4286	100	100
	0	52.9412	100	100
	0	100	100	100
	12.5	100	100	100
	0	100	100	100
	0	100	100	100
	6.12245	100	100	100
	0	96.9697	100	100
	0	100	100	100
	18.5185	31.8182	100	100
	25	100	100	100
	0	62.0879	100	100
	0	0	100	100
		0	100	100
	100	6.57895	100	100
	100	100	100	100
	100	100	100	100
	100	100	100	100
	100	100	100	100
	87.5	91.6667	100	100
	100	100	100	100
	50	16.6667	100	100
	0	0	100	100
	80	80	100	100
	100	100	100
	87.8788	0	100	100
	100	90	100	100
	95.122	100	100	100
	100	66.6667	100	100
	76.1905	71.4286	100	100
	100	33.3333	100	100
	76.087	92.0635	100	100
		68.1818	100	100
	100	88.8889		100
	100	75.7576	100	100
	100	0	100	100
	100	80.3571	100	100
	100	100	100	100
	100	0	100	100
	100	100	100	100
	100	92.3077	100	100
	100	100	100	100
	100	100	100	100
	100	100	100	100
	100	100	100	100
	100	0	100	100
[truncated: 812 more rows]
