# Supplementary material for: Engineering paralog-specific PSD-95 recombinant binders as minimally interfering multimodal probes for advanced imaging techniques
Source: eLife. 2024 Jan 3;13:e69620. doi: 10.7554/eLife.69620 (PMC10803022; doi:10.7554/eLife.69620)
Supplement: Figure 3—source data 3. [file elife-69620-fig3-data3.xlsx]

## Sheet: Fig3d
Fig 3d	Spreadsheet with the raw PSD-95-positive objects percentage data
	PSD-95-positive objects (%)
	PSD95.FingR	Xph15	Xph18	Xph20
	0	86.4	71.4	100
	100	100	92	96.3
	92.1	100	100	42.9
	94.1	100	95	46.2
	94.9	100	100	100
	88.5	100	100	14
	64.7		100	100
			100	94.7
			83.9	100
			100	100
			100	97.6
			100	100
			95.3	100
			91.5	100
			100	96.8
			100	96.2
			85.7	83.8
			100	95.8
				100
				78.9
				100
				95.7
				100
				100
				98
				93
				65.5
				56.1
				93.5
				87.5
				100
				90.9
	12.5	100	42.8571	100
	43.75	100	100	97.5
	35.71	100	96.7742	100
	81.3953	100	92.3077	100
	75	100	100	100
	44.898	100	100	100
	37.931	100	86.4865	100
	95.4545	100	98.2143	100
	86.5385	97.8723	100	100
	96.4286	100	100	100
	96.6667	87.0968	100	100
	96.5517	88.2353	100	100
	100	100	100	100
	95	100	85.1064	100
	24.2105	100	96	96.7742
	40.9091	100	39.2857	100
	100	100	100	100
	83.3333	100	100	100
	100	100	100	100
	100	100	100	93.1818
	76.1905	100	100	100
	100	100	100	100
	92.8571	100	100	90.9091
	96.4286	97.4359	100	100
	14.2857	100	100	100
	39.1304	100	75	100
	25	100	100	100
	100	100	100	100
	100	100	100	100
	50	100	100	100
	97.4359	100	97.6744	100
	47.619	100	100	100
	92.8571	100	98.0769	100
	14.2857	100	100	100
	50	100	100	100
	5.97015	100	100	100
	88.8889	100	93.5484	100
	100	100	100	100
	100	100	100	100
	81.0811	75	100	100
	95.6522	85.4167	100	100
	100	100	100	100
	100	100	100	100
	100	90.9091	100	98.1818
	75	100	89.2857	100
	100	100	90.7407	100
	100	100	100	100
	100	100	95.8333	100
	100	100	100	100
		100	100	100
		100		100
				100
				100
				100
				100
				100
				100
				100
				66.6667
				85.7143
				100
				100
