# Supplementary material for: Engineering paralog-specific PSD-95 recombinant binders as minimally interfering multimodal probes for advanced imaging techniques
Source: eLife. 2024 Jan 3;13:e69620. doi: 10.7554/eLife.69620 (PMC10803022; doi:10.7554/eLife.69620)
Supplement: Figure 3—source data 4. [file elife-69620-fig3-data4.xlsx]

## Sheet: Fig3f
Fig 3f	Spreadsheet with the fluorescence recovery data
		Total Cells	9		Total Cells	10		Total Cells	8		Total Cells	5
		Total Spines		107	Total Spines		108	Total Spines		73	Total Spines		77
		# independent experiments		6	# independent experiments		4	# independent experiments		4	# independent experiments		2
	Time	Xph20			Xph18			Xph15			PSD-95-EGFP
		Mean	SEM	N	Mean	SEM	N	Mean	SEM	N	Mean	SEM	N
	0	0	0	9	0	0	10	0	0	8	0	0	5
	0.5	0.0359662	0.020323	9	0.0653001	0.0101801	10	0.110381	0.0581006	8
	1	0.0422891	0.0216224	9	0.0972391	0.0161207	10	0.0747816	0.0321635	8	0.0365116	0.0543233	5
	1.5	0.0563801	0.0343391	9	0.112162	0.0188584	10	0.161816	0.0531579	8
	2	0.0755093	0.0389103	9	0.118283	0.0267834	10	0.196596	0.0434717	8	0.0282234	0.0473249	5
	2.5	0.0807709	0.0232404	9	0.131639	0.0259504	10	0.18875	0.0464412	8
	3	0.0844857	0.0462704	9	0.149975	0.0259677	10	0.188446	0.0493929	8	0.091307	0.0397733	5
	3.5	0.0810628	0.0340365	9	0.162904	0.0257151	10	0.217372	0.0494551	8
	4	0.118713	0.0253882	9	0.167003	0.0280928	10	0.277525	0.0703959	8	0.108682	0.0201611	5
	4.5	0.10569	0.0258743	9	0.190339	0.0290934	10	0.275958	0.0625171	8
	5	0.117442	0.0256686	9	0.181673	0.0340736	10	0.275158	0.0528357	8	0.134843	0.0337645	5
	5.5	0.109026	0.026743	9	0.191861	0.0339713	10	0.271961	0.0457991	8
	6	0.156424	0.0275839	9	0.198452	0.0319536	10	0.311653	0.0561152	8	0.122997	0.0174948	5
	6.5	0.138124	0.0285622	9	0.196091	0.0325035	10	0.269921	0.0540847	8
	7	0.150482	0.0303248	9	0.203327	0.0324832	10	0.304495	0.0497657	8	0.125039	0.0295089	5
	7.5	0.166444	0.0357627	9	0.219043	0.0376456	10	0.300589	0.0405578	8
	8	0.190423	0.0309165	9	0.219426	0.0380162	10	0.328373	0.0522507	8	0.166153	0.0418382	5
	8.5	0.201389	0.0336724	9	0.222947	0.0381237	10	0.348817	0.0546032	8
	9	0.194058	0.0336864	9	0.232531	0.039087	10	0.304569	0.0498187	8	0.179788	0.0436468	5
	9.5	0.192963	0.0349638	9	0.229489	0.0388266	10	0.378963	0.0484629	8
	10	0.185364	0.0316189	9	0.236774	0.0373318	10	0.335128	0.0635698	8	0.144034	0.0470426	5
	10.5	0.179254	0.0368955	9	0.242907	0.035785	10	0.350809	0.0504537	8
	11	0.173026	0.0330317	9	0.242454	0.0398011	10	0.414296	0.0674395	8	0.23051	0.0436165	5
	11.5	0.218639	0.0359931	9	0.236398	0.0414317	10	0.372473	0.0522078	8
	12	0.216606	0.0348371	9	0.244153	0.0447148	10	0.435273	0.0558236	8	0.174472	0.0339466	5
	12.5	0.204	0.0378801	9	0.253002	0.0376915	10	0.456592	0.0778489	8
	13	0.209085	0.0387244	9	0.255023	0.0392763	10	0.413884	0.0490681	8	0.162792	0.0426042	5
	13.5	0.202824	0.0374159	9	0.274205	0.0342749	10	0.427685	0.063116	8
	14	0.225916	0.0347305	9	0.269574	0.041469	10	0.433495	0.0770769	8	0.191747	0.0356357	5
	14.5	0.234612	0.042759	9	0.267394	0.043507	10	0.434708	0.0626765	8
	15	0.217913	0.0346036	9	0.269678	0.0439475	10	0.440271	0.0587339	8	0.181911	0.0389482	5
	15.5	0.237973	0.0409084	9	0.271832	0.0431234	10	0.416098	0.0509193	8
	16	0.252223	0.0385465	9	0.28528	0.0464482	10	0.441937	0.0686579	8	0.215226	0.049141	5
	16.5	0.233907	0.0509013	9	0.266188	0.0468805	10	0.462409	0.0682524	8
	17	0.242888	0.0397425	9	0.286285	0.0395929	10	0.463109	0.05589	8	0.173358	0.0410179	5
	17.5	0.255519	0.0462468	9	0.286872	0.0446462	10	0.458112	0.0629465	8
	18	0.273476	0.0438397	9	0.293679	0.0447601	10	0.398431	0.0598365	8	0.215429	0.0361128	5
	18.5	0.272248	0.0422515	9	0.285909	0.0434584	10	0.47362	0.0497286	8
	19	0.263566	0.0442846	9	0.290717	0.0459233	10	0.517169	0.067042	8	0.170333	0.0409193	5
	19.5	0.268885	0.0392605	9	0.291308	0.0443605	10	0.526662	0.0882196	8
	20	0.253836	0.0496896	9	0.299962	0.0473557	10	0.483296	0.0725151	8	0.225184	0.0464716	5
	20.5	0.287057	0.0457839	9	0.302924	0.045803	10	0.49367	0.0468758	8
	21	0.264095	0.0443154	9	0.302816	0.0460495	10	0.489239	0.0646947	8
	21.5	0.282565	0.0436006	9	0.30112	0.0423428	10	0.495734	0.0453191	8
	22	0.302883	0.0416346	9	0.306091	0.0444276	10	0.536604	0.0664841	8
	22.5	0.270691	0.0416615	9	0.31346	0.0433517	10	0.490382	0.0408015	8
	23	0.295522	0.042927	9	0.304603	0.0515227	10	0.540305	0.0553513	8	0.196331	0.0613289	5
	23.5	0.286717	0.0471066	9	0.317029	0.0474498	10	0.49471	0.0419914	8
	24	0.298516	0.0460805	9	0.309887	0.0489479	10	0.534413	0.0639397	8
	24.5	0.316821	0.0498478	9	0.311044	0.0497894	10	0.563022	0.0542292	8
	25	0.295868	0.0489585	9	0.3194	0.0446815	10	0.493969	0.037808	8
	25.5	0.311252	0.0556514	9	0.317882	0.050367	10	0.523324	0.0466539	8
	26	0.302167	0.0466588	9	0.318511	0.0437499	10	0.519715	0.0529056	8	0.237863	0.040205	5
	26.5	0.278807	0.0452047	9	0.322379	0.049856	10	0.506538	0.0412065	8
	27	0.333709	0.0533556	9	0.322805	0.048219	10	0.512205	0.0449204	8
	27.5	0.318419	0.0498467	9	0.321969	0.0521548	10	0.542553	0.03857	8
	28	0.3022	0.0468625	9	0.337132	0.0449306	10	0.50864	0.0418151	8
	28.5	0.307734	0.0458947	9	0.338249	0.0447355	10	0.549439	0.0594758	8
	29	0.328195	0.0498198	9	0.348202	0.0413557	10	0.546622	0.0578172	8	0.220614	0.031762	5
	29.5	0.350878	0.0533699	9	0.350695	0.0477312	10	0.558856	0.0421463	8
	30	0.354718	0.0524665	9	0.340241	0.0474861	10	0.554658	0.0527099	8
	30.5	0.338227	0.0466375	9	0.35835	0.0500124	10	0.531563	0.0448986	8
	31	0.348469	0.052417	9	0.354177	0.0467925	10	0.555067	0.0589228	8
	31.5	0.345088	0.0459964	9	0.348776	0.0439227	10	0.549428	0.0534507	8
	32	0.34794	0.0525253	9	0.347193	0.0456103	10	0.541315	0.0530445	8	0.157093	0.0390895	5
	32.5	0.357258	0.0495434	9	0.344442	0.046928	10	0.530697	0.0550778	8
	33	0.313275	0.0456306	9	0.347027	0.0478396	10	0.616801	0.0550182	8
	33.5	0.360507	0.0510671	9	0.354641	0.0474883	10	0.613981	0.0808807	8
	34	0.379356	0.0542242	9	0.347071	0.0485676	10	0.56663	0.0575042	8
	34.5	0.371706	0.0498266	9	0.344008	0.0506939	10	0.55452	0.0579086	8
	35	0.373876	0.047568	9	0.345502	0.0516933	10	0.580096	0.0660092	8	0.236583	0.0453968	5
	35.5	0.355482	0.0530078	9	0.338256	0.0550463	10	0.626218	0.0822445	8
	36	0.372033	0.050819	9	0.359927	0.0462852	10	0.58896	0.049334	8
	36.5	0.352502	0.0467294	9	0.359311	0.0509449	10	0.658429	0.0830975	8
	37	0.364945	0.0524246	9	0.361856	0.0473116	10	0.666334	0.0799156	8
	37.5	0.394301	0.0501522	9	0.355138	0.0474813	10	0.604363	0.0585169	8
	38	0.367675	0.0490952	9	0.360836	0.0452523	10	0.652348	0.0937132	8	0.203512	0.0571301	5
	38.5	0.373609	0.0465652	9	0.366394	0.0430698	10	0.668645	0.111813	8
	39	0.37726	0.0465701	9	0.375225	0.0452986	10	0.642802	0.0615234	8
	39.5	0.39824	0.0555091	9	0.369221	0.0509407	10	0.639205	0.0935877	8
	40	0.387664	0.0527881	9	0.380269	0.0479166	10	0.682833	0.0682072	8	0.234211	0.027277	5
	43	0.414726	0.0556489	9	0.369519	0.0491634	10	0.67079	0.0679892	8	0.364819	0.113909	5
	46	0.41648	0.0525111	9	0.401985	0.0442982	10	0.647208	0.0722793	8	0.275046	0.0327493	5
	49	0.442593	0.0565587	9	0.39539	0.0463992	10	0.681478	0.081054	8	0.272087	0.0548462	5
	52	0.421199	0.0533	9	0.410012	0.0422476	10	0.631971	0.0473636	8	0.257334	0.0407973	5
	55	0.425857	0.0569701	9	0.423711	0.0422214	10	0.699413	0.0828614	8	0.212066	0.039022	5
	58	0.431055	0.0654885	9	0.428075	0.0396118	10	0.707902	0.0896734	8	0.260818	0.0366517	5
	61	0.440876	0.0497807	9	0.427563	0.0438218	10	0.705409	0.115109	8	0.220693	0.0470084	5
	64	0.451818	0.0576628	9	0.443853	0.0453608	10	0.715047	0.0562963	8	0.285065	0.0326022	5
	67	0.491558	0.0556391	9	0.469522	0.0422207	10	0.758031	0.0872189	8	0.244958	0.0571282	5
	70	0.441379	0.0613631	9	0.457568	0.0399549	10	0.755413	0.0661797	8	0.213225	0.0741808	5
	73	0.512669	0.0616112	9	0.477845	0.0435675	10	0.720919	0.0582283	8	0.258373	0.0318275	5
	76	0.472632	0.0563502	9	0.478942	0.0407281	10	0.749302	0.0592394	8	0.248345	0.0376994	5
	79	0.485933	0.0622142	9	0.479491	0.0414803	10	0.797381	0.0975463	8	0.249435	0.0385527	5
	82	0.464734	0.0560941	9	0.47772	0.0407366	10	0.775218	0.0909698	8	0.241152	0.0531018	5
	85	0.471272	0.0613906	9	0.476803	0.0461144	10	0.78598	0.0788618	8	0.26775	0.0400252	5
	88	0.435744	0.0586111	9	0.492104	0.0471273	10	0.749913	0.0847514	8	0.257973	0.0471021	5
	91	0.465682	0.0592895	9	0.506749	0.0458568	10	0.727334	0.0701795	8	0.250235	0.0450543	5
	94	0.471742	0.0586701	9	0.482045	0.0488424	10	0.726702	0.0809574	8	0.24501	0.0354046	5
	97	0.504474	0.0604879	9	0.496949	0.0469359	10	0.720807	0.0314468	8	0.258991	0.0334162	5
	100	0.497419	0.0636747	9	0.495555	0.0487367	10	0.768097	0.0637745	8	0.254752	0.0531107	5
	103	0.480026	0.060094	9	0.499264	0.0494646	10	0.75645	0.0613124	8	0.320902	0.0453009	5
	106	0.507386	0.0596766	9	0.519176	0.052756	10	0.775714	0.061697	8	0.204352	0.0671562	5
	109	0.522291	0.0598464	9	0.512726	0.0557961	10	0.809177	0.0508464	8	0.265223	0.071157	5
	112	0.510612	0.0588555	9	0.518288	0.0580223	10	0.827588	0.0470829	8	0.275275	0.0457739	5
	115	0.528476	0.0658163	9	0.530715	0.0547339	10	0.852299	0.117812	8	0.27338	0.0419624	5
	118	0.537812	0.050812	9	0.521436	0.0611034	10	0.80256	0.104094	8	0.270568	0.0495254	5
	121	0.53772	0.0554887	9	0.534524	0.0603192	10	0.801473	0.0736821	8	0.360958	0.0761983	5
	124	0.535596	0.0649027	9	0.51011	0.0525836	10	0.792186	0.0627941	8	0.304697	0.0414634	5
	127	0.52924	0.0563227	9	0.530942	0.0554356	10	0.771497	0.0735552	8	0.351866	0.0553196	5
	130	0.544659	0.0522207	9	0.531458	0.0499603	10	0.792604	0.0707786	8	0.294125	0.0397461	5
	133	0.5699	0.0588622	9	0.542525	0.0470074	10	0.8029	0.101071	8	0.332794	0.0663152	5
	136	0.570025	0.0532	9	0.551505	0.05189	10	0.794733	0.0698698	8	0.334218	0.0488796	5
	139	0.593826	0.0559347	9	0.554832	0.0489381	10	0.835936	0.0806636	8	0.348162	0.0441349	5
	142	0.58104	0.065694	9	0.548732	0.0447923	10	0.764466	0.0378487	8	0.338569	0.0560384	5
	145	0.615069	0.062586	9	0.543504	0.0497179	10	0.788272	0.0386817	8	0.346171	0.0430296	5
	148	0.583609	0.0591395	9	0.558894	0.0432201	10	0.762073	0.0542968	8	0.341752	0.040191	5
	151	0.577073	0.0633132	9	0.563906	0.0506475	10	0.799753	0.0408037	8	0.346432	0.0531333	5
	154	0.610193	0.0573688	9	0.562733	0.0505508	10	0.81257	0.0689739	8	0.284274	0.0365356	5
	157	0.605014	0.0591333	9	0.5744	0.046398	10	0.798176	0.0542735	8	0.355336	0.0430983	5
	160	0.632455	0.0618879	9	0.569242	0.047501	10	0.829153	0.0745312	8	0.270727	0.0654488	5
	163	0.613676	0.0610973	9	0.582373	0.0438928	10	0.7738	0.0518296	8	0.277205	0.0404495	5
	166	0.617539	0.0543709	9	0.578079	0.0440509	10	0.842165	0.089779	8	0.29986	0.0526141	5
	169	0.637226	0.05208	9	0.58195	0.0448085	10	0.831296	0.0607174	8	0.260193	0.0599396	5
	172	0.607218	0.0485404	9	0.592235	0.048272	10	0.796584	0.0712456	8	0.279172	0.0509408	5
	175	0.604735	0.055045	9	0.580279	0.0481213	10	0.817121	0.0558243	8	0.313972	0.0403905	5
	178	0.636049	0.0588894	9	0.585978	0.0485546	10	0.779129	0.084526	8	0.359868	0.0772699	5
	181	0.616936	0.0530183	9	0.595433	0.0439797	10	0.80217	0.0876709	8	0.336494	0.0551119	5
	184	0.598313	0.053109	9	0.604936	0.0445695	10	0.822023	0.0783649	8	0.362596	0.0833884	5
	187	0.613241	0.0608633	9	0.585546	0.0483338	10	0.817337	0.0865276	8	0.298069	0.0648664	5
	190	0.637009	0.0625303	9	0.595464	0.0493524	10	0.876946	0.132608	8	0.290583	0.0780411	5
	193	0.609228	0.057937	9	0.588426	0.0527504	10	0.749033	0.0741222	8	0.345158	0.0580452	5
	196	0.657462	0.0744032	9	0.617536	0.0543278	10	0.836531	0.0884271	8	0.333021	0.0562501	5
	199	0.604152	0.0604783	9	0.619769	0.0540441	10	0.844968	0.084519	8	0.368024	0.0613723	5
	202	0.658181	0.0690181	9	0.621335	0.0529439	10	0.817317	0.0743065	8	0.38607	0.068307	5
	205	0.673106	0.0680548	9	0.626672	0.0597251	10	0.819137	0.0975962	8	0.368232	0.0625605	5
	208	0.622688	0.0578128	9	0.629027	0.0484502	10	0.81532	0.0846903	8	0.429164	0.0933829	5
	211	0.62512	0.0604667	9	0.638498	0.0532035	10	0.804904	0.0641005	8	0.376798	0.0732864	5
	214	0.630424	0.0636629	9	0.641542	0.0542229	10	0.831363	0.0813707	8	0.43279	0.0998434	5
	217	0.641944	0.0608739	9	0.633567	0.053168	10	0.813881	0.0732988	8	0.395896	0.0772812	5
	220	0.652214	0.0561746	9	0.625099	0.0535694	10	0.800384	0.0872125	8	0.403546	0.0860652	5
	223	0.636192	0.0607836	9	0.618518	0.0493424	10	0.810791	0.0784783	8	0.373521	0.0694703	5
	226	0.676026	0.0704162	9	0.64143	0.0523896	10	0.83818	0.083822	8	0.453974	0.0981639	5
	229	0.677847	0.0703174	9	0.639153	0.0550967	10	0.88063	0.107857	8	0.358848	0.0499521	5
	232	0.676577	0.0731685	9	0.626716	0.051355	10	0.854886	0.101952	8	0.371548	0.0568147	5
	235	0.697732	0.0759264	9	0.62795	0.0550013	10	0.874877	0.0870854	8	0.352076	0.0533383	5
	238	0.699501	0.0775962	9	0.64918	0.0547232	10	0.844018	0.0755279	8	0.349457	0.0525307	5
	241	0.666214	0.0764023	9	0.638153	0.0495352	10	0.831676	0.0900063	8	0.360298	0.0668447	5
	244	0.68514	0.0611995	9	0.649647	0.0542935	10	0.803788	0.0717309	8	0.410868	0.077676	5
	247	0.677825	0.0710776	9	0.656695	0.0465827	10	0.853572	0.0845503	8	0.381438	0.0788376	5
	250	0.705475	0.0698871	9	0.658507	0.0557275	10	0.927956	0.110702	8	0.422994	0.110582	5
	253	0.733242	0.0775481	9	0.651674	0.0535462	10	0.829796	0.0732227	8	0.390149	0.070311	5
	256	0.657546	0.071721	9	0.650775	0.0535151	10	0.874992	0.0848462	8	0.386155	0.0816188	5
	259	0.684246	0.0732533	9	0.681784	0.0533513	10	0.800627	0.0750535	8	0.368898	0.0707488	5
	262	0.695765	0.0747021	9	0.671315	0.0562072	10	0.79859	0.0669486	8	0.366186	0.0730679	5
	265	0.702344	0.0721197	9	0.661719	0.049371	10	0.808543	0.0641248	8	0.389635	0.0590365	5
	268	0.699197	0.0719162	9	0.65975	0.0548782	10	0.819326	0.0902592	8	0.405483	0.0774629	5
	271	0.719508	0.0855292	9	0.681672	0.0538964	10	0.771352	0.0902336	8	0.405753	0.065001	5
	274	0.689204	0.0706838	9	0.681937	0.0512049	10	0.801993	0.065408	8	0.379222	0.0810525	5
	277	0.707183	0.0854443	9	0.697318	0.0538874	10	0.760989	0.0645742	8	0.421107	0.0832344	5
	280	0.746808	0.0868721	9	0.675798	0.0503088	10	0.736036	0.0461912	8	0.40196	0.0712483	5
	283	0.741345	0.0738929	9	0.662588	0.0549865	10	0.72872	0.0607395	8	0.415894	0.0818543	5
	286	0.726882	0.0782575	9	0.686413	0.0562784	10	0.829353	0.0854627	8	0.380881	0.0789808	5
	289	0.714264	0.0686453	9	0.680563	0.0543964	10	0.773727	0.089099	8	0.420641	0.0973288	5
	292	0.719515	0.0666534	9	0.692271	0.0590423	10	0.801414	0.0838623	8	0.415607	0.0950786	5
	295	0.74189	0.0860578	9	0.688329	0.0558274	10	0.778798	0.0783856	8	0.457583	0.112412	5
	298	0.7344	0.0755368	9	0.686868	0.0589499	10	0.767266	0.0824852	8	0.406673	0.0909176	5
	301	0.730276	0.0778794	9	0.683256	0.0567276	10	0.778993	0.0885175	8	0.409978	0.0898224	5
	304	0.737898	0.0831746	9	0.684142	0.0569812	10	0.810258	0.104124	8	0.464846	0.0936581	5
	307	0.748909	0.085493	9	0.67067	0.0597205	10	0.732696	0.0722422	8	0.416969	0.0863435	5
	310	0.751312	0.0897566	9	0.688903	0.0611274	10	0.777608	0.0996433	8	0.362533	0.0806074	5
	313	0.769111	0.0963996	9	0.680887	0.0604228	10	0.767	0.0770208	8	0.394077	0.10487	5
	316	0.764189	0.0939887	9	0.660261	0.0519823	10	0.791892	0.0951992	8	0.382927	0.0715787	5
	319	0.782257	0.100788	9	0.68108	0.0506796	10	0.727465	0.0775865	8	0.38059	0.0790666	5
	322	0.720245	0.0815598	9	0.670764	0.0505634	10	0.792168	0.105928	8	0.355325	0.0566838	5
	325	0.757322	0.0900123	9	0.681653	0.0507299	10	0.755568	0.086163	8	0.359931	0.0618843	5
	328	0.784316	0.0948661	9	0.691674	0.0561594	10	0.757176	0.0905883	8	0.329011	0.0557093	5
	331	0.769589	0.0874116	9	0.671824	0.050975	10	0.773881	0.102422	8	0.374073	0.0824433	5
	334	0.76749	0.0846787	9	0.676918	0.0549327	10	0.773774	0.0940227	8	0.390094	0.0716393	5
	337	0.785072	0.101373	9	0.683867	0.0532252	10	0.750047	0.0945493	8	0.375527	0.0620134	5
	340	0.769328	0.0876489	9	0.690408	0.0558262	10	0.734537	0.0923937	8	0.329157	0.0879906	5
	343	0.775918	0.0820036	9	0.693128	0.0580877	10	0.730559	0.0761961	8	0.405287	0.0987137	5
	346	0.817102	0.0912423	9	0.681107	0.0561355	10	0.738699	0.0869323	8	0.365175	0.0771924	5
	349	0.773221	0.086101	9	0.701622	0.0592558	10	0.692198	0.0583831	8	0.350127	0.061792	5
	352	0.78261	0.0903894	9	0.690933	0.0582871	10	0.700879	0.0879932	8	0.425442	0.0786968	5
	355	0.743826	0.083397	9	0.69407	0.0581957	10	0.713287	0.087816	8	0.353933	0.0848751	5
	358	0.740083	0.0826941	9	0.690597	0.0515424	10	0.723311	0.0852447	8	0.416427	0.0820468	5
	361	0.747357	0.0871921	9	0.673017	0.0517396	10	0.741823	0.0881308	8	0.354589	0.060133	5
	364	0.763178	0.0828095	9	0.684197	0.0564293	10	0.726644	0.0816173	8	0.396454	0.0693063	5
	367	0.801776	0.0844242	9	0.673154	0.05499	10	0.732788	0.0813179	8	0.406107	0.0708442	5
	370	0.773901	0.0808015	9	0.687511	0.0551765	10	0.704205	0.082866	8	0.437631	0.0725522	5
	373	0.792051	0.0813218	9	0.687271	0.0646959	10	0.694596	0.0578508	8	0.437926	0.0685273	5
	376	0.773581	0.0811927	9	0.690526	0.0655611	10	0.70003	0.0731219	8	0.457985	0.0733972	5
	379	0.792978	0.0819726	9	0.68999	0.0549365	10	0.729476	0.0708359	8	0.488724	0.102921	5
	382	0.792233	0.0844801	9	0.674773	0.0515613	10	0.689849	0.0726315	8	0.383058	0.0719124	5
	385	0.760523	0.0818	9	0.705426	0.0525141	10	0.691262	0.0785306	8	0.428136	0.0749288	5
	388	0.758618	0.0766626	9	0.679818	0.0559844	10	0.64619	0.0772144	8	0.387129	0.0711286	5
	391	0.725321	0.072847	9	0.678908	0.0532526	10	0.680481	0.083627	8	0.378301	0.0686291	5
	394	0.76134	0.0827834	9	0.690199	0.0526857	10	0.688908	0.0647299	8	0.415078	0.064457	5
	397	0.76378	0.0832663	9	0.705565	0.061578	10	0.707631	0.06099	8	0.38558	0.0641475	5
	400	0.721431	0.084476	9	0.678699	0.0579835	10	0.694042	0.0690078	8	0.402601	0.0815511	5
	403	0.773098	0.0752501	9	0.687734	0.0584608	10	0.691363	0.0646675	8	0.401728	0.0703369	5
	406	0.769921	0.0850432	9	0.716644	0.0600067	10	0.686804	0.0676031	8	0.326825	0.0821635	5
	409	0.743593	0.0800972	9	0.672158	0.0520942	10	0.714098	0.0556444	8	0.407674	0.0717111	5
	412	0.730765	0.0799102	9	0.693843	0.0636244	10	0.665369	0.0511648	8	0.383038	0.0843659	5
	415	0.775972	0.0796547	9	0.687274	0.0528115	10	0.700331	0.0737465	8	0.362559	0.0874445	5
	418	0.76786	0.091542	9	0.689159	0.0540391	10	0.627592	0.0388813	8	0.393403	0.100978	5
	421	0.765154	0.0858332	9	0.687706	0.0575498	10	0.68542	0.0595402	8	0.391119	0.0767094	5
	424	0.721683	0.0729054	9	0.675349	0.0488707	10	0.711684	0.0484217	8	0.354241	0.0684028	5
	427	0.788567	0.0890518	9	0.691923	0.0487306	10	0.69846	0.0586656	8	0.480862	0.113571	5
	430	0.778659	0.0784617	9	0.702438	0.050352	10	0.733072	0.0635177	8	0.391525	0.0621855	5
	433	0.771046	0.0743807	9	0.694886	0.0539244	10	0.714577	0.0631588	8	0.385707	0.0651279	5
	436	0.758726	0.0610313	9	0.68193	0.0507686	10	0.720209	0.0642875	8	0.334561	0.034932	4
	439	0.757426	0.0768415	9	0.698882	0.0528429	10	0.728587	0.056524	8	0.330654	0.0609508	4
	442	0.747331	0.0718041	9	0.684919	0.0535541	10	0.683329	0.0512656	8	0.351638	0.0796253	4
	445	0.74877	0.0787728	9	0.684114	0.0498596	10	0.702906	0.0611464	8	0.335562	0.0774303	4
	448	0.763509	0.0753759	9	0.701603	0.0516781	10	0.704335	0.0675912	8	0.311618	0.0424158	4
	451	0.775796	0.0784151	9	0.683897	0.0536297	10	0.689713	0.0669746	8	0.324949	0.0504414	4
	454	0.764548	0.0833187	9	0.689066	0.0527225	10	0.660196	0.0474575	8	0.296611	0.0245588	4
	457	0.740734	0.0764124	9	0.705174	0.0545889	10	0.72078	0.0748188	8	0.365833	0.0703205	4
	460	0.761082	0.0795904	9	0.69896	0.052301	10	0.669215	0.0513032	8	0.314238	0.0770775	4
	463	0.725991	0.0762604	9	0.721055	0.0548814	10	0.718819	0.0702837	8	0.305053	0.0521626	4
	466	0.714501	0.0787078	9	0.720382	0.0554452	10	0.732884	0.0788461	8	0.320143	0.0435514	4
	469	0.717185	0.0709183	9	0.706738	0.0526499	10	0.706378	0.0676425	8	0.308534	0.0463626	4
	472	0.745355	0.0863189	9	0.709251	0.0498353	10	0.746966	0.0692802	8	0.316939	0.0508623	4
	475	0.717804	0.0737262	9	0.709717	0.0591383	10	0.7409	0.0900044	8	0.340849	0.0535093	4
	478	0.704525	0.0797295	9	0.701024	0.0542898	10	0.688791	0.0723091	8	0.314597	0.065273	4
	481	0.73893	0.0757787	9	0.696307	0.0531362	10	0.726143	0.0930791	8	0.280053	0.0435572	4
	484	0.759241	0.0711729	9	0.717159	0.0539079	10	0.73028	0.0659535	8	0.316241	0.0659482	3
	487	0.727586	0.0654363	9	0.719334	0.06134	10	0.702553	0.0578454	8	0.325227	0.0910651	3
	490	0.775282	0.0758892	9	0.731941	0.0599592	10	0.668958	0.0605594	8	0.306307	0.0398783	3
	493	0.76113	0.0791781	9	0.732158	0.0554871	10	0.635782	0.0457791	8	0.340543	0.0765967	3
	496	0.767434	0.0902756	9	0.719505	0.0564873	10	0.62551	0.0330964	8	0.328393	0.0659801	3
	499	0.763386	0.0755483	9	0.705506	0.0578993	10	0.716557	0.0642706	8	0.351258	0.0852436	3
	502	0.756495	0.0718807	9	0.695237	0.0618888	10	0.687823	0.0617132	8	0.343142	0.0824634	3
	505	0.750654	0.0639027	9	0.706499	0.0612997	10	0.672478	0.0255709	8	0.344771	0.0822432	3
	508	0.748915	0.0670764	9	0.717012	0.0595892	10	0.682666	0.0454078	8	0.329693	0.0704514	3
	511	0.76713	0.069761	9	0.711631	0.0661505	10	0.668576	0.0465924	8	0.356642	0.118327	3
	514	0.749812	0.0746913	9	0.698113	0.0635741	10	0.676163	0.0445925	8	0.341668	0.0878426	3
	517	0.760854	0.0640528	9	0.715478	0.0658038	10	0.607916	0.0236797	8	0.343308	0.0242674	3
	520	0.757681	0.080916	9	0.706477	0.0579228	10	0.696483	0.0559036	7	0.313154	0.0586902	3
	523	0.746564	0.0730358	9	0.702206	0.055271	10	0.681186	0.0653254	7	0.360677	0.0864416	3
	526	0.737406	0.0696043	9	0.692639	0.0498049	10	0.672667	0.0516168	7	0.35749	0.0797962	3
	529	0.739896	0.0775745	9	0.713692	0.0531365	10	0.61535	0.0489483	7	0.324836	0.0670274	3
	532	0.743714	0.0624916	9	0.724165	0.0570503	10	0.655903	0.065888	7	0.301122	0.0881353	3
	535	0.791622	0.0876112	9	0.742322	0.0682563	10	0.639309	0.0678913	7	0.320955	0.0623572	3
	538	0.775783	0.0719441	9	0.705061	0.0603454	10	0.680804	0.052505	7	0.28787	0.0500788	3
	541	0.767195	0.0774142	9	0.708252	0.0554847	10	0.658471	0.0530813	7	0.312157	0.0266831	3
	544	0.769339	0.084025	9	0.713662	0.0579585	10	0.639284	0.0503066	7	0.339364	0.0540985	3
	547	0.765388	0.0801753	9	0.721684	0.0576321	10	0.667445	0.0788147	7	0.351124	0.0949777	3
	550	0.767828	0.0743201	9	0.691619	0.0535432	10	0.735666	0.0931409	7	0.297638	0.0733553	3
	553	0.757299	0.0761106	9	0.717185	0.0633442	10	0.661172	0.0704035	7	0.294536	0.0577366	3
	556	0.729722	0.0796026	9	0.709171	0.0543783	10	0.659856	0.0693483	7	0.347524	0.0577712	3
	559	0.729866	0.0814794	9	0.724229	0.0634129	10	0.666053	0.0570635	7	0.330999	0.0925088	3
	562	0.714388	0.0823146	9	0.724296	0.065207	10	0.727664	0.0909342	7	0.349038	0.104418	3
	565	0.740503	0.0691659	9	0.725214	0.0611446	10	0.709241	0.074035	7	0.296792	0.0676761	3
	568	0.723273	0.0825302	9	0.730476	0.0662872	10	0.646991	0.0837387	7	0.347931	0.0691709	3
	571	0.754138	0.08312	9	0.705692	0.055765	10	0.671379	0.0650008	7	0.331819	0.100527	3
	574	0.753224	0.0800035	9	0.716178	0.0648552	10	0.693265	0.0655397	7	0.326129	0.0745178	3
	577	0.722543	0.0685779	9	0.715202	0.0605077	10	0.707265	0.061148	7	0.349559	0.0953523	3
	580	0.706425	0.0808836	9	0.729112	0.0626505	10	0.724831	0.0577573	7	0.344619	0.0642873	3
	583	0.705225	0.0716602	9	0.725838	0.0636551	10	0.698791	0.0581305	7	0.301746	0.0703743	3
	586	0.712519	0.0838635	9	0.726829	0.0643868	10	0.722728	0.0566899	7	0.309428	0.0471145	3
	589	0.748302	0.0817286	9	0.721532	0.0633871	10	0.720022	0.0591752	7	0.311042	0.0375334	3
	592	0.750795	0.0827951	9	0.717413	0.0669484	10	0.733211	0.0632962	7	0.353879	0.0638365	3
	595	0.75075	0.0811898	9	0.72656	0.0738678	10	0.735572	0.0909919	7	0.358339	0.0841626	3
	598	0.750099	0.0844913	9	0.722305	0.0740138	10	0.743593	0.0796959	7	0.317443	0.0651878	3
	601	0.753179	0.0815385	9	0.721926	0.0755924	10	0.689364	0.0782472	7	0.360756	0.0702771	3
	604	0.767272	0.0783522	9	0.696603	0.0687333	10	0.787537	0.0809821	7	0.334236	0.0951085	3
	607	0.808521	0.0987436	9	0.691319	0.0639036	10	0.770304	0.0759464	7	0.346216	0.0903686	3
	610	0.772999	0.0744666	9	0.715015	0.0747203	10	0.732631	0.0933644	7	0.349742	0.0942364	3
	613	0.796224	0.0906171	9	0.696444	0.0702817	10	0.668616	0.0426233	7	0.331087	0.0741932	3
	616	0.759858	0.087521	9	0.692518	0.0681929	10	0.66888	0.0423112	7	0.341251	0.0767909	3
	619	0.767675	0.0756047	9	0.725761	0.0718367	10	0.771341	0.0973869	7	0.32304	0.0930295	3
	622	0.765802	0.0925218	9	0.727984	0.0713325	10	0.700903	0.0590115	7
	625	0.783311	0.099173	9	0.70685	0.0692015	10	0.779488	0.113969	7
	628	0.759869	0.0862926	9	0.740742	0.079249	10	0.770103	0.112818	7
	631	0.776103	0.0995029	9	0.728796	0.0676815	10	0.729291	0.0467344	7
	634	0.780177	0.108425	9	0.720731	0.0739483	10	0.70225	0.05821	7
	637	0.786582	0.104731	9	0.714047	0.0695782	10	0.699669	0.0828358	7
	640	1.00753	0	1	0.713179	0.0656225	10	0.59563	0.0006543	3
