# Supplementary material for: Engineering paralog-specific PSD-95 recombinant binders as minimally interfering multimodal probes for advanced imaging techniques
Source: eLife. 2024 Jan 3;13:e69620. doi: 10.7554/eLife.69620 (PMC10803022; doi:10.7554/eLife.69620)
Supplement: Figure 3—source data 5. [file elife-69620-fig3-data5.xlsx]

## Sheet: Fig3g
Fig 3g	Spreadsheet with the mobile fraction extracted from the fluorescence recovery data
	Mobile fraction (normalized)
	Xph15			Xph20			Xph18			PSD-95-EGFP
	Mean	SEM	N	Mean	SEM	N	Mean	SEM	N	Mean	SEM	N
	0.7468	0.005066	2203	0.7069	0.005404	2810	0.7588	0.006906	2521	0.3695	0.006383	997
