# Supplementary material for: Engineering paralog-specific PSD-95 recombinant binders as minimally interfering multimodal probes for advanced imaging techniques
Source: eLife. 2024 Jan 3;13:e69620. doi: 10.7554/eLife.69620 (PMC10803022; doi:10.7554/eLife.69620)
Supplement: Figure 4—source data 1. [file elife-69620-fig4-data1.xlsx]

## Sheet: Fig4b
Fig 4b	Spreadsheet with the normalized object average intensity data
	Normalized object average intensity
	Xph20				Xph15
	Cy5 Control	GFP Control	Cy5 Sh	GFP Sh	Cy5 Control	GFP Control	Cy5 Sh	GFP Sh
	0.819057	0.691521	1.35845	0.525189
	1.76396	1.2444	1.30936	0.594795
	0.57916	0.2989	1.26702	0.124302
	0.877699	0.775584	1.16864	0.382306
	0.658967	0.702806	1.4031	0.520339
	0.945371	1.03142	0.803645	0.980035
	0.877356	0.730397	0.571806	1.90815
	1.15315	1.11691	0.705115	2.03536
	0.865049	0.999944	0.304055	0.172094
	1.04939	1.05505	0.47354	0.0730799
	0.802	0.658436	0.493571	0.154931
	0.767444	0.708821	0.416193	0.0980153
	1.53259	0.294142	0.227701	0.0957741
	0.779286	0.726882	0.806108	0.11549
	2.41425	1.02339	0.508638	0.103888
	1.21451	0.901975	0.565901	0.077595
	1.27619	0.9977	0.434376	0.0903601
	1.1287	1.01581	0.32841	0.0841523
	0.958774	0.91799	1.10681	0.136729
	0.987132	0.998773	0.882554	0.131831
	1.32381	1.45442	1.09815	0.13395
	0.781803	0.573886	0	0.0691436
	0.733507	0.681698	1.27313	0.120024
	1.23587	0.844456
	1.61679	1.09513
	1.22706	1.84094
	1.00012	1.43778
	1.15148	1.27229
	1.09363	2.22579
	1.53252	1.85791
	1.29466	2.45105
	1.80858	1.07063
	1.74276	0.696048
	0.455527	1.45819
	0.401696	1.24315
	0.425402	1.19547
	0.25626	0.685761
	1.55454	0.726262	0.781003	0.190509	0.767509	1.11829	0.206735	0.177094
	1.5326	0.897805	0.588102	0.136817	0.818155	1.00128	0.829557	0.104034
	0.943764	0.945167	0.881901	0.0939641	0.651093	0.803448	0.762911	0.23903
	0.981184	1.0888	1.01373	0.110998	0.683888	0.895039	0.487199	0.20472
	1.1165	1.38062	0.399659	0.136341	0.930006	0.9385	0.528705	0.179003
	1.57214	1.47944	0.55787	0.127386	1.37425	2.96692	0.64024	0.131877
	1.44422	1.24599	0.646286	0.176059	1.69239	3.21149	0.775126	0.257417
	1.29596	0.807333	0.845456	0.169109	0.996186	2.83289	0.388121	0.372562
	1.30161	1.29889	0.483352	0.108085	0.806612	2.32848	0.369142	0.313558
	1.00327	1.05399	0.122353	0.994704	1.63438	3.4461	0.486622	0.203572
	1.00019	1.56169	0.305963	0.911821	1.35242	0.527728	0.54528	0.170154
	1.05884	1.56964	0.508374	1.56048	1.46145	0.880216	0.414952	0.174268
	0.863407	1.55885	0.252852	0.0975354	1.24151	0.865181
	1.09937	1.50391	0.532892	0.0749172	1.02371	0.461994
	0.537952	0.525097	0.206178	0.139124	1.58843	0.600471
	0.659206	0.600207	0.0813003	0.330482	0.817225	0.476879	0.141489	1.01065
	0.628581	0.740403	0.106772	0.657143	1.00476	0.457093	0.200945	1.18665
	0.614914	0.625153	0.129646	0.724673	0.713128	0.418063	0.276339	2.07933
	0.56771	0.726826	0.0803416	0.312915	1.43995	0.602315	0.203122	0.66765
	0.574968	0.639244	0.528098	0.166378	0.832942	4.27944	0.340219	1.30388
	0.989177	0.391373	0.210599	0.118295	1.09385	4.84423	0.441288	1.17405
	0.934794	0.390775	0.407034	1.25701	1.04104	4.91493
	0.614333	0.351866	0.800312	0.205286	0.843489	0.463976
	1.45304	0.600765			0.532159	0.55305
	1.4315	1.38386			0.495034	0.304801
	0.952816	1.07844			1.42415	1.36265
	0.761806	1.06079			1.00385	0.99868
	0.999605	1.13926			1.10341	1.49912
	1.28859	0.700904			0.957394	1.61047
	1.47503	1.61458			0.991194	1.40721
					0.979815	1.48538
					1.67365	1.50298
	1.98406	1.37147	0.75788	0.915033	0.57649	0.766494	0.929305	0.518213
	1.33926	1.21977	0.792823	0.563656	0.663563	0.68956	0.43604	2.06511
	1.8326	1.08762	1.17335	1.23107	0.464578	0.695383	1.75306	2.33832
	1.18654	0.934971	0.705212	0.237188	0.452738	0.47893	0.348816	1.62975
	0.988479	0.631392	2.2094	0.165135	0.493616	0.300312	0.678324	0.781986
	0.716159	0.464824	1.70685	0.264881	1.16327	0.454779	1.23877	0.627357
	0.420858	0.329168	0.896004	0.279109	0.977264	0.322126	0.490812	0.543522
	0.550127	0.440497	1.14875	0.288972	0.883806	0.32205	0.493469	0.384718
	1.06648	0.412086	1.09841	0.13958	0.572016	0.228408	0.970148	0.144723
	0.933519	0.422826	0.574892	0.911655	0.759779	2.45632	0.670794	0.136679
	1.01114	1.44724	0.932029	1.89408	0.735998	2.69496	0.223844	0.194995
	0.958022	0.976505	1.55792	0.249224	1.25566	2.53026	0.296216	0.384312
	0.676828	0.970426	1.63132	0.187214	0.846756	2.6972	1.06089	0.197093
	0.778097	1.19181	0.84371	0.355686	0.885519	0.70941	0.3563	0.27085
	1.26559	1.18468	0.888958	0.248513	1.37172	1.02364	0.453315	0.966526
	1.13601	1.19129	0.919718	0.238334	0.842269	0.79578	0.775898	0.19549
	0.889544	0.938137	0.862962	0.285116	0.560628	0.914972	1.08714	0.159197
	1.0781	1.02291	1.20298	0.12424	0.907985	1.70984	0.612092	0.151866
	1.07971	1.27582	0.574928	0.338435	0.716514	0.976366	1.71296	0.160161
	0.598899	1.19884	1.23513	0.133887	1.02273	1.78836	0.550385	0.28959
	0.465486	0.80132	0.829525	0.609574	1.74107	1.43794	0.494408	0.144507
	1.09265	1.20528	0.985298	0.268555	2.7507	1.56953	0.185189	0.193681
			0.764983	0.755521	1.77943	1.71628	0.378016	0.0779911
			0.292696	0.966047	0.916905	1.58608	0.878184	0.153092
			1.5694	0.203589	1.89727	0.349789	0.817167	0.304211
			4.37308	0.447526	1.14182	0.381127	0.229783	0.0929758
			0.770952	0.293335	1.12164	0.36677	0.29326	0.145967
			3.04681	0.303987	1.4043	0.875082	0.497362	0.115342
			0.223819	0.288663	1.33601	0.895974	0.619367	0.325981
			0.661099	0.315023	1.35784	2.085
			0.689145	0.427917	1.10452	2.07561
			0.704422	0.604692	1.3521	2.07547
			1.25764	0.755315	0.713845	3.55014
			0.798399	0.566597	1.6083	1.16974
					2.27333	1.48638
					1.84385	1.47109
	1.2283	1.53181	0.638988	0.302413	1.17093	1.2361	0.547618	0.260115
	0.460528	0.320269	0.253949	0.312351	0.729021	1.61483	0.408555	0.144003
	1.05083	1.15327	0.10176	0.174632	0.65996	1.43542	0.34418	0.233567
	0.928411	0.947898	1.64676	0.28111	1.18316	2.05255	0.351459	0.182977
	1.14155	1.24625	0.599806	0.368845	1.32962	0.958492	0.479537	0.292199
	0.999816	0.94744	0.649809	1.34359	0.911332	0.548881	0.522619	0.425919
	1.04876	0.878844	0.7424	1.43446	1.00005	0.450228	1.07735	0.290488
	1.1806	1.23512	1.79246	1.12388	1.17005	0.613803	0.658006	0.233378
	1.49391	0.997741	1.15215	0.100491	1.04886	0.609187	0.448786	3.76567
	0.691003	1.68326	0.632226	0.0871169	1.22743	0.668806	0.35236	2.72715
	0.778825	1.13093	0.682087	1.17567	1.38361	0.565497	0.73129	1.61457
	0.770611	1.10083	0.190544	0.778446	0.900556	1.48522
	0.634134	1.59738	0.578228	0.275557	1.06998	2.03183
	1.13668	1.1042	0.467201	0.222737	0.737155	1.66473
	1.2523	1.09267	0.204252	0.252021	0.696674	0.843596
	1.18331	0.720936	0.406937	0.301726	0.928117	0.816831
	1.2569	1.17716	0.755898	0.25038	0.762588	0.556915
	1.2274	1.31768	1.1227	0.237694	1.27307	0.928742
	0.863209	1.12908	0.530274	0.30093	0.930097	0.80954
	0.925242	1.00242	0.503984	0.125284	0.769137	1.17855
	0.699614	0.698856	0.679066	0.117285	0.971754	0.999868
	0.529574	0.563152	0.473481	0.425727	2.80227	1.67372
	1.07121	0.761371	0.291048	0.301097	1.20293	1.79205
	0.944867	0.644723	0.510788	0.392276	0.791474	1.12709
	0.611807	0.597025			1.17785	1.0362
	1.00863	0.488957
	1.00023	0.572809
	0.550786	0.375094
