# Supplementary material for: Engineering paralog-specific PSD-95 recombinant binders as minimally interfering multimodal probes for advanced imaging techniques
Source: eLife. 2024 Jan 3;13:e69620. doi: 10.7554/eLife.69620 (PMC10803022; doi:10.7554/eLife.69620)
Supplement: Figure 4—source data 4. [file elife-69620-fig4-data4.xlsx]

## Sheet: Fig4f
Fig 4f	Spreadsheet with the normalized fluorescence intensity data
	Xph20-GFP	PSD-95-mScarlet
	1.3979	1.40604
	1.4166	1.42659
	0.961432	1.1293
	1.55531	1.7092
	1.14367	1.18895
	1.46203	1.5904
	1.26463	1.21591
	0.963656	1.13856
	0.787991	0.62544
	1.19241	1.36264
	1.47671	1.55647
	0.695076	0.630187
	0.714827	0.659196
	0.704143	0.578043
	0.692477	0.665898
	1.58819	1.5933
	0.98302	1.01743
	1.1069	1.08522
	1.14025	1.13569
	1.4408	1.62172
	1.31623	1.39683
	0.816418	0.826753
	1.14551	1.15364
	0.686539	0.636678
	0.696267	0.677821
	0.67423	0.713067
	1.43712	1.49812
	0.680517	0.617133
	1.3593	1.41322
	1.49489	1.70858
	1.03987	1.04819
	1.32598	1.45223
	1.25	1.28147
	1.24309	1.43887
	1.19655	1.23089
	1.19974	1.17872
	0.806058	0.858243
	0.715029	0.592648
	0.734422	0.724933
	0.726643	0.691055
	1.08755	1.17071
	1.21173	1.07141
	0.73796	0.626417
	1.00809	0.983169
	1.40675	1.43146
	0.658049	0.573157
	0.727158	0.633052
	0.703679	0.564199
	0.716187	0.635212
	0.715446	0.613843
	1.2796	1.25516
	0.677803	0
	1.43156	1.50374
	0.913373	0.873045
	1.27288	1.30741
	0.793686	0.883079
	1.51213	1.60493
	0.64981	0
	1.05981	1.18195
	0.692098	0.84847
	0.964849	0.968773
	1.11597	1.24198
	0.702521	0.544328
	0.877207	0.85823
	0.782432	0.628127
	0.715625	0.67714
	0.708775	0.671045
	1.35928	1.44846
	0.716082	0.629453
	0.895471	1.00433
	1.05356	1.15469
	1.02379	1.04915
	0.690708	0.570714
	0.702521	0.56485
	0.870959	1.06765
	0.705996	0.533578
	1.41436	1.45265
	1.22864	1.35223
	0.693024	0.580486
	0.699047	0.624463
	1.37915	1.46808
	1.13758	1.31299
	0.689716	0.658666
	1.20012	1.19283
	0.811757	0.762466
	1.11012	1.15923
	1.36585	1.54796
	0.699245	0.54726
	1.30747	1.46046
	0.701548	0.732286
	1.39572	1.66885
	1.14692	1.14897
	1.26296	1.46418
	1.44352	1.61092
	0.977171	1.04248
	1.2546	1.19548
	0.735094	0.597476
	0.697935	0.646451
	1.20767	1.20809
	1.45815	1.61328
	0.967046	1.19565
	1.47458	1.56726
	1.3087	1.43195
	0.836946	0.965089
	0.696909	0.62759
	0.803026	0.831709
	1.22728	1.35888
	0.687532	0.603801
	0.705023	0.62383
	1.12362	1.07585
	1.0189	1.01044
	0.919062	0.966012
	1.3935	1.38033
	0.703216	0.538465
	1.23098	1.205
	1.12813	1.17917
	0.813095	0.85048
	1.18535	1.25865
	0.989307	0.975619
	1.01436	0.985324
	1.27537	1.3124
	0.794055	0.83594
	1.04688	1.05293
	1.31681	1.33467
	0.903148	0.816824
	0.690582	0.535533
	0.75801	0.687603
	0.954891	0.888993
	0.832716	0.871367
	0.68098	0.549214
	0.708601	0.760807
	0.68912	0.605895
	0.976668	0.942399
	0.671252	0.552146
	0.939493	0.914624
	0.692098	0.558987
	0.707212	0.60824
	0.661523	0.549866
	1.08318	1.09404
	1.09429	1.06455
	1.04466	0.830547
	1.38853	1.48086
	0.767115	0.57449
	1.47087	1.5544
	0.722173	0.713194
	1.13525	1.11715
	1.07499	0.959645
	0.880543	0.766193
	0.96209	0.985476
	0.790227	0.804681
	1.23817	1.38757
	1.34152	1.49755
	0.682945	0.64876
	0.918988	0.803066
	0.712138	0.747593
	1.32878	1.45787
	1.12559	1.26759
	0.934236	0.99118
	1.40188	1.44032
	0.82163	0.846939
	0.942407	0.884472
	1.22012	1.1937
	1.08664	1.08475
	1.05762	1.22628
	1.19248	1.19905
	1.26527	1.31092
	1.24852	1.36128
	0.780509	0.573841
	1.12781	1.05757
	1.08754	1.18363
	1.13308	1.19678
	0.915828	0.795063
	1.34859	1.35295
	1.38807	1.3338
	1.06363	1.01135
	0.734764	0.71778
	1.28336	1.43752
	0.995341	0.990667
	1.29397	1.46342
	1.18151	1.33582
	1.19637	1.27224
	0.86684	0.930414
	1.06125	1.04993
	1.17654	1.27435
	1.07938	1.075
	1.09025	1.16347
	1.24722	1.21327
	0.919718	0.978188
	1.19151	1.25989
	1.3584	1.40816
	1.35571	1.3117
	0.92551	0.92342
	1.10629	1.14376
	1.25984	1.27498
	0.862021	0.794206
	1.06657	0.990537
	0.936616	0.854421
	1.32104	1.34496
	1.39222	1.35968
	1.35524	1.50964
	0.62186	0.588108
	1.23932	1.2206
	1.27907	1.33902
	0.768637	0.763705
	1.10314	1.08376
	1.14986	1.18878
	0.579598	0.504885
	1.19437	1.25004
	1.24104	1.21881
	0.83855	0.740431
	1.15204	1.20089
	0.853023	0.944626
	0.966334	1.03554
	0.881472	0.674231
	0.795964	0.746904
	1.28257	1.36316
	1.05231	1.092
	0.841603	0.826176
	0.762616	0.720018
	0.82311	0.716669
	0.893648	0.806145
	1.15872	1.23157
	1.15319	1.20756
	0.929649	0.916443
	1.2483	1.23829
	0.949976	0.916574
	1.33193	1.43969
	0.903269	0.97996
	0.677263	0.624508
	0.761006	0.668069
	1.20821	1.42377
	0.903491	0.66316
	0.918585	0.885441
	1.08397	0.983718
	1.0687	1.09506
	0.934084	0.74982
	0.948879	1.07262
	1.37133	1.36983
	1.38184	1.48775
	0.720058	0.789776
	1.16027	1.22381
	0.807388	0.905414
	0.847632	0.768028
	0.626477	0.549199
	1.121	1.11001
	1.07156	1.10379
	0.802972	0.734177
	1.22152	1.35499
	1.06881	1.0591
	1.01926	1.03516
	1.29719	1.47766
	1.33719	1.4051
	1.26574	1.46649
	0.973943	0.898491
	1.18896	1.22158
	0.979049	0.984598
	0.786785	0.79925
	0.859624	0.922704
	0.89499	0.869636
	0.983317	0.992738
	1.12819	1.16068
	0.799991	0.649643
	0.970943	1.14102
	1.13018	1.09383
	0.718475	0.686923
	1.18509	1.15527
	0.575008	0.556248
	0.692801	0.584073
	1.28413	1.29473
	0.576339	0.456843
	1.15557	1.10765
	1.11813	1.14041
	0.769113	0.760417
	0.600118	0.541107
	1.12898	1.19963
	0.797784	0.804992
	1.31588	1.31993
	0.801919	0.766435
	1.46708	1.53056
	1.19452	1.10869
	0.900443	0.869304
	1.1352	1.16448
	0.957615	0.936824
	0.581303	0.538601
	0.888083	0.972369
	1.11064	1.18558
	1.33948	1.41239
	0.572292	0.501898
	1.31184	1.26854
	1.03995	0.983077
	0.574803	0.513918
	1.05926	1.11572
	0.587411	0.539687
	1.24765	1.28543
	0.668181	0.610877
	0.788908	0.810629
	0.811044	0.732671
	1.43582	1.45108
	0.571607	0.526574
	1.19654	1.29703
	1.0626	1.02369
	0.579243	0.508248
	0.574271	0.4721
	1.0629	1.02603
	0.865402	0.878927
	0.771039	0.719325
	0.902426	0.928152
	1.08213	1.15402
	0.787639	0.821451
	0.957334	0.946097
	1.00894	1.04998
	0.57488	0.501427
	0.880673	0.868208
	0.808845	0.756487
	0.970578	0.89699
	1.37432	1.38865
	0.846756	0.665404
	0.770098	0.676173
	1.19979	1.16235
	1.2561	1.26979
	0.655777	0.671079
	0.749358	0.772795
	1.04404	1.30345
	1.11303	1.15159
	0.781724	0.698986
	1.1881	1.3454
	0.802667	0.801797
	0.932613	0.83234
	0.601726	0.624346
	1.09389	1.10002
	1.15537	1.12391
	0.700946	0.681445
	0.695883	0.671115
	0.763453	0.76937
	0.573205	0.545656
	1.14513	1.17909
	1.06365	1.08049
	0.679045	0.774235
	1.24198	1.46944
	1.11296	1.06044
	0.596645	0.444486
	0.712334	0.681791
	1.2213	1.33759
	1.17777	1.18963
	1.14157	1.20197
	0.586599	0.526718
	1.25757	1.36209
	0.713266	0.690056
	0.889843	0.976948
	0.605467	0.542653
	1.09789	1.08821
	0.962579	0.928714
	0.849024	0.8515
	0.642307	0.561376
	0.666355	0.732361
	0.937456	1.04511
	1.07019	0.992389
	1.08881	1.09784
	0.809129	0.713413
	0.711594	0.624648
	1.28793	1.25035
	1.12277	1.19826
	0.925104	0.887854
	0.67016	0.624045
	1.13834	1.13227
	0.919007	0.984466
	0.696335	0.636338
	0.806962	1.00644
	0.917279	0.90836
	0.986247	1.06171
	1.27615	1.29167
	1.10889	1.00437
	1.11558	0.884953
	0.960798	0.937225
	1.10268	1.02103
	1.37125	1.36889
	1.25776	1.17972
	0.784872	0.646976
	0.99846	0.904584
	1.18092	1.18308
	1.28682	1.26238
	1.0249	1.01488
	1.29848	1.28321
	1.17739	1.16966
	1.12214	1.02434
	0.987728	0.922513
	0.815726	1.00359
	1.06435	1.03853
	0.904727	0.965322
	0.753196	0.921513
	0.689208	1.00938
	0.961643	1.01715
	0.784884	0.834729
	0.759693	0.771702
	0.698262	0.67445
	0.804151	0.778372
	0.888567	1.06623
	0.920107	1.10686
	0.887222	0.835298
	0.931306	0.937779
	1.06805	1.03683
	0.792541	0.77947
	1.27336	1.46247
	0.864138	0.852024
	0.928878	0.962399
	0.923882	1.04967
	0.890338	1.00649
	0.990877	1.03418
	0.87366	0.980994
	0.806392	0.734554
	1.01054	1.11437
	0.725689	0.881813
	0.782995	0.78827
	1.31539	1.46771
	0.814132	1.00148
	0.826016	0.768277
	0.712027	0.664557
	1.17324	1.51081
	0.869343	0.908972
	0.924995	0.936483
	0.950184	0.995837
	0.745249	0.651771
	0.830908	0.854511
	0.792695	0.913979
	0.91045	0.852343
	1.3413	1.47891
	1.11342	1.04296
	1.06746	1.11186
	0.986812	0.96345
	1.1572	1.1432
	1.27945	1.51787
	1.26168	1.27106
	1.30301	1.35025
	0.933584	0.95533
	0.912847	0.871779
	0.989025	0.956787
	0.709504	0.722686
	0.897783	0.922056
	0.827211	0.818354
	0.689321	0.64717
	1.08356	1.26487
	1.11918	1.13082
	0.861032	0.844823
	1.16429	1.23288
	1.00097	1.04811
	1.07519	0.983737
	0.983187	0.844475
	1.26638	1.26905
	1.27433	1.29598
	1.08196	1.06157
	1.01459	0.932211
	0.98016	1.09007
	0.781124	0.683583
	1.34089	1.23439
	0.884235	0.89641
	0.78792	0.633501
	1.15444	1.15403
	1.14158	1.09807
	1.0438	1.10795
	1.09751	1.03834
	1.30355	1.30313
	0.877903	0.834868
	0.895754	0.826777
	1.03175	0.99048
	1.02646	1.02305
	0.882082	0.746458
	1.0321	1.00305
	1.25026	1.35624
	0.722185	0.726347
	0.78154	0.718724
	1.26431	1.24488
	1.24004	1.16617
	1.39092	1.36247
	0.902576	0.842492
	1.22575	1.21346
	1.12228	1.08454
	0.863756	0.843267
	0.998501	1.04781
	1.20705	1.05171
	1.15424	1.18256
	1.13072	0.9843
	1.27324	1.24557
	1.2552	1.21277
	1.20441	1.06422
	1.03801	0.921014
	1.0162	0.890783
	0.793347	0.710691
	1.03266	0.928877
	1.06004	1.00892
	1.19082	1.14594
	0.804917	0.61222
	0.743601	0.558609
	0.890596	0.795953
	0.962336	0.967651
	0.832767	0.812263
	0.824404	0.777716
	1.32173	1.26532
	1.17228	1.09427
	1.15373	0.987915
	1.25042	1.21705
	1.50108	1.3846
	1.18489	1.07953
	1.0974	1.11986
	0.886563	0.596274
	0.736307	0.724163
	0.990776	0.832159
	0.909392	0.770666
	1.18517	1.02689
	1.28414	1.41036
	0.970323	1.24777
	0.918529	1.04278
	0.779096	0.723737
	0.68745	0.73166
	1.23652	1.32652
	0.87285	0.972758
	1.23936	1.39745
	0.727016	0.817012
	0.671473	0.627661
	1.66928	1.66645
	1.23703	1.23803
	0.706033	0.74549
	1.1669	1.33412
	0.977587	1.02967
	1.20887	1.33352
	0.870931	0.847657
	0.971469	0.938414
	0.978655	1.07766
	1.10896	1.15143
	1.33464	1.49362
	1.00692	1.01381
	0.744867	0.715419
	1.41467	1.57397
	0.658984	0.637921
	1.01052	1.08992
	1.16449	1.25117
	0.983963	1.04033
	1.35181	1.52017
	1.30359	1.40458
	0.966249	1.0314
	0.925946	0.882116
	0.565039	0.664758
	1.3711	1.45095
	1.15173	1.15377
	0.875667	0.921565
	0.786999	0.799573
	0.95833	1.0257
	1.21119	1.23757
	1.19129	1.10964
	1.36963	1.37034
	0.803414	0.817454
	0.67544	0.683334
	1.00843	1.0009
	0.808364	0.849183
	0.977515	1.02078
	1.47002	1.47584
	0.992567	0.949786
	0.580847	0.51854
	1.0403	1.08228
	1.1877	1.16163
	0.680555	0.612985
	0.911165	0.966771
	1.38349	1.30193
	1.0583	1.05773
	1.11961	1.07146
	0.91074	0.81796
	1.152	0.979221
	0.841084	0.879769
	0.598787	0.63253
	0.843141	0.875025
	0.862992	0.806845
	0.965026	1.03628
	0.975597	0.935192
	0.792037	0.795186
	1.10706	1.02408
	1.04859	0.860524
	1.02854	0.968618
	0.931809	0.779827
	1.3274	1.26983
	0.66573	0.583773
	1.2029	1.10505
	0.575101	0.460636
	0.779512	0.649691
	0.636083	0.529397
	1.42713	1.33917
	1.07962	1.11051
	0.907337	1.06789
	0.68323	0.80437
	1.13747	1.30864
	1.06803	1.18637
	1.24705	1.36639
	0.978832	0.809702
	0.950252	0.822516
	0.753332	0.683291
	0.584358	0.676368
	1.25042	1.42492
	1.25394	1.25268
	1.10437	1.03703
	1.3526	1.41317
	0.962319	0.917624
	0.717691	0.489526
	1.06276	1.19763
	1.02597	1.07878
	1.03846	1.0949
	1.04696	1.17813
	1.09426	1.17151
	1.33027	1.27212
	0.850312	0.901319
	0.899138	0.967724
	1.01376	1.05095
	1.05797	0.982004
	1.04363	1.05557
	1.06825	1.16592
	1.03069	1.28341
	0.606677	0.350655
	0.882149	0.912776
	0.921759	0.966066
	1.14089	1.10859
	0.881451	1.00461
	0.729322	0.60778
	0.698451	0.70993
	1.01727	1.19126
	1.53682	1.52982
	0.656289	0.587218
	1.1814	1.12823
	0.989412	1.06963
	1.14	1.03777
	0.877994	1.00376
	1.35438	1.2892
	1.06582	1.19967
	1.11805	1.25018
	0.78222	0.804311
	0.819891	0.724066
	1.05406	0.951395
	1.41752	1.35439
	1.09243	1.1404
	0.977717	0.807691
	1.06793	1.16551
	1.00225	0.813362
	0.806756	0.704796
	0.77134	0.889628
	0.70422	0.619086
	0.898196	0.745248
	1.1227	1.07717
	1.13097	1.2936
	1.2248	1.07721
	1.08673	0.929716
	0.989636	0.97875
	1.12197	1.11426
	0.581333	0
	1.03762	1.032
	1.32106	1.24271
	1.13507	1.18326
	0.849728	0.823138
	1.17968	1.25674
	1.23007	1.28185
	1.16408	1.0337
	1.09439	1.0825
	1.31135	1.4281
	0.817052	0.596975
	1.00221	1.0792
	1.18567	1.15218
	1.03005	0.955631
	0.766538	0.609858
	0.909544	0.805009
	0.832081	0.724393
	1.17333	1.0285
	1.13635	1.10135
	1.02629	0.982871
	1.41149	1.44841
	1.42115	1.34403
	0.884426	0.752816
	0.95166	0.935384
	1.15648	1.26499
	0.962224	0.921156
	1.15551	1.34094
	0.914353	1.06886
	1.29491	1.34971
	1.02602	1.09414
	0.709813	0.84831
	0.875972	0.938656
	1.22718	1.29317
	1.33311	1.22633
	1.02976	1.13877
	1.31503	1.47735
	1.17114	1.20632
	0.812501	0.705333
	1.44302	1.34089
	0.94274	1.02357
	1.0258	1.06528
	1.12945	1.20349
	1.0458	1.03332
	0.903773	0.882148
	1.05338	1.0547
	0.92971	0.82414
	1.17764	1.09432
	0.688804	0.524865
	1.0048	0.947946
	1.26531	1.07329
	0.606589	0.547078
	0.813759	0.709624
	1.07272	1.02751
	1.20659	1.07538
	1.13013	1.14635
	0.915189	0.854464
	1.06571	1.05878
	1.18621	1.33795
	1.21576	1.3072
	0.931024	1.03453
	1.36638	1.36463
	1.37227	1.31098
	1.37111	1.45463
	1.07395	1.08052
	1.32021	1.14964
	0.822738	0.619597
	1.07771	1.19574
	0.617672	0.667921
	0.92941	0.863404
	0.685802	0.623871
	1.37025	1.22525
	1.11055	1.05248
	0.770483	0.715581
	1.20595	1.20092
	1.18368	1.28592
	0.890029	0.786215
	1.05548	1.04598
	0.982147	0.946063
	0.679299	0.662199
	0.943845	0.845077
	1.01587	0.987078
	0.898771	1.08543
	0.862318	0.711367
	1.0019	1.01326
	1.18838	1.12258
	1.26609	1.14425
	0.917991	0.880857
	0.860029	0.742845
	0.962281	0.922979
	0.820907	0.85501
	1.39726	1.43527
	0.833117	0.866245
	0.988579	0.982747
	1.03288	0.929652
	1.09844	1.15848
	1.13328	1.21399
	0.826944	0.859611
	1.21258	1.22123
	1.18895	1.15868
	0.833082	0.958147
	1.12305	1.0817
	1.11291	1.05716
	0.639282	0.636658
	0.792811	0.881683
	1.1148	1.14188
	0.89702	0.971509
	0.934977	0.949777
	1.01598	0.958799
	0.734991	0.73379
	0.870153	0.699917
	1.09057	1.00054
	0.866711	0.920597
	0.948704	1.00248
	0.947341	0.814103
	0.830526	0.938173
	0.627277	0.722959
	0.951634	1.03083
	1.1111	1.12045
	0.903827	0.860562
	0.716191	0.689493
	0.557746	0.729358
	1.15507	1.07093
	1.31312	1.36917
	0.558246	0.746997
	1.0274	1.13744
	1.09222	1.02897
	0.845473	0.755182
	0.974961	0.935848
	1.20466	0.94536
	0.561676	0.708685
	0.640997	0.678418
	0.792349	0.669085
	0.80665	0.810793
	1.54195	1.44886
	1.11486	1.06844
	0.774341	0.660456
	1.16683	1.2391
	1.01199	1.14715
	0.998617	1.0461
	0.934043	0.886571
	0.916458	0.963717
	0.935412	0.89176
	1.19453	0.972258
	1.30289	1.28837
	1.11187	1.09639
	0.988936	0.849111
	1.11768	1.12173
	1.11655	1.08165
	1.2629	1.48699
	1.29978	1.41129
	0.837519	0.98522
	0.746529	0.777475
	0.859464	1.04712
	1.01653	0.807063
	1.08539	1.19007
	1.04196	1.1795
	1.34478	1.38655
	0.972054	0.994204
	1.0059	1.04896
	1.14976	1.21943
	0.98911	1.13221
	1.2994	1.19667
	1.17836	1.13549
	0.88034	1.03283
	0.967016	1.12054
	1.21491	1.38566
	0.771674	0.808436
	0.822963	0.90844
	0.891551	0.81716
	1.0607	1.08556
	0.893537	0.95343
	0.686303	0.764066
	0.895087	0.94937
	1.0802	0.931189
	1.08826	1.16364
	0.841831	0.937804
	0.934298	1.1461
	0.969982	1.0625
	0.638281	0.615341
	0.810274	0.704159
	0.939414	0.820251
	0.75988	0.726239
	0.887105	0.785023
	0.985382	0.787236
	0.721545	0.637585
	0.776968	0.742041
	0.982433	0.865702
	1.05688	1.08264
	1.02394	1.06652
	1.31237	1.19587
	0.913363	0.726412
	0.777943	0.898025
	0.908858	0.920099
	1.05819	1.04754
	1.08545	1.09053
	0.977574	0.874083
	1.11235	1.1601
	1.21144	1.24276
	0.556245	0.625547
	1.09611	1.13288
	0.80612	0.895312
	0.609685	0.549225
	1.17034	1.14965
	0.765004	0.607146
	1.15463	1.03882
	0.919386	0.992435
	0.801541	0.733031
	0.944175	1.01151
	0.899769	1.01704
	1.06038	1.12497
	0.849198	0.902569
	0.902369	0.864141
	1.25035	1.15558
	0.700909	0.891589
	0.807198	0.822841
	1.08767	1.03193
	1.18305	1.24062
	0.904256	1.03717
	1.07302	1.24412
	1.39888	1.38267
	0.984309	1.22367
	1.0774	1.10534
	0.959452	1.175
	0.939572	0.817548
	0.538237	0.65203
	0.688637	0.617054
	1.16206	1.22273
	0.996553	1.11706
	1.29186	1.33417
	1.50917	1.55384
	1.10851	1.07306
	1.12359	0.929757
	0.9606	0.908603
	1.15991	1.11389
	0.777083	0.846752
	0.929871	0.972592
	0.98327	1.1189
	0.711966	0.804711
	0.796476	0.637448
	0.756634	0.750187
	0.741827	0.810484
	1.24599	1.30331
	0.9064	0.778358
	0.873719	0.89217
	1.17872	1.27071
	1.00251	1.1499
	1.29787	1.43678
	1.08767	1.21269
	0.937412	1.10987
	1.12384	1.152
	0.974157	1.14334
	1.11767	1.31683
	1.46637	1.45627
	1.14558	1.1919
	0.961014	0.869103
	1.61078	1.65898
	1.20596	1.17332
	1.2566	1.03965
	0.819686	0.667336
	0.896217	0.811544
	1.03549	1.23456
	1.16995	1.2071
	0.986196	0.898894
	1.25634	1.38093
	0.530825	0.622931
	1.03943	0.939746
	1.02852	1.00136
	0.950737	0.928118
	0.973579	0.90155
	1.04268	1.01668
	1.01929	1.14403
	1.08419	1.14168
	0.814625	0.905141
	1.08896	1.06721
	1.03419	1.03459
	0.68475	0.712476
	0.989363	1.02335
	1.35731	1.21739
	1.35303	1.3571
	1.17034	1.21616
	1.13479	1.16236
	1.05897	1.02295
	1.38907	1.2983
	0.975761	0.992749
	1.20377	1.23232
	1.1718	1.15709
	0.669885	0.643574
	1.02474	1.15648
	1.15411	1.21729
	0.878035	0.808068
	0.582373	0.558286
	1.06011	1.01206
	1.32639	1.31536
	1.14317	1.15453
	1.42161	1.50378
	1.11447	1.15688
	0.553087	0.718752
	0.704218	0.785449
	1.06801	1.10691
	0.788805	0.724932
	1.17712	1.10872
	1.48406	1.55716
	1.29659	1.33306
	1.44188	1.42227
	1.29775	1.3235
	1.02864	1.11
	0.850663	0.672465
	0.717197	0.6132
	1.44322	1.35366
	1.21446	1.10073
	0.575473	0.656403
	1.06013	0.87759
	0.98223	0.983285
	0.722344	0.760073
	0.754018	0.788487
	0.985426	0.95287
	0.91835	0.855795
	0.757253	0.760148
	1.11626	1.07893
	1.12005	1.07799
	1.06956	1.10251
	1.0558	0.913251
	0.586401	0.627783
	0.999713	0.901261
	1.14846	1.03894
	0.676079	0.850216
	1.07596	1.0899
	1.02269	0.911837
	0.723246	0.821647
	1.06501	1.07282
	0.827559	0.756322
	1.20269	1.09128
	0.961431	0.835859
	1.19938	1.14627
	1.25387	1.28707
	1.33227	1.28919
	1.01409	1.02229
	1.34731	1.27586
	1.08299	1.05139
	0.744972	0.741285
	0.987151	0.89023
	0.541255	0.605772
	1.23561	1.1901
	1.01049	1.05502
	0.857616	0.763925
	0.752162	0.689322
	1.0138	0.97721
	0.966466	0.806969
	0.821597	0.969029
	0.964361	1.03174
	0.781449	0.935281
	1.13535	1.20485
	1.01207	1.06556
	0.856808	0.784872
	1.02545	1.03359
	1.04435	1.06579
	1.15384	1.0162
	0.924748	0.869485
	0.759555	0.940461
	1.36006	1.33925
	1.41991	1.32063
	1.0905	1.07847
	1.32604	1.24286
	0.971159	1.04703
	1.10433	1.09361
	0.713281	0.789304
	0.759816	0.755069
	0.937615	0.97546
	0.823287	0.744201
	0.713129	0.639715
	1.27307	1.15226
	1.3693	1.38542
	1.14447	0.927218
	1.11974	1.16875
	1.44939	1.36124
	0.538737	0.581284
	1.41001	1.31496
	0.770264	0.781721
	0.558317	0.555306
	0.875724	0.895265
	0.978805	0.884101
	0.810064	0.747619
	1.08745	0.981087
	1.18569	1.19311
	0.537245	0.53351
	0.92319	1.00928
	1.10757	1.12113
	1.21294	1.21593
	0.921361	0.938668
	0.553422	0.507075
	0.8398	0.971865
	0.56615	0.710924
	0.588247	0.646275
	0.539157	0.586508
	0.784703	0.544257
	0.77943	0.863005
	0.933587	0.935864
	0.571105	0.540036
	1.28458	1.24025
	0.936217	0.912823
	0.705337	0.738422
	1.05469	1.05221
	0.957176	1.0116
	0.537059	0.431923
	1.15243	1.10402
	1.20356	1.15655
	1.21701	1.22982
	0.798689	0.952665
	1.02617	0.975435
	0.998723	1.03676
	1.35821	1.24417
	0.819015	0.733385
	1.38766	1.22416
	1.04198	1.12799
	1.23151	1.21885
	1.03523	0.987324
	1.03458	1.02297
	0.923013	0.908776
	1.13163	0.996295
	0.960536	0.968111
	1.1435	1.07397
	0.877942	0.886942
	1.21571	1.17804
	1.10718	1.25116
	0.89286	0.843749
	0.926346	1.00628
	0.903082	0.961543
	0.9813	1.02356
	0.624068	0.7268
	0.573982	0.681936
	0.658507	0.768035
	1.31874	1.18436
	1.33369	1.25299
	0.891482	0.973701
	1.00041	0.967834
	0.865654	0.908213
	1.31036	1.27731
	0.99956	1.10087
	0.938308	0.976678
	1.38183	1.25183
	0.850991	0.775731
	0.769784	0.80273
	1.32054	1.30335
	0.896045	0.960632
	0.706612	0.803833
	1.06117	0.979585
	0.793711	0.76201
	0.834324	0.92641
	1.18954	1.19061
	0.557758	0.545623
	1.04269	1.12592
	0.816879	0.979766
	0.781008	1.05964
	0.520276	0.575418
	0.879777	0.956905
	1.24468	1.2267
	1.10187	1.04544
	0.805617	0.848782
	1.10833	1.16332
	0.895098	0.869967
	1.09522	1.09001
	1.02342	1.03946
	1.02538	0.870494
	0.881381	1.08968
	1.01123	1.19135
	0.968733	1.08002
	0.982942	1.07699
	0.829793	0.729837
	0.786523	0.828833
	0.755062	0.927423
	0.825034	0.842539
	0.783593	0.724094
	0.800521	0.923272
	1.24628	1.21872
	0.737557	0.763556
	1.37568	1.32973
	0.875331	0.764485
	0.836667	0.716107
	1.21221	1.17869
	1.25625	1.22847
	0.764055	0.998172
	0.954627	0.894087
	1.15068	0.979775
	0.76125	0.89946
	1.0152	0.965738
	0.831903	0.763918
	0.995657	1.07431
	0.621609	0.823515
	1.04892	1.31396
	0.772438	0.789926
	0.98491	0.89096
	0.606487	0.901329
	0.944041	0.802555
	0.910192	0.700211
	1.20724	1.11401
	1.16865	1.00232
	0.953293	0.655657
	0.607217	1.16714
	1.25541	1.30681
	0.699006	0.581676
	1.069	1.19987
	1.11683	1.01903
	1.86665	1.71227
	0.87064	0.83357
	0.794411	0.692448
	1.0301	1.06243
	1.23454	1.22548
	1.02316	0.986258
	1.23689	1.15117
	1.09513	1.03686
	1.45764	1.29914
	1.40561	1.3155
	1.20101	1.08546
	1.00879	1.03766
	1.17204	1.10353
	1.24178	1.39524
	1.23911	1.48335
	1.02862	0.840357
	0.752168	0.701343
	1.14631	1.3634
	0.867489	1.04142
	0.867345	0.756595
	0.687785	0.596908
	0.890407	0.985643
	1.11469	1.01881
	1.01079	1.21088
	0.693991	0.567526
	1.49488	1.69992
	0.530922	0.550918
	1.0724	1.05046
	0.806328	0.708639
	0.867869	0.81023
	0.753073	0.929136
	0.745316	0.824581
	0.719675	0.628526
	0.827411	0.999078
	1.12776	0.993608
	0.854302	0.870643
	0.854745	0.824056
	0.896989	0.893925
	0.674622	0.446004
	1.09681	1.22995
	0.809311	0.431153
	0.618834	0.451274
	0.996203	1.13169
	1.11077	1.17038
	0.6671	0.628252
	0.793562	0.733484
	1.42045	1.62237
	1.04795	0.855882
	1.13098	1.30643
	0.835168	0.826665
	1.03303	0.933618
	1.13344	1.07747
	1.44206	1.56277
	1.07201	1.19329
	1.05177	0.864297
	1.16321	1.06102
	0.761333	0.729767
	1.10551	1.13697
	1.14016	1.01002
	0.971174	1.00694
	0.878385	0.732242
	1.44629	1.66122
	0.855566	0.716354
	1.04848	1.01704
	1.37715	1.79488
	1.37131	1.52383
	0.756391	0.737067
	1.04288	1.15319
	1.13134	1.15876
	0.72973	0.762663
	1.12638	1.33406
	1.12431	1.06165
	1.33026	1.31399
	0.624252	0.543253
	1.08645	0.687546
	1.37169	1.43055
	0.865334	0.898955
	0.923942	1.01867
	1.23148	1.29973
	0.700714	0.755956
	0.919017	0.640366
	1.16108	1.28155
	0.808018	0.772483
	1.17604	1.29861
	1.18522	1.25295
	1.3283	1.53732
	1.13904	1.1155
	1.06064	1.01771
	0.793797	0.638107
	1.26097	1.03327
	0.87108	0.692081
	0.726857	0.768092
	1.20713	1.19299
	0.944777	1.02565
	0.672271	0.582057
	1.31693	1.59814
	0.918771	0.863265
	0.810487	0.925804
	1.06474	0.995041
	0.712164	0.774023
	0.91771	1.12034
	0.91597	1.01177
	0.944001	1.22239
	1.41671	1.28967
	1.16681	1.02357
	0.82224	0.639904
	0.968415	0.676911
	0.957039	0.752465
	0.942796	0.87093
	1.2397	1.34464
	1.17678	1.20968
	1.08356	1.00765
	1.06943	1.18423
	1.11214	1.06013
	0.619696	0.419081
	0.824673	0.910157
	1.18297	1.05038
	1.09115	0.837687
	0.824825	0.663976
	1.0415	1.1507
	1.24348	1.33543
	0.907135	0.612238
	0.645553	0.655832
	1.03426	1.11812
	0.760654	0.632646
	1.27328	1.49719
	1.09469	1.05058
	1.114	1.10357
	1.02165	1.13825
	0.898086	1.34201
	0.9396	1.14439
	0.703299	0.507529
	1.13403	1.18328
	1.30293	1.08987
	1.15677	1.05273
	0.982263	0.988271
	1.38119	1.54753
	1.00483	0.996075
	1.21199	1.17939
	0.820947	0.769968
	0.695542	0.699547
	0.870074	0.822545
	1.19771	1.18946
	1.04088	1.0949
	1.18452	1.15581
	1.29203	1.29819
	0.756952	0.917998
	0.952902	0.727595
	0.900959	0.911171
	0.869212	0.935124
	0.906174	1.03013
	0.880715	1.05445
	0.864008	0.826046
	1.11873	1.04339
	0.976086	1.09864
	0.779145	0.909015
	1.0231	0.73992
	1.04298	0.876679
	0.921184	0.93819
	1.42767	1.32386
	0.815591	0.758009
	1.2183	1.03071
	0.991169	1.08794
	0.896707	1.06696
	1.1026	0.909734
	0.855853	0.923387
	1.39063	1.41181
	1.37447	1.52271
	1.00697	0.994687
	0.859588	0.694636
	1.28624	1.13587
	1.0729	1.18221
	1.3764	1.28354
	0.938307	0.892488
	0.867371	0.667112
	0.77225	0.587806
	1.26048	1.39797
	0.88134	0.989395
	0.894638	0.800957
	1.13324	1.17067
	0.963158	0.989138
	1.01687	1.08834
	0.87103	0.989029
	1.07219	1.04839
	0.708471	0.675953
	1.4097	1.04857
	1.15974	1.044
	0.78966	0.870355
	1.23561	1.41585
	0.946767	1.22033
	0.954395	0.893606
	1.0086	1.07515
	0.707178	0.93201
	1.21792	1.32027
	1.15569	1.06138
	1.22778	1.2649
	0.88487	0.873166
	0.71594	0.617667
	0.869751	0.950334
	1.00089	0.852639
	0.739498	0.684507
	0.620558	0.515742
	1.00194	0.994288
	1.63699	1.68121
	1.30576	1.1808
	1.03988	1.07326
	0.8049	1.04728
	1.06766	1.42682
	1.20188	0.921147
	0.990427	1.30775
	1.17123	1.13154
	0.683476	0.846498
	0.868437	0.824557
	1.18193	1.14415
	0.921435	0.899412
	0.913772	0.499563
	0.716228	0.705942
	1.32638	1.30843
	0.817643	0.775438
	0.963889	0.868681
	0.737652	0.913429
	0.873953	0.863385
	0.818361	0.979437
	0.768228	0.92171
	1.11418	1.21912
	1.49259	1.24726
	1.40224	1.26188
	0.973947	1.04152
	1.25977	1.38476
	0.986934	0.99492
	1.08314	1.1637
	0.722257	0.705041
	0.751702	0.794265
	1.0898	1.10658
	0.829725	0.842842
	0.717674	0.785243
	0.921315	0.866988
	0.698426	0.819328
	0.960199	0.882821
	1.30448	1.4211
	1.32323	1.34524
	0.875783	0.685356
	1.18128	1.04607
	1.26441	1.23006
	0.65993	0.907732
	0.900595	0.929787
	0.992989	0.85475
	1.73636	1.88029
	1.04228	0.999829
	1.19455	1.38019
	1.34841	0.975281
	0.623497	0.827986
	1.16065	1.31653
	0.888012	0.837395
	1.549	1.28075
	0.640682	0.433816
	0.860109	0.819784
	1.21775	1.05542
	1.26408	1.27367
	1.12474	1.15152
	1.13341	1.26788
	1.27587	1.13775
	0.981096	1.16694
	1.23361	1.35124
	0.892739	0.650583
	0.66268	0.803379
	0.933901	1.04858
	1.27331	1.10945
	1.05421	1.26514
	0.918403	0.597499
	1.45445	1.4421
	1.2477	1.49595
	0.712725	0.703948
	0.878074	0.735481
	1.16511	1.31881
	1.06528	1.0393
	0.808873	0.897403
	1.25827	1.32129
	0.856076	0.842315
	1.20305	1.0932
	0.678262	0.804442
	0.854243	0.789574
	0.774318	0.831436
	0.64736	0.6088
	1.01439	1.1112
	0.785195	0.798366
	0.725007	0.576719
	0.802915	0.8011
	1.22845	1.44411
	0.786073	0.729588
	1.40978	1.69654
	0.856993	0.716508
	0.73211	0.642977
	1.2421	1.26114
	0.884337	0.899503
	1.47757	1.57247
	1.03652	0.9796
	0.994895	0.759177
	0.857909	0.704909
	1.45715	1.42971
	1.21094	1.30274
	0.797966	0.824614
	1.06528	1.17087
	1.5644	1.60129
	0.85516	0.959073
	1.07239	0.831784
	1.0066	0.972875
	1.07119	0.939847
	1.06249	0.817435
	1.50303	1.66789
	0.850053	0.785972
	0.725923	0.979079
	0.696593	0.640568
	1.13624	1.02053
	0.814914	1.06416
	1.06402	0.876745
	0.918796	1.05355
	0.891329	1.14165
	0.622809	0.665913
	0.762586	0.671989
	0.616852	0.572345
	1.01425	0.96606
	1.03733	1.15276
	0.777956	0.874193
	0.970204	0.957727
	0.779818	0.729622
	1.07264	0.910993
	0.615935	0.619736
	0.85691	0.926415
	1.15536	0.972986
	0.926259	0.950749
	1.0012	0.962642
	1.10957	1.12802
	1.17358	0.978156
	1.20575	1.06383
	1.18604	1.00092
	0.982334	0.876484
	0.804137	0.838467
	0.750121	0.649812
	0.854335	1.0216
	0.903005	1.16468
	0.918607	1.02358
	0.780756	0.917757
	0.749421	1.03168
	1.05363	1.11453
	1.19662	1.38529
	1.17104	1.12696
	0.836412	0.659837
	0.80597	0.675229
	0.917792	0.85715
	0.672304	0.686267
	0.817294	0.679774
	0.838001	0.805939
	0.767227	0.808751
	0.693083	0.566234
	1.05928	1.02215
	0.899857	0.941518
	1.15103	1.21931
	1.09883	1.32873
	1.24957	1.38275
	0.948507	1.06057
	0.901228	0.777239
	1.08612	1.11498
	0.750411	0.632315
	0.752126	0.815915
	1.14627	1.15109
	0.827934	0.738004
	1.16317	1.39871
	1.07265	1.09879
	1.27186	1.37531
	0.986829	1.0996
	0.816911	0.758766
	1.25163	1.33493
	1.22172	1.379
	0.671279	0.556557
	0.866685	0.860345
	0.870506	0.683806
	1.21896	1.11035
	0.762772	0.73275
	1.07931	1.01042
	1.37709	1.29251
	0.723511	0.582098
	1.47476	1.42006
	0.855513	0.857233
	0.973109	1.00027
	0.989993	1.17107
	0.770956	0.771819
	0.940444	0.930005
	1.13725	1.29872
	0.825945	0.99074
	0.857081	0.816776
	1.31055	1.24839
	0.720865	0.616472
	1.28269	1.46438
	0.898958	1.03594
	1.02779	0.961534
	0.72883	0.600809
	0.955372	1.15585
	0.775033	0.878805
	0.897325	0.960025
	0.714887	0.674281
	0.989511	0.931982
	0.896488	0.901704
	0.712486	0.76769
	0.754864	0.716358
	0.935795	0.910116
	0.706884	0.538796
	0.778397	0.617625
	1.17155	1.15995
	0.838513	0.983561
	0.998343	1.08604
	0.857582	0.810866
	1.09365	1.04962
	0.876092	0.794903
	1.01936	0.950432
	1.04905	1.04011
	0.752943	0.73888
	1.16144	1.18256
	1.37164	1.36388
	0.787601	0.79485
	0.661479	0.406549
	0.985136	0.804508
	1.05073	0.956402
	0.916971	1.06672
	0.682593	0.836914
	0.991039	0.960031
	1.21532	1.06759
	0.830524	0.682886
	0.988662	0.963609
	1.13247	1.20188
	1.02568	0.875539
	0.985849	0.955499
	1.29062	1.3132
	1.17479	1.30817
	1.31775	1.30809
	1.0226	0.979915
	1.23392	1.39639
	1.42968	1.41837
	1.12234	1.14803
	0.789071	0.753262
	1.15633	1.12014
	1.25534	1.07838
	1.20785	1.27747
	1.09848	1.04349
	0.907843	0.847488
	1.89868	1.85606
	0.808719	0.83757
	1.03093	0.994447
	1.49755	1.53833
	0.765846	0.778017
	1.11051	1.01075
	1.24472	1.3196
	1.20011	1.26387
	0.785757	0.853504
	0.811904	0.838372
	1.06145	1.37318
	1.10267	1.0961
	0.895937	0.820454
	1.34019	1.349
	0.776503	0.739469
	1.25184	1.24684
	0.712437	0.801593
	1.21927	1.26578
	1.26662	1.3545
	1.08168	1.03785
	0.889658	0.652541
	1.07118	1.22606
	0.841491	0.783273
	1.20282	1.32402
	1.10184	1.10773
	1.41929	1.40372
	0.817015	0.853899
	1.14001	1.1801
	1.00969	0.857241
	1.05116	0.889212
	0.771729	0.872098
	1.01052	0.932983
	1.01489	0.971339
	0.747649	0.781385
	0.789193	0.634348
	1.12024	1.0765
	1.06114	1.19343
	1.03416	1.13394
	1.00309	1.14536
	0.876331	0.790625
	1.01912	1.08952
	1.08752	1.23836
	1.43758	1.67312
	0.77643	0.811248
	0.880738	0.947572
	1.27364	1.27101
	1.0977	1.0281
	0.853155	1.02661
	0.892491	0.834977
	1.05364	1.33267
	0.819261	0.890566
	0.832991	0.78259
	1.17419	1.21306
	0.747623	0.954824
	0.854808	0.842209
	0.892491	0.852091
	0.846214	0.888382
	0.862584	1.16183
	0.698882	1.12251
	0.905713	0.829192
	0.839338	1.04546
	0.85188	0.732086
	0.978434	1.10167
	0.663308	0.786608
	0.81621	0.988109
	0.85732	0.925899
	1.04653	0.792794
	0.953675	1.0809
	0.953643	0.839075
	1.03844	1.08526
	0.852825	0.846491
	1.03242	1.00652
	0.958161	1.02936
	0.873421	1.02054
	1.27108	1.09643
	0.945379	0.908079
	1.22807	1.10634
	1.08978	1.31483
	0.837223	1.01865
	1.15158	0.982887
	1.07393	1.26521
	0.715693	0.6926
	1.01149	0.944455
	0.728232	0.836238
	1.13783	1.22284
	1.10052	0.952928
	0.896898	0.872259
	0.792381	0.716643
	0.854628	0.790625
	1.34777	0.943286
	0.78468	0.6695
	0.881991	1.03819
	0.876247	1.05935
	0.767616	0.954803
	1.27673	1.38221
	0.687548	0.944893
	0.713993	0.740809
	0.790194	0.923199
	1.00114	1.135
	1.05271	1.29455
	0.944346	0.993027
	0.766055	1.00998
	0.708483	0.749246
	1.07557	1.20596
	0.804895	0.785804
	0.957279	0.813283
	0.797103	0.805088
	0.772577	0.899095
	1.03726	1.1703
	0.744844	0.80107
	0.885111	1.07422
	0.804481	0.951974
	1.1626	1.14393
	1.19448	1.28563
	1.10099	1.03779
	0.73658	0.869969
	0.750826	0.668037
	1.19131	1.2475
	0.758218	0.907407
	0.904978	0.914629
	0.923657	1.0086
	0.759326	0.880844
	1.22437	0.921592
	0.745224	1.08221
	1.06997	1.29126
	1.22375	1.24232
	0.7182	0.848257
	0.883204	1.01295
	0.784731	0.869688
	0.816163	0.972285
	0.830053	0.693906
	0.976073	0.770136
	1.44617	1.35332
	0.878981	0.889977
	0.789547	0.777884
	0.947182	0.927363
	1.19908	1.06228
	1.12801	1.02866
	0.756832	0.876752
	0.716196	0.77094
	1.4098	1.40679
	0.662206	1.06662
	0.856956	0.882222
	1.12333	1.08329
	1.35549	0.992388
	0.956851	0.960349
	1.15095	1.11436
	0.924945	1.01962
	1.69257	1.83025
	0.904721	1.09193
	1.1201	0.960906
	0.932818	0.747237
	0.88588	0.720722
	1.06129	1.15444
	1.09661	1.07807
	1.31194	1.42977
	0.872658	0.608637
	0.970879	0.781169
	0.883046	0.851368
	1.01413	0.98346
	1.25799	1.17354
	1.75413	1.67717
	1.02351	0.778135
	1.04851	0.979764
	0.909753	0.831744
	0.988351	0.702778
	1.21471	1.17682
	1.06041	0.782096
	1.55566	1.48084
	1.34963	1.446
	1.22268	1.16612
	1.63816	1.56895
	0.82886	0.780682
	0.859849	0.692658
	0.972558	0.937662
	1.3694	1.19408
	1.51567	1.18048
	1.66768	1.42982
	1.02273	1.22824
	0.932157	0.730364
	1.30028	1.43539
	1.06318	0.840039
	0.916102	0.552393
	1.00879	1.03178
	0.722807	0.656846
	1.11341	1.11865
	0.85613	0.813524
	0.850621	0.68778
	1.05323	0.944274
	1.81769	1.81649
	0.845479	0.892399
	1.28639	1.27055
	0.813158	0.749648
	0.885145	0.73947
	0.946848	0.845262
	1.12374	1.23115
	0.954824	0.826093
	0.87987	0.733651
	1.05512	0.986353
	1.00194	0.758218
	0.91012	0.676531
	1.02251	0.730846
	1.05874	0.723226
	1.51959	1.53265
	0.954491	0.87402
	1.61007	1.58865
	1.22917	0.878243
	1.47683	1.38798
	1.45026	1.50424
	1.30873	1.44337
	1.14429	1.03855
	1.06259	0.920257
	0.831187	0.712701
	1.39569	1.26487
	1.42841	1.12344
	0.831631	0.854948
	1.91511	1.64157
	0.993066	0.874689
	1.37874	1.46963
	1.29718	1.17406
	0.744799	0.648788
	1.1826	0.952709
	1.48851	1.36751
	1.20499	0.872711
	0.93115	0.904573
	1.09285	1.11064
	1.17444	1.27992
	1.19392	1.07554
	1.49748	1.37721
	1.33446	1.35767
	1.30913	1.37744
	0.755435	0.934493
	1.29892	1.19964
	1.26168	1.44417
	0.947615	1.20476
	1.17578	1.07046
	0.801253	0.797509
	0.678647	0
	1.22032	1.31218
	0.96618	0.968298
	0.768925	0.668522
	0.909791	1.04606
	0.874051	0.90816
	0.762255	1.01914
	1.00614	0.855381
	1.00056	0.918367
	0.725965	0.723443
	0.845714	0.613618
	1.11032	1.25437
	1.16868	1.26566
	1.15028	0.991854
	0.905277	0.821518
	0.842691	0.953976
	0.966432	0.967854
	0.9775	0.858645
	1.13066	1.58848
	1.2092	1.01803
	0.825306	0.830747
	0.9493	0.862197
	1.08023	0.999723
	1.15806	1.33886
	1.00448	0.972183
	0.799278	0.76236
	0.715225	1.00482
	0.836968	0.794999
	0.951131	1.12576
	0.812162	0.91623
	1.13825	1.11513
	0.781032	1.05145
	1.44314	1.54745
	1.31046	1.40916
	1.40503	1.1021
	1.63549	1.62985
	1.28066	1.35924
	0.947062	0.86235
	0.6994	0.811707
	1.41097	1.44791
	1.10202	0.998994
	0.646824	0.802867
	0.744021	0.891751
	0.811776	0.947298
	1.13916	1.04302
	1.08245	0.883232
	0.690061	0.853283
	0.867585	1.53225
	1.30865	1.42314
	1.19701	1.26698
	0.743132	0.800328
	1.0035	1.01881
	0.833564	0.931902
	0.587034	0.611286
	0.730621	0.770464
	1.06222	0.981695
	1.11378	0.8731
	1.30787	1.21873
	0.605317	0.616815
	0.604823	0.570021
	0.814584	0.708155
	0.575471	0
	0.915239	0.836964
	1.18111	1.52341
	1.10327	1.22697
	0.638177	0.550204
	1.70295	1.68585
	0.939228	0.843099
	1.33887	1.28727
	0.833217	0.945727
	0.988174	1.18983
	0.598745	0
	0.841771	0.949388
	0.848308	0.758396
	0.722585	1.00935
	0.730531	0.813909
	0.968161	0.974335
	0.939699	0.817677
	1.15366	0.97308
	0.858965	0.819428
	0.809395	0.7542
	0.895177	0.822975
	0.761143	0.907488
	1.08701	1.09295
	0.734682	0.83256
	0.928937	1.00727
	0.85411	0.86867
	0.95954	1.07145
	0.790717	0.942342
	0.941276	0.990834
	0.670086	0.710681
	1.00604	1.15694
	1.30057	1.01986
	1.26317	1.26579
	1.09917	1.271
	1.05533	0.942042
	0.858512	0.96234
	0.79383	0.909236
	1.13869	1.20683
	0.840526	0.735316
	1.15087	0.866805
	1.01411	0.891751
	1.01705	1.02251
	0.814663	0.915647
	0.773076	0.945372
	0.794868	0.916619
	0.833781	0.838362
	0.818734	0.883652
	0.760278	0.643071
	1.22803	1.12502
	0.802131	0.674234
	0.939045	1.09917
	0.793207	0.932182
	0.725343	0.767022
	0.8164	0.768771
	1.24614	1.32182
	0.864652	0.873683
	0.641913	0.818313
	0.802037	0.855615
	0.832965	1.01082
	1.41824	1.34589
	1.26364	1.43244
	0.696759	0.995264
	1.07663	1.15474
	0.93288	0.886311
	1.06719	1.25818
	0.974387	0.811707
	1.23199	1.06438
	1.11366	1.10104
	0.766702	0.90091
	0.703551	0.968557
	0.748518	0.673379
	1.15308	1.1037
	1.01564	1.0171
	0.714447	0.715926
	0.985283	0.981646
	0.68604	0.864516
	0.940144	0.913025
	0.984546	0.890059
	1.09774	1.22475
	0.965338	1.09772
	0.993273	1.00572
	0.872435	0.59994
	1.24391	1.11802
	0.839747	0.917687
	0.778265	1.07511
	0.794868	0.726672
	1.21925	1.06691
	0.73546	0.751868
	0.971044	1.06598
	1.08256	0.742341
	1.54832	1.56347
	1.00587	0.88195
	1.57133	1.56033
	1.26954	0.903934
	1.50728	1.41768
	1.45209	1.50549
	1.34591	1.47349
	1.18807	1.0655
	1.10964	0.946278
	0.887513	0.719855
	1.42938	1.29359
	1.4608	1.15106
	0.850906	0.880457
	1.92798	1.67325
	1.02734	0.884908
[truncated: 6,006 more rows]
