# Supplementary material for: Engineering paralog-specific PSD-95 recombinant binders as minimally interfering multimodal probes for advanced imaging techniques
Source: eLife. 2024 Jan 3;13:e69620. doi: 10.7554/eLife.69620 (PMC10803022; doi:10.7554/eLife.69620)
Supplement: Figure 5—source data 1. [file elife-69620-fig5-data1.xlsx]

## Sheet: Fig5d 
Fig 5d	Spreadsheet with the fluorescence intensity ratio data
		Fluorescence intensity ratio
	Time post STED acquisition (min)	STED area								non-STED area
	-1	1	1	1	1	1	1	1	1	1	1	1	1	1	1	1	1	1
	0	0.421494	0.291563	0.6996	0.248	0.270892	0.595997	0.330836	0.815042	1.14725	0.910563	0.729434	0.799518	0.815051	0.732189	0.983132	1.0515	1.03824
	3	0.528788	0.37554	0.672357	0.426872	0.444657	0.576326	0.441385	0.612812	0.845388	0.885277	0.707198	0.943091	0.945994	0.954161	0.791441	0.868918	1.06305
	6	0.639173	0.453891	0.495459	0.644718	0.458069	0.587829	0.518324	0.528968	1.05057	0.719108	0.598329	0.61278	0.701107	0.723947	0.86339	1.01786	1.04645
	9	0.62628	0.507979	0.498547	0.558359	0.527192	0.660416	0.580381	0.519234	1.02322	0.927255	0.736247	0.814661	0.865427	0.960257	0.779467	0.953934	1.1109
	12	0.653921	0.562132	0.663821	0.66359	0.493884	0.649948	0.65489	0.772492	1.08762	1.01931	0.937018	0.791271	0.924657	0.986903	0.791649	1.21545	1.06315
	15	0.707171	0.746436	0.697966	0.609846	0.570671	0.75463	0.716542	0.940022	1.05081	0.996263	0.917609	0.974488	0.951483	1.09066	1.05019	1.0867	1.11398
