# Supplementary material for: Engineering paralog-specific PSD-95 recombinant binders as minimally interfering multimodal probes for advanced imaging techniques
Source: eLife. 2024 Jan 3;13:e69620. doi: 10.7554/eLife.69620 (PMC10803022; doi:10.7554/eLife.69620)
Supplement: Figure 6—figure supplement 1—source data 1. [file elife-69620-fig6-figsupp1-data1.xlsx]

## Sheet: Fig6-FS1c
Fig 6- Figure Supplement 1c	Spreadsheet with the diffusion distribution data
		Occurrence (%)
	log diffusion	mean	SEM
	-5	35.84	1.583
	-4.8	0.07484	0.0207
	-4.6	0.1575	0.02373
	-4.4	0.2251	0.04151
	-4.2	0.3701	0.05354
	-4	0.5654	0.07579
	-3.8	0.8976	0.1249
	-3.6	1.303	0.13
	-3.4	2.171	0.2484
	-3.2	3.223	0.2751
	-3	4.451	0.3292
	-2.8	5.729	0.3224
	-2.6	7.183	0.2645
	-2.4	7.439	0.123
	-2.2	6.987	0.2518
	-2	6.038	0.4882
	-1.8	4.69	0.6269
	-1.6	3.736	0.5008
	-1.4	2.995	0.467
	-1.2	2.06	0.309
	-1	1.577	0.2991
	-0.8	1.038	0.1688
	-0.6	0.7178	0.095
	-0.4	0.3396	0.0597
	-0.2	0.1559	0.04091
	7.45058e-08	0.03013	0.007617
	0.2	0.005259	0.003336
	0.4	0	0
