# Supplementary material for: Engineering paralog-specific PSD-95 recombinant binders as minimally interfering multimodal probes for advanced imaging techniques
Source: eLife. 2024 Jan 3;13:e69620. doi: 10.7554/eLife.69620 (PMC10803022; doi:10.7554/eLife.69620)
Supplement: Figure 6—figure supplement 1—source data 2. [file elife-69620-fig6-figsupp1-data2.xlsx]

## Sheet: Fig6-FS1d
Fig 6- Figure Supplement 1d	Spreadsheet with the mobile fraction percentage data
	Mobile fraction (%)
	live	fixed
	30.9118	21.4911
	33.2324	12.3245
	30.8202	9.95363
	23.225	11.466
	19.6581	11.5578
	16.4575	9.12599
	17.0621
	15.3693
	22.5182
	17.6093
