# Supplementary material for: Engineering paralog-specific PSD-95 recombinant binders as minimally interfering multimodal probes for advanced imaging techniques
Source: eLife. 2024 Jan 3;13:e69620. doi: 10.7554/eLife.69620 (PMC10803022; doi:10.7554/eLife.69620)
Supplement: Figure 6—figure supplement 1—source data 3. [file elife-69620-fig6-figsupp1-data3.xlsx]

## Sheet: Fig6-FS1e
Fig 6- Figure Supplement 1e	Spreadsheet with the frequency distribution of single detection data
	Sequential single detection	Frequency (%)
		Mean	SEM
	8	17.09	0.4413
	10	23.48	0.2891
	12	14.88	0.275
	14	10.17	0.2351
	16	6.931	0.2375
	18	5.168	0.137
	20	3.959	0.1571
	22	3.054	0.07218
	24	2.272	0.07715
	26	1.919	0.1171
	28	1.554	0.06408
	30	1.154	0.07199
	32	0.9693	0.07692
	34	0.7592	0.04882
	36	0.6345	0.07553
	38	0.4626	0.04787
	40	0.4381	0.04868
	42	0.4209	0.05253
	44	0.3308	0.02137
	46	0.2714	0.04096
	48	0.2641	0.03938
	50	0.2024	0.02902
	52	0.1503	0.04354
	54	0.1595	0.02839
	56	0.1229	0.02246
	58	0.09122	0.02737
	60	0.1054	0.02346
	62	0.117	0.0183
	64	0.08241	0.01866
	66	0.05693	0.01141
	68	0.08495	0.02675
	70	0.08562	0.01527
	72	0.05757	0.02109
	74	0.05179	0.01386
	76	0.0586	0.01237
	78	0.04491	0.01337
	80	0.04922	0.01231
	82	0.05543	0.01682
	84	0.03641	0.00912
	86	0.02233	0.007092
	88	0.02378	0.007745
	90	0.01708	0.006537
	92	0.03027	0.01254
	94	0.02721	0.01648
	96	0.03549	0.009316
	98	0.0172	0.007383
	100	0.02951	0.005944
	102	0.02859	0.009613
	104	0.01968	0.009331
	106	0.02594	0.005055
	108	0.01945	0.01945
	110	0.007651	0.004868
	112	0.02726	0.01589
	114	0.01086	0.007271
	116	0.0126	0.008292
	118	0.01858	0.0108
	120	0.01154	0.005189
	122	0.01303	0.00755
	124	0.01051	0.004504
	126	0.008942	0.007634
	128	0.01163	0.004532
	130	0.002408	0.002408
	132	0.007737	0.004176
	134	0.002408	0.002408
	136	0.009426	0.004329
	138	0.005328	0.004096
	140	0	0
	142	0.004089	0.002622
	144	0.004167	0.004167
	146	0.01163	0.004532
	148	0.008984	0.005704
	150	0.01135	0.007447
	152	0.002323	0.002323
	154	0.01279	0.004441
	156	0.01135	0.007447
	158	0.001766	0.001766
	160	0	0
	162	0.007737	0.004176
	164	0.005328	0.004096
	166	0.001162	0.001162
	168	0.001162	0.001162
	170	0.001162	0.001162
	172	0	0
	174	0.008057	0.0051
	176	0	0
	178	0	0
	180	0.001162	0.001162
	182	0.00389	0.00389
	184	0.002408	0.002408
	186	0	0
	188	0.007781	0.007781
	190	0.001766	0.001766
	192	0	0
	194	0.01295	0.007431
	196	0.005657	0.003938
	198	0	0
	200	0	0
	202	0.005052	0.003831
	204	0	0
	206	0.002408	0.002408
	208	0.008333	0.008333
	210	0.00389	0.00389
	212	0.002408	0.002408
	214	0.006299	0.004146
	216	0	0
	218	0.005052	0.003831
	220	0	0
	222	0.008979	0.004206
	224	0.001162	0.001162
	226	0.008707	0.005554
	228	0.001162	0.001162
	230	0	0
	232	0.001162	0.001162
	234	0.001162	0.001162
	236	0	0
	238	0.001162	0.001162
	240	0.002408	0.002408
	242	0	0
	244	0	0
	246	0	0
	248	0.004167	0.004167
	250	0	0
	252	0	0
	254	0	0
	256	0	0
	258	0.002408	0.002408
	260	0	0
	262	0	0
	264	0	0
	266	0	0
	268	0.00389	0.00389
	270	0	0
	272	0	0
	274	0	0
	276	0	0
	278	0	0
	280	0.002408	0.002408
	282	0.001162	0.001162
	284	0	0
	286	0.00389	0.00389
	288	0	0
	290	0.001162	0.001162
	292	0.001162	0.001162
	294	0	0
	296	0	0
	298	0	0
	300	0.005328	0.004096
	302	0.0625	0.0625
	304	0.004167	0.004167
	306	0.004167	0.004167
	308	0	0
	310	0.004167	0.004167
	312	0.0106	0.0106
	314	0.008333	0.008333
	316	0	0
	318	0	0
	320	0	0
	322	0.004167	0.004167
	324	0	0
	326	0	0
	328	0	0
	330	0	0
	332	0	0
	334	0	0
	336	0	0
	338	0.00389	0.00389
	340	0.00389	0.00389
	342	0	0
	344	0	0
	346	0	0
	348	0	0
	350	0.05833	0.05833
	352	0.0125	0.0125
	354	0.005933	0.004188
	356	0.004167	0.004167
	358	0.00389	0.00389
	360	0	0
	362	0	0
	364	0.008057	0.0051
	366	0	0
	368	0	0
	370	0	0
	372	0	0
	374	0.00389	0.00389
	376	0.004167	0.004167
	378	0	0
	380	0	0
	382	0.00389	0.00389
	384	0	0
	386	0	0
	388	0.004167	0.004167
	390	0	0
	392	0.005052	0.003831
	394	0	0
	396	0	0
	398	0.001766	0.001766
	400	0	0
	402	0	0
	404	0	0
	406	0	0
	408	0.004167	0.004167
	410	0	0
	412	0	0
	414	0	0
	416	0.00389	0.00389
	418	0	0
	420	0	0
	422	0	0
	424	0	0
	426	0	0
	428	0.009219	0.00486
	430	0	0
	432	0.001162	0.001162
	434	0	0
	436	0	0
	438	0	0
	440	0	0
	442	0	0
	444	0	0
	446	0	0
	448	0.004167	0.004167
	450	0	0
	452	0	0
	454	0.00389	0.00389
	456	0	0
	458	0	0
	460	0	0
	462	0	0
	464	0	0
	466	0	0
	468	0.00389	0.00389
	470	0	0
	472	0	0
	474	0	0
	476	0	0
	478	0	0
	480	0	0
	482	0	0
	484	0	0
	486	0	0
	488	0	0
	490	0	0
	492	0	0
	494	0	0
	496	0	0
	498	0	0
	500	0	0
	502	0	0
	504	0	0
	506	0.00389	0.00389
	508	0	0
	510	0	0
	512	0	0
	514	0	0
	516	0	0
	518	0	0
	520
	522
	524
	526
	528
	530
	532
	534
	536
	538
	540
	542
	544
	546
	548
	550
	552
	554
	556
	558
	560
	562
	564
	566
	568
	570
	572
	574
	576
	578
	580
	582
	584
	586
	588
	590
	592
	594
	596
	598
	600
	602
	604
	606
	608
	610
	612
	614
	616
	618
	620
	622
	624
	626
	628
	630
	632
	634
	636
	638
	640
	642
	644
	646
	648
	650
	652
	654
	656
	658
	660
	662
	664
	666
	668
	670
	672
	674
	676
	678
	680
	682
	684
	686
	688
	690
	692
	694
	696
	698
	700
	702
	704
	706
	708
	710
	712
	714
	716
	718
	720
	722
	724
	726
	728
	730
	732
	734
	736
	738
	740
	742
	744
	746
	748
	750
	752
	754
	756
	758
	760
	762
	764
	766
	768
	770
	772
	774
	776
	778
	780
	782
	784
	786
	788
	790
	792
	794
	796
	798
	800
	802
	804
	806
	808
	810
	812
	814
	816
	818
	820
	822
	824
	826
	828
	830
	832
	834
	836
	838
	840
	842
	844
	846
	848
	850
	852
	854
	856
	858
	860
	862
	864
	866
	868
	870
	872
	874
	876
	878
	880
	882
	884
	886
	888
	890
	892
	894
	896
	898
	900
	902
	904
	906
	908
	910
	912
	914
	916
	918
	920
	922
	924
	926
	928
	930
	932
	934
	936
	938
	940
	942
	944
	946
	948
	950
	952
	954
	956
	958
	960
	962
	964
	966
	968
	970
	972
	974
	976
	978
	980
	982
	984
	986
	988
	990
	992
	994
	996
	998
	1000
