# Supplementary material for: Engineering paralog-specific PSD-95 recombinant binders as minimally interfering multimodal probes for advanced imaging techniques
Source: eLife. 2024 Jan 3;13:e69620. doi: 10.7554/eLife.69620 (PMC10803022; doi:10.7554/eLife.69620)
Supplement: Figure 6—source data 1. [file elife-69620-fig6-data1.xlsx]

## Sheet: Fig6d
Fig 6d	Spreadsheet with the number of detection data
	Number of detection
	cluster	object
	1191	2506
	1727	3155
	829.6	1763
	973.5	2735
	1108	2379
	665.3	1513
