# Supplementary material for: Engineering paralog-specific PSD-95 recombinant binders as minimally interfering multimodal probes for advanced imaging techniques
Source: eLife. 2024 Jan 3;13:e69620. doi: 10.7554/eLife.69620 (PMC10803022; doi:10.7554/eLife.69620)
Supplement: Figure 6—source data 2. [file elife-69620-fig6-data2.xlsx]

## Sheet: Fig6e
Fig 6e	Spreadsheet with the length and width data
	Length (nm)		Width (nm)
	object	cluster	object	cluster
	487	239.1	291.8	135.6
	410.6	165.2	235.4	94.46
	473.6	203	300.6	111.5
	444.2	125.2	257.8	69.72
	391.2	177.8	213.5	94.86
	400.5	157.7	207.7	88.57
