# Supplementary material for: Engineering paralog-specific PSD-95 recombinant binders as minimally interfering multimodal probes for advanced imaging techniques
Source: eLife. 2024 Jan 3;13:e69620. doi: 10.7554/eLife.69620 (PMC10803022; doi:10.7554/eLife.69620)
Supplement: Figure 6—source data 4. [file elife-69620-fig6-data4.xlsx]

## Sheet: Fig6j
Fig 6j	Spreadsheet with the mobile fraction percentage over time data
	time (min)	Mobile fraction (%)
	0	30.9118	33.2324	30.8202	23.225	19.6581	16.4575	17.0621	15.3693	22.5182	17.6093
	5	27.9762	34.0226	35.5494	19.9668	19.0789	18.5972	18.9947	20.8119	28.0105	9.2
	10	32.0562	34.3782	32.6316	22.1542	18.2292	20.9384	21.6981	23.0523	27.7674	15.092
	15	36.4127	32.988	32.9616	20.2091	17.2632	20.7547	19.2284	25.8903	29.1391	17.0965
	20	36.6695	34.9398	31.6971	21.9388	20.7395	19.6004	23.6374	23.1762	24.6206	15.1251
	25	32.9442	33.345	33.4579	21.0571	16.4384	21.5534	20.1691	18.704	23.8859	13.0148
	30	26.0736	35.0576	32.8054	16.2182	16.8724	17.4971	23.2613	29.8153	23.3397	13.7363
