# Supplementary material for: Engineering paralog-specific PSD-95 recombinant binders as minimally interfering multimodal probes for advanced imaging techniques
Source: eLife. 2024 Jan 3;13:e69620. doi: 10.7554/eLife.69620 (PMC10803022; doi:10.7554/eLife.69620)
Supplement: Figure 8—source data 1. [file elife-69620-fig8-data1.xlsx]

## Sheet: Fig8d
Fig 8d	Spreadsheet with the synaptic enrichment data
	synaptic enrichment
	GCaMP7f	Xph20-GCaMP7f
	0.902967	1.33688
	0.93408	1.50606
	0.90966	1.29449
	0.768757	1.23036
	0.766534	1.14791
	0.617865	1.41187
	0.786264	1.13221
	1.0256
	0.635762
