# Supplementary material for: Engineering paralog-specific PSD-95 recombinant binders as minimally interfering multimodal probes for advanced imaging techniques
Source: eLife. 2024 Jan 3;13:e69620. doi: 10.7554/eLife.69620 (PMC10803022; doi:10.7554/eLife.69620)
Supplement: Supplementary file 1. [file elife-69620-supp1.xlsx]

## Sheet: Sheet1
		Xph15	Xph18	Xph20	PSD-95-EGFP
	Plateau ± SEM (normalized)	0.7471 ± 0.005	0.7069 ± 0.005	0.7584 ± 0.007	0.3695 ± 0.006
	Rate constant ± SEM (s-1)	0.04394 ± 0.003	0.009754 ± 0.001	0.009908 ± 0.001	0.01328 ± 0.002
