# Supplementary material for: Engineering paralog-specific PSD-95 recombinant binders as minimally interfering multimodal probes for advanced imaging techniques
Source: eLife. 2024 Jan 3;13:e69620. doi: 10.7554/eLife.69620 (PMC10803022; doi:10.7554/eLife.69620)
Supplement: Supplementary file 2. — 1. Rimbault et al., 2019. 2. Sainlos et al., 2011 3. Boyden et al., 2005 4. Gross et al., 2013 5. Chen et al., 2013 6. Dana et al., 2019 7. Mondin et al., 2011. [file elife-69620-supp2.xlsx]

## Sheet: Oligos
Name	Seq (5'-3')	Purpose	Used for plasmid
Xop-0612	gggaattccatatgagctctgtcagttccgtgccg	Xph cloning into pIGc	p06
Xop-0583	ccgctcgagggtaccggtacggtaattg	Xph cloning into pIGc	p06
Xop-0716	ggaagatctggcggttcgggcggtagc	Xph cloning into pCAG	p09/10/11/12
Xop-0713	ccgtgtacattatgcatagtctggcacgtcatac	Xph cloning into pCAG	p09/10/11/12
Xop-0790	cgcggatccaggcggttcgggcggttcgggaatgtcggtaccgctgac	mIFP cloning into pEGFP-N1	p13
Xop-0789	gcgtgtacattatttggactgagactgtgcaaag	mIFP cloning into pEGFP-N1	p13
Xop-0814	cccaagcttgccaccatggcggccgaaaaggtcatggagatc	PSD-95-2 cloning into pEGFP-N1	p13
Xop-0815	ccgggatcccgggcattgctgggcttggccacc	PSD-95-2 cloning into pEGFP-N1	p13
Xop-0990	ggcgctagctccgtgccgaccaaactg	Xph cloning into pCAG-mIRFP670nuc-TEV-xxx	p16/17/18
Xop-1057	ccgtgtacattaacggtaattgatagaaatc	Xph cloning into pCAG-mIRFP670nuc-TEV-xxx	p16/17/18
ODC1753	gatgctagcgccgccaccatggcggg	Xph cloning into AAV-Syn-XXX-eGFP-CCR5TC	p19/20/21
ODC1754	gatgcatgcagatccggcac	Xph cloning into AAV-Syn-XXX-eGFP-CCR5TC	p19/20/21
Xop-0658	cggggtaccgcgggcccggggccaccatggcgggcagctctgtcagttccgtg	Xph cloning into pCAG_xxx-eGFP-CCR5TC	p23/24/25
Xop-0607	ggaagatctactggagccgctaccggtacggtaattgatagaaatc	Xph cloning into pCAG_xxx-eGFP-CCR5TC	p23/24/25
Xop-0788	cggagatctggtagcggcgtgtctaagggcgaagag	mRuby2 cloning into pCAG_Xph-XXX-CCR5TC	p30
Xop-0787	ggagctagcagaggagccgctacccttgtacagctcgtccatc	mRuby2 cloning into pCAG_Xph-XXX-CCR5TC	p30
Xop-1054	gaagatctgtgagcaagggcgaggcag	mScarlet-I cloning into pCAG_Xph-XXX-CCR5TC	p31
Xop-0639	cggctagccttgtacagctcgtccatgccg	mScarlet-I cloning into pCAG_Xph-XXX-CCR5TC	p31
Xop-1014	ggcccatgggcagctctgtcagttcc	Xph20-mScarlet-I cloning into pTriex-5	p32
Xop-1013	ccgctcgagagagccacctcccacgtgc	Xph20-mScarlet-I cloning into pTriex-5	p32
Xop-0822	cggagatctggtagcggcgtgagcaagggcgagg	mNeonGreen cloning into pCAG_Xph-XXX-CCR5TC	p33
Xop-0821	ggagctagcagaggagccgctacccttg	mNeonGreen cloning into pCAG_Xph-XXX-CCR5TC	p33
Xop-0856	cggagatctggtagcggcgacaaagactgcgaaatg	SNAPf cloning into pCAG_Xph-XXX-CCR5TC	p35/36
Xop-0855	ggagctagcagaggagccgctaccgcctgcaggacccagccc	SNAPf cloning into pCAG_Xph-XXX-CCR5TC	p35/36
ODC981	gctagatctgggagtgcgattaagccagac	mEos3.2 cloning into pCAG_Xph-XXX-CCR5TC	p37
ODC982	gctgctagctcgtctggcattgtcagg	mEos3.2 cloning into pCAG_Xph-XXX-CCR5TC	p37
ODC983	ggtgctagcggagctggcgctggagcg	mEos3.2 cloning into pCAG_Xph-XXX-CCR5TC	p37
ODC984	tctctgtctcgacaagcc	mEos3.2 cloning into pCAG_Xph-XXX-CCR5TC	p37
Xop-1096	cggagatctggtagcggcgcagaaatcggtactggctttc	HaloTag cloning into pCAG_Xph-XXX-CCR5TC	p38
Xop-1097	ggagctagcagaggagccgctaccgccggaaatctcgagcgtcg	HaloTag cloning into pCAG_Xph-XXX-CCR5TC	p38
Xop-0726	cgcggatcccgccaccatggcgggcagctctgtc	Xph cloning into pGP-CMV-GCaMP6f	p40
Xop-0727	ccgctcgaggctaccgcccgaaccgcc	Xph cloning into pGP-CMV-GCaMP6f	p40
Xop-0658	cggggtaccgcgggcccggggccaccatggcgggcagctctgtcagttccgtg	Xph cloning into pCAG	p42
Xop-0607	ggaagatctactggagccgctaccggtacggtaattgatagaaatc	Xph cloning into pCAG	p42
Xop-1129	cgacgcgtttacttcgctgtcatcatttgtac	GCaMP cloning into pCAG_Xph-XXX-CCR5TC	p42
Xop-1106	gaagatctgactcatcacgtcgtaagtgg	GCaMP cloning into pCAG_Xph-XXX-CCR5TC	p42/43
Xop-0803	ccggctagcgctaccgcccgaaccgccgctaccgcccgaaccgcccttcgctgtcatcatttg	GCaMP cloning into pCAG_Xph-XXX-CCR5TC	p43
