# Supplementary material for: Engineering paralog-specific PSD-95 recombinant binders as minimally interfering multimodal probes for advanced imaging techniques
Source: eLife. 2024 Jan 3;13:e69620. doi: 10.7554/eLife.69620 (PMC10803022; doi:10.7554/eLife.69620)
Supplement: Supplementary file 3. [file elife-69620-supp3.xlsx]

## Sheet: Plasmids sub
Entry	Plasmid name	Plasmid backbone	Origin of replication	Promoter	Gene	Purpose	Tag(s)	Figure(s), Figure Supplement (FS)	Source ref	Addgene ID
p01	NO-PSD-95-12	pET-NO	pBR322	T7	PSD-95-12 [61-249]	NMR, FP	His8; TEVcs	1b,c,d; F1FS1; F1FS2	1	—
p02	pET-24a(+)	pET-24a(+)	pBR322	T7	Ø	Molecular biology	T7 tag; His6	—	c	—
p03	pIGc-Xph20	pIGc	pBR322	T7	Xph20 [S63K]	NMR, FP	His10	1b,c; F1FS1; F1FS2c,d	1	133030
p04	pIGc-Xph18	pIGc	pBR322	T7	Xph18 [S63K]	NMR, FP	His10	1b,d; F1FS1; F1FS2d	1	133029
p05	pIGc-Xph15	pIGc	pBR322	T7	Xph15 [S63K]	NMR, FP	His10	1b,c; F1FS1; F1FS2c,d	1	133028
p06	pIGc-Xph0	pIGc	pBR322	T7	Xph0	NMR, FP	His10	1c	*	—
p07	Stargazin mCherry [-21]	pcDNA3	SV40	CMV	Stargazin	FRET	mCherry at position -21	1e	2	—
p08	PSD-95 eGFP	pcDNA3	SV40	CMV	PSD-95	FRET	eGFP at position +253	1e; 3e,f,g	2	—
p09	pCAG_Xph15	pCAG	SV40	CAG	Xph15	FRET	HA	1e	*	—
p10	pCAG_Xph18	pCAG	SV40	CAG	Xph18	FRET	HA	1e	*	—
p11	pCAG_Xph20	pCAG	SV40	CAG	Xph20	FRET	HA	1e	*	—
p12	pCAG_Xph0	pCAG	SV40	CAG	Xph0	FRET	HA	1e	*	—
p13	pmIFP-PSD-95-2	pEGFP-N1	SV40	CMV	PSD-95-2 [155-249]	FRET	mIFP	1e	*	—
p14	pcDNA-FRET-PSD-95-12 (no stg)	pcDNA3	SV40	CMV	FRET sensor OFF ( negative control)	FRET	eGFP, mCherry	1f	*	—
p15	pcDNA-FRET-PSD-95-12	pcDNA3	SV40	CMV	FRET sensor	FRET	eGFP, mCherry	1f	*	—
p16	pCAG-mIRFP670nuc-TEV-Xph15	pCAG	SV40	CAG	Xph15 [S63K], mIRFP670-Nuc	FRET	—	1f	*	—
p17	pCAG-mIRFP670nuc-TEV-Xph18	pCAG	SV40	CAG	Xph18 [S63K], mIRFP670-Nuc	FRET	—	1f	*	—
p18	pCAG-mIRFP670nuc-TEV-Xph20	pCAG	SV40	CAG	Xph20 [S63K], mIRFP670-Nuc	FRET	—	1f	1	—
p19	AAV-Syn-Xph15-eGFP-CCR5TC	AAV	pBR322	hSyn	Xph15 - eGFP-CCR5 ZF-KRAB(A)	Electrophysiology	eGFP	2a,b,c,d,e	*	187444
p20	AAV-Syn-Xph18-eGFP-CCR5TC	AAV	pBR322	hSyn	Xph18 - eGFP-CCR5 ZF-KRAB(A)	Electrophysiology	eGFP	2a,b,c,d,e	*	187443
p21	AAV-Syn-Xph20-eGFP-CCR5TC	AAV	pBR322	hSyn	Xph20 - eGFP-CCR5 ZF-KRAB(A)	Electrophysiology, Interactomics	eGFP	2a,b,c,d,e,i; F2FS3	*	187442
p22	pAAV Syn-eGFP	AAV	pBR322	hSyn	eGFP	Electrophysiology, Interactomics	eGFP	2a,b,c,d,e,i; F2FS3	3	58867
p23	pCAG_Xph15-eGFP-CCR5TC	pCAG	SV40	CAG	Xph15 - eGFP-CCR5 ZF-KRAB(A)	Imaging	eGFP	2f,g,h; 3; 4; F2FS1,2	*	135528
p24	pCAG_Xph18-eGFP-CCR5TC	pCAG	SV40	CAG	Xph18 - eGFP-CCR5 ZF-KRAB(A)	Imaging	eGFP	2f,g,h; 3; F2FS1,2	*	135529
p25	pCAG_Xph20-eGFP-CCR5TC	pCAG	SV40	CAG	Xph20 - eGFP-CCR5 ZF-KRAB(A)	Imaging	eGFP	2f,g,h; 3; 4; F2FS1,2;F3FS1;F5FS1a,b	*	135530
p26	pCAG_PSD95.FingR-eGFP-CCR5TC	pCAG	SV40	CAG	PSD95.FingR - eGFP-CCR5 ZF-KRAB(A)	Imaging	eGFP	3a,b,c,d	4	46295
p27	PSD-95 shRNA_mCherry	FUGW	pBR322	H1/UbC	shRNA PSD-95	Imaging	mCherry	4a,b,c,d	*	—
p28	Scramble shRNA_mCherry	FUGW	pBR322	H1/UbC	shRNA scramble	Imaging	mCherry	4a,b,c,d	*	—
p29	PSD-95-mScarlet-I	pEGFP-N1	SV40	CMV	PSD-95	Imaging	mScarlet-I	4d,e,f	*	—
p30	pCAG_Xph20-mRuby2-CCR5TC	pCAG	SV40	CAG	Xph20 - mRuby2-CCR5 ZF-KRAB(A)	Imaging	mRuby2	F3FS1	*	135531
p31	pCAG_Xph20-mScarlet-I-CCR5TC	pCAG	SV40	CAG	Xph20 - mScarlet-I-CCR5 ZF-KRAB(A)	Imaging	mScarlet-I	—	*	—
p32	pTriex_Xph20-mScarlet-I	pTriex-5	ColE1	CMV	Xph20 - mScarlet-I-CCR5 ZF-KRAB(A)	Imaging	mScarlet-I	F3FS1	*	—
p33	pCAG_Xph15-mNeonGreen-CCR5TC	pCAG	SV40	CAG	Xph15 - mNeonGreen-CCR5 ZF-KRAB(A)	Imaging	mNeonGreen	5a,b,c,d	*	135533
p34	pCAG_Xph20-mNeonGreen-CCR5TC	pCAG	SV40	CAG	Xph20 - mNeonGreen-CCR5 ZF-KRAB(A)	Imaging	mNeonGreen	—	*	135534
p35	pCAG_Xph15-SNAPf-CCR5TC	pCAG	SV40	CAG	Xph15 - SNAPf-CCR5 ZF-KRAB(A)	Imaging	Fast kinetics SNAP-tag	5e,f,g; F5FS1c,d	*	135536
p36	pCAG_Xph20-SNAPf-CCR5TC	pCAG	SV40	CAG	Xph20 - SNAPf-CCR5 ZF-KRAB(A)	Imaging	Fast kinetics SNAP-tag	7, F7FS1a	*	135537
p37	pCAG_Xph20-mEos3.2-CCR5TC	pCAG	SV40	CAG	Xph20 - mEos3.2-CCR5 ZF-KRAB(A)	Imaging	mEos3.2	6; F6FS1	*	135532
p38	pCAG_Xph20-HaloTag-CCR5TC	pCAG	SV40	CAG	Xph20 - HaloTag-CCR5 ZF-KRAB(A)	Imaging	HaloTag	F7FS1b	*	—
p39	pGP-CMV-GCaMP6f	pCMV	SV40	CMV	GCaMP6f	Imaging	GCaMP6f	F8FS1a, Video 1	5	40755
p40	pCMV_Xph15-GCAMP6f	pEGFP-N1	SV40	CMV	Xph15 - GCaMP6f	Imaging	GCaMP6f	F8FS1b, Video 2	*	135538
p41	pGP-CMV-jGCaMP7f	pCMV	SV40	CMV	GCaMP7f	Imaging	GCaMP7f	8	6	104483
p42	pCAG_Xph20-GCAMP7f	pCAG	SV40	CAG	Xph20 - GCaMP7f	Imaging	GCaMP7f	8, F8FS1c	*	135539
p43	pCAG_Xph20-GCAMP7f-CCR5TC	pCAG	SV40	CAG	Xph20 - GCaMP7f-CCR5 ZF-KRAB(A)	Imaging	GCaMP7f	F8FS1d	*	—
p44	Homer-DsRed	pcDNA3	SV40	CMV	Homer - DsRed	Imaging	DsRed	8, F8FS1c,d	7	—
	References
	1	Rimbault C, et al. Engineering selective competitors for the discrimination of highly conserved protein-protein interaction modules. Nat Commun 10, 4521 (2019).
	2	Sainlos M, et al. Biomimetic divalent ligands for the acute disruption of synaptic AMPAR stabilization. Nat Chem Biol 7, 81 (2011).
	3	Boyden, E.S., et al. Millisecond-timescale, genetically targeted optical control of neural activity. Nat Neurosci 8, 1263 (2005).
	4	Gross GG, et al. Recombinant probes for visualizing endogenous synaptic proteins in living neurons. Neuron 78, 971 (2013).
	5	Chen TW, et al. Ultrasensitive fluorescent proteins for imaging neuronal activity. Nature 499, 295 (2013).
	6	Dana H, et al. High-performance calcium sensors for imaging activity in neuronal populations and microcompartments. Nat Methods 16, 649 (2019).
	7	Mondin M, et al. Neurexin-Neuroligin Adhesions Capture Surface-Diffusing AMPA Receptors through PSD-95 Scaffolds. J Neurosci 31, 13500 (2011).
